# Supplementary material for: Genes Bound by ΔFosB in Different Conditions With Recurrent Seizures Regulate Similar Neuronal Functions
Source: Front Neurosci. 2020 May 28;14:472. doi: 10.3389/fnins.2020.00472 (PMC7268090; doi:10.3389/fnins.2020.00472)
Supplement: Supplementary file 1 [file Data_Sheet_1.XLSX]

## Sheet: APP Genes - List
0610043K17Rik
1110037F02Rik
1700001F09Rik
1700007G11Rik
1700008F21Rik
1700008P02Rik
1700012A03Rik
1700012I11Rik
1700013H16Rik
1700015F17Rik
1700016P04Rik
1700017B05Rik
1700017D01Rik
1700018C11Rik
1700019D03Rik
1700022A22Rik
1700023F02Rik
1700025K24Rik
1700027I24Rik
1700027J07Rik
1700030F04Rik
1700031M16Rik
1700031P21Rik
1700046C09Rik
1700047E10Rik
1700047L14Rik
1700048M11Rik
1700049L16Rik
1700054K19Rik
1700060C16Rik
1700063O14Rik
1700065J11Rik
1700091H14Rik
1700092C10Rik
1700101O22Rik
1700113H08Rik
1700121L16Rik
1700122O11Rik
1700123K08Rik
1700123O12Rik
1700128F08Rik
1810006J02Rik
1810030O07Rik
2010005H15Rik
2010109A12Rik
2210407C18Rik
2210408I21Rik
2210417A02Rik
2310001H17Rik
2310002L09Rik
2310009B15Rik
2310057J18Rik
2310079G19Rik
2310081J21Rik
2410012M07Rik
2610002J02Rik
2610002M06Rik
2610005L07Rik
2610018G03Rik
2610316D01Rik
2700054A10Rik
2810007J24Rik
2810021J22Rik
2810049E08Rik
2810404M03Rik
2900005J15Rik
2900079G21Rik
3000002C10Rik
3100003L05Rik
3110007F17Rik
3110082J24Rik
3830403N18Rik
3830406C13Rik
3830417A13Rik
4921509C19Rik
4921511C10Rik
4921511C20Rik
4921511M17Rik
4921533I20Rik
4930405L22Rik
4930412C18Rik
4930413F20Rik
4930413G21Rik
4930425K10Rik
4930428D18Rik
4930428G15Rik
4930429D17Rik
4930429F11Rik
4930430A15Rik
4930430D24Rik
4930433B08Rik
4930440I19Rik
4930442J19Rik
4930447C04Rik
4930448C13Rik
4930448I18Rik
4930452N14Rik
4930453H23Rik
4930455D15Rik
4930468A15Rik
4930474G06Rik
4930474H20Rik
4930474N09Rik
4930478L05Rik
4930502E18Rik
4930503E14Rik
4930515G16Rik
4930519F09Rik
4930524C18Rik
4930524O05Rik
4930525G20Rik
4930525M21Rik
4930526L06Rik
4930527G23Rik
4930529C04Rik
4930529K09Rik
4930532M18Rik
4930533P14Rik
4930539M17Rik
4930546C10Rik
4930548K13Rik
4930552N02Rik
4930563D23Rik
4930572K03Rik
4930578C19Rik
4930578E11Rik
4930597G03Rik
4931408C20Rik
4931431F19Rik
4932412D23Rik
4932415M13Rik
4932416K20Rik
4932435O22Rik
4933402D24Rik
4933403O08Rik
4933411E08Rik
4933416I08Rik
4933421I07Rik
5031434C07Rik
5430401F13Rik
5430403N17Rik
5430427O19Rik
5730422E09Rik
5930430L01Rik
6030407O03Rik
6330403K07Rik
6330408A02Rik
6330416G13Rik
6820431F20Rik
7420426K07Rik
8430426J06Rik
9030619P08Rik
9030624G23Rik
9130024F11Rik
9130204L05Rik
9230110F15Rik
9330159F19Rik
9330175E14Rik
9330182L06Rik
9430014N10Rik
9430019J16Rik
9430037G07Rik
9430076C15Rik
9530002B09Rik
9530036O11Rik
9530068E07Rik
9630013A20Rik
9630028H03Rik
9930111J21Rik1
9930111J21Rik2
a
A1bg
A2m
A330021E22Rik
A330093E20Rik
A530006G24Rik
A530053G22Rik
A630010A05Rik
A630033H20Rik
A630095E13Rik
A730006G06Rik
A730017C20Rik
A730036I17Rik
A730046J19Rik
A830009L08Rik
A830018L16Rik
A930009A15Rik
A930011G23Rik
AA792892
AA986860
Aadac
Aadacl2
Aard
Abca12
Abca14
Abca17
Abcb1a
Abcb4
Abcd3
Abcg2
Abi3bp
Abo
Abra
Abt1
Acadl
Acn9
Acnat2
Acp1
Acrv1
Acsl1
Acsl3
Acsm5
Acvr1c
Adam26a
Adam34
Adamts12
Adamts18
Adamts19
Adamts20
Adamts6
Adamts7
Adamtsl3
Adarb2
Adcy2
Adcy8
Adh4
Adh5
Adh6a
Adh6-ps1
Adrb3
Afg3l1
Afm
Agbl1
Agbl4
Agmo
Agr3
Agxt2
Ahcy
AI593442
AI607873
AI847159
Ak4
Ak5
Akap1
Akap9
Akr1c13
Akr1c14
Akr1c18
Alg11
Alg13
Alkbh1
Alox5ap
Amacr
Amer1
Ampd1
Amph
Amy1
Amy2a2
Amy2a3
Amy2a4
Amy2a5
Amy2b
Anapc10
Angel1
Ankrd11
Ankrd44
Ankrd46
Ankrd66
Anks1b
Ankub1
Ano2
Ano3
Antxr2
Apol11a
Apool
Aqp9
Areg
Arf4
Arhgap10
Arhgap11a
Arhgap29
Arhgap36
Arhgap42
Arhgap5
Arhgef1
Arhgef12
Arhgef26
Arhgef9
Armc3
Arsj
Asap1
Asb5
Ascl1
Asic2
Asns
Asph
Aspm
Asxl2
Asxl3
Atl2
Atp10a
Atp10b
Atp11c
Atp13a1
Atp6ap2
Atp7b
Atp8a1
Atxn7l1
Auts2
AW046200
AW112010
AW209491
AW554918
AW822252
AY761184
Azi2
B230208H11Rik
B230209E15Rik
B3galnt2
B4galnt3
B630005N14Rik
B630019K06Rik
B9d1
Bai3
Bard1
Barx2
BB287469
Bbox1
Bbs9
BC005561
BC006965
BC030500
BC048403
BC053393
Bc1
Bcar3
Bckdhb
Bcl2
Bcl2a1a
Bcl2a1d
Bcl6
Bdnf
Bfar
Bhmt
Bloc1s4
Bmp3
Bmpr1b
Bpifa1
Bpifa2
Bpifa3
Bpifa5
Bpifa6
Braf
Brinp1
Brinp3
Bsph1
Bsph2
Btbd3
Btg3
Btn1a1
Btn2a2
Btnl10
C030013G03Rik
C030037D09Rik
C130060K24Rik
C130071C03Rik
C1galt1
C1galt1c1
C1ql3
C1qtnf3
C230004F18Rik
C230035I16Rik
C4bp-ps1
C630028M04Rik
C77370
C86695
C87414
C87977
C8a
Cabp5
Cadm2
Cadps2
Calb1
Calcr
Camk4
Camkmt
Camp
Capsl
Car1
Car13
Cartpt
Cask
Casp12
Cast
Catsperb
Cblb
Ccdc104
Ccdc126
Ccdc138
Ccdc146
Ccdc171
Ccdc34
Ccdc34os
Ccdc39
Ccdc70
Ccdc71l
Ccdc86
Ccdc88a
Ccnc
Ccnd3
Ccng1
Ccng2
Ccnh
Ccni
Ccno
Ccny
Ccr1
Ccr8
Ccr9
Ccser1
Cct5
Cd19
Cd209a
Cd209b
Cd209d
Cd209e
Cd2ap
Cd46
Cd59a
Cd59b
Cd5l
Cd69
Cd79a
Cd96
Cd97
Cdc20b
Cdc25a
Cdc42ep3
Cdh10
Cdh13
Cdh20
Cdh6
Cdk14
Cdkal1
Cdr1
Cdrt4
Cdyl
Ceacam10
Celf2
Celf4
Cenpe
Cenpk
Cenpw
Cep128
Cep83
Cep83os
Cerkl
Ces2a
Ces2b
Ces2c
Ces2d-ps
Ces5a
Cfhr1
Chchd6
Chd7
Chek1
Chm
Chn1
Chn2
Chrdl1
Chrm3
Chrna6
Chrna7
Chrnb3
Chrnb4
Chst2
Chst9
Chsy3
Churc1
Ciita
Ckap2l
Cks1brt
Clca1
Cldn12
Cldn16
Cldn17
Cldn8
Clec14a
Clec2d
Clec2e
Clec4g
Clip4
Clock
Clvs2
Cmc1
Cmss1
Cngb3
Cnksr2
Cnksr3
Cnot1
Cnot6l
Cntn1
Cntn3
Cntn4
Cntn5
Cntnap2
Cntnap4
Cntnap5a
Cntnap5c
Col16a1
Col19a1
Col28a1
Col4a4
Col4a5
Commd2
Coq3
Coq7
Cpe
Cpeb2
Cped1
Cpne2
Cpped1
Cpq
Cpt1a
Cradd
Creb5
Crebzf
Crisp2
Crisp3
Crnkl1
Crot
Crp
Crtc3
Crygn
Csde1
Csgalnact1
Csmd1
Csmd3
Csnk1g1
Csnka2ip
Csrnp1
Ctage5
Ctdp1
Ctnna2
Ctnna3
Ctnnd2
Ctsc
Ctsg
Ctsh
Cul4b
Cul5
Cwc22
Cx3cr1
Cxcl1
Cxcl12
Cxcl13
Cxcl15
Cxcl2
Cxcl3
Cxcl5
Cxcr6
Cxx1a
Cxx1b
Cxx1c
Cyb5r2
Cyb5r4
Cybb
Cylc1
Cyp26a1
Cyp26c1
Cyp2a4
Cyp2b10
Cyp2b9
Cyp2c38
Cyp2c39
Cyp2c44
Cyp2c50
Cyp2c54
Cyp2c67
Cyp2c68
Cyp2c70
Cyp2j12
Cyp3a16
Cyp3a25
Cyp3a41b
Cyp3a57
Cyp3a59
Cyp4a29
Cyp4x1
Cypt12
Cypt14
Cytip
D130009I18Rik
D15Ertd621e
D16Ertd472e
D3Ertd254e
D3Ertd751e
D530049I02Rik
D5Ertd579e
D730048I06Rik
D830030K20Rik
D830032E09Rik
D930016D06Rik
D930020B18Rik
Dab2ip
Dach1
Dach2
Dbndd1
Dcaf12l2
Dcc
Dcdc2c
Dclk2
Dcx
Ddx24
Ddx39
Decr1
Defa17
Defa24
Defa4
Defa6
Defa-ps1
Defa-ps12
Defa-ps13
Defb1
Defb11
Defb12
Defb13
Defb14
Defb15
Defb19
Defb21
Defb25
Defb28
Defb29
Defb3
Defb34
Defb35
Defb36
Defb37
Defb38
Defb39
Defb4
Defb40
Defb45
Defb46
Defb5
Defb6
Defb8
Degs2
Dennd5a
Dennd6a
Derl2
Desi2
Dgkd
Dgkq
Dhrs7
Dhx29
Dhx33
Dhx36
Diap2
Dip2c
Dis3l2
Dlg5
Dlgap3
Dmd
Dmrta1
Dmrtc2
Dmtf1
Dnah11
Dnah5
Dnajb7
Dnajc13
Dnajc24
Dnajc5b
Dnajc6
Dnd1
Dner
Dnm1l
Dnm3
Dnmt1
Dopey2
Dph6
Dpp6
Dppa1
Dpt
Dpy19l4
Dpyd
Dpysl3
Dsc3
Dsg1a
Dsg1b
Dsg1c
Dsg4
Dtnb
Dtwd1
Dtx4
Dusp10
Dusp21
Dusp23
Dusp26
Dux
DXBay18
Dynap
Dynlt3
Dzip3
E130008D07Rik
E330012B07Rik
E330023G01Rik
E330034G19Rik
Ear12
Ear2
Ear3
Ebag9
Ebf1
Ece1
Echdc1
Eda2r
Edil3
Efcab1
Efcab10
Efcab2
Efemp1
Efr3a
Egfem1
Ehbp1
Eif2s2
Eif3g
Eif4ebp1
Eif4g3
Eif5a2
Elmo1
Elmod2
Elovl4
Elp5
Emc2
Eml4
Eml6
Emp2
Emr1
Enah
Enox2
Epb4.1l2
Epc1
Epgn
Epn2
Eqtn
Erap1
Erbb4
Ercc6
Ereg
Erich1
Ermn
Esp1
Esp3
Esp31
Esp38
Esp4
Esp5
Esp6
Esp6Esp5
Esp8
Esr1
Esrp1
Esrrg
Etl4
Eva1a
Evl
Exo1
Exoc6
Exoc6b
Ezh2
F13b
F8
F830016B08Rik
F8a
F9
Fabp2
Fabp7
Faim
Faim3
Fam107b
Fam110b
Fam110c
Fam135a
Fam150b
Fam154a
Fam155a
Fam162b
Fam172a
Fam173b
Fam174a
Fam179b
Fam180a
Fam183b
Fam184a
Fam192a
Fam198a
Fam19a1
Fam19a4
Fam221a
Fam227b
Fam46a
Fam46c
Fam46d
Fam83g
Fam92a
Fancl
Farsb
Fastkd2
Fat4
Faxc
Fbxl17
Fbxl4
Fbxo3
Fbxo33
Fbxw15
Fbxw18
Fbxw19
Fbxw24
Fcamr
Fcer2a
Fcgbp
Fcho1
Fcrl1
Fcrl5
Fcrls
Fdx1l
Fert2
Fezf2
Fgd4
Fgf12
Fgf13
Fgf14
Fgf18
Fgf20
Fgfrl1
Fhit
Fhl2
Fhl5
Fhod3
Filip1l
Firre
Fkbp1a
Flnb
Flrt2
Fmn2
Fmo1
Fmo2
Fmo4
Fmo6
Fndc3a
Fntb
Focad
Foxl2
Foxl2os
Foxn2
Foxn3
Foxp4
Fpr-rs3
Frem2
Frmd7
Fstl5
Fundc1
Fut8
Fyco1
Fzd8
G530011O06Rik
G630055G22Rik
Gab2
Gabra3
Gabrg2
Gal
Galnt11
Galnt12
Galnt13
Galnt5
Galnt7
Galntl5
Galntl6
Gareml
Gas8
Gatad2a
Gbp10
Gbp4
Gbp9
Gcc2
Gemin2
Gins3
Gipc1
Gjd4
Gltp
Glycam1
Gm10033
Gm10057
Gm10058
Gm10096
Gm10147
Gm10230
Gm10375
Gm10377
Gm10406
Gm10409
Gm10439
Gm10466
Gm10486
Gm10487
Gm10488
Gm10494
Gm10512
Gm10640
Gm10662
Gm10666
Gm10681
Gm10696
Gm10745
Gm10754
Gm10778
Gm10823
Gm10825
Gm10921
Gm11166
Gm11213
Gm1123
Gm11240
Gm11487
Gm11757
Gm11758
Gm12159
Gm12169
Gm12171
Gm12185
Gm12718
Gm12886
Gm12887
Gm12888
Gm13034
Gm13102
Gm13124
Gm13139
Gm13177
Gm13178
Gm13238
Gm13242
Gm13497
Gm13544
Gm13546
Gm13871
Gm14023
Gm14151
Gm14308
Gm14322
Gm14325
Gm14326
Gm14327
Gm14345
Gm14346
Gm14347
Gm14351
Gm14393
Gm14459
Gm14496
Gm14501
Gm14548
Gm14625
Gm14632
Gm14685
Gm14743
Gm14781
Gm14819
Gm14920
Gm15080
Gm15091
Gm15097
Gm15107
Gm15114
Gm15127
Gm15140
Gm1527
Gm15315
Gm15319
Gm15408
Gm15645
Gm15880
Gm16381
Gm16386
Gm16405
Gm16430
Gm16432
Gm16442
Gm16445
Gm16451
Gm16523
Gm16551
Gm16833
Gm16894
Gm1715
Gm1720
Gm17644
Gm17689
Gm17745
Gm17751
Gm17757
Gm18853
Gm19299
Gm19689
Gm19757
Gm19784
Gm1995
Gm19990
Gm2012
Gm20125
Gm2016
Gm2022
Gm20268
Gm2030
Gm2042
Gm20752
Gm20754
Gm20756
Gm2083
Gm2087
Gm2109
Gm21319
Gm21637
Gm2176
Gm21949
Gm21950
Gm21951
Gm2382
Gm2799
Gm2825
Gm2837
Gm2863
Gm2897
Gm2913
Gm2927
Gm2933
Gm3139
Gm3286
Gm3383
Gm3428
Gm3488
Gm3558
Gm3604
Gm3696
Gm3701
Gm3706
Gm3750
Gm3763
Gm4027
Gm4070
Gm4133
Gm4175
Gm4177
Gm4187
Gm4214
Gm4216
Gm4297
Gm436
Gm4498
Gm4541
Gm4567
Gm4736
Gm4836
Gm4841
Gm4907
Gm4926
Gm4937
Gm4944
Gm4951
Gm4961
Gm4981
Gm4984
Gm5065
Gm5071
Gm5072
Gm5087
Gm5108
Gm5132
Gm5169
Gm525
Gm527
Gm5346
Gm5347
Gm5382
Gm5523
Gm5538
Gm5544
Gm5577
Gm5615
Gm5640
Gm5725
Gm5728
Gm5795
Gm5796
Gm5803
Gm5860
Gm5886
Gm5891
Gm5893
Gm5925
Gm5934
Gm5935
Gm5938
Gm609
Gm6121
Gm6164
Gm6268
Gm6300
Gm6406
Gm6455
Gm6460
Gm6592
Gm6696
Gm6756
Gm6760
Gm6902
Gm6938
Gm7134
Gm7271
Gm732
Gm773
Gm7854
Gm8096
Gm8298
Gm8300
Gm833
Gm8453
Gm853
Gm8615
Gm8633
Gm8653
Gm8660
Gm8693
Gm8720
Gm906
Gm9125
Gm94
Gm9696
Gm9731
Gm9733
Gm9871
Gmcl1l
Gmnc
Gnai1
Gnao1
Gnat3
Gnb2l1
Gng4
Gnl3l
Gnpda2
Gp2
Gp49a
Gpc5
Gpihbp1
Gpm6a
Gpr110
Gpr111
Gpr115
Gpr116
Gpr137b
Gpr139
Gpr141
Gpr149
Gpr158
Gpr31b
Gpr50
Gpr98
Gprc5b
Gprin3
Gpx2
Gpx8
Gramd1a
Grap
Grem1
Gria3
Grid1
Grm5
Grm7
Gsg1l
Gucy2c
Gucy2f
Guf1
Gulp1
Gvin1
Gyk
Gypa
Gys2
Gzma
Gzmc
Gzmd
Gzme
Gzmf
Gzmg
Gzmn
H13
H1fx
H2-M1
H2-M10.5
H2-M9
Hadha
Hal
Hapln1
Hars
Hars2
Haus6
Havcr1
Hcn1
Hcrtr1
Hdac2
Hdhd1a
Hecw1
Heph
Herc3
Herpud1
Hey2
Hhat
Hhip
Hiatl1
Hibch
Hivep1
Hmgb1
Hmgn3
Hmmr
Hnf4g
Hnmt
Homer1
Hpcal1
Hpgd
Hpse2
Hs2st1
Hs3st3b1
Hs6st2
Hs6st3
Hsd17b10
Hsd3b4
Hsf3
Hsfy2
Hspbp1
Htr1f
Htr2c
Huwe1
Icam1
Icam4
Icam5
Idi2
Idua
Ifi204
Ifi205
Ifi27
Ifi27l2a
Ifi27l2b
Ifi44
Ifi44l
Ifi47
Ifna14
Iigp1
Il12b
Il12rb2
Il19
Il1a
Il1b
Il1r1
Il1r2
Il1rap
Il1rapl1
Il1rapl2
Il20
Il20ra
Il23r
Il24
Il6
Il7
Il7r
Immp1l
Impg2
Inhba
Inpp4b
Insr
Ipcef1
Iqck
Iqgap1
Iqub
Irak1bp1
Irak4
Irs4
Irx1
Itgb8
Itgbl1
Itpripl2
Jakmip2
Jmy
Kansl2
Kap
Kcnb2
Kcnc2
Kcnd2
Kcne1
Kcne1l
Kcne2
Kcnh1
Kcnh2
Kcnh7
Kcnj3
Kcnj5
Kcnj6
Kcnk2
Kcnmb2
Kcnq3
Kcnq5
Kctd13
Kctd16
Kdm4c
Kdm6a
Khdrbs2
Kif26b
Klhl1
Klhl13
Klhl2
Klhl24
Klhl28
Klhl34
Klhl42
Klhl7
Klra2
Klrb1f
Klrb1-ps1
Krtap21-1
Krtap24-1
Krtap6-2
L3mbtl4
Lalba
Lama3
Lama4
Large
Lat
Lax1
Lbr
Lca5
Lcn4
Ldb2
Ldlrad4
Lgr4
Lgr5
Lhfp
Lhfpl1
Lhx9
Lig1
Lilrb4
Lims1
Lipm
Lmbr1
Lmbrd1
Lmcd1
Lmo2
LOC100048884
LOC100503280
LOC100504039
LOC100861615
LOC101056136
LOC101056236
LOC102633035
LOC102634101
LOC102634431
LOC102635087
Lonrf1
Lonrf3
Loxl4
Lpcat4
Lphn3
Lrba
Lrfn5
Lrp1b
Lrrc4c
Lrrc7
Lrrc74
Lrrc9
Lrrk2
Lsamp
Lsm14a
Lta4h
Ltbp1
Ltv1
Lurap1l
Luzp2
Ly6a
Ly6c1
Ly6c2
Ly6f
Ly6h
Ly86
Lypd4
Lyplal1
Macc1
Macrod2
Mageb1
Mageb18
Mageb4
Magee2
Magi2
Magi3
Magohb
Mal2
Man1a
Man1a2
Man2b2
Mannr
Mansc4
Map3k3
Map4
March1
Marcks
Mbd3l1
Mbd3l2
Mbip
Mboat1
Mbtd1
Mcc
Mcf2
Mchr1
Mcidas
Mcpt4
Mcpt8
Mctp1
Mcts1
Mcts2
Mdga2
Me3
Mecom
Med10
Med14
Med30
Medag
Mef2a
Mef2c
Mei4
Melk
Meox2
Mep1a
Met
Metap1
Mettl21e
Mfn1
Mfsd1
Mgat4c
Mgat4d
Mgst1
Mia2
Micu2
Mid1
Mir1291
Mir140
Mir145b
Mir1668
Mir181a-1
Mir181b-1
Mir1899
Mir1900
Mir221
Mir222
Mir3068
Mir30b
Mir30d
Mir345
Mir449a
Mir449b
Mir449c
Mir489
Mir5126
Mir5127
Mir6238
Mir6343
Mir6348
Mir6350
Mir6362
Mir6376
Mir6388
Mir6400
Mir653
Mir680-2
Mir684-1
Mir6949
Mir704
Mir7056
Mir7058
Mir7072
Mir7073
Mir7081
Mir7082
Mir7087
Mir7089
Mir710
Mir7211
Mir764
Mir7672
Mir9-2
Mir98
Mirlet7f-2
Mis12
Mis18a
Mkx
Mllt3
Mme
Mms22l
Mndal
Mob3b
Mogat1
Morc1
Morf4l1
Morn1
Mpeg1
Mpp6
Mrap
Mrfap1
Mrgpra6
Mrgpra9
Mrgprb4
Mrgprb5
Mrgpre
Mrpl17
Mrpl32
Mrpl4
Mrps28
Mrps33
Mrps35
Mrvi1
Ms4a10
Ms4a15
Ms4a18
Ms4a8a
Msi2
Msr1
Msrb2
Mstn
Mtbp
Mtcl1
Mthfd2l
Mtl5
Mtpap
Mtx3
Muc19
Muc6
Mug2
Mug-ps1
Mup1
Mup10
Mup11
Mup12
Mup17
Mup19
Mup2
Mup3
Mup9
Mycbp2
Mycs
Myct1
Mylk3
Myo3a
Myom2
Mysm1
Myt1
Nabp1
Nalcn
Nbas
Nbea
Nbn
Ncald
Nckap5
Ncoa3
Ncoa7
Ndrg1
Ndrg4
Ndufa4
Necab1
Nek10
Nek4
Nek5
Nek7
Nell1
Neurod1
Neurod4
Nfatc1
Nfatc2ip
Nfib
Ngf
Nin
Nipal2
Nit2
Nkain2
Nkain3
Nkx2-6
Nkx3-1
Nlrc5
Nlrp1a
Nlrp1b
Nlrp2
Nlrp4e
Nlrp9b
Nlrp9c
Nme6
Nop10
Npas3
Npbwr1
Npm1
Npsr1
Nr0b1
Nr1h5
Nras
Nrg3
Nrip3
Nrn1
Nrp
Nrxn1
Nsdhl
Nsfl1c
Ntng1
Nub1
Nubp1
Nudcd2
Nupl2
Nutm1
Nwd2
Nxph1
Nxt2
Nyap2
Obox1
Obp1a
Olfm3
Olfr10
Olfr1145
Olfr1148
Olfr1151
Olfr1152
Olfr1153
Olfr1154
Olfr1155
Olfr1156
Olfr1157
Olfr1158
Olfr1160
Olfr1161
Olfr1162
Olfr1163
Olfr1164
Olfr1166
Olfr1167
Olfr1168
Olfr1170
Olfr1173
Olfr1176
Olfr1178
Olfr1179
Olfr1180
Olfr1181
Olfr1182
Olfr1183
Olfr1184
Olfr1186
Olfr1193
Olfr1195
Olfr1196
Olfr1197
Olfr1198
Olfr1199
Olfr1200
Olfr1201
Olfr1247
Olfr1248
Olfr1249
Olfr1250
Olfr1251
Olfr1252
Olfr1253
Olfr1254
Olfr1265
Olfr1269
Olfr1270
Olfr1276
Olfr1277
Olfr1278
Olfr1279
Olfr1280
Olfr1281
Olfr1282
Olfr1283
Olfr1284
Olfr1286
Olfr1287
Olfr1298
Olfr1299
Olfr1300-ps1
Olfr1301
Olfr1302
Olfr1303
Olfr1313
Olfr1314
Olfr1316
Olfr1317
Olfr1318
Olfr1320
Olfr1324
Olfr1325
Olfr1387
Olfr1388
Olfr1389
Olfr1390
Olfr1391
Olfr1392
Olfr1393
Olfr1396
Olfr140
Olfr1406
Olfr1408
Olfr1433
Olfr1434
Olfr1436
Olfr1437
Olfr1440
Olfr1441
Olfr145
Olfr1505
Olfr1507
Olfr1508
Olfr1509
Olfr166
Olfr167
Olfr168
Olfr169
Olfr170
Olfr171
Olfr218
Olfr23
Olfr243
Olfr273
Olfr275
Olfr279
Olfr281
Olfr282
Olfr283
Olfr293
Olfr294
Olfr295
Olfr297
Olfr298
Olfr299
Olfr301
Olfr303
Olfr304
Olfr305
Olfr307
Olfr311
Olfr312
Olfr313
Olfr314
Olfr315
Olfr316
Olfr317
Olfr318
Olfr319
Olfr32
Olfr320
Olfr322
Olfr323
Olfr324
Olfr325
Olfr345
Olfr346
Olfr347
Olfr361
Olfr362
Olfr365
Olfr366
Olfr367-ps
Olfr371
Olfr384
Olfr385
Olfr389
Olfr390
Olfr391-ps
Olfr392
Olfr393
Olfr394
Olfr395
Olfr397
Olfr46
Olfr467
Olfr469
Olfr470
Olfr472
Olfr473
Olfr474
Olfr494
Olfr495
Olfr497
Olfr498
Olfr502
Olfr503
Olfr504
Olfr530
Olfr531
Olfr532
Olfr533
Olfr535
Olfr536
Olfr538
Olfr56
Olfr560
Olfr561
Olfr564
Olfr566
Olfr568
Olfr569
Olfr570
Olfr571
Olfr572
Olfr584
Olfr585
Olfr586
Olfr589
Olfr591
Olfr592
Olfr593
Olfr594
Olfr613
Olfr615
Olfr616
Olfr617
Olfr618
Olfr619
Olfr620
Olfr622
Olfr623
Olfr624
Olfr628
Olfr629
Olfr632
Olfr633
Olfr635
Olfr638
Olfr639
Olfr640
Olfr641
Olfr642
Olfr643
Olfr644
Olfr645
Olfr646
Olfr651
Olfr656
Olfr657
Olfr658
Olfr659
Olfr661
Olfr663
Olfr723
Olfr724
Olfr725
Olfr726
Olfr73
Olfr74
Olfr743
Olfr744
Olfr745
Olfr746
Olfr747
Olfr748
Olfr749
Olfr78
Olfr827
Olfr876
Olfr877
Olfr878
Olfr901
Olfr902
Olfr904
Olfr905
Olfr906
Olfr907
Olfr908
Olfr910
Olfr911-ps1
Olfr912
Olfr913
Olfr987
Olfr988
Onecut1
Oog1
Oog2
Oog3
Opa1
Ophn1
Oprm1
Orc6
Ostn
Otor
Ott
Otub2
Otx1
Ovch2
Oxr1
P2rx3
P2ry10
Pabpc5
Pah
Palld
Pamr1
Pank3
Pappa2
Park2
Parm1
Parpbp
Pbx3
Pcca
Pcdh11x
Pcdh15
Pcdh17
Pcdh18
Pcdh20
Pcdh7
Pcdha1
Pcdha10
Pcdha11
Pcdha12
Pcdha2
Pcdha3
Pcdha4
Pcdha4-g
Pcdha5
Pcdha6
Pcdha6-g
Pcdha7
Pcdha7-g
Pcdha8
Pcdha9
Pcnxl4
Pcsk2
Pde12
Pde1c
Pde4b
Pde7b
Pdgfc
Pdgfd
Pdia4
Pdia5
Pdilt
Pdlim1
Pdzk1
Pdzk1ip1
Pdzrn4
Pef1
Pet2
Pex7
Pf4
Pfkfb1
Pfkfb2
Pfkp
Pfpl
Pgap1
Pgk2
Phactr1
Phex
Phf14
Phf3
Phip
Phka2
Pigr
Pinc
Pira1
Pira11
Pira4
Pira6
Pira7
Pkdcc
Pkhd1
Pkhd1l1
Pkia
Pkn1
Pla2g4c
Plagl1
Plcb1
Plcl2
Plcxd2
Plin2
Plxdc2
Plxna2
Plxna4
Pnn
Pnpt1
Pom121l12
Pomgnt2
Pop1
Pou3f2
Pou3f4
Ppan
Ppap2b
Ppbp
Ppfibp1
Ppp1r2-ps7
Ppp4r4
Ppp6c
[truncated: 839 more rows]

## Sheet: APP Genes - Peak info
Condition	chr	peak start	peak end	length	abs_summit	pileup	-LOG10(pvalue)	fold_enrichment	-LOG10(qvalue)	Annotation	Detailed Annotation		Gene	Accession
APP	chr1	6908603	6908824	222	6908776	9	6.14655	4.48597	2.31281	Intergenic	L1Md_A|LINE|L1		St18	NM_173868;NR_045188;NR_045189;NM_001244692;NM_001244693
APP	chr1	7273029	7273246	218	7273071	7	6.16097	4.73429	2.31281	Intergenic	L1Md_T|LINE|L1
APP	chr1	7276544	7276743	200	7276709	9	6.3968	4.64609	2.49375	Intergenic	L1Md_T|LINE|L1
APP	chr1	7701422	7701621	200	7701484	10	9.64919	6.50965	5.25569	Intergenic	L1Md_F|LINE|L1
APP	chr1	8240650	8240869	220	8240812	11	9.08633	6.0039	4.75444	Intergenic	L1Md_T|LINE|L1
APP	chr1	11672723	11672976	254	11672837	8	6.88952	5.08983	2.88239	Intron	L1Md_F3|LINE|L1		A830018L16Rik	NM_177173;NM_001160369
APP	chr1	11707608	11707807	200	11707677	8	7.28	5.32607	3.17509	Intron	L1Md_T|LINE|L1		A830018L16Rik	NM_177173;NM_001160369
APP	chr1	12208936	12209135	200	12209009	7	4.55469	3.71687	1.33676	Intergenic	L1Md_A|LINE|L1
APP	chr1	12213372	12213571	200	12213550	8	6.88952	5.08983	2.88239	Intergenic	(TAAA)n|Simple_repeat|Simple_repeat
APP	chr1	13758494	13758770	277	13758585	9	8.00723	5.65536	3.78597	Intergenic	L1Md_F2|LINE|L1		Gm5523;Xkr9	NM_001011873;NR_004447
APP	chr1	15752104	15752303	200	15752185	9	5.29738	3.94249	1.75791	Intergenic	L1Md_F2|LINE|L1		Kcnb2;Terf1;Sbspon	NM_001033288;NM_001286628;NM_001098528;NM_009352
APP	chr1	15945088	15945328	241	15945220	10	8.74089	5.96188	4.42832	Intergenic	L1Md_A|LINE|L1		Sbspon	NM_001033288
APP	chr1	16582820	16583019	200	16582994	6	4.7943	3.95876	1.46767	Intron	intron (NR_073122, intron 2 of 4)		Ube2w	NM_001271016;NM_001271017;NR_073122;NM_025773
APP	chr1	18531869	18532074	206	18531973	8	7.28	5.32607	3.17509	Intergenic	L1Md_T|LINE|L1
APP	chr1	18751726	18751925	200	18751815	9	8.44414	5.91786	4.15533	Intergenic	RLTR10-int|LTR|ERVK
APP	chr1	19429360	19429579	220	19429511	10	7.38071	5.1107	3.24811	Intergenic	L1Md_A|LINE|L1
APP	chr1	19681672	19681895	224	19681804	9	6.66638	4.81806	2.73012	Intergenic	L1Md_A|LINE|L1
APP	chr1	19830225	19830453	229	19830403	9	6.3968	4.64609	2.49375	Intergenic	L1Md_A|LINE|L1
APP	chr1	20281592	20281860	269	20281692	11	7.54329	5.03605	3.4022	Intron	L1_Mus1|LINE|L1		Pkhd1	NM_153179
APP	chr1	20424161	20424377	217	20424259	6	5.0922	4.1425	1.60528	Intron	L1Md_T|LINE|L1		Pkhd1	NM_153179
APP	chr1	21577043	21577465	423	21577353	11	9.47285	6.24389	5.10036	Intron	L1Md_F|LINE|L1		Kcnq5	NM_001160139;NM_023872
APP	chr1	24084639	24084891	253	24084815	7	5.81683	4.52429	2.11363	Intron	L1Md_T|LINE|L1		Fam135a	NM_026604
APP	chr1	24095783	24096094	312	24095949	9	6.66638	4.81806	2.73012	Intron	intron (NM_026604, intron 1 of 20)		Fam135a	NM_026604
APP	chr1	24618312	24620411	2100	24619084	361	50.1806	2.45676	44.9475	Intergenic	Intergenic		Lmbrd1;Col19a1	NM_026719;NM_007733
APP	chr1	24620590	24621689	1100	24621389	323	42.1683	2.37201	37.1835	Intergenic	Intergenic		Lmbrd1;Col19a1	NM_026719;NM_007733
APP	chr1	24621863	24622857	995	24622254	292	34.3005	2.24612	29.4542	Intergenic	Intergenic		Lmbrd1;Col19a1	NM_026719;NM_007733
APP	chr1	25178594	25178877	284	25178693	14	12.5308	7.50487	8.00196	Intron	L1Md_Gf|LINE|L1		Bai3	NM_175642
APP	chr1	25460977	25461181	205	25461100	12	9.12349	5.83176	4.78899	Intron	L1Md_T|LINE|L1		Bai3	NM_175642
APP	chr1	25721411	25721678	268	25721532	8	7.28	5.32607	3.17509	Intron	L1Md_T|LINE|L1		Bai3	NM_175642
APP	chr1	26500078	26500301	224	26500213	9	6.3968	4.64609	2.49375	Intergenic	L1Md_A|LINE|L1
APP	chr1	26502375	26502879	505	26502718	11	8.73073	5.78167	4.42486	Intergenic	L1Md_A|LINE|L1
APP	chr1	26769620	26769819	200	26769667	7	5.81683	4.52429	2.11363	Intergenic	L1Md_F2|LINE|L1		4931408C20Rik	NM_001033764
APP	chr1	27151379	27151607	229	27151472	7	5.81683	4.52429	2.11363	Intergenic	L1Md_F2|LINE|L1
APP	chr1	28248592	28248827	236	28248643	8	7.28	5.32607	3.17509	Intergenic	L1Md_T|LINE|L1
APP	chr1	30116500	30116699	200	30116572	9	6.95815	5.00325	2.94082	Intergenic	(TG)n|Simple_repeat|Simple_repeat
APP	chr1	30788206	30788526	321	30788364	11	8.40176	5.5753	4.14211	Intergenic	L1Md_T|LINE|L1		Phf3	NM_001081080
APP	chr1	31875475	31875674	200	31875582	11	9.47285	6.24389	5.10036	Intergenic	L1Md_A|LINE|L1
APP	chr1	32138304	32138510	207	32138327	10	9.64919	6.50965	5.25569	Intergenic	L1Md_A|LINE|L1		Khdrbs2	NM_133235
APP	chr1	32339560	32339759	200	32339740	8	6.88952	5.08983	2.88239	Intron	L1_Mus3|LINE|L1		Khdrbs2	NM_133235
APP	chr1	33297196	33297395	200	33297243	8	7.28	5.32607	3.17509	Intergenic	Intergenic
APP	chr1	35103945	35104184	240	35104040	8	7.28	5.32607	3.17509	Intergenic	L1Md_F2|LINE|L1
APP	chr1	40202084	40202313	230	40202212	11	10.8917	7.10143	6.42636	Intergenic	L1Md_F2|LINE|L1		Il1r2;Il1r1;Gm16894	NR_037980;NM_008362;NM_010555
APP	chr1	43276671	43276870	200	43276786	9	8.00723	5.65536	3.78597	Intergenic	(TG)n|Simple_repeat|Simple_repeat		Fhl2	NM_010212;NM_001289533
APP	chr1	43834790	43835187	398	43834982	12	6.88037	4.45117	2.88239	Intron	intron (NM_026430, intron 7 of 14)		Uxs1	NM_026430
APP	chr1	43835394	43835836	443	43835403	14	4.43353	2.87066	1.30389	Intron	intron (NM_026430, intron 7 of 14)		Uxs1	NM_026430
APP	chr1	44341051	44341250	200	44341088	9	6.3968	4.64609	2.49375	Intergenic	L1Md_A|LINE|L1		Mettl21e	NM_207281
APP	chr1	44752881	44753080	200	44753024	7	6.16097	4.73429	2.31281	Intron	L1Md_A|LINE|L1		Gulp1	NM_028450
APP	chr1	44784537	44784802	266	44784650	10	9.1658	6.2209	4.81433	Intron	L1Md_T|LINE|L1		Gulp1	NM_028450
APP	chr1	45105749	45105948	200	45105889	7	6.16097	4.73429	2.31281	Intergenic	L1Md_Gf|LINE|L1
APP	chr1	45808386	45808585	200	45808546	8	7.28	5.32607	3.17509	Intergenic	Lx7|LINE|L1		Wdr75	NM_028599
APP	chr1	47776179	47776378	200	47776285	10	7.38071	5.1107	3.24811	Intergenic	L1Md_T|LINE|L1
APP	chr1	48553009	48553427	419	48553170	9	7.27567	5.20324	3.17509	Intergenic	Intergenic
APP	chr1	48605291	48605490	200	48605469	8	6.54678	4.8779	2.62118	Intergenic	L1Md_T|LINE|L1
APP	chr1	49666122	49666321	200	49666193	9	7.27567	5.20324	3.17509	Intergenic	L1Md_T|LINE|L1
APP	chr1	50183509	50183718	210	50183604	9	8.00723	5.65536	3.78597	Intergenic	L1Md_T|LINE|L1
APP	chr1	51600210	51600409	200	51600315	7	5.81683	4.52429	2.11363	Intergenic	(CA)n|Simple_repeat|Simple_repeat		Nabp1	NM_028696
APP	chr1	52999769	52999968	200	52999852	8	7.28	5.32607	3.17509	Intron	L1Md_Gf|LINE|L1		1700019D03Rik	NM_144953
APP	chr1	53037159	53037358	200	53037199	6	5.0922	4.1425	1.60528	Intergenic	L1Md_T|LINE|L1		Mstn;1700019D03Rik;Hibch	NM_144953;NM_010834;NM_146108
APP	chr1	53037850	53038088	239	53037933	7	4.55469	3.71687	1.33676	Intergenic	L1Md_T|LINE|L1		Mstn;1700019D03Rik;Hibch	NM_144953;NM_010834;NM_146108
APP	chr1	54877457	54878401	945	54877628	21	15.6116	7.53275	11.0069	Intron	intron (NM_001081433, intron 2 of 27)		Ankrd44	NM_001081433
APP	chr1	56772541	56772803	263	56772657	9	8.44414	5.91786	4.15533	Intergenic	L1Md_T|LINE|L1		Hsfy2;Satb2	NM_139146;NM_027661
APP	chr1	56773380	56773579	200	56773416	10	8.35562	5.72357	4.11055	Intergenic	L1Md_T|LINE|L1		Hsfy2;Satb2	NM_139146;NM_027661
APP	chr1	57123305	57123504	200	57123336	9	8.00723	5.65536	3.78597	Intergenic	L1Md_T|LINE|L1		9130024F11Rik;Satb2	NR_024325;NM_139146;NR_024326
APP	chr1	63880183	63880392	210	63880238	8	7.27152	5.32101	3.17509	Intergenic	L1Md_A|LINE|L1		Fastkd2;4933402D24Rik	NM_001256158;NM_172422
APP	chr1	68634084	68634307	224	68634227	11	8.40176	5.5753	4.14211	Intron	L1Md_T|LINE|L1		Erbb4	NM_010154
APP	chr1	71042452	71042651	200	71042548	8	7.28	5.32607	3.17509	Intergenic	(CA)n|Simple_repeat|Simple_repeat		Bard1	NM_007525
APP	chr1	71298748	71298972	225	71298814	7	5.81683	4.52429	2.11363	Intron	L1Md_T|LINE|L1		Abca12	NM_175210
APP	chr1	71299995	71300194	200	71300164	7	6.16097	4.73429	2.31281	Intron	L1Md_T|LINE|L1		Abca12	NM_175210
APP	chr1	73369223	73369437	215	73369336	11	7.54329	5.03605	3.4022	Intergenic	L1Md_T|LINE|L1		Pinc;D530049I02Rik	NR_040605;NR_003202
APP	chr1	73466686	73467010	325	73466866	11	9.89567	6.50387	5.48726	Intron	L1Md_Gf|LINE|L1		D530049I02Rik	NR_040605
APP	chr1	73783133	73783332	200	73783220	7	6.16097	4.73429	2.31281	Intron	L1_Mus3|LINE|L1		6030407O03Rik	NR_045311
APP	chr1	76507621	76507891	271	76507744	7	6.16097	4.73429	2.31281	Intergenic	CT-rich|Low_complexity|Low_complexity		Mir6343;Gm17751	NR_038012;NR_038013;NR_105761
APP	chr1	77937739	77937938	200	77937775	9	5.29738	3.94249	1.75791	Intergenic	L1Md_T|LINE|L1
APP	chr1	78570913	78571149	237	78571068	31	11.825	4.1647	7.32067	Intergenic	Intergenic		Farsb;Utp14b;Acsl3;Mogat1	NR_102757;NM_001136226;NM_028817;NM_001136222;NR_102758;NM_001001981;NM_011811;NM_026713;NM_001033606;NM_001278075
APP	chr1	78985712	78985911	200	78985823	8	6.23645	4.68292	2.37084	Intergenic	L1Md_A|LINE|L1
APP	chr1	79038201	79038400	200	79038343	9	7.62344	5.41989	3.46838	Intergenic	L1Md_A|LINE|L1
APP	chr1	79250024	79250251	228	79250142	8	7.28	5.32607	3.17509	Intergenic	L1Md_A|LINE|L1
APP	chr1	79970259	79970492	234	79970373	8	7.28	5.32607	3.17509	Intergenic	L1Md_F3|LINE|L1
APP	chr1	80044711	80044930	220	80044836	8	7.28	5.32607	3.17509	Intergenic	L1Md_A|LINE|L1
APP	chr1	81555687	81555886	200	81555804	7	6.16097	4.73429	2.31281	Intergenic	L1Md_A|LINE|L1
APP	chr1	82474158	82474357	200	82474192	20	6.58154	3.29276	2.65523	Intron	(TG)n|Simple_repeat|Simple_repeat		Col4a4	NM_007735
APP	chr1	83613302	83613510	209	83613409	12	7.9867	5.12524	3.78597	Intergenic	L1Md_A|LINE|L1
APP	chr1	83653584	83653848	265	83653718	8	7.28	5.32607	3.17509	Intergenic	CT-rich|Low_complexity|Low_complexity
APP	chr1	83819310	83819564	255	83819387	8	7.28	5.32607	3.17509	Intergenic	L1Md_T|LINE|L1
APP	chr1	84699122	84699321	200	84699247	9	5.29738	3.94249	1.75791	Intergenic	L1Md_A|LINE|L1		Mir5126;Trip12;Dner	NM_152915;NR_039588;NM_133975
APP	chr1	88726429	88726628	200	88726465	8	6.88952	5.08983	2.88239	Intron	L1Md_A|LINE|L1		Dis3l2	NM_001172157;NM_153530
APP	chr1	91115535	91115734	200	91115586	9	6.66638	4.81806	2.73012	Intergenic	L1Md_A|LINE|L1		Sh3bp4	NM_133816
APP	chr1	97412355	97412619	265	97412518	9	6.95815	5.00325	2.94082	Intergenic	L1Md_T|LINE|L1		St8sia4	NM_009183
APP	chr1	98089315	98089622	308	98089484	6	5.0922	4.1425	1.60528	Intergenic	Lx|LINE|L1
APP	chr1	98470708	98470931	224	98470754	8	6.88952	5.08983	2.88239	Intergenic	L1Md_A|LINE|L1		4930533P14Rik	NR_040478
APP	chr1	99149852	99150051	200	99149914	10	9.64919	6.50965	5.25569	Intergenic	L1Md_F3|LINE|L1
APP	chr1	99318989	99319188	200	99319075	9	8.44414	5.91786	4.15533	Intergenic	L1Md_Gf|LINE|L1
APP	chr1	99408394	99408682	289	99408453	7	6.15349	4.72978	2.31281	Intergenic	L1Md_A|LINE|L1
APP	chr1	99408747	99409066	320	99408946	8	6.88952	5.08983	2.88239	Intergenic	L1Md_A|LINE|L1
APP	chr1	100099162	100099559	398	100099209	11	8.096	5.38316	3.86852	Intergenic	L1Md_T|LINE|L1		1810006J02Rik	NR_040439
APP	chr1	101081663	101081920	258	101081861	8	7.28	5.32607	3.17509	Intergenic	L1Md_A|LINE|L1
APP	chr1	101191703	101191969	267	101191867	10	9.1658	6.2209	4.81433	Intergenic	Intergenic
APP	chr1	102635470	102635675	206	102635502	59	10.2442	2.53562	5.81836	Intergenic	Intergenic
APP	chr1	103164137	103164458	322	103164267	8	7.28	5.32607	3.17509	Intergenic	L1Md_A|LINE|L1		Gm20268	NR_037989
APP	chr1	103500640	103500880	241	103500791	7	6.16097	4.73429	2.31281	Intergenic	L1Md_A|LINE|L1
APP	chr1	104009380	104009579	200	104009444	10	7.38071	5.1107	3.24811	Intergenic	L1Md_A|LINE|L1
APP	chr1	104021111	104021471	361	104021307	10	7.38071	5.1107	3.24811	Intergenic	L1Md_A|LINE|L1
APP	chr1	104128313	104128539	227	104128364	8	7.28	5.32607	3.17509	Intergenic	(TCTCTG)n|Simple_repeat|Simple_repeat
APP	chr1	104145658	104145956	299	104145835	7	6.08301	4.68721	2.31281	Intergenic	L1Md_A|LINE|L1
APP	chr1	104900328	104900530	203	104900336	7	6.16097	4.73429	2.31281	Intergenic	L1Md_T|LINE|L1
APP	chr1	105441166	105441493	328	105441303	10	7.38071	5.1107	3.24811	Intergenic	L1Md_Gf|LINE|L1
APP	chr1	106944167	106944366	200	106944289	9	6.3968	4.64609	2.49375	Intergenic	L1Md_T|LINE|L1		Cdh20	NM_011800
APP	chr1	108516474	108516704	231	108516633	9	6.3968	4.64609	2.49375	Intron	(CA)n|Simple_repeat|Simple_repeat		Bcl2	NM_009741
APP	chr1	109541585	109541924	340	109541781	12	9.45707	6.03991	5.0882	Intergenic	(TG)n|Simple_repeat|Simple_repeat		Serpinb10;Serpinb8	NM_001159748;NM_001160307;NM_198028;NM_011459
APP	chr1	110223304	110223626	323	110223477	9	8.00723	5.65536	3.78597	Intergenic	L1Md_T|LINE|L1
APP	chr1	110303919	110304372	454	110304101	11	10.3617	6.78644	5.92478	Intergenic	L1Md_Gf|LINE|L1
APP	chr1	110631597	110631814	218	110631656	10	6.15787	4.33674	2.31281	Intergenic	L1Md_T|LINE|L1
APP	chr1	112578921	112579150	230	112579011	8	6.88952	5.08983	2.88239	Intergenic	L1Md_F2|LINE|L1
APP	chr1	115636811	115637010	200	115636907	8	7.28	5.32607	3.17509	Intergenic	MTA_Mm-int|LTR|MaLR
APP	chr1	116534178	116534377	200	116534302	8	6.88952	5.08983	2.88239	Intergenic	(GAAA)n|Simple_repeat|Simple_repeat
APP	chr1	118353225	118353607	383	118353325	8	5.45343	4.18148	1.87107	Intron	L1Md_Gf|LINE|L1		Cntnap5a	NM_001077425
APP	chr1	119103144	119103343	200	119103234	7	6.16097	4.73429	2.31281	Intergenic	L1Md_F3|LINE|L1
APP	chr1	119535773	119536046	274	119535920	8	6.88952	5.08983	2.88239	Intergenic	L1Md_T|LINE|L1
APP	chr1	119536152	119536354	203	119536232	7	6.16097	4.73429	2.31281	Intergenic	L1Md_T|LINE|L1
APP	chr1	119787147	119787495	349	119787312	10	9.58895	6.47405	5.20978	Intergenic	L1Md_Gf|LINE|L1
APP	chr1	120033167	120033366	200	120033188	7	6.16097	4.73429	2.31281	Intergenic	L1Md_F3|LINE|L1
APP	chr1	122690870	122691123	254	122690953	8	6.88952	5.08983	2.88239	Intergenic	(CA)n|Simple_repeat|Simple_repeat
APP	chr1	124552984	124553285	302	124553087	9	7.27567	5.20324	3.17509	Intergenic	L1Md_T|LINE|L1
APP	chr1	124572880	124573079	200	124572997	6	5.0922	4.1425	1.60528	Intergenic	L1Md_T|LINE|L1
APP	chr1	127033626	127033825	200	127033807	7	5.81683	4.52429	2.11363	Intergenic	L1Md_T|LINE|L1
APP	chr1	128562558	128562764	207	128562638	7	6.16097	4.73429	2.31281	Intron	L1Md_T|LINE|L1		Nckap5	NM_176957;NM_001081756
APP	chr1	131231975	131232211	237	131232124	8	5.45343	4.18148	1.87107	Intron	L1Md_T|LINE|L1		Thsd7b	NM_172485
APP	chr1	132665930	132666179	250	132666016	12	11.5921	7.35197	7.09652	Intergenic	(GAAA)n|Simple_repeat|Simple_repeat		Faim3;Fcamr;Pfkfb2;Yod1;C4bp-ps1;Pigr;AA986860	NM_144960;NM_001170632;NM_011082;NM_026976;NM_008825;NR_027859;NM_177604;NM_001162416;NM_001162415;NR_028304;NM_178691
APP	chr1	132752869	132753151	283	132752954	10	9.63869	6.50345	5.25524	Intergenic	Intergenic		Il19;Fcamr;Faim3;Il20;Pigr;Il24	NM_001170632;NM_011082;NM_026976;NM_021380;NM_144960;NM_053095;NM_001009940
APP	chr1	133204004	133204291	288	133204048	10	7.38071	5.1107	3.24811	Intron	L1Md_T|LINE|L1		Srgap2	NM_001081011
APP	chr1	135491050	135491802	753	135491321	42	19.6014	5.43335	14.9379	Intergenic	Intergenic		Lax1;Zc3h11a;Zbed6;Snrpe	NM_001166552;NM_172842;NM_001159649;NM_144530;NM_001276767;NM_009227
APP	chr1	135492210	135492495	286	135492321	28	9.4844	3.66435	5.11139	Intergenic	Intergenic		Lax1;Zc3h11a;Zbed6;Snrpe	NM_001166552;NM_172842;NM_001159649;NM_144530;NM_001276767;NM_009227
APP	chr1	139424919	139425118	200	139424981	9	7.62344	5.41989	3.46838	Intergenic	L1Md_T|LINE|L1
APP	chr1	140687603	140687802	200	140687616	10	4.52246	3.3286	1.33676	Intergenic	L1Md_T|LINE|L1		2310009B15Rik;Lhx9	NM_010714;NM_001025565;NM_001042577;NM_001081226
APP	chr1	141485157	141485400	244	141485251	12	9.45707	6.03991	5.0882	Intergenic	L1Md_F3|LINE|L1		F13b;Aspm;Cfhr1	NM_015780;NM_031164;NM_009791
APP	chr1	143084188	143084387	200	143084259	8	5.45343	4.18148	1.87107	Intergenic	L1Md_T|LINE|L1
APP	chr1	144554405	144554737	333	144554568	11	10.3617	6.78644	5.92478	Intergenic	L1Md_F|LINE|L1
APP	chr1	144621540	144621739	200	144621668	9	7.27567	5.20324	3.17509	Intergenic	L1Md_T|LINE|L1
APP	chr1	146169927	146170129	203	146170072	12	6.88037	4.45117	2.88239	Intergenic	L1Md_T|LINE|L1		Rgs1	NM_015811
APP	chr1	147100459	147100658	200	147100513	6	5.0922	4.1425	1.60528	Intergenic	L1Md_T|LINE|L1
APP	chr1	147181624	147181823	200	147181704	10	9.1658	6.2209	4.81433	Intergenic	L1_Mur2|LINE|L1
APP	chr1	148294267	148294479	213	148294396	10	7.38071	5.1107	3.24811	Intergenic	L1Md_A|LINE|L1		Brinp3	NM_001145807;NM_153539
APP	chr1	148715799	148716112	314	148715945	12	6.88037	4.45117	2.88239	Intron	L1Md_T|LINE|L1		Brinp3	NM_001145807;NM_153539
APP	chr1	149339004	149339251	248	149339134	18	11.1435	5.74939	6.66708	Intergenic	(TG)n|Simple_repeat|Simple_repeat
APP	chr1	149345630	149345882	253	149345870	7	4.55469	3.71687	1.33676	Intergenic	L1Md_T|LINE|L1
APP	chr1	149519992	149520202	211	149520142	10	8.00362	5.50357	3.78597	Intergenic	L1Md_T|LINE|L1
APP	chr1	150267241	150267440	200	150267317	8	7.28	5.32607	3.17509	Intergenic	(TTTTC)n|Simple_repeat|Simple_repeat
APP	chr1	150367765	150367964	200	150367796	6	5.0922	4.1425	1.60528	Intergenic	L1Md_T|LINE|L1
APP	chr1	150368120	150368449	330	150368254	9	8.44414	5.91786	4.15533	Intergenic	L1Md_T|LINE|L1
APP	chr1	156054133	156054468	336	156054303	16	9.11771	5.02732	4.78474	Intergenic	(TG)n|Simple_repeat|Simple_repeat		4930452N14Rik;4930532M18Rik;Zfp648	NR_108050;NM_001204908;NR_040629
APP	chr1	156054642	156055044	403	156054766	21	10.6304	4.936	6.17926	Intergenic	(TG)n|Simple_repeat|Simple_repeat		4930452N14Rik;4930532M18Rik;Zfp648	NR_108050;NM_001204908;NR_040629
APP	chr1	159330586	159330785	200	159330638	8	7.28	5.32607	3.17509	Intron	intron (NM_177644, intron 1 of 17)		Rasal2	NM_177644
APP	chr1	160810692	160810892	201	160810859	10	7.38071	5.1107	3.24811	Intron	L1Md_T|LINE|L1		Pappa2	NM_001085376
APP	chr1	164199161	164199360	200	164199190	8	6.54678	4.8779	2.62118	Intron	L1Md_A|LINE|L1		Dnm3	NM_001038619;NM_172646
APP	chr1	164753508	164753717	210	164753604	7	6.15349	4.72978	2.31281	Intergenic	L1Md_T|LINE|L1		Prrc2c;Fmo2;Fmo1;Fmo6;Fmo4	NM_010231;NM_144878;NM_001178038;NM_018881;NM_001081290
APP	chr1	170510461	170510660	200	170510604	8	6.88952	5.08983	2.88239	Intergenic	(TG)n|Simple_repeat|Simple_repeat		Mir6348	NR_105766
APP	chr1	171041428	171041627	200	171041485	8	7.0751	5.20285	3.04405	Intergenic	L1Md_A|LINE|L1
APP	chr1	174649626	174650004	379	174649768	8	6.99963	5.15704	2.9808	Intergenic	L1Md_A|LINE|L1		Crp;Dusp23	NM_026725;NM_007768
APP	chr1	175040629	175040844	216	175040751	11	7.05525	4.73099	3.02535	Intergenic	L1Md_F3|LINE|L1		Olfr1406;Olfr218;Olfr1408	NM_146763;NM_001001809;NM_146764
APP	chr1	175722757	175722958	202	175722773	8	6.88952	5.08983	2.88239	Intergenic	L1Md_T|LINE|L1		Ifi204;AI607873;Pydc3;Mndal	NM_001162938;NM_001170853;NM_008329;NM_001204910
APP	chr1	175949633	175949867	235	175949718	11	9.47285	6.24389	5.10036	Intron	L1Md_T|LINE|L1		Ifi205	NM_172648
APP	chr1	177748180	177748379	200	177748315	11	8.40176	5.5753	4.14211	Intergenic	L1Md_T|LINE|L1		Exo1;Wdr64	NM_029453;NM_012012
APP	chr1	180021610	180021809	200	180021699	8	6.88952	5.08983	2.88239	Intergenic	L1Md_F|LINE|L1		Gm16432;Desi2	NM_024282;NM_001034899
APP	chr1	180432613	180432884	272	180432652	8	6.88952	5.08983	2.88239	Intergenic	L1Md_A|LINE|L1		Kif26b;Efcab2	NM_001161665;NM_026626
APP	chr1	185635217	185635487	271	185635366	9	8.44414	5.91786	4.15533	Intergenic	L1Md_A|LINE|L1
APP	chr1	185977589	185977850	262	185977627	7	6.15349	4.72978	2.31281	Intergenic	L1Md_T|LINE|L1		Dusp10	NM_022019
APP	chr1	187932526	187932792	267	187932632	8	7.28	5.32607	3.17509	Intron	L1Md_T|LINE|L1		Lyplal1	NM_146106
APP	chr1	188190102	188190301	200	188190235	6	5.0922	4.1425	1.60528	Intergenic	L1Md_F|LINE|L1
APP	chr1	189639574	189639894	321	189639745	15	11.6323	6.71474	7.13546	Intron	(TG)n|Simple_repeat|Simple_repeat		Esrrg	NM_001243792
APP	chr1	191273056	191273255	200	191273105	8	6.88952	5.08983	2.88239	Intergenic	L1Md_A|LINE|L1		Kcnk2	NM_001281848
APP	chr1	192125613	192125826	214	192125687	17	8.80458	4.6845	4.48918	Intergenic	Intergenic
APP	chr1	194277936	194278143	208	194277964	86	11.5713	2.27396	7.07905	Intron	intron (NM_001038607, intron 10 of 10)		Kcnh1	NM_001038607;NM_010600
APP	chr1	194400351	194400550	200	194400507	9	8.00723	5.65536	3.78597	Intron	L1Md_T|LINE|L1		Hhat	NM_144881
APP	chr1	196576018	196576325	308	196576203	11	8.40176	5.5753	4.14211	Intron	(CA)n|Simple_repeat|Simple_repeat		Plxna2	NM_008882
APP	chr1	196880333	196880580	248	196880483	11	8.40176	5.5753	4.14211	Intron	L1Md_A|LINE|L1		Cd46	NM_010778
APP	chr10	3838505	3838831	327	3838682	8	6.88952	5.08983	2.88239	Intergenic	L1Md_F2|LINE|L1
APP	chr10	4692632	4692831	200	4692673	9	8.44414	5.91786	4.15533	Intergenic	L1Md_F2|LINE|L1		Myct1;Vip	NM_026793;NM_011702
APP	chr10	5510411	5510610	200	5510439	10	6.15787	4.33674	2.31281	Intron	L1Md_A|LINE|L1		Esr1	NM_007956
APP	chr10	8099795	8100010	216	8099963	9	8.00723	5.65536	3.78597	Intron	L1Md_F2|LINE|L1		Ust	NM_177387
APP	chr10	8173904	8174233	330	8174078	15	8.45702	4.84159	4.16663	Intron	(GAA)n|Simple_repeat|Simple_repeat		Ust	NM_177387
APP	chr10	11577450	11577828	379	11577688	11	9.47285	6.24389	5.10036	Intergenic	L1Md_T|LINE|L1
APP	chr10	14785827	14786072	246	14785929	16	13.976	7.89835	9.40697	Intergenic	L1Md_T|LINE|L1
APP	chr10	14916520	14916804	285	14916609	12	6.88037	4.45117	2.88239	Intergenic	L1Md_F2|LINE|L1
APP	chr10	15499220	15499440	221	15499294	8	6.88952	5.08983	2.88239	Intergenic	L1Md_A|LINE|L1
APP	chr10	15614718	15615066	349	15614897	15	9.56811	5.47836	5.19029	Intergenic	L1Md_T|LINE|L1
APP	chr10	16582965	16583164	200	16582997	8	7.28	5.32607	3.17509	Intergenic	GA-rich|Low_complexity|Low_complexity		Gm20125	NR_038020
APP	chr10	19504578	19504777	200	19504709	7	6.16097	4.73429	2.31281	Intergenic	L1Md_T|LINE|L1		Il20ra;Slc35d3;Pex7	NM_029529;NM_172786;NM_001161825;NM_008822
APP	chr10	22159174	22159399	226	22159259	7	6.15349	4.72978	2.31281	Intergenic	L1Md_T|LINE|L1		Raet1a;Gm10825;Raet1c;Raet1b;Raet1d	NM_020030;NR_028580;NM_009018;NM_009017;NM_009016
APP	chr10	22342817	22343016	200	22342898	11	6.0447	4.10877	2.31281	Intergenic	L1Md_A|LINE|L1		Tbpl1;Slc2a12	NM_178934;NM_011603
APP	chr10	27628101	27628408	308	27628211	9	6.95815	5.00325	2.94082	Intergenic	L1Md_T|LINE|L1
APP	chr10	28905882	28906144	263	28906029	9	7.62344	5.41989	3.46838	Intron	L1Md_A|LINE|L1		Soga3	NM_026138
APP	chr10	28964755	28964998	244	28964813	10	9.64919	6.50965	5.25569	Intergenic	L1Md_F2|LINE|L1		9330159F19Rik;Soga3;Echdc1;Rnf146	NM_026518;NM_026138;NM_001162537;NM_025855;NM_001110198;NM_001110197;NM_001110196;NM_001110195;NM_001284279
APP	chr10	29157740	29157939	200	29157859	10	9.64919	6.50965	5.25569	Intergenic	L1Md_A|LINE|L1		Rspo3;Echdc1;Rnf146	NM_026518;NM_028351;NM_001110198;NM_025855;NM_001110197;NM_001110196;NM_001110195;NM_001284279
APP	chr10	29481261	29481460	200	29481327	6	5.0922	4.1425	1.60528	Intergenic	L1_Mm|LINE|L1
APP	chr10	29937938	29938141	204	29938059	9	8.00723	5.65536	3.78597	Intergenic	L1Md_T|LINE|L1		Cenpw	NM_001109747
APP	chr10	30644744	30644971	228	30644867	8	7.27152	5.32101	3.17509	Intergenic	(TG)n|Simple_repeat|Simple_repeat		Hey2	NM_013904
APP	chr10	31581442	31581641	200	31581508	7	6.16097	4.73429	2.31281	Intron	L1Md_F2|LINE|L1		Nkain2	NM_001013411
APP	chr10	31764866	31765085	220	31764913	11	9.08633	6.0039	4.75444	Intron	L1Md_T|LINE|L1		Nkain2	NM_001013411;NM_001025286
APP	chr10	32042794	32042996	203	32042888	8	6.54678	4.8779	2.62118	Intron	L1Md_F2|LINE|L1		Nkain2	NM_001013411;NM_001025286
APP	chr10	33380548	33380755	208	33380590	9	7.62344	5.41989	3.46838	Intergenic	L1Md_F2|LINE|L1		Clvs2	NM_175448
APP	chr10	35072733	35072958	226	35072891	10	6.15787	4.33674	2.31281	Intergenic	L1Md_A|LINE|L1
APP	chr10	35355521	35355874	354	35355564	8	6.23645	4.68292	2.37084	Intergenic	L1Md_T|LINE|L1
APP	chr10	38675364	38675565	202	38675542	9	7.27567	5.20324	3.17509	Intergenic	L1Md_A|LINE|L1		Lama4	NM_010681
APP	chr10	39768787	39768986	200	39768907	7	5.81683	4.52429	2.11363	Intron	L1Md_F3|LINE|L1		Slc16a10	NM_001114332
APP	chr10	43553507	43553706	200	43553657	8	7.28	5.32607	3.17509	Intergenic	RLTR10|LTR|ERVK		Qrsl1;1700027J07Rik;Rtn4ip1	NM_130892;NM_001081054;NR_040581
APP	chr10	46240820	46241107	288	46240928	8	7.28	5.32607	3.17509	Intergenic	L1Md_T|LINE|L1
APP	chr10	46530346	46530637	292	46530454	9	7.62344	5.41989	3.46838	Intergenic	L1Md_T|LINE|L1
APP	chr10	46723399	46723598	200	46723500	6	4.7943	3.95876	1.46767	Intergenic	L1Md_T|LINE|L1
APP	chr10	47524581	47524780	200	47524621	10	7.38071	5.1107	3.24811	Intergenic	L1Md_T|LINE|L1
APP	chr10	47974580	47974846	267	47974674	10	9.1658	6.2209	4.81433	Intergenic	L1Md_Gf|LINE|L1
APP	chr10	48684347	48684554	208	48684472	7	6.15349	4.72978	2.31281	Intergenic	L1VL4|LINE|L1
APP	chr10	49611536	49611763	228	49611654	6	4.7943	3.95876	1.46767	Intergenic	L1Md_F2|LINE|L1
APP	chr10	51219596	51219834	239	51219648	6	5.0922	4.1425	1.60528	Intergenic	L1Md_F2|LINE|L1		Lilrb4;Gp49a;Fam162b	NM_013532;NM_001291892;NM_001291893;NM_001291894;NM_029894;NM_008147
APP	chr10	51858888	51859105	218	51858929	11	10.3617	6.78644	5.92478	Intron	L1Md_A|LINE|L1		Ros1	NM_011282
APP	chr10	53553951	53554271	321	53554106	9	5.29738	3.94249	1.75791	Intergenic	L1Md_F2|LINE|L1		Man1a;Fam184a	NM_001081428;NM_008548
APP	chr10	53938840	53939061	222	53938977	7	5.81683	4.52429	2.11363	Intergenic	L1_Mm|LINE|L1
APP	chr10	54218387	54218586	200	54218475	9	8.44414	5.91786	4.15533	Intergenic	L1Md_A|LINE|L1
APP	chr10	55296133	55296471	339	55296279	10	9.64919	6.50965	5.25569	Intergenic	L1Md_T|LINE|L1
APP	chr10	55455091	55455298	208	55455226	7	5.81683	4.52429	2.11363	Intergenic	L1Md_T|LINE|L1
APP	chr10	56959656	56959903	248	56959855	8	4.47711	3.54824	1.32716	Intergenic	L1Md_A|LINE|L1
APP	chr10	57578200	57578399	200	57578258	8	6.54678	4.8779	2.62118	Intergenic	L1Md_F2|LINE|L1		Fabp7;Smpdl3a	NM_020561;NM_021272
APP	chr10	57692633	57692869	237	57692778	31	8.00646	3.01804	3.78597	Intergenic	TTS (NM_001081954)		Dux;Gm4981;Lims1;Gcc2	NM_027375;NM_026148;NM_001081954;NM_001034869
APP	chr10	58034336	58034555	220	58034473	6	4.7943	3.95876	1.46767	Intron	L1Md_F2|LINE|L1		Ccdc138	NM_001162956
APP	chr10	63188490	63188769	280	63188611	11	9.89567	6.50387	5.48726	Intron	L1Md_T|LINE|L1		Ctnna3	NM_177612;NM_001164376
APP	chr10	64561338	64561725	388	64561516	11	7.05525	4.73099	3.02535	Intergenic	L1Md_A|LINE|L1		Ctnna3	NM_177612;NM_001164376;NM_001164519
APP	chr10	65387092	65387310	219	65387207	12	10.6244	6.76421	6.17349	Intergenic	Lx7|LINE|L1
APP	chr10	65886051	65886277	227	65886167	12	9.45707	6.03991	5.0882	Intergenic	L1Md_F|LINE|L1
APP	chr10	66411726	66412058	333	66411881	13	12.8544	7.91751	8.31498	Intergenic	(CATA)n|Simple_repeat|Simple_repeat		LOC102634101;Reep3	NM_001204915;NR_110511;NM_178606
APP	chr10	68516427	68516728	302	68516575	10	9.1658	6.2209	4.81433	Intergenic	L1Md_T|LINE|L1
APP	chr10	71472721	71472920	200	71472837	9	8.00723	5.65536	3.78597	Intergenic	L1Md_A|LINE|L1		1700049L16Rik	NR_003644
APP	chr10	73229580	73229779	200	73229754	9	6.3968	4.64609	2.49375	Intergenic	L1Md_T|LINE|L1		Pcdh15	NM_001142748;NM_001142741;NM_001142740;NM_001142743;NM_001142742;NM_001142747;NM_001142746;NM_001142760;NM_001142738;NM_001142739;NM_023115;NM_001142735;NM_001142736;NM_001142737
APP	chr10	78747552	78747751	200	78747718	9	6.66638	4.81806	2.73012	Intron	L1Md_F2|LINE|L1		Vmn2r81	NM_175936
APP	chr10	81289812	81290011	200	81289867	8	7.28	5.32607	3.17509	Intergenic	TTS (NM_001142963)		Gm10778;Zfp433;Zfp781	NM_001243067;NM_199062;NM_001142963
APP	chr10	84232149	84232355	207	84232248	10	9.64919	6.50965	5.25569	Intron	intron (NM_001024918, intron 1 of 17)		Rfx4	NM_001024918
APP	chr10	84363069	84363268	200	84363175	9	8.43465	5.91223	4.15533	Intron	(CA)n|Simple_repeat|Simple_repeat		Rfx4	NM_027689;NM_001024918
APP	chr10	85258761	85258960	200	85258855	8	6.23645	4.68292	2.37084	Intergenic	L1Md_F3|LINE|L1		Prdm4;Pwp1	NM_181650;NM_133993
APP	chr10	86532086	86532285	200	86532195	12	11.0848	7.04586	6.61119	Intron	L1Md_T|LINE|L1		1700113H08Rik	NM_029685
APP	chr10	89430442	89430641	200	89430589	8	6.48231	4.83762	2.57615	Intron	L1VL2|LINE|L1		Anks1b	NM_001128086
APP	chr10	89720705	89720904	200	89720825	8	7.28	5.32607	3.17509	Intron	L1_Mm|LINE|L1		Anks1b	NM_001128086
APP	chr10	94055190	94055393	204	94055217	64	10.1962	2.4312	5.7741	Intergenic	MTE2a|LTR|MaLR		Cep83;Mir7211;Cep83os;Tmcc3	NR_015524;NM_177026;NM_029852;NM_172051;NR_106070;NM_001168684
APP	chr10	96272476	96272675	200	96272536	8	7.27152	5.32101	3.17509	Intergenic	Intergenic
APP	chr10	96295344	96295543	200	96295436	8	7.28	5.32607	3.17509	Intergenic	(TTG)n|Simple_repeat|Simple_repeat
APP	chr10	96350899	96351152	254	96351046	11	10.8802	7.09468	6.41806	Intergenic	L1Md_F2|LINE|L1
APP	chr10	97509245	97509444	200	97509346	9	6.66638	4.81806	2.73012	Intergenic	L1Md_A|LINE|L1		Gm10754	NR_033537
APP	chr10	97554060	97554259	200	97554194	7	6.16097	4.73429	2.31281	Intergenic	L1Md_F3|LINE|L1
APP	chr10	97686531	97686749	219	97686627	10	9.1658	6.2209	4.81433	Intergenic	L1Md_F2|LINE|L1		Gm8633	NR_045179
APP	chr10	101239112	101239326	215	101239174	10	9.1658	6.2209	4.81433	Intron	T-rich|Low_complexity|Low_complexity		Mgat4c	NM_001205098
APP	chr10	105644998	105645197	200	105645075	9	6.3968	4.64609	2.49375	Intergenic	L1Md_T|LINE|L1
APP	chr10	108522015	108522391	377	108522101	10	9.1658	6.2209	4.81433	Intergenic	L1Md_T|LINE|L1		Syt1	NM_009306;NM_001252341;NM_001252342
APP	chr10	111743537	111743742	206	111743588	6	5.0922	4.1425	1.60528	Intron	L1Md_T|LINE|L1		Kcnc2	NM_001025581
APP	chr10	112824346	112824565	220	112824476	10	8.74089	5.96188	4.42832	Intergenic	L1Md_A|LINE|L1
APP	chr10	113391794	113391993	200	113391929	13	8.94978	5.51949	4.62623	Intergenic	L1Md_F2|LINE|L1
APP	chr10	113605489	113605693	205	113605533	10	6.15787	4.33674	2.31281	Intergenic	L1Md_T|LINE|L1
APP	chr10	114577931	114578133	203	114577982	10	9.64919	6.50965	5.25569	Intron	(TG)n|Simple_repeat|Simple_repeat		Tph2	NM_173391
APP	chr10	114931527	114931755	229	114931603	17	13.0798	7.09649	8.53414	Intron	(TG)n|Simple_repeat|Simple_repeat		Lgr5	NM_010195
APP	chr10	117423029	117423228	200	117423147	10	9.64919	6.50965	5.25569	Intergenic	(CAACC)n|Simple_repeat|Simple_repeat		4933411E08Rik	NR_045342
APP	chr10	120650192	120650394	203	120650308	7	6.16097	4.73429	2.31281	Intergenic	L1Md_F2|LINE|L1		Tbc1d30	NM_029057
APP	chr10	121144885	121145121	237	121144998	11	7.05525	4.73099	3.02535	Intergenic	L1Md_A|LINE|L1		D930020B18Rik;Srgap1;Xpot;BC048403	NM_001081056;NM_001081037;NM_177335;NM_173022;NM_001242411
APP	chr10	121326369	121326597	229	121326419	12	7.9867	5.12524	3.78597	Intron	(CA)n|Simple_repeat|Simple_repeat		Srgap1	NM_001242411;NM_001081037
APP	chr10	123608057	123608256	200	123608240	10	7.38071	5.1107	3.24811	Intergenic	Intergenic
APP	chr10	124673534	124673733	200	124673704	7	6.16097	4.73429	2.31281	Intron	L1Md_A|LINE|L1		Slc16a7	NM_011391
APP	chr10	125153115	125153333	219	125153147	9	6.14655	4.48597	2.31281	Intergenic	L1Md_A|LINE|L1
APP	chr10	125723794	125724026	233	125723794	7	4.55469	3.71687	1.33676	Intergenic	L1Md_T|LINE|L1
APP	chr10	129742215	129742471	257	129742283	8	7.28	5.32607	3.17509	Intergenic	L1Md_Gf|LINE|L1		Vmn2r84;Tespa1;Olfr827;Neurod4	NM_001081448;NM_183264;NM_146300;NM_007501
APP	chr11	6840199	6840398	200	6840300	8	6.88952	5.08983	2.88239	Intergenic	(CCAA)n|Simple_repeat|Simple_repeat
APP	chr11	10008590	10008917	328	10008815	9	8.00723	5.65536	3.78597	Intergenic	L1_Mus2|LINE|L1
APP	chr11	11046075	11046277	203	11046133	15	10.9626	6.30799	6.49413	Intron	L1Md_T|LINE|L1		Vwc2	NM_177033
APP	chr11	13213919	13214118	200	13214011	7	6.16097	4.73429	2.31281	Intergenic	L1Md_T|LINE|L1
APP	chr11	13517568	13517877	310	13517765	8	5.45343	4.18148	1.87107	Intergenic	L1Md_T|LINE|L1
APP	chr11	13712142	13712359	218	13712275	8	7.28	5.32607	3.17509	Intergenic	L1Md_T|LINE|L1
APP	chr11	14026990	14027297	308	14027157	10	7.38071	5.1107	3.24811	Intergenic	L1Md_T|LINE|L1
APP	chr11	16420158	16420413	256	16420337	11	7.05525	4.73099	3.02535	Intergenic	L1Md_F2|LINE|L1		Sec61g	NM_001109972;NM_001109971;NM_011343
APP	chr11	16458442	16458665	224	16458540	10	6.15787	4.33674	2.31281	Intergenic	(TG)n|Simple_repeat|Simple_repeat		Sec61g	NM_001109972;NM_001109971;NM_011343
APP	chr11	18539578	18539783	206	18539721	8	7.28	5.32607	3.17509	Intergenic	L1Md_T|LINE|L1
APP	chr11	20269288	20269503	216	20269353	9	8.44414	5.91786	4.15533	Intergenic	RLTR24|LTR|ERV1		Slc1a4	NM_018861
APP	chr11	24710009	24710229	221	24710089	7	5.81683	4.52429	2.11363	Intergenic	L1Md_T|LINE|L1		Gm10466	NR_033491
APP	chr11	26801719	26801918	200	26801754	9	6.3968	4.64609	2.49375	Intergenic	L1_Mus2|LINE|L1
APP	chr11	27477916	27478156	241	27478063	10	8.00362	5.50357	3.78597	Intergenic	L1Md_A|LINE|L1
APP	chr11	28874346	28874545	200	28874431	9	8.44414	5.91786	4.15533	Intergenic	L1Md_F2|LINE|L1		Efemp1	NM_146015
APP	chr11	28968301	28968533	233	28968386	8	5.45343	4.18148	1.87107	Intergenic	L1Md_F3|LINE|L1		Pnpt1	NM_027869
APP	chr11	29025210	29025493	284	29025304	9	6.3968	4.64609	2.49375	Intergenic	IAPEz-int|LTR|ERVK		Pnpt1;Ccdc104;Smek2	NM_134034;NM_027869;NM_025740
APP	chr11	29230438	29230640	203	29230506	11	7.05525	4.73099	3.02535	Intergenic	L1Md_T|LINE|L1		Ccdc88a;Ccdc104	NM_176841;NM_025740
APP	chr11	29340446	29340717	272	29340568	13	11.3522	7.00454	6.86788	Intron	L1Md_T|LINE|L1		Ccdc88a	NM_176841
APP	chr11	29971995	29972299	305	29972272	7	4.76514	3.85445	1.46767	Intergenic	L1Md_F2|LINE|L1		Eml6;Sptbn1	NM_009260;NM_146016;NM_175836
APP	chr11	32971003	32971272	270	32971123	15	12.8054	7.43374	8.26814	Intergenic	(CA)n|Simple_repeat|Simple_repeat		Fgf18;Npm1	NR_102395;NM_001252261;NM_008722;NM_001252260;NM_008005
APP	chr11	40048612	40048878	267	40048708	9	8.44414	5.91786	4.15533	Intergenic	L1Md_A|LINE|L1
APP	chr11	40620324	40620523	200	40620447	7	5.72295	4.46608	2.09841	Intergenic	L1Md_T|LINE|L1		Hmmr;Nudcd2;Ccng1	NM_009831;NM_001290697;NM_026023;NM_013552
APP	chr11	40782466	40782665	200	40782570	6	5.0922	4.1425	1.60528	Intergenic	L1Md_T|LINE|L1
APP	chr11	41372835	41373186	352	41373023	11	10.3617	6.78644	5.92478	Intergenic	L1Md_T|LINE|L1
APP	chr11	41706614	41706991	378	41706923	7	5.81683	4.52429	2.11363	Intergenic	L1Md_F|LINE|L1		Gabrg2	NM_008073;NM_177408
APP	chr11	42897122	42897325	204	42897217	8	4.82975	3.77704	1.50038	Intergenic	L1Md_A|LINE|L1		Atp10b	NM_176999
APP	chr11	44121393	44121638	246	44121470	8	5.45343	4.18148	1.87107	Intergenic	L1Md_T|LINE|L1		Il12b	NM_008352
APP	chr11	44169199	44169425	227	44169313	8	6.88952	5.08983	2.88239	Intergenic	B4A|SINE|B4		Il12b;Ublcp1	NM_008352;NM_024475
APP	chr11	46416604	46417038	435	46416668	10	8.00362	5.50357	3.78597	Intergenic	L1Md_A|LINE|L1		Timd2;BC053393;Gm4926;Dppa1;Gm12169;Gm12171	NM_134249;NM_001161355;NR_028066;NM_001161356;NM_178247;NM_001163358;NM_001163357;NM_001163353;NM_001025435
APP	chr11	47280769	47280987	219	47280902	11	10.3617	6.78644	5.92478	Intergenic	L1Md_T|LINE|L1		Sgcd	NM_011891
APP	chr11	48138960	48139231	272	48139045	10	7.38071	5.1107	3.24811	Intergenic	L1Md_A|LINE|L1
APP	chr11	48139289	48139607	319	48139476	11	9.89567	6.50387	5.48726	Intergenic	L1Md_A|LINE|L1
APP	chr11	48534975	48535248	274	48535135	8	6.88952	5.08983	2.88239	Intergenic	L1Md_T|LINE|L1		Gnb2l1;Snord95;Snord96a;Trim41	NR_028563;NM_145377;NM_008143;NR_028564
APP	chr11	48837618	48837849	232	48837784	6	5.0922	4.1425	1.60528	Intergenic	L1Md_F3|LINE|L1		9930111J21Rik2;9930111J21Rik1;Tgtp1;Tgtp2;Olfr1396;Gm12185;Olfr56;Ifi47;Psme2b	NM_001114679;NM_008330;NM_011579;NM_001045540;NM_173434;NM_010999;NM_001271677;NM_001271676;NM_001281472;NM_001145164;NM_146337
APP	chr11	52289720	52289973	254	52289733	6	5.0922	4.1425	1.60528	Intergenic	B1_Mus2|SINE|Alu		Vdac1;9530068E07Rik	NM_011694;NM_153117
APP	chr11	58489648	58489903	256	58489726	9	6.3968	4.64609	2.49375	Intergenic	L1Md_A|LINE|L1		Olfr316;Olfr317;Olfr325;Olfr324;Olfr320;Olfr323;Olfr322;Olfr318;Trim58;Olfr319;2210407C18Rik	NM_001039047;NM_001011769;NM_001011818;NM_146376;NM_001011743;NM_207230;NM_207693;NM_207153;NM_144544;NM_146501;NM_146500
APP	chr11	58490327	58490708	382	58490548	9	8.44414	5.91786	4.15533	Intergenic	L1Md_A|LINE|L1		Olfr316;Olfr317;Olfr325;Olfr324;Olfr320;Olfr323;Olfr322;Olfr318;Trim58;Olfr319;2210407C18Rik	NM_001039047;NM_001011769;NM_001011818;NM_146376;NM_001011743;NM_207230;NM_207693;NM_207153;NM_144544;NM_146501;NM_146500
APP	chr11	58518326	58518525	200	58518422	7	6.15349	4.72978	2.31281	Intergenic	L1Md_F2|LINE|L1		Olfr314;Olfr315;Olfr316;Olfr317;Olfr318;Olfr319;Olfr320;Olfr323;Olfr322;Trim58;Fam183b;2210407C18Rik	NM_001039047;NM_001011769;NM_001011818;NM_207230;NM_001011760;NM_146538;NM_029283;NM_207693;NM_146376;NM_144544;NM_146501;NM_146500;NM_001162878
APP	chr11	61408218	61408449	232	61408269	7	6.16097	4.73429	2.31281	Intergenic	RLTR10-int|LTR|ERVK		Grap;Slc5a10;Fam83g;B9d1;Epn2	NM_027817;NM_178618;NM_001033227;NM_010148;NM_013717;NM_001252189;NM_001252188
APP	chr11	62786159	62786389	231	62786312	9	8.44414	5.91786	4.15533	Intron	L1Md_A|LINE|L1		Cdrt4	NM_025496
APP	chr11	62787154	62787353	200	62787293	8	7.28	5.32607	3.17509	Intron	L1Md_A|LINE|L1		Cdrt4	NM_025496
APP	chr11	63617466	63617730	265	63617541	10	9.1658	6.2209	4.81433	Intergenic	L1Md_T|LINE|L1		Hs3st3b1	NM_018805
APP	chr11	66287669	66287868	200	66287763	8	4.47711	3.54824	1.32716	Intron	L1Md_A|LINE|L1		Shisa6	NM_001034874
APP	chr11	69784553	69784752	200	69784569	10	9.64919	6.50965	5.25569	Intron	B2_Mm1a|SINE|B2		Elp5	NM_018740;NM_001253700
APP	chr11	70900926	70901198	273	70901019	11	8.40176	5.5753	4.14211	Intergenic	L1Md_T|LINE|L1		Nlrp1a;Nlrp1b;6330403K07Rik;Derl2;Mis12;Dhx33	NM_001040696;NM_025993;NM_001004142;NM_134022;NM_178367;NM_001162414;NM_001291146;NM_001291148;NM_033562;NM_001291147
APP	chr11	71023129	71023353	225	71023247	8	6.54678	4.8779	2.62118	Intron	L1_Mus1|LINE|L1		Nlrp1b	NM_001040696
APP	chr11	73460746	73460945	200	73460804	10	8.00362	5.50357	3.78597	Intergenic	L1Md_T|LINE|L1		Zfp735;Olfr385;Olfr384	NM_147023;NM_207224;NM_001126489
APP	chr11	73678208	73678517	310	73678376	11	10.3617	6.78644	5.92478	Intergenic	L1Md_T|LINE|L1		Olfr389;Olfr390;Olfr392;Olfr393;Olfr394;Olfr395;Olfr397;Olfr391-ps;Olfr23	NM_147009;NM_147008;NM_147005;NM_147007;NM_147006;NM_010970;NM_146347;NM_146346;NM_001159775
APP	chr11	75232705	75232946	242	75232773	10	9.64919	6.50965	5.25569	Intron	(TATAG)n|Simple_repeat|Simple_repeat		Serpinf1	NM_011340
APP	chr11	81246044	81246243	200	81246063	10	6.15787	4.33674	2.31281	Intron	L1Md_A|LINE|L1		Asic2	NM_001034013
APP	chr11	88943147	88943371	225	88943189	54	15.279	3.52645	10.6812	Intron	(CTGTG)n|Simple_repeat|Simple_repeat		Gm525	NM_001033266
APP	chr11	93661581	93661855	275	93661678	8	7.28	5.32607	3.17509	Intergenic	L1Md_F|LINE|L1		Utp18;Mbtd1	NM_001013375;NM_134012
APP	chr11	104673877	104674119	243	104674027	8	7.28	5.32607	3.17509	Intergenic	L1Md_F3|LINE|L1
APP	chr11	105949423	105949768	346	105949614	9	6.3968	4.64609	2.49375	Intron	B3A|SINE|B2		Map3k3	NM_011947
APP	chr11	110655669	110655923	255	110655831	13	7.74751	4.79357	3.58134	Intergenic	L1Md_A|LINE|L1
APP	chr11	112668252	112668469	218	112668354	12	9.45707	6.03991	5.0882	Intergenic	(TG)n|Simple_repeat|Simple_repeat		Sox9;BC006965	NM_011448;NR_024085
APP	chr11	121843563	121843856	294	121843733	164	14.5169	1.94719	9.93602	Intergenic	(TTAGGG)n|Simple_repeat|Simple_repeat
APP	chr12	3033532	3033731	200	3033553	8	5.45343	4.18148	1.87107	Intergenic	L1VL4|LINE|L1
APP	chr12	3542643	3542842	200	3542650	12	9.45707	6.03991	5.0882	Intergenic	Intergenic		Asxl2;Dtnb	NM_001162465;NM_001270988;NM_172421;NR_027870;NR_027869;NM_007886
APP	chr12	6779597	6779833	237	6779776	12	11.5921	7.35197	7.09652	Intergenic	L1Md_A|LINE|L1
APP	chr12	7284938	7285147	210	7285066	8	7.27152	5.32101	3.17509	Intergenic	L1Md_F2|LINE|L1		1700101O22Rik	NR_045045
APP	chr12	7810241	7810480	240	7810367	8	6.88952	5.08983	2.88239	Intergenic	L1Md_T|LINE|L1
APP	chr12	10836951	10837300	350	10837134	9	6.3968	4.64609	2.49375	Intergenic	L1Md_T|LINE|L1
APP	chr12	11564348	11564547	200	11564498	7	5.81683	4.52429	2.11363	Intergenic	L1Md_F2|LINE|L1		Rad51ap2	NM_001111118
APP	chr12	11599848	11600400	553	11600386	8	7.28	5.32607	3.17509	Intergenic	L1Md_F2|LINE|L1
APP	chr12	11984588	11984787	200	11984622	9	8.44414	5.91786	4.15533	Intergenic	L1_Mm|LINE|L1		Tubb2a-ps2	NR_003964
APP	chr12	13430763	13430992	230	13430931	7	6.16097	4.73429	2.31281	Intron	L1Md_T|LINE|L1		Nbas	NM_027706
APP	chr12	14967099	14967364	266	14967268	7	6.16097	4.73429	2.31281	Intergenic	L1Md_T|LINE|L1		4930448C13Rik	NR_045960
APP	chr12	15066505	15066737	233	15066582	8	5.02354	3.90287	1.60528	Intergenic	L1Md_T|LINE|L1		4930448C13Rik	NR_045960
APP	chr12	15067186	15067473	288	15067284	12	9.45707	6.03991	5.0882	Intergenic	L1Md_T|LINE|L1		4930448C13Rik	NR_045960
APP	chr12	15264823	15265149	327	15265014	11	6.0447	4.10877	2.31281	Intergenic	L1Md_A|LINE|L1
APP	chr12	15431998	15432212	215	15432105	13	9.52851	5.8754	5.15322	Intergenic	L1Md_T|LINE|L1
APP	chr12	15490937	15491141	205	15491057	6	5.0922	4.1425	1.60528	Intergenic	L1Md_F|LINE|L1
APP	chr12	17829951	17830181	231	17830046	8	7.28	5.32607	3.17509	Intergenic	L1Md_T|LINE|L1		Hpcal1	NM_016677
APP	chr12	18128130	18128392	263	18128297	8	7.28	5.32607	3.17509	Intergenic	Intergenic
APP	chr12	19281100	19281347	248	19281268	6	5.0922	4.1425	1.60528	Intergenic	Intergenic
APP	chr12	20094457	20094696	240	20094601	8	7.28	5.32607	3.17509	Intergenic	L1_Mur3|LINE|L1
APP	chr12	20531710	20531920	211	20531754	7	5.81683	4.52429	2.11363	Intergenic	(CA)n|Simple_repeat|Simple_repeat
APP	chr12	21672485	21672725	241	21672646	8	5.23085	4.03737	1.72298	Intergenic	(TG)n|Simple_repeat|Simple_repeat
APP	chr12	22494457	22494656	200	22494519	9	8.44414	5.91786	4.15533	Intergenic	L1Md_A|LINE|L1
APP	chr12	22859422	22859717	296	22859482	11	7.05525	4.73099	3.02535	Intergenic	(CA)n|Simple_repeat|Simple_repeat
APP	chr12	23386366	23386565	200	23386421	7	6.16097	4.73429	2.31281	Intergenic	Intergenic
APP	chr12	23743270	23743691	422	23743445	11	6.0447	4.10877	2.31281	Intergenic	L1Md_T|LINE|L1
APP	chr12	24846549	24846797	249	24846671	8	7.28	5.32607	3.17509	Intergenic	L1Md_F|LINE|L1		9030624G23Rik	NM_001256489
APP	chr12	26735136	26735525	390	26735439	8	6.54678	4.8779	2.62118	Intergenic	L1Md_T|LINE|L1
APP	chr12	29214432	29214755	324	29214605	9	8.00723	5.65536	3.78597	Intron	(TG)n|Simple_repeat|Simple_repeat		Dcdc2c	NM_001177964
APP	chr12	31370649	31370867	219	31370778	11	8.40176	5.5753	4.14211	Intergenic	L1Md_T|LINE|L1		Tmem18	NM_172049
APP	chr12	31661422	31661621	200	31661556	9	8.00723	5.65536	3.78597	Intergenic	L1Md_F2|LINE|L1		Sh3yl1;Acp1;Fam110c;Fam150b	NM_001289480;NM_027828;NM_021330;NM_001159743;NR_110343;NM_013709;NM_001110239
APP	chr12	33096727	33096929	203	33096755	9	7.27567	5.20324	3.17509	Intergenic	L1Md_A|LINE|L1		Ccdc71l	NM_001162903
APP	chr12	33221742	33222044	303	33221879	8	7.28	5.32607	3.17509	Intergenic	L1Md_A|LINE|L1
APP	chr12	34147236	34147435	200	34147355	11	8.40176	5.5753	4.14211	Intergenic	L1Md_F2|LINE|L1		Efcab10;Twistnb;Atxn7l1	NM_001033436;NM_029152;NM_172253
APP	chr12	36591343	36591595	253	36591489	7	6.16097	4.73429	2.31281	Intergenic	L1Md_A|LINE|L1		Agr3	NM_207531
APP	chr12	38258630	38259080	451	38258742	10	8.35562	5.72357	4.11055	Intron	L1Md_F2|LINE|L1		Agmo	NM_178767
APP	chr12	40266283	40266575	293	40266431	12	11.5921	7.35197	7.09652	Intergenic	L1Md_A|LINE|L1
APP	chr12	40349782	40349981	200	40349938	9	8.44414	5.91786	4.15533	Intergenic	L1Md_Gf|LINE|L1
APP	chr12	43344161	43344362	202	43344181	11	7.05525	4.73099	3.02535	Intergenic	L1Md_A|LINE|L1
APP	chr12	43350754	43351031	278	43350933	11	7.05525	4.73099	3.02535	Intergenic	(CA)n|Simple_repeat|Simple_repeat
APP	chr12	43923881	43924080	200	43924016	10	7.38071	5.1107	3.24811	Intergenic	L1Md_A|LINE|L1
APP	chr12	44759909	44760144	236	44760059	11	5.24649	3.63119	1.72439	Intergenic	L1Md_A|LINE|L1
APP	chr12	44851411	44851636	226	44851452	10	8.35562	5.72357	4.11055	Intergenic	L1Md_T|LINE|L1
APP	chr12	45836622	45836833	212	45836770	10	7.38071	5.1107	3.24811	Intergenic	L1Md_T|LINE|L1
APP	chr12	46859400	46859599	200	46859522	6	5.08572	4.13856	1.60528	Intergenic	L1Md_F2|LINE|L1
APP	chr12	47146908	47147164	257	47147008	7	6.16097	4.73429	2.31281	Intergenic	L1Md_A|LINE|L1
APP	chr12	48963445	48963791	347	48963606	8	6.54678	4.8779	2.62118	Intergenic	L1Md_A|LINE|L1
APP	chr12	49153705	49154029	325	49153823	10	8.74089	5.96188	4.42832	Intergenic	L1Md_T|LINE|L1
APP	chr12	49619978	49620177	200	49620092	10	9.1658	6.2209	4.81433	Intergenic	L1Md_A|LINE|L1
APP	chr12	50350782	50350981	200	50350792	9	5.29738	3.94249	1.75791	Intergenic	L1Md_T|LINE|L1
APP	chr12	50798189	50798422	234	50798234	12	6.00417	3.93379	2.28002	Intergenic	L1Md_A|LINE|L1
APP	chr12	51505383	51505775	393	51505581	9	8.00723	5.65536	3.78597	Intron	L1Md_F|LINE|L1		Prkd1	NM_008858
APP	chr12	52270421	52270798	378	52270540	10	8.74089	5.96188	4.42832	Intergenic	L1Md_T|LINE|L1
APP	chr12	53697276	53697475	200	53697400	7	6.16097	4.73429	2.31281	Intergenic	Intergenic		Arhgap5;1700031P21Rik	NR_045910;NM_009706
APP	chr12	54371523	54371840	318	54371697	10	7.38071	5.1107	3.24811	Intron	(TAGTG)n|Simple_repeat|Simple_repeat		Npas3	NM_013780
APP	chr12	57374134	57374333	200	57374164	9	6.3968	4.64609	2.49375	Intergenic	(TTTC)n|Simple_repeat|Simple_repeat		Gm19990;Mbip	NR_045048;NM_145442
APP	chr12	57926883	57927096	214	57927020	13	6.79314	4.23639	2.84948	Intron	(TTCTC)n|Simple_repeat|Simple_repeat		Slc25a21	NM_001167976;NM_172577
APP	chr12	58119264	58119463	200	58119331	7	5.81683	4.52429	2.11363	Intron	(TG)n|Simple_repeat|Simple_repeat		Slc25a21	NM_001167976;NM_172577
APP	chr12	59015473	59015672	200	59015560	10	9.63869	6.50345	5.25524	Intergenic	L1Md_A|LINE|L1
APP	chr12	59604381	59604580	200	59604408	7	6.16097	4.73429	2.31281	Intergenic	(GAAA)n|Simple_repeat|Simple_repeat
APP	chr12	59960142	59960341	200	59960186	9	5.29738	3.94249	1.75791	Intergenic	L1Md_A|LINE|L1		Sec23a	NM_009147
APP	chr12	60139264	60139504	241	60139391	9	8.44414	5.91786	4.15533	Intergenic	B2_Mm2|SINE|B2		Sec23a;Gemin2;Pnn;Ctage5;Trappc6b;Mia2	NM_009147;NM_008891;NM_146034;NM_001165253;NM_001165254;NM_177321;NM_030057;NM_025656
APP	chr12	60371918	60372127	210	60371976	8	7.28	5.32607	3.17509	Intergenic	L1Md_T|LINE|L1		Ctage5;Fbxo33	NM_001033156;NM_001165253;NM_001165254;NM_146034
APP	chr12	62475546	62475775	230	62475578	8	4.47711	3.54824	1.32716	Intergenic	L1Md_F|LINE|L1
APP	chr12	63268366	63268608	243	63268509	9	8.00723	5.65536	3.78597	Intergenic	L1Md_F3|LINE|L1
APP	chr12	63647293	63647492	200	63647358	10	6.15787	4.33674	2.31281	Intergenic	L1Md_T|LINE|L1
APP	chr12	64080414	64080659	246	64080471	6	5.0922	4.1425	1.60528	Intergenic	L1Md_A|LINE|L1
APP	chr12	65454576	65454775	200	65454630	9	8.44414	5.91786	4.15533	Intergenic	polypurine|Low_complexity|Low_complexity
APP	chr12	65989705	65989978	274	65989841	8	5.45343	4.18148	1.87107	Intergenic	L1Md_A|LINE|L1		Gm527;Fam179b;Klhl28	NM_001025605;NM_025707;NM_177805
APP	chr12	68381113	68381337	225	68381197	9	5.29738	3.94249	1.75791	Intergenic	L1Md_A|LINE|L1		Mdga2	NM_001193266;NM_207010
APP	chr12	69054784	69055026	243	69054854	7	5.81683	4.52429	2.11363	Intergenic	Intergenic
APP	chr12	69548943	69549148	206	69549039	7	6.16097	4.73429	2.31281	Intergenic	L1Md_F|LINE|L1
APP	chr12	71153121	71153328	208	71153259	8	5.45343	4.18148	1.87107	Intron	GA-rich|Low_complexity|Low_complexity		Nin	NR_104398;NM_001286079;NR_104397;NM_001081453;NM_008697;NM_001286080
APP	chr12	73991519	73991718	200	73991662	12	9.45707	6.03991	5.0882	Intron	(CCAA)n|Simple_repeat|Simple_repeat		4930447C04Rik	NM_029444
APP	chr12	77861127	77861500	374	77861467	7	5.81683	4.52429	2.11363	Intergenic	MERVL-int|LTR|ERVL		Gpx2;Sptb;Rab15;Fntb;Churc1	NM_030677;NM_013675;NM_206534;NM_134050;NM_145927
APP	chr12	78488920	78489219	300	78489111	12	11.5921	7.35197	7.09652	Promoter	promoter-TSS (NM_001252615)		Fut8	NM_001252615
APP	chr12	78873687	78873886	200	78873719	7	6.16097	4.73429	2.31281	Intergenic	L1Md_T|LINE|L1
APP	chr12	78874510	78874721	212	78874579	9	7.62344	5.41989	3.46838	Intergenic	L1Md_T|LINE|L1
APP	chr12	83738957	83739156	200	83739048	9	8.44414	5.91786	4.15533	Intron	L1Md_T|LINE|L1		Rgs6	NM_001282061;NM_015812
APP	chr12	88935908	88936107	200	88935990	8	6.88952	5.08983	2.88239	Intergenic	L1Md_T|LINE|L1		Gm16381;Gm4027;Gm8300;Oog1	NM_001177565;NM_001177564;NM_001166062;NM_178657
APP	chr12	88971743	88971942	200	88971915	8	5.45343	4.18148	1.87107	Intergenic	L1_Mm|LINE|L1		BB287469;Gm16381;Gm4027;Oog1	NM_001177564;NM_001166062;NM_178657;NM_001177573
APP	chr12	89152375	89152652	278	89152531	7	5.24211	4.16259	1.72298	Intergenic	L1_Mm|LINE|L1		BB287469;Gm2016;Gm2022;Gm2042;Gm1995	NM_001177573;NM_001270792;NM_001270793;NM_001177574;NR_033562;NM_001122662
APP	chr12	89383158	89383405	248	89383300	11	7.05525	4.73099	3.02535	Intron	L1Md_Gf|LINE|L1		Gm21319	NM_001270722
APP	chr12	91716724	91716924	201	91716769	10	7.38071	5.1107	3.24811	Intergenic	L1Md_A|LINE|L1
APP	chr12	92473892	92474227	336	92474065	14	14.8161	8.87679	10.2281	Intron	intron (NM_181815, intron 17 of 25)		Cep128;Bc1	NM_181815;NR_038088
APP	chr12	92480331	92480689	359	92480427	11	8.096	5.38316	3.86852	Intron	L1Md_F2|LINE|L1		Cep128;Bc1	NM_181815;NR_038088
APP	chr12	92708581	92708780	200	92708725	6	5.0922	4.1425	1.60528	Intron	L1Md_T|LINE|L1		Tshr;Bc1	NM_001113404;NM_011648;NR_038088
APP	chr12	93985691	93985890	200	93985771	9	8.00723	5.65536	3.78597	Intergenic	L1Md_A|LINE|L1
APP	chr12	94827531	94827761	231	94827730	10	6.15787	4.33674	2.31281	Intergenic	L1Md_T|LINE|L1
APP	chr12	95160325	95160546	222	95160463	12	10.6244	6.76421	6.17349	Intergenic	L1Md_A|LINE|L1
APP	chr12	97063338	97063603	266	97063445	10	8.74089	5.96188	4.42832	Intergenic	L1Md_Gf|LINE|L1		Flrt2	NM_201518
APP	chr12	97752052	97752253	202	97752162	8	7.27152	5.32101	3.17509	Intergenic	L1Md_T|LINE|L1
APP	chr12	98614331	98614530	200	98614423	7	6.16097	4.73429	2.31281	Intergenic	Intergenic
APP	chr12	98913029	98913228	200	98913185	8	5.23085	4.03737	1.72298	Intergenic	L1Md_T|LINE|L1
APP	chr12	100384631	100384850	220	100384783	11	10.3617	6.78644	5.92478	Intergenic	L1Md_T|LINE|L1		Foxn3;4930474N09Rik	NM_183186;NR_038130
APP	chr12	102588872	102589099	228	102588990	9	7.27567	5.20324	3.17509	Intergenic	L1Md_T|LINE|L1		Catsperb	NM_173023
APP	chr12	104704706	104704905	200	104704810	7	5.81683	4.52429	2.11363	Intergenic	L1Md_A|LINE|L1		Ddx24;Ppp4r4;Ifi27;Ifi27l2b;Ifi27l2a;Otub2	NM_026790;NR_033587;NM_026580;NM_029803;NM_145449;NM_001159502;NM_028980;NM_001281830;NM_194068;NM_194066;NM_194067;NM_020494;NM_001177841;NM_194069
APP	chr12	104875654	104875901	248	104875784	8	7.28	5.32607	3.17509	Intergenic	(TTCC)n|Simple_repeat|Simple_repeat		Ppp4r4;Serpina1b;Serpina10;Serpina1f;Serpina6	NM_007618;NM_144834;NM_026687;NM_001164742;NM_009244;NM_028980
APP	chr12	105018700	105018955	256	105018824	12	11.5921	7.35197	7.09652	Intergenic	L1Md_T|LINE|L1		Serpina1b;Serpina1a;Serpina1f;Serpina1d	NM_001252569;NM_009243;NM_026687;NM_001164742;NM_009246;NM_009244
APP	chr12	105441562	105441806	245	105441611	6	5.0922	4.1425	1.60528	Intergenic	L1Md_T|LINE|L1		Serpina3h;Serpina3i;Serpina5;Serpina3a;Serpina3b;Serpina3c;Serpina3f;Serpina3g	NM_001033335;NR_033450;NM_173024;NM_001168295;NM_001168294;NM_172953;NM_009251;NM_008458;NM_028740;NM_001199940;NM_001167705
APP	chr12	108797143	108797422	280	108797271	10	9.63869	6.50345	5.25524	Intergenic	(GAAA)n|Simple_repeat|Simple_repeat
APP	chr12	109810041	109810337	297	109810184	11	7.05525	4.73099	3.02535	Intron	L1Md_T|LINE|L1		Evl	NM_007965;NM_001163394
APP	chr12	110000768	110000967	200	110000877	9	8.44414	5.91786	4.15533	Intergenic	(GAA)n|Simple_repeat|Simple_repeat		Degs2;Yy1;Slc25a47;Wars;Evl;Slc25a29;Mir345	NM_011710;NM_001171002;NR_029773;NM_027299;NM_001164314;NM_001012310;NM_001164488;NM_009537;NM_181328;NM_007965;NM_001163396;NM_001163395;NM_001163394
APP	chr12	111140867	111141066	200	111140999	8	7.28	5.32607	3.17509	Intergenic	IAPEz-int|LTR|ERVK
APP	chr12	115109807	115110090	284	115109987	8	5.45343	4.18148	1.87107	Intergenic	L1Md_F3|LINE|L1
APP	chr12	119409279	119409501	223	119409382	9	8.00723	5.65536	3.78597	Intron	Lx4A|LINE|L1		Dnah11	NM_010060
APP	chr12	120365483	120365854	372	120365628	8	5.6934	4.33625	2.07152	Intergenic	L1Md_F2|LINE|L1		Itgb8	NM_177290
APP	chr12	120757412	120757704	293	120757507	9	6.66638	4.81806	2.73012	Intergenic	L1Md_T|LINE|L1		Macc1	NM_001163136
APP	chr13	3204418	3204617	200	3204583	7	6.16097	4.73429	2.31281	Intergenic	L1_Mur2|LINE|L1		Speer6-ps1	NR_001581
APP	chr13	3209514	3209725	212	3209607	8	6.23645	4.68292	2.37084	Intergenic	L1Md_F2|LINE|L1		Speer6-ps1	NR_001581
APP	chr13	4092262	4092461	200	4092355	7	4.55469	3.71687	1.33676	Intergenic	L1_Mus2|LINE|L1		Akr1c14;Akr1c13;Akr1c18	NM_134072;NM_013778;NM_134066
APP	chr13	5503318	5503532	215	5503429	10	4.52246	3.3286	1.33676	Intergenic	L1Md_A|LINE|L1
APP	chr13	6726263	6726462	200	6726385	9	8.43465	5.91223	4.15533	Intergenic	L1Md_A|LINE|L1		Pfkp	NM_001291071;NM_019703
APP	chr13	7053316	7053557	242	7053457	10	6.15787	4.33674	2.31281	Intergenic	L1Md_F2|LINE|L1
APP	chr13	7225804	7226003	200	7225864	8	6.88952	5.08983	2.88239	Intergenic	L1Md_F2|LINE|L1
APP	chr13	8001439	8001716	278	8001619	10	7.38071	5.1107	3.24811	Intergenic	L1Md_F2|LINE|L1
APP	chr13	8169439	8169675	237	8169557	11	8.096	5.38316	3.86852	Intergenic	L1Md_T|LINE|L1		Adarb2	NM_001289530;NR_110345;NM_052977
APP	chr13	11592347	11592628	282	11592473	10	9.64919	6.50965	5.25569	Intergenic	L1Md_F2|LINE|L1		Zp4-ps;Ryr2	NR_027813;NM_023868
APP	chr13	13401399	13401680	282	13401526	12	11.5921	7.35197	7.09652	Intergenic	L1Md_A|LINE|L1		Gpr137b	NM_031999
APP	chr13	13996751	13997092	342	13996917	11	10.8917	7.10143	6.42636	Intergenic	L1Md_F|LINE|L1		Gng4;B3galnt2;Tbce	NM_178640;NM_010317;NM_178337
APP	chr13	14494737	14494978	242	14494796	9	7.62344	5.41989	3.46838	Intron	L1Md_F|LINE|L1		Hecw1	NM_001081348
APP	chr13	14659493	14659744	252	14659621	7	6.15349	4.72978	2.31281	Intergenic	L1Md_T|LINE|L1		Psma2;Mrpl32;Hecw1;AW209491	NM_001104646;NM_008944;NM_029271;NM_134067;NM_001081348
APP	chr13	14667075	14667274	200	14667175	11	10.3617	6.78644	5.92478	Intergenic	L1_Mur1|LINE|L1		Psma2;Mrpl32;Hecw1;AW209491	NM_001104646;NM_008944;NM_029271;NM_134067;NM_001081348
APP	chr13	15347350	15347549	200	15347369	6	5.0922	4.1425	1.60528	Intergenic	L1Md_T|LINE|L1
APP	chr13	16059002	16059266	265	16059180	11	8.40176	5.5753	4.14211	Intergenic	L1Md_T|LINE|L1		Inhba	NM_008380
APP	chr13	16695429	16695696	268	16695614	7	4.55469	3.71687	1.33676	Intergenic	L1Md_T|LINE|L1
APP	chr13	17441298	17441497	200	17441403	7	6.16097	4.73429	2.31281	Intron	(CA)n|Simple_repeat|Simple_repeat		Sugct	NM_138654
APP	chr13	18781114	18781390	277	18781297	12	9.45707	6.03991	5.0882	Intergenic	L1Md_T|LINE|L1		Vps41	NM_172120
APP	chr13	19319551	19319756	206	19319645	8	7.28	5.32607	3.17509	Intergenic	L1Md_F2|LINE|L1		Amph	NM_001289546;NM_175007
APP	chr13	23506224	23506423	200	23506288	7	6.16097	4.73429	2.31281	Intergenic	Intergenic		Abt1;C230035I16Rik;Btn1a1;Btn2a2;Zfp322a	NM_013483;NM_172586;NM_001289614;NM_013924;NM_001286155;NM_001289615;NM_175938;NM_001111107;NM_001286156;NR_015492
APP	chr13	26537195	26537394	200	26537366	7	6.16097	4.73429	2.31281	Intergenic	L1Md_T|LINE|L1
APP	chr13	26634941	26635200	260	26635047	10	8.74089	5.96188	4.42832	Intergenic	L1Md_T|LINE|L1
APP	chr13	28076661	28076880	220	28076771	9	6.3968	4.64609	2.49375	Intergenic	L1Md_T|LINE|L1		Prl4a1	NM_011165
APP	chr13	28287348	28287588	241	28287500	9	8.00723	5.65536	3.78597	Intergenic	L1Md_F|LINE|L1		Prl5a1	NM_023746
APP	chr13	29329480	29329708	229	29329563	12	9.45707	6.03991	5.0882	Intergenic	Intergenic		Cdkal1	NM_144536
APP	chr13	33774076	33774449	374	33774158	8	5.6934	4.33625	2.07152	Intergenic	L1Md_T|LINE|L1		Serpinb6d	NM_001300892;NM_001076790
APP	chr13	33873360	33873575	216	33873543	8	6.88952	5.08983	2.88239	Intergenic	L1Md_T|LINE|L1		Serpinb6e;Serpinb6c	NM_001045535;NM_148942
APP	chr13	35660346	35660694	349	35660616	9	8.44414	5.91786	4.15533	Intergenic	L1Md_T|LINE|L1		Cdyl	NM_009881
APP	chr13	35661070	35661327	258	35661190	15	8.45702	4.84159	4.16663	Intergenic	L1Md_T|LINE|L1		Cdyl	NM_009881
APP	chr13	39800764	39801015	252	39800880	9	6.3968	4.64609	2.49375	Intergenic	CT-rich|Low_complexity|Low_complexity
APP	chr13	40684875	40685161	287	40685068	9	5.29738	3.94249	1.75791	Intergenic	L1Md_T|LINE|L1
APP	chr13	42223802	42224034	233	42223879	12	10.6244	6.76421	6.17349	Intron	L1Md_F2|LINE|L1		Hivep1	NM_007772
APP	chr13	42952147	42952346	200	42952211	9	7.62344	5.41989	3.46838	Intron	(CA)n|Simple_repeat|Simple_repeat		Phactr1	NM_198419;NM_001005740
APP	chr13	45289819	45290037	219	45289855	8	7.28	5.32607	3.17509	Intergenic	Intergenic
APP	chr13	50217067	50217311	245	50217228	10	9.63869	6.50345	5.25524	Intergenic	L1Md_T|LINE|L1
APP	chr13	50272362	50272610	249	50272428	7	5.81683	4.52429	2.11363	Intergenic	L1Md_F2|LINE|L1		Gm906;2310081J21Rik	NR_045474;NM_001033438
APP	chr13	57083388	57083660	273	57083533	11	9.89567	6.50387	5.48726	Intergenic	L1Md_T|LINE|L1		Trpc7	NM_012035
APP	chr13	65458572	65459016	445	65458823	9	8.44414	5.91786	4.15533	Intergenic	L1Md_F2|LINE|L1		Zfp369	NM_178364
APP	chr13	65527597	65527796	200	65527747	6	5.0922	4.1425	1.60528	Intergenic	L1Md_F2|LINE|L1
APP	chr13	65669418	65669617	200	65669518	8	7.28	5.32607	3.17509	Intergenic	L1Md_F2|LINE|L1
APP	chr13	65986396	65986595	200	65986541	10	6.15787	4.33674	2.31281	Intergenic	L1Md_F2|LINE|L1
APP	chr13	66022444	66022991	548	66022795	12	7.9867	5.12524	3.78597	Intergenic	L1Md_T|LINE|L1
APP	chr13	66756870	66757188	319	66757021	14	9.94237	5.91374	5.53008	Intergenic	L1Md_T|LINE|L1
APP	chr13	67155294	67155493	200	67155378	7	6.16097	4.73429	2.31281	Intron	intron (NM_001166218, intron 1 of 3)		Zfp712	NM_001166218
APP	chr13	67905407	67905610	204	67905579	8	7.28	5.32607	3.17509	Intron	(TCTCTG)n|Simple_repeat|Simple_repeat		4930525G20Rik	NR_045194
APP	chr13	68111193	68111392	200	68111246	6	5.08572	4.13856	1.60528	Intergenic	L1Md_F3|LINE|L1
APP	chr13	68461918	68462118	201	68461958	14	10.9078	6.50478	6.44166	Intergenic	L1Md_A|LINE|L1
APP	chr13	69036786	69037097	312	69036938	10	7.38071	5.1107	3.24811	Intron	L1Md_T|LINE|L1		Adcy2	NM_153534
APP	chr13	70022660	70022926	267	70022799	9	6.95815	5.00325	2.94082	Intergenic	L1Md_A|LINE|L1		Med10	NM_138596
APP	chr13	70532916	70533152	237	70532981	11	7.05525	4.73099	3.02535	Intergenic	L1Md_T|LINE|L1
APP	chr13	72174957	72175269	313	72175034	11	10.3617	6.78644	5.92478	Intergenic	L1Md_T|LINE|L1		Irx1	NM_010573
APP	chr13	73265814	73266105	292	73265984	11	10.3617	6.78644	5.92478	Intergenic	L1Md_A|LINE|L1
APP	chr13	73266751	73267034	284	73266812	7	4.55469	3.71687	1.33676	Intergenic	L1Md_A|LINE|L1
APP	chr13	74665916	74667284	1369	74666327	105	29.1106	3.699	24.3445	Intergenic	(CACAG)n|Simple_repeat|Simple_repeat		Zfp825	NM_146231
APP	chr13	74667346	74667693	348	74667529	118	18.0567	2.48631	13.413	Intergenic	(CACAG)n|Simple_repeat|Simple_repeat		Zfp825	NM_146231
APP	chr13	74667822	74668180	359	74668001	128	25.462	2.93042	20.7401	Intergenic	(CACAG)n|Simple_repeat|Simple_repeat		Zfp825	NM_146231
APP	chr13	74844165	74844391	227	74844250	10	8.74089	5.96188	4.42832	Intron	L1Md_T|LINE|L1		Cast	NM_001301158;NM_001301157;NM_001301181;NM_001301155;NM_009817;NM_001301156;NM_001301153;NM_001301160
APP	chr13	76642772	76643030	259	76642955	9	8.44414	5.91786	4.15533	Intron	L1Md_A|LINE|L1		Mctp1	NM_030174
APP	chr13	77569815	77570031	217	77569965	10	7.38071	5.1107	3.24811	Intron	L1Md_T|LINE|L1		2210408I21Rik	NM_001145676
APP	chr13	77707657	77707898	242	77707776	10	8.00362	5.50357	3.78597	Intron	L1Md_A|LINE|L1		2210408I21Rik	NM_001145676
APP	chr13	77802789	77803060	272	77802901	9	6.66638	4.81806	2.73012	Intergenic	MusHAL1|LINE|L1		Fam172a;2210408I21Rik	NM_138312;NR_028109;NM_001163420;NM_001145676;NM_001163419
APP	chr13	77936653	77936883	231	77936801	11	10.2647	6.72798	5.83776	Intron	L1Md_T|LINE|L1		Fam172a	NM_138312;NR_028109;NM_001163420;NM_001163419
APP	chr13	79562550	79562771	222	79562739	9	6.3968	4.64609	2.49375	Intergenic	L1Md_T|LINE|L1
APP	chr13	79859904	79860150	247	79860045	11	9.47285	6.24389	5.10036	Intergenic	L1Md_T|LINE|L1
APP	chr13	80165521	80165720	200	80165584	9	6.3968	4.64609	2.49375	Intergenic	L1Md_T|LINE|L1
APP	chr13	80190659	80190858	200	80190748	6	4.7943	3.95876	1.46767	Intergenic	L1Md_F|LINE|L1
APP	chr13	80738108	80738337	230	80738200	6	5.0922	4.1425	1.60528	Intergenic	L1Md_F2|LINE|L1
APP	chr13	80772295	80772516	222	80772427	9	7.62344	5.41989	3.46838	Intergenic	L1Md_Gf|LINE|L1
APP	chr13	81726429	81726639	211	81726578	13	7.74751	4.79357	3.58134	Intron	L1Md_T|LINE|L1		Gpr98	NM_054053
APP	chr13	82831724	82831966	243	82831776	9	6.14655	4.48597	2.31281	Intergenic	L1Md_T|LINE|L1
APP	chr13	83606104	83606370	267	83606296	10	9.1658	6.2209	4.81433	Intergenic	(TTTTTG)n|Simple_repeat|Simple_repeat		Mef2c	NM_001170537;NM_025282
APP	chr13	84952490	84952930	441	84952743	12	6.88037	4.45117	2.88239	Intergenic	L1Md_F2|LINE|L1
APP	chr13	84975734	84975995	262	84975840	11	8.40176	5.5753	4.14211	Intergenic	L1Md_A|LINE|L1
APP	chr13	84976164	84976444	281	84976195	8	4.47711	3.54824	1.32716	Intergenic	L1Md_A|LINE|L1
APP	chr13	85266601	85266809	209	85266781	61	11.4166	2.66337	6.93018	Intergenic	Intergenic		Ccnh;Rasa1	NM_023243;NM_145452
APP	chr13	85607044	85607247	204	85607117	12	7.9867	5.12524	3.78597	Intergenic	L1Md_A|LINE|L1
APP	chr13	86339099	86339336	238	86339267	10	7.67996	5.29986	3.51865	Intergenic	L1Md_F2|LINE|L1
APP	chr13	86649722	86649921	200	86649809	9	6.3968	4.64609	2.49375	Intergenic	L1Md_Gf|LINE|L1
APP	chr13	89589539	89589862	324	89589665	7	4.55469	3.71687	1.33676	Intergenic	L1_Mm|LINE|L1		Hapln1	NM_013500
APP	chr13	91469516	91469715	200	91469662	9	8.00723	5.65536	3.78597	Intergenic	L1Md_A|LINE|L1		A830009L08Rik	NR_045161
APP	chr13	94162685	94162904	220	94162847	12	7.9867	5.12524	3.78597	Intron	(TG)n|Simple_repeat|Simple_repeat		Homer1	NM_147176;NM_001284189;NM_152134
APP	chr13	94305091	94305290	200	94305208	7	6.16097	4.73429	2.31281	Intergenic	IAPEz-int|LTR|ERVK		Jmy;Bhmt	NM_021310;NM_016668
APP	chr13	100671663	100671862	200	100671830	12	6.88037	4.45117	2.88239	Promoter	Intergenic		Cartpt	NM_013732;NM_001081493
APP	chr13	100671932	100672365	434	100672131	11	8.73073	5.78167	4.42486	Promoter	Intergenic		Cartpt	NM_013732;NM_001081493
APP	chr13	100672492	100673350	859	100672637	11	10.8802	7.09468	6.41806	Promoter	Intergenic		Cartpt	NM_013732;NM_001081493
APP	chr13	103193233	103193493	261	103193305	9	8.44414	5.91786	4.15533	Intergenic	L1Md_T|LINE|L1
APP	chr13	105069874	105070179	306	105070040	15	14.8354	8.67182	10.2468	Intergenic	L1Md_A|LINE|L1		Adamts6;Ppwd1;Cenpk;Trim23	NM_172807;NR_075088;NM_181061;NM_001081020;NM_030731;NM_021790
APP	chr13	108149306	108149551	246	108149398	9	6.3968	4.64609	2.49375	Intergenic	L1Md_T|LINE|L1
APP	chr13	111796040	111796239	200	111796092	6	5.0922	4.1425	1.60528	Intergenic	L1_Mus1|LINE|L1
APP	chr13	112811243	112811660	418	112811495	13	12.8544	7.91751	8.31498	Intergenic	(CA)n|Simple_repeat|Simple_repeat
APP	chr13	113796160	113796372	213	113796194	9	6.3968	4.64609	2.49375	Intergenic	L1Md_F|LINE|L1		Gzma;Skiv2l2;Mir449a;Mir449b;Mir449c;Mcidas;Dhx29;Gpx8;Cdc20b;Ccno	NM_001081062;NR_029961;NM_027127;NM_010370;NR_030602;NM_172594;NM_001037914;NM_028151;NR_030452;NM_001281487
APP	chr13	116380473	116380731	259	116380559	10	6.15787	4.33674	2.31281	Intergenic	L1Md_T|LINE|L1
APP	chr13	116750618	116750817	200	116750769	9	7.62344	5.41989	3.46838	Intergenic	L1Md_F2|LINE|L1
APP	chr13	116982975	116983335	361	116983157	96	15.5488	2.53533	10.9452	Intergenic	(CCCTAA)n|Simple_repeat|Simple_repeat
APP	chr13	118181445	118181684	240	118181623	9	8.43465	5.91223	4.15533	Intergenic	L1Md_F|LINE|L1
APP	chr13	118585700	118585899	200	118585837	7	6.16097	4.73429	2.31281	Intron	CT-rich|Low_complexity|Low_complexity		Hcn1	NM_010408
APP	chr13	119740336	119740535	200	119740405	7	6.16097	4.73429	2.31281	Intergenic	L1Md_F3|LINE|L1
APP	chr14	3559869	3560165	297	3559976	8	7.28	5.32607	3.17509	Intergenic	intron (NM_001256501, intron 4 of 4)		Gm10409	NR_033121
APP	chr14	4390376	4390626	251	4390454	9	7.62344	5.41989	3.46838	Intergenic	L1_Mm|LINE|L1
APP	chr14	4796761	4797008	248	4796912	7	6.16097	4.73429	2.31281	Intergenic	L1Md_T|LINE|L1
APP	chr14	5621378	5621594	217	5621514	9	8.44414	5.91786	4.15533	Intergenic	(TG)n|Simple_repeat|Simple_repeat		Gm3383	NM_001291094
APP	chr14	5728440	5728668	229	5728538	9	8.44414	5.91786	4.15533	Intergenic	CT-rich|Low_complexity|Low_complexity		Gm3383	NM_001291094
APP	chr14	6815861	6816061	201	6815910	10	9.1658	6.2209	4.81433	Intergenic	intron (NM_001270812, intron 2 of 5).3		Gm3488	NM_001256885
APP	chr14	7519985	7520190	206	7520155	8	7.28	5.32607	3.17509	Intergenic	Intergenic
APP	chr14	8356394	8356593	200	8356501	10	9.1658	6.2209	4.81433	Intergenic	L1Md_T|LINE|L1		Gm3558	NM_001270842
APP	chr14	8541000	8541237	238	8541155	10	8.35562	5.72357	4.11055	Intergenic	L1Md_F2|LINE|L1
APP	chr14	8703110	8704273	1164	8703802	73	41.284	7.5244	36.3172	Intron	intron (NM_134080, intron 3 of 45)		Flnb	NM_134080;NM_001081427
APP	chr14	8753753	8753958	206	8753864	8	7.28	5.32607	3.17509	Intron	(GAAA)n|Simple_repeat|Simple_repeat		Flnb	NM_134080;NM_001081427
APP	chr14	9929824	9930037	214	9929931	9	7.62344	5.41989	3.46838	Intergenic	L1Md_F2|LINE|L1
APP	chr14	10945525	10945771	247	10945695	9	6.3968	4.64609	2.49375	Intron	L1Md_T|LINE|L1		Fhit	NM_010210
APP	chr14	13950883	13951092	210	13951019	8	6.54678	4.8779	2.62118	Intergenic	L1Md_T|LINE|L1		Gm5087	NR_121588
APP	chr14	16795179	16795380	202	16795187	11	6.0447	4.10877	2.31281	Intergenic	L1Md_F|LINE|L1
APP	chr14	18158110	18158360	251	18158191	7	4.76514	3.85445	1.46767	Intergenic	L1Md_Gf|LINE|L1
APP	chr14	19267403	19267602	200	19267512	8	5.45343	4.18148	1.87107	Intergenic	L1Md_A|LINE|L1
APP	chr14	19352392	19352612	221	19352513	8	6.88952	5.08983	2.88239	Intergenic	L1Md_A|LINE|L1		Ube2e2	NM_144839
APP	chr14	19928759	19929008	250	19928850	8	6.85361	5.06781	2.88239	Intergenic	L1Md_T|LINE|L1
APP	chr14	20138225	20138542	318	20138403	12	12.1686	7.69322	7.65191	Intergenic	L1Md_T|LINE|L1
APP	chr14	25138796	25139066	271	25138908	8	7.28	5.32607	3.17509	Intergenic	L1Md_T|LINE|L1		Dlg5;E330034G19Rik	NM_001163513;NM_027726;NM_001033214
APP	chr14	25427427	25427626	200	25427490	8	5.45343	4.18148	1.87107	Intergenic	(TTTC)n|Simple_repeat|Simple_repeat
APP	chr14	29432132	29432588	457	29432488	14	14.8161	8.87679	10.2281	Intergenic	L1Md_A|LINE|L1		Wnt5a	NM_009524;NM_001256224
APP	chr14	31775871	31776278	408	31776188	8	7.27152	5.32101	3.17509	Intron	intron (NM_011849, intron 5 of 14)		Nek4	NM_011849
APP	chr14	33323543	33324008	466	33323697	14	14.1464	8.48305	9.57359	Promoter	Intergenic		Ercc6	NM_001081221
APP	chr14	33665149	33665372	224	33665214	8	7.27152	5.32101	3.17509	Promoter	L1Md_A|LINE|L1		Vstm4	NM_178791
APP	chr14	36345279	36345481	203	36345350	9	6.95815	5.00325	2.94082	Intron	L1Md_A|LINE|L1		Grid1	NM_008166
APP	chr14	37118626	37118856	231	37118672	9	8.00723	5.65536	3.78597	Intergenic	L1Md_T|LINE|L1
APP	chr14	38574841	38575040	200	38575005	9	8.00723	5.65536	3.78597	Intergenic	(CAA)n|Simple_repeat|Simple_repeat
APP	chr14	38828436	38828650	215	38828610	8	6.88952	5.08983	2.88239	Intergenic	L1Md_F|LINE|L1
APP	chr14	39420088	39420305	218	39420195	10	7.38071	5.1107	3.24811	Intron	L1Md_T|LINE|L1		Nrg3	NM_001190188;NM_008734;NM_001190187
APP	chr14	39997307	39997596	290	39997461	10	8.74089	5.96188	4.42832	Intron	L1VL2|LINE|L1		Nrg3	NM_001190188;NM_008734;NM_001190187
APP	chr14	41595576	41595866	291	41595733	8	6.54678	4.8779	2.62118	Intergenic	L1Md_T|LINE|L1		Sh2d4b	NM_177816
APP	chr14	42205399	42205633	235	42205439	8	6.03568	4.55545	2.30973	Intergenic	Intergenic
APP	chr14	42572696	42572895	200	42572815	9	8.43465	5.91223	4.15533	Intergenic	L1Md_T|LINE|L1		1700091H14Rik	NR_073362
APP	chr14	42727508	42727720	213	42727556	9	6.66638	4.81806	2.73012	Intergenic	MusHAL1|LINE|L1		1700091H14Rik	NR_073362
APP	chr14	42860984	42861227	244	42861171	7	6.15349	4.72978	2.31281	Intergenic	L1Md_F|LINE|L1		LOC101056136	NR_105055
APP	chr14	42940812	42941011	200	42940823	9	6.3968	4.64609	2.49375	Intergenic	MusHAL1|LINE|L1
APP	chr14	43823412	43823638	227	43823544	8	7.23131	5.29695	3.17509	Intergenic	L1Md_T|LINE|L1
APP	chr14	50624367	50624720	354	50624589	8	7.28	5.32607	3.17509	Intergenic	L1Md_T|LINE|L1		Olfr723;Olfr725;Olfr724;Olfr726	NM_146316;NM_001011530;NM_146492;NM_146317
APP	chr14	50627293	50627504	212	50627379	8	7.27152	5.32101	3.17509	Intergenic	L1Md_T|LINE|L1		Olfr723;Olfr725;Olfr724;Olfr726	NM_146316;NM_001011530;NM_146492;NM_146317
APP	chr14	51245686	51245885	200	51245737	11	9.89567	6.50387	5.48726	Intergenic	L1Md_T|LINE|L1		Olfr748;Olfr743;Olfr747;Olfr746;Olfr745;Olfr744	NM_001177508;NM_001011837;NM_207156;NM_146299;NM_146298;NM_001011738
APP	chr14	51285277	51285582	306	51285441	8	6.88952	5.08983	2.88239	Intergenic	L1Md_A|LINE|L1		Ttc5;Olfr749;Olfr748;Olfr747;Olfr746;Olfr745;Olfr744	NM_020288;NM_001011837;NM_207156;NM_146299;NM_146298;NM_001080949;NM_001011738
APP	chr14	52013474	52013673	200	52013552	9	7.27567	5.20324	3.17509	Intergenic	L1Md_F3|LINE|L1		4930597G03Rik;Vmn2r88;Vmn2r89	NR_045736;NM_009487;NM_009486;NR_104384;NM_011686
APP	chr14	53142693	53142892	200	53142734	8	7.28	5.32607	3.17509	Intergenic	L1Md_F|LINE|L1		Olfr1507;Olfr1509;Olfr1508	NM_020513;NM_001170918;NM_020512;NM_020514
APP	chr14	53210562	53210867	306	53210722	9	8.00723	5.65536	3.78597	Intergenic	L1Md_A|LINE|L1		Olfr1507	NM_001170918;NM_020512
APP	chr14	53633937	53634136	200	53634106	9	6.14655	4.48597	2.31281	Intergenic	L1Md_T|LINE|L1
APP	chr14	56764579	56764964	386	56764881	10	7.67996	5.29986	3.51865	Intergenic	L1Md_F2|LINE|L1		Gzmd;Gzme;Gzmf;Gzmg;Gzmc;Mir6949;Gzmn;Ctsg;Mcpt4;Mcpt8	NM_007800;NM_010374;NM_010375;NM_008572;NM_010372;NM_010373;NR_105914;NM_010779;NM_153052;NM_010371
APP	chr14	58614503	58614794	292	58614625	7	6.16097	4.73429	2.31281	Intron	(CA)n|Simple_repeat|Simple_repeat		Micu2	NM_028643
APP	chr14	69732055	69732254	200	69732067	7	6.15349	4.72978	2.31281	Intergenic	L1Md_A|LINE|L1		Stc1;1700092C10Rik;Nkx2-6;Nkx3-1	NM_010921;NM_009285;NR_045931;NM_010920
APP	chr14	69779939	69780149	211	69780110	92	13.4062	2.38293	8.8522	Intergenic	(CCCTAA)n|Simple_repeat|Simple_repeat		1700092C10Rik;Nkx2-6;Slc25a37;Nkx3-1	NM_026331;NM_010921;NR_045931;NM_010920
APP	chr14	69780203	69780500	298	69780465	53	9.91236	2.62264	5.50314	Intergenic	(CCCTAA)n|Simple_repeat|Simple_repeat		1700092C10Rik;Nkx2-6;Slc25a37;Nkx3-1	NM_026331;NM_010921;NR_045931;NM_010920
APP	chr14	72925317	72925516	200	72925444	9	6.3968	4.64609	2.49375	Intergenic	L1Md_T|LINE|L1		Fndc3a	NM_207636
APP	chr14	74189500	74189699	200	74189530	7	6.16097	4.73429	2.31281	Intergenic	L1Md_A|LINE|L1
APP	chr14	80583468	80583667	200	80583625	10	9.1658	6.2209	4.81433	Intergenic	L1Md_T|LINE|L1
APP	chr14	81720379	81720578	200	81720433	8	6.88952	5.08983	2.88239	Intergenic	L1_Mus1|LINE|L1
APP	chr14	83566437	83566652	216	83566486	8	7.28	5.32607	3.17509	Intergenic	L1Md_F2|LINE|L1
APP	chr14	84829859	84830058	200	84829923	9	8.00723	5.65536	3.78597	Intergenic	Intergenic		9630013A20Rik;Pcdh17	NR_015539;NM_001013753
APP	chr14	85002085	85002284	200	85002236	8	5.45343	4.18148	1.87107	Intergenic	L1Md_A|LINE|L1		Pcdh17	NM_001013753
APP	chr14	85666385	85666637	253	85666516	11	10.3617	6.78644	5.92478	Intergenic	L1Md_A|LINE|L1
APP	chr14	85814987	85815186	200	85815030	11	8.40176	5.5753	4.14211	Intergenic	L1Md_A|LINE|L1
APP	chr14	86598678	86599068	391	86598889	156	12.213	1.85278	7.69485	Intergenic	(TTAGGG)n|Simple_repeat|Simple_repeat		4930529K09Rik	NR_040457
APP	chr14	87755971	87756313	343	87756098	9	8.44414	5.91786	4.15533	Intergenic	L1Md_A|LINE|L1		Tdrd3	NM_001253755;NM_172605
APP	chr14	88163099	88163332	234	88163209	8	7.28	5.32607	3.17509	Intergenic	L1_Mus1|LINE|L1
APP	chr14	88878967	88879312	346	88879126	21	11.5973	5.40152	7.10129	Intergenic	(TTAGGG)n|Simple_repeat|Simple_repeat		Pcdh20	NM_178685
APP	chr14	88909791	88909990	200	88909929	9	8.00723	5.65536	3.78597	Intergenic	(CA)n|Simple_repeat|Simple_repeat		Pcdh20	NM_178685
APP	chr14	92061049	92061248	200	92061147	9	8.43465	5.91223	4.15533	Intergenic	(TTTCC)n|Simple_repeat|Simple_repeat
APP	chr14	92152359	92152606	248	92152497	11	7.05525	4.73099	3.02535	Intergenic	L1Md_T|LINE|L1
APP	chr14	92333259	92333494	236	92333387	7	6.16097	4.73429	2.31281	Intergenic	L1Md_F2|LINE|L1
APP	chr14	93193192	93193418	227	93193318	10	7.38071	5.1107	3.24811	Intergenic	L1Md_A|LINE|L1
APP	chr14	94770377	94770588	212	94770539	9	8.00723	5.65536	3.78597	Intergenic	Lx|LINE|L1
APP	chr14	95763132	95763388	257	95763201	8	6.23645	4.68292	2.37084	Intergenic	L1Md_T|LINE|L1
APP	chr14	98114727	98114926	200	98114764	7	5.81683	4.52429	2.11363	Intergenic	L1Md_T|LINE|L1		Dach1	NM_001038610;NM_007826
APP	chr14	98639694	98639921	228	98639884	8	6.88952	5.08983	2.88239	Intergenic	L1Md_F2|LINE|L1		Dach1	NM_001038610;NM_007826
APP	chr14	103638921	103639171	251	103638995	9	6.3968	4.64609	2.49375	Intron	L1Md_F2|LINE|L1		Mycbp2	NM_207215
APP	chr14	105109507	105109707	201	105109593	10	8.35562	5.72357	4.11055	Intron	L1Md_T|LINE|L1		D130009I18Rik	NR_015593
APP	chr14	106332055	106332254	200	106332092	6	4.29768	3.64227	1.17724	Intergenic	L1Md_A|LINE|L1		Spry2	NM_011897
APP	chr14	110075299	110075648	350	110075476	44	10.984	3.11547	6.51443	Intergenic	(CCCTAA)n|Simple_repeat|Simple_repeat
APP	chr14	112917976	112918327	352	112918150	53	10.526	2.72429	6.08165	Intergenic	(CCCTAA)n|Simple_repeat|Simple_repeat
APP	chr14	115513715	115513962	248	115513866	9	8.43465	5.91223	4.15533	Intron	L1Md_A|LINE|L1		Gpc5	NM_175500
APP	chr14	116727989	116728188	200	116728100	7	5.81683	4.52429	2.11363	Intron	L1Md_T|LINE|L1		Gpc5	NM_175500
APP	chr14	121148292	121148491	200	121148326	8	6.88952	5.08983	2.88239	Intergenic	L1Md_A|LINE|L1
APP	chr14	123025935	123026134	200	123026037	10	6.15787	4.33674	2.31281	Intron	L1Md_T|LINE|L1		Pcca	NM_144844
APP	chr14	123174333	123174532	200	123174411	11	9.89567	6.50387	5.48726	Intron	L1Md_T|LINE|L1		Pcca	NM_144844
APP	chr14	123818442	123818673	232	123818559	9	8.00723	5.65536	3.78597	Intron	L1Md_A|LINE|L1		Nalcn	NM_177393
APP	chr14	124104306	124104511	206	124104401	9	8.44414	5.91786	4.15533	Intron	L1Md_F2|LINE|L1		Itgbl1	NM_145467
APP	chr14	124231007	124231219	213	124231192	8	6.88952	5.08983	2.88239	Intron	L1Md_T|LINE|L1		Itgbl1	NM_145467
APP	chr14	124474233	124474502	270	124474429	8	7.28	5.32607	3.17509	Intron	L1Md_A|LINE|L1		Fgf14	NM_010201;NM_207667
APP	chr14	125067427	125067632	206	125067611	18	9.08436	4.66495	4.75444	Intron	Lx8|LINE|L1		Fgf14	NM_207667
APP	chr15	3106163	3106366	204	3106207	11	9.08633	6.0039	4.75444	Intergenic	L1Md_T|LINE|L1
APP	chr15	9327062	9327269	208	9327149	8	7.28	5.32607	3.17509	Intergenic	L1Md_T|LINE|L1		Ugt3a2;Capsl;Ugt3a1	NM_029341;NM_144845;NM_207216
APP	chr15	9470752	9470955	204	9470839	8	6.23645	4.68292	2.37084	Intergenic	L1Md_A|LINE|L1		Capsl;Il7r	NM_029341;NM_008372
APP	chr15	10332635	10332838	204	10332710	7	6.15349	4.72978	2.31281	Intron	L1Md_F3|LINE|L1		Agxt2	NM_001031851
APP	chr15	10978324	10978552	229	10978443	7	6.15349	4.72978	2.31281	Intergenic	L1Md_F2|LINE|L1		C1qtnf3;Rxfp3;Slc45a2;Adamts12;Amacr	NM_001204134;NM_175501;NM_178717;NM_053077;NM_030888;NM_008537
APP	chr15	10979057	10979256	200	10979152	8	7.27152	5.32101	3.17509	Intergenic	L1Md_F2|LINE|L1		C1qtnf3;Rxfp3;Slc45a2;Adamts12;Amacr	NM_001204134;NM_175501;NM_178717;NM_053077;NM_030888;NM_008537
APP	chr15	11358676	11358931	256	11358807	21	8.35639	3.92199	4.11114	Intergenic	(TG)n|Simple_repeat|Simple_repeat		Tars;Adamts12	NM_033074;NM_175501
APP	chr15	13604793	13604995	203	13604955	10	8.74089	5.96188	4.42832	Intergenic	L1Md_F2|LINE|L1
APP	chr15	14100337	14100554	218	14100387	14	9.94237	5.91374	5.53008	Intergenic	L1Md_Gf|LINE|L1
APP	chr15	16049706	16049915	210	16049810	11	9.47285	6.24389	5.10036	Intergenic	L1Md_T|LINE|L1
APP	chr15	17198764	17198963	200	17198856	8	5.45343	4.18148	1.87107	Intergenic	L1Md_T|LINE|L1
APP	chr15	18801317	18801516	200	18801428	8	6.88952	5.08983	2.88239	Intron	L1Md_F2|LINE|L1		Cdh10	NM_009865
APP	chr15	22618520	22618772	253	22618614	10	8.00362	5.50357	3.78597	Intergenic	L1Md_T|LINE|L1		Gm5803	NM_001165971
APP	chr15	24691828	24692064	237	24691890	9	4.47771	3.42398	1.32716	Intergenic	L1Md_A|LINE|L1
APP	chr15	28214746	28215011	266	28214921	8	6.23645	4.68292	2.37084	Intron	L1Md_T|LINE|L1		Dnah5	NM_133365
APP	chr15	29398399	29398644	246	29398553	10	7.38071	5.1107	3.24811	Intergenic	L1Md_T|LINE|L1
APP	chr15	30510445	30510644	200	30510627	10	6.15787	4.33674	2.31281	Intron	L1Md_T|LINE|L1		Ctnnd2	NM_008729
APP	chr15	31629858	31630129	272	31630040	8	6.88952	5.08983	2.88239	Intergenic	L1Md_F2|LINE|L1		Fam173b;Cct5	NM_007637;NM_026546
APP	chr15	33100824	33101072	249	33100936	8	7.28	5.32607	3.17509	Intron	L1Md_T|LINE|L1		Cpq	NM_018755;NM_176073
APP	chr15	33491611	33491871	261	33491735	8	6.88952	5.08983	2.88239	Intron	L1Md_F2|LINE|L1		Cpq	NM_018755;NM_176073
APP	chr15	34631611	34631846	236	34631654	8	7.28	5.32607	3.17509	Intergenic	L1Md_F2|LINE|L1		Nipal2;4930413F20Rik	NM_145469;NR_045883
APP	chr15	35948857	35949090	234	35948954	9	8.44414	5.91786	4.15533	Intron	L1_Mus3|LINE|L1		Rgs22	NM_001195748
APP	chr15	37472025	37472355	331	37472215	13	8.68405	5.35723	4.38153	Intron	(CA)n|Simple_repeat|Simple_repeat		Ncald	NM_134094;NM_001170866
APP	chr15	39170431	39170749	319	39170588	8	7.28	5.32607	3.17509	Intron	IAPEz-int|LTR|ERVK		Rims2	NM_053271;NM_001256383;NM_001256382
APP	chr15	40979937	40980136	200	40980008	9	8.44414	5.91786	4.15533	Intergenic	L1Md_F2|LINE|L1		Zfpm2	NM_011766
APP	chr15	41762536	41762874	339	41762679	12	9.45707	6.03991	5.0882	Intergenic	L1Md_T|LINE|L1		Oxr1;Abra	NM_130885;NM_001130163;NM_001130164;NM_001130165;NM_001130166;NM_175456
APP	chr15	43353657	43353916	260	43353773	10	9.64919	6.50965	5.25569	Intron	L1Md_A|LINE|L1		Emc2	NM_025736
APP	chr15	44485563	44485898	336	44485792	9	8.00723	5.65536	3.78597	Intergenic	L1Md_T|LINE|L1		Ebag9;Pkhd1l1;Sybu	NM_001285843;NM_138674;NM_001285844;NM_178765;NM_001285842;NM_019480;NM_001285840;NM_001285841;NM_001032727;NM_176998
APP	chr15	44819239	44819438	200	44819404	8	6.88952	5.08983	2.88239	Intergenic	L1Md_F2|LINE|L1
APP	chr15	45531738	45531937	200	45531777	9	6.66638	4.81806	2.73012	Intergenic	L1Md_T|LINE|L1
APP	chr15	45606715	45606944	230	45606816	11	8.40176	5.5753	4.14211	Intergenic	L1Md_A|LINE|L1
APP	chr15	45790609	45790853	245	45790765	8	6.88952	5.08983	2.88239	Intergenic	L1Md_F|LINE|L1
APP	chr15	45959601	45959800	200	45959668	8	7.28	5.32607	3.17509	Intergenic	(TG)n|Simple_repeat|Simple_repeat
APP	chr15	46702131	46702360	230	46702246	13	8.68405	5.35723	4.38153	Intergenic	L1Md_A|LINE|L1
APP	chr15	47081982	47082287	306	47082109	8	7.28	5.32607	3.17509	Intergenic	L1Md_T|LINE|L1
APP	chr15	47085087	47085286	200	47085237	8	6.88952	5.08983	2.88239	Intergenic	L1Md_T|LINE|L1
APP	chr15	47381878	47382077	200	47382036	7	6.16097	4.73429	2.31281	Intergenic	L1Md_T|LINE|L1		Csmd3	NM_001081391
APP	chr15	48231048	48231302	255	48231127	9	6.3968	4.64609	2.49375	Intron	L1Md_Gf|LINE|L1		Csmd3	NM_001081391
APP	chr15	49193608	49193882	275	49193792	11	8.40176	5.5753	4.14211	Intergenic	L1Md_A|LINE|L1
APP	chr15	49962450	49962829	380	49962644	11	8.40176	5.5753	4.14211	Intergenic	L1Md_T|LINE|L1
APP	chr15	50945857	50946070	214	50945922	7	4.55469	3.71687	1.33676	Intergenic	L1Md_A|LINE|L1
APP	chr15	52495877	52496142	266	52496011	12	11.5921	7.35197	7.09652	Intergenic	L1Md_T|LINE|L1		Med30	NM_027212
APP	chr15	52566941	52567152	212	52566956	8	5.45343	4.18148	1.87107	Intergenic	L1Md_T|LINE|L1		Med30	NM_027212
APP	chr15	52650675	52650878	204	52650776	11	7.81062	5.20383	3.64028	Intergenic	L1Md_F2|LINE|L1		Med30	NM_027212
APP	chr15	52674479	52674748	270	52674596	7	5.51507	4.33591	1.90641	Intergenic	L1Md_T|LINE|L1
APP	chr15	53407123	53407448	326	53407322	10	8.35562	5.72357	4.11055	Intron	L1Md_T|LINE|L1		Samd12	NM_177225
APP	chr15	55445298	55445533	236	55445354	31	9.78911	3.5295	5.38976	Intron	(TTTCC)n|Simple_repeat|Simple_repeat		Mtbp	NM_134092
APP	chr15	55956231	55956478	248	55956350	9	8.00723	5.65536	3.78597	Intergenic	L1Md_A|LINE|L1
APP	chr15	56738288	56738496	209	56738429	8	6.54678	4.8779	2.62118	Intergenic	L1Md_T|LINE|L1
APP	chr15	58270441	58270747	307	58270588	18	15.4202	8.23939	10.8193	Intron	intron (NM_145959, intron 15 of 23)		D15Ertd621e	NM_145959
APP	chr15	58271400	58271599	200	58271575	9	6.3968	4.64609	2.49375	Intron	intron (NM_145959, intron 15 of 23)		D15Ertd621e	NM_145959
APP	chr15	60068606	60068925	320	60068742	12	10.6244	6.76421	6.17349	Intergenic	L1Md_T|LINE|L1
APP	chr15	60270588	60270787	200	60270683	7	6.11804	4.7084	2.31281	Intergenic	L1Md_T|LINE|L1
APP	chr15	60806932	60807191	260	60807042	12	12.1686	7.69322	7.65191	Intergenic	L1Md_T|LINE|L1		A1bg	NM_001081067
APP	chr15	64282582	64282797	216	64282773	12	9.45707	6.03991	5.0882	Intergenic	L1Md_A|LINE|L1		Asap1	NM_001276461;NM_001276467;NM_010026
APP	chr15	64359324	64359530	207	64359486	9	7.62344	5.41989	3.46838	Intergenic	L1Md_T|LINE|L1
APP	chr15	64640649	64640848	200	64640751	8	7.28	5.32607	3.17509	Intron	(CA)n|Simple_repeat|Simple_repeat		Adcy8	NM_001291903;NM_009623
APP	chr15	65106389	65106626	238	65106539	9	7.62344	5.41989	3.46838	Intergenic	L1Md_T|LINE|L1
APP	chr15	65433782	65434009	228	65433864	7	6.16097	4.73429	2.31281	Intergenic	L1Md_A|LINE|L1
APP	chr15	65571240	65571540	301	65571381	13	8.94978	5.51949	4.62623	Intergenic	L1Md_T|LINE|L1		Efr3a	NM_133766
APP	chr15	65891337	65891536	200	65891403	10	7.38071	5.1107	3.24811	Intron	L1Md_T|LINE|L1		Kcnq3	NM_152923
APP	chr15	67744728	67744939	212	67744785	11	8.40176	5.5753	4.14211	Intergenic	L1Md_T|LINE|L1
APP	chr15	68201203	68201408	206	68201359	9	6.3968	4.64609	2.49375	Intergenic	L1Md_T|LINE|L1		Mir30d;Mir30b	NR_029718;NR_029534
APP	chr15	68462407	68462624	218	68462587	10	6.15787	4.33674	2.31281	Intergenic	L1Md_A|LINE|L1
APP	chr15	74916230	74916458	229	74916383	119	12.4882	2.06068	7.96161	Intergenic	(TTTC)n|Simple_repeat|Simple_repeat		Ly6c1;Ly6a;Ly6c2	NM_010741;NM_001271416;NM_001271417;NM_001271418;NM_001271419;NM_001252055;NM_001252056;NM_001252057;NM_001271446;NM_001252058;NM_001099217;NM_010738
APP	chr15	74916551	74916765	215	74916764	128	4.13597	1.41343	1.04005	Intergenic	CT-rich|Low_complexity|Low_complexity		Ly6c1;Ly6a;Ly6c2	NM_010741;NM_001271416;NM_001271417;NM_001271418;NM_001271419;NM_001252055;NM_001252056;NM_001252057;NM_001271446;NM_001252058;NM_001099217;NM_010738
APP	chr15	75132533	75133011	479	75132732	8	6.88952	5.08983	2.88239	Intergenic	L1Md_T|LINE|L1		Ly6f	NM_008530
APP	chr15	86146987	86147186	200	86147044	6	5.0922	4.1425	1.60528	Intron	IAPEz-int|LTR|ERVK		Tbc1d22a	NM_145476
APP	chr15	87121055	87121254	200	87121166	7	6.16097	4.73429	2.31281	Intergenic	(TAGA)n|Simple_repeat|Simple_repeat
APP	chr15	91409908	91410135	228	91410034	7	6.16097	4.73429	2.31281	Intergenic	L1_Mm|LINE|L1		Slc2a13;Lrrk2	NM_025730;NM_001033633
APP	chr15	91818774	91819030	257	91818839	7	6.16097	4.73429	2.31281	Intergenic	L1Md_A|LINE|L1		Cntn1;Muc19	NM_001159648;NM_207243
APP	chr15	92890224	92890558	335	92890399	11	6.0447	4.10877	2.31281	Intergenic	L1Md_T|LINE|L1
APP	chr15	93701868	93702067	200	93701996	8	6.54678	4.8779	2.62118	Intergenic	L1Md_T|LINE|L1		9430014N10Rik	NR_045737
APP	chr15	93702134	93702333	200	93702215	11	8.40176	5.5753	4.14211	Intergenic	L1Md_T|LINE|L1		9430014N10Rik	NR_045737
APP	chr15	93919200	93919583	384	93919390	19	13.5101	6.84795	8.95266	Intergenic	(TG)n|Simple_repeat|Simple_repeat
APP	chr15	93919695	93919928	234	93919706	12	4.68515	3.19181	1.46188	Intergenic	(TG)n|Simple_repeat|Simple_repeat
APP	chr15	94130223	94130422	200	94130343	8	7.27152	5.32101	3.17509	Intron	L1Md_A|LINE|L1		Adamts20	NM_177431
APP	chr15	94320668	94320964	297	94320783	10	7.38071	5.1107	3.24811	Intergenic	(TG)n|Simple_repeat|Simple_repeat		Adamts20;Pus7l;Twf1;Irak4	NM_029926;NM_172437;NM_008971;NM_177431;NM_001164785;NM_001164786
APP	chr15	98272206	98272474	269	98272293	13	6.00973	3.79526	2.28483	Intergenic	(TG)n|Simple_repeat|Simple_repeat		Mir1291;Kansl2;Lalba;Snora34;Olfr282;Olfr283;Snora2b;Olfr281;Olfr279;1700031M16Rik	NM_147036;NR_034052;NR_034051;NM_010679;NM_146457;NM_133714;NM_001289440;NM_001001807;NM_001289439;NM_001289438;NM_001289437;NR_015496;NM_146280;NR_106171
APP	chr15	103487588	103487931	344	103487871	11	8.40176	5.5753	4.14211	Intergenic	L1Md_T|LINE|L1		Glycam1	NM_008134;NM_001289587
APP	chr15	103488689	103488888	200	103488854	6	5.0922	4.1425	1.60528	Intergenic	L1Md_T|LINE|L1		Glycam1	NM_008134;NM_001289587
APP	chr16	3116304	3116508	205	3116316	62	5.33514	1.81023	1.79488	Intergenic	(GAAA)n|Simple_repeat|Simple_repeat
APP	chr16	5481030	5481229	200	5481185	6	4.7943	3.95876	1.46767	Intergenic	Intergenic
APP	chr16	5558879	5559150	272	5558979	10	7.38071	5.1107	3.24811	Intergenic	L1Md_T|LINE|L1
APP	chr16	8221615	8221819	205	8221723	8	5.45343	4.18148	1.87107	Intergenic	L1M3|LINE|L1
APP	chr16	10401968	10402242	275	10402113	8	7.28	5.32607	3.17509	Intergenic	L1Md_T|LINE|L1		Tekt5;Nubp1;Emp2;Tvp23a;Ciita	NM_001291001;NM_001013778;NM_011955;NM_001243761;NM_001099275;NM_007575;NM_007929;NM_001243760
APP	chr16	12463996	12464226	231	12464170	11	7.05525	4.73099	3.02535	Intergenic	L1Md_T|LINE|L1
APP	chr16	14597912	14598121	210	14598096	7	6.16097	4.73429	2.31281	Intron	L1VL1|LINE|L1		A630010A05Rik	NR_033556
APP	chr16	14631173	14631541	369	14631349	11	8.40176	5.5753	4.14211	Intergenic	(CACAG)n|Simple_repeat|Simple_repeat		A630010A05Rik;Snai2	NR_033556;NM_011415
APP	chr16	14814594	14814794	201	14814661	8	6.54678	4.8779	2.62118	Intergenic	L1Md_T|LINE|L1		Efcab1	NM_025769
APP	chr16	16397149	16397487	339	16397304	17	11.4926	6.16316	7.00315	Intergenic	L1Md_T|LINE|L1		Dnm1l;Yars2;Fgd4	NM_152816;NR_075074;NM_001276341;NM_001276340;NM_198246;NR_038046;NM_001025947;NM_139234;NM_139233;NM_139232
APP	chr16	19144646	19145107	462	19144766	9	6.14655	4.48597	2.31281	Intergenic	L1Md_T|LINE|L1
APP	chr16	19547821	19548329	509	19548087	11	10.8917	7.10143	6.42636	Intergenic	L1Md_T|LINE|L1		Olfr169;Olfr168;Olfr170;Olfr171;Olfr167;Olfr166	NM_146957;NM_146958;NM_146357;NM_146935;NM_001011855;NM_147068
APP	chr16	20953130	20953353	224	20953187	12	9.45707	6.03991	5.0882	Intergenic	L1Md_F|LINE|L1
APP	chr16	23751612	23751811	200	23751698	7	6.16097	4.73429	2.31281	Intergenic	L1_Mus3|LINE|L1
APP	chr16	23753053	23753281	229	23753108	7	6.15349	4.72978	2.31281	Intergenic	L1_Mus3|LINE|L1
APP	chr16	23976049	23976270	222	23976179	13	7.74751	4.79357	3.58134	Intron	(TG)n|Simple_repeat|Simple_repeat		Bcl6	NM_009744
APP	chr16	26496681	26497098	418	26496921	14	11.6609	6.96913	7.16209	Intergenic	Intergenic		Il1rap;Cldn16;Tmem207	NM_001101640;NM_053241;NM_008364;NM_001159318;NM_134103;NM_001159317
APP	chr16	26497163	26497510	348	26497341	17	11.4926	6.16316	7.00315	Intergenic	Intergenic		Il1rap;Cldn16;Tmem207	NM_001101640;NM_053241;NM_008364;NM_001159318;NM_134103;NM_001159317
APP	chr16	26498384	26499250	867	26498766	18	19.343	10.6069	14.6824	Intergenic	Intergenic		Il1rap;Cldn16;Tmem207	NM_001101640;NM_053241;NM_008364;NM_001159318;NM_134103;NM_001159317
APP	chr16	26499321	26499548	228	26499412	9	4.47771	3.42398	1.32716	Intergenic	Intergenic		Il1rap;Cldn16;Tmem207	NM_001101640;NM_053241;NM_008364;NM_001159318;NM_134103;NM_001159317
APP	chr16	27664582	27664781	200	27664623	7	5.81683	4.52429	2.11363	Intergenic	(GAAA)n|Simple_repeat|Simple_repeat
APP	chr16	36228343	36228605	263	36228349	7	4.55469	3.71687	1.33676	Intron	L1Md_T|LINE|L1		2010005H15Rik	NM_029733
APP	chr16	42558049	42558248	200	42558197	6	5.0922	4.1425	1.60528	Intergenic	L1Md_F2|LINE|L1
APP	chr16	42850166	42850365	200	42850281	11	9.08633	6.0039	4.75444	Intron	L1Md_A|LINE|L1		4932412D23Rik	NR_040521;NR_040522
APP	chr16	45466985	45467184	200	45467159	8	6.88952	5.08983	2.88239	Intron	L1Md_A|LINE|L1		Gm609	NM_001005854
APP	chr16	46017227	46017426	200	46017340	6	5.0922	4.1425	1.60528	Intergenic	L1_Mm|LINE|L1		Cd96;Plcxd2	NM_001134480;NM_032465
APP	chr16	47297918	47298210	293	47298063	8	6.88952	5.08983	2.88239	Intergenic	L1Md_T|LINE|L1
APP	chr16	47560460	47560659	200	47560557	6	5.0922	4.1425	1.60528	Intergenic	L1Md_A|LINE|L1
APP	chr16	47750970	47751169	200	47751126	8	7.28	5.32607	3.17509	Intergenic	L1Md_T|LINE|L1
APP	chr16	48541264	48541463	200	48541392	6	5.0922	4.1425	1.60528	Intron	RLTR10-int|LTR|ERVK		Morc1	NM_010816
APP	chr16	48857831	48858056	226	48857986	11	8.40176	5.5753	4.14211	Intergenic	L1Md_T|LINE|L1		Retnlb;Retnla;Trat1;Retnlg;Dzip3	NM_027341;NM_020509;NM_001110017;NM_023881;NM_181596;NM_198297
APP	chr16	49554754	49554986	233	49554940	7	4.55469	3.71687	1.33676	Intergenic	L1Md_A|LINE|L1
APP	chr16	52181927	52182140	214	52181989	9	8.44414	5.91786	4.15533	Intron	(CA)n|Simple_repeat|Simple_repeat		Cblb	NM_001033238
APP	chr16	53827787	53827986	200	53827863	9	8.00723	5.65536	3.78597	Intergenic	L1Md_T|LINE|L1
APP	chr16	53882959	53883158	200	53883089	9	6.14655	4.48597	2.31281	Intergenic	L1Md_T|LINE|L1
APP	chr16	56330049	56330375	327	56330099	9	6.66638	4.81806	2.73012	Intergenic	L1Md_F2|LINE|L1		Impg2	NM_174876
APP	chr16	56432941	56433140	200	56432976	8	5.95334	4.50292	2.23333	Intergenic	L1Md_A|LINE|L1		Abi3bp	NM_001014399;NM_001014424;NM_178790;NM_001014422;NM_001014423
APP	chr16	56457064	56457702	639	56457229	18	11.1435	5.74939	6.66708	Intergenic	(TATG)n|Simple_repeat|Simple_repeat		Abi3bp	NM_001014399;NM_001014424;NM_178790;NM_001014422;NM_001014423
APP	chr16	57590558	57590810	253	57590721	11	7.05525	4.73099	3.02535	Intron	L1Md_T|LINE|L1		Cmss1	NM_025599
APP	chr16	60948081	60948357	277	60948236	13	6.79314	4.23639	2.84948	Intergenic	(CACAG)n|Simple_repeat|Simple_repeat
APP	chr16	61002764	61002963	200	61002867	9	6.3968	4.64609	2.49375	Intergenic	Intergenic
APP	chr16	61099887	61100117	231	61100051	9	8.44414	5.91786	4.15533	Intergenic	L1Md_A|LINE|L1
APP	chr16	62315686	62315901	216	62315847	7	6.16097	4.73429	2.31281	Intergenic	L1Md_T|LINE|L1
APP	chr16	62364877	62365098	222	62364947	9	8.44414	5.91786	4.15533	Intergenic	L1_Mm|LINE|L1
APP	chr16	63969921	63970385	465	63970169	9	8.00723	5.65536	3.78597	Intergenic	L1Md_T|LINE|L1
APP	chr16	64573849	64574166	318	64574035	10	8.35562	5.72357	4.11055	Intergenic	L1Md_A|LINE|L1		Csnka2ip	NM_173861
APP	chr16	65231937	65232136	200	65232105	8	7.28	5.32607	3.17509	Intergenic	L1Md_F2|LINE|L1
APP	chr16	66230391	66230602	212	66230468	10	7.38071	5.1107	3.24811	Intergenic	L1Md_T|LINE|L1
APP	chr16	67389787	67390140	354	67389970	10	9.64919	6.50965	5.25569	Intron	L1Md_T|LINE|L1		Cadm2	NM_001145977;NM_178721
APP	chr16	69257545	69257747	203	69257623	10	5.24289	3.76637	1.72298	Intergenic	(CA)n|Simple_repeat|Simple_repeat
APP	chr16	69895271	69895470	200	69895371	11	9.47285	6.24389	5.10036	Intergenic	L1Md_T|LINE|L1		Speer2	NM_173069
APP	chr16	70819957	70820156	200	70820076	8	6.23645	4.68292	2.37084	Intergenic	L1Md_A|LINE|L1
APP	chr16	72597536	72597739	204	72597632	11	8.73073	5.78167	4.42486	Intergenic	L1Md_Gf|LINE|L1		Robo1	NM_019413
APP	chr16	73997303	73997662	360	73997376	7	6.15349	4.72978	2.31281	Intron	L1Md_T|LINE|L1		Robo2	NM_175549
APP	chr16	74207037	74207372	336	74207112	7	4.55469	3.71687	1.33676	Intron	L1Md_T|LINE|L1		Robo2	NM_175549
APP	chr16	74362096	74362349	254	74362218	11	10.3617	6.78644	5.92478	Intron	L1Md_A|LINE|L1		Robo2	NM_175549
APP	chr16	74975389	74975630	242	74975541	9	7.62344	5.41989	3.46838	Intergenic	L1Md_T|LINE|L1
APP	chr16	76640836	76641201	366	76641010	8	7.1523	5.24948	3.11455	Intergenic	L1Md_A|LINE|L1
APP	chr16	78660895	78661094	200	78661013	10	6.60066	4.61638	2.67229	Intergenic	(CA)n|Simple_repeat|Simple_repeat		4930478L05Rik;D16Ertd472e	NM_025967;NM_001252440;NM_001252438;NR_040569;NM_001252439
APP	chr16	81000196	81000492	297	81000257	11	7.05525	4.73099	3.02535	Intergenic	L1Md_A|LINE|L1
APP	chr16	86953622	86953821	200	86953650	8	5.45343	4.18148	1.87107	Intergenic	L1Md_T|LINE|L1
APP	chr16	87151568	87151791	224	87151673	9	7.62344	5.41989	3.46838	Intergenic	L1Md_T|LINE|L1
APP	chr16	88530595	88530794	200	88530622	7	5.24211	4.16259	1.72298	Intergenic	L1Md_T|LINE|L1		Cldn8;Cldn17;2310079G19Rik;Krtap24-1	NM_181490;NM_018778;NM_027173;NM_001163141
APP	chr16	89332004	89332203	200	89332033	8	6.54678	4.8779	2.62118	Intergenic	L1Md_T|LINE|L1		Krtap6-2;Krtap21-1	NM_028621;NM_010673
APP	chr16	89951897	89952242	346	89952074	9	8.44414	5.91786	4.15533	Intron	intron (NM_009384, intron 2 of 27)		Tiam1	NM_009384;NM_001145886
APP	chr16	90695829	90696028	200	90695976	9	8.44414	5.91786	4.15533	Intergenic	(TCTCTG)n|Simple_repeat|Simple_repeat		Urb1;Mis18a;Mrap	NM_029844;NM_029497;NM_025642
APP	chr16	92337848	92338191	344	92338030	11	9.47285	6.24389	5.10036	Intergenic	(TG)n|Simple_repeat|Simple_repeat		Kcne2;Smim11;Kcne1;4930563D23Rik;LOC101056236;Rcan1;1700048M11Rik	NM_001081549;NR_105054;NM_008424;NR_045300;NM_138743;NM_019466;NM_029252;NM_134110
APP	chr16	93789310	93789669	360	93789485	98	13.821	2.35152	9.25575	Intron	(CCCTAA)n|Simple_repeat|Simple_repeat		Dopey2	NM_027293
APP	chr16	95309127	95309326	200	95309210	8	7.1523	5.24948	3.11455	Intergenic	L1Md_T|LINE|L1		Kcnj6	NM_010606;NM_001025584;NM_001025585
APP	chr17	4813230	4813439	210	4813297	8	7.28	5.32607	3.17509	Intergenic	(GA)n|Simple_repeat|Simple_repeat
APP	chr17	9556272	9556471	200	9556383	11	9.08633	6.0039	4.75444	Intergenic	L1Md_A|LINE|L1
APP	chr17	12747754	12748113	360	12747859	8	7.28	5.32607	3.17509	Intergenic	L1Md_F2|LINE|L1		C030013G03Rik;Slc22a1;Slc22a2;Slc22a3	NM_013667;NR_077217;NR_077216;NM_011395;NM_009202
APP	chr17	13498757	13499196	440	13498937	108	10.945	2.01822	6.47759	Intergenic	(CTGTG)n|Simple_repeat|Simple_repeat		Smok2b;Gm10512;Smok2a;Tcp10c	NM_001167913;NR_033458;NM_001167578;NM_013741
APP	chr17	13743473	13746062	2590	13745798	191	28.964	2.52956	24.1999	Intron	(CTGTG)n|Simple_repeat|Simple_repeat		2700054A10Rik	NR_045436;NR_045437
APP	chr17	14721890	14722225	336	14722040	12	9.81579	6.26347	5.4145	Intergenic	L1Md_T|LINE|L1		Thbs2	NM_011581
APP	chr17	14942070	14942274	205	14942104	10	9.1658	6.2209	4.81433	Intergenic	L1Md_T|LINE|L1		Wdr27	NM_175173
APP	chr17	16275643	16275914	272	16275828	15	8.45702	4.84159	4.16663	Intergenic	L1Md_T|LINE|L1
APP	chr17	16296687	16296886	200	16296767	8	6.54678	4.8779	2.62118	Intergenic	L1Md_F|LINE|L1
APP	chr17	16528580	16528790	211	16528702	9	7.62344	5.41989	3.46838	Intergenic	L1Md_T|LINE|L1
APP	chr17	18742904	18743413	510	18743196	12	12.1686	7.69322	7.65191	Intergenic	L1Md_T|LINE|L1		Vmn2r96	NM_001104547
APP	chr17	19242972	19243178	207	19243039	11	7.05525	4.73099	3.02535	Intergenic	L1Md_T|LINE|L1		Vmn2r98	NM_001104550
APP	chr17	20162714	20162913	200	20162873	6	5.0922	4.1425	1.60528	Intergenic	L1Md_T|LINE|L1		Vmn2r104	NM_001104566
APP	chr17	20908804	20909092	289	20908933	8	6.88952	5.08983	2.88239	Intergenic	L1_Mur2|LINE|L1		Vmn1r228;Vmn1r229;Vmn1r226;Vmn1r227;Vmn1r230	NM_134191;NM_134190;NM_134192;NM_134195;NM_134197
APP	chr17	21264533	21264732	200	21264653	8	7.28	5.32607	3.17509	Intergenic	(TG)n|Simple_repeat|Simple_repeat		Zfp160	NM_145483
APP	chr17	22378535	22378774	240	22378670	9	7.62344	5.41989	3.46838	Intergenic	L1_Mus1|LINE|L1		Gm4944;Zfp947;Zfp944	NM_001205095;NM_176962;NM_177596
APP	chr17	23586720	23586923	204	23586878	10	8.74089	5.96188	4.42832	Intergenic	L1Md_T|LINE|L1		Vmn2r117;Vmn2r116;Vmn2r115	NM_001104581;NM_001104580;NM_001104579
APP	chr17	24479813	24480035	223	24479871	10	6.15787	4.33674	2.31281	Intron	Lx7|LINE|L1		Abca17	NM_001031621
APP	chr17	30220193	30220586	394	30220305	14	11.2716	6.72896	6.79076	Intron	L1M3e|LINE|L1		Zfand3	NM_148926
APP	chr17	39035328	39035690	363	39035488	8	7.28	5.32607	3.17509	Intergenic	L1Md_T|LINE|L1
APP	chr17	40025006	40025221	216	40025126	8	6.88952	5.08983	2.88239	Intergenic	L1Md_Gf|LINE|L1		Esp38;Rn45s	NR_046233;NM_001256051
APP	chr17	40262628	40262903	276	40262800	9	8.00723	5.65536	3.78597	Intergenic	L1Md_A|LINE|L1		Pgk2;Crisp3	NM_031190;NM_009639
APP	chr17	40822241	40822444	204	40822286	7	5.51507	4.33591	1.90641	Intergenic	L1Md_F2|LINE|L1		Esp1;Esp3;Esp4;Crisp2	NM_001177583;NM_001204071;NM_009420;NM_001038500;NM_001251916
APP	chr17	40892437	40892636	200	40892599	7	6.16097	4.73429	2.31281	Intergenic	L1Md_T|LINE|L1		Esp1;Rhag;Crisp2	NM_011269;NM_001204071;NM_009420;NM_001038500
APP	chr17	41925267	41925526	260	41925425	8	6.54678	4.8779	2.62118	Intergenic	L1Md_A|LINE|L1
APP	chr17	43600060	43600289	230	43600125	9	8.00723	5.65536	3.78597	Intergenic	MMERVK10C-int|LTR|ERVK		Gpr116;Mep1a;Ankrd66	NM_001254953;NM_008585;NM_001081178
APP	chr17	47727242	47727441	200	47727275	7	6.16097	4.73429	2.31281	Promoter	(GA)n|Simple_repeat|Simple_repeat		Ccnd3	NM_007632
APP	chr17	50843775	50844033	259	50843857	9	6.3968	4.64609	2.49375	Intergenic	L1Md_F2|LINE|L1		Btg3;Plcl2;Tbc1d5	NM_001285991;NM_001297747;NM_001285993;NM_028162;NM_013880
APP	chr17	51855942	51856141	200	51856097	10	8.00362	5.50357	3.78597	Intergenic	L1Md_F2|LINE|L1		Satb1	NM_009122;NM_001163630;NM_001163631;NM_001163632
APP	chr17	51856547	51856878	332	51856713	11	6.0447	4.10877	2.31281	Intergenic	L1Md_F2|LINE|L1		Satb1	NM_009122;NM_001163630;NM_001163631;NM_001163632
APP	chr17	52517441	52517640	200	52517509	8	7.28	5.32607	3.17509	Intergenic	L1Md_A|LINE|L1
APP	chr17	53944308	53944507	200	53944450	7	5.81683	4.52429	2.11363	Intergenic	L1Md_F3|LINE|L1		Sult1c2;4932415M13Rik	NM_026935;NR_073205
APP	chr17	54398287	54398486	200	54398324	7	6.16097	4.73429	2.31281	Intergenic	L1Md_A|LINE|L1		1700025K24Rik;Slc5a7	NM_022025;NR_045825
APP	chr17	57510250	57510563	314	57510441	10	9.1658	6.2209	4.81433	Intron	L1Md_T|LINE|L1		Emr1	NM_010130
APP	chr17	59272956	59273155	200	59273125	8	7.28	5.32607	3.17509	Intergenic	Intergenic
APP	chr17	61228558	61228757	200	61228659	8	6.54678	4.8779	2.62118	Intergenic	L1Md_T|LINE|L1
APP	chr17	62090474	62090673	200	62090521	8	7.27152	5.32101	3.17509	Intergenic	L1Md_T|LINE|L1
APP	chr17	62725612	62725811	200	62725765	8	6.88952	5.08983	2.88239	Intergenic	L1Md_A|LINE|L1
APP	chr17	63907161	63907375	215	63907220	9	6.3968	4.64609	2.49375	Intergenic	L1Md_T|LINE|L1		Fbxl17	NM_015794
APP	chr17	64277966	64278175	210	64278075	10	9.64919	6.50965	5.25569	Intron	intron (NM_001037997, intron 6 of 17)		Fert2	NM_001037997;NM_001286415
APP	chr17	65439262	65439523	262	65439386	9	8.00723	5.65536	3.78597	Intergenic	L1Md_T|LINE|L1
APP	chr17	65489210	65489409	200	65489293	9	5.29738	3.94249	1.75791	Intergenic	L1Md_T|LINE|L1
APP	chr17	66884513	66884712	200	66884580	8	7.28	5.32607	3.17509	Intergenic	(CA)n|Simple_repeat|Simple_repeat		Mtcl1;Rab12;Themis3	NM_172963;NM_001114098;NM_024448;NM_028998
APP	chr17	68857865	68858068	204	68857927	10	7.38071	5.1107	3.24811	Intron	L1Md_T|LINE|L1		L3mbtl4	NM_177278
APP	chr17	74460976	74461248	273	74461137	8	6.88952	5.08983	2.88239	Intergenic	L1Md_T|LINE|L1		Srd5a2	NM_053188
APP	chr17	75825450	75825758	309	75825513	8	5.45343	4.18148	1.87107	Intergenic	L1Md_T|LINE|L1		Rasgrp3;Ltbp1	NM_001166493;NM_206958;NM_207246;NM_019919
APP	chr17	76615241	76615440	200	76615319	8	6.88952	5.08983	2.88239	Intergenic	L1Md_T|LINE|L1
APP	chr17	77297634	77297878	245	77297803	12	7.9867	5.12524	3.78597	Intergenic	L1Md_A|LINE|L1
APP	chr17	79808194	79808610	417	79808283	11	8.73073	5.78167	4.42486	Intergenic	L1Md_T|LINE|L1		Cdc42ep3;4930429F11Rik;Gm10494	NM_026514;NR_033462;NR_033463
APP	chr17	80277595	80277872	278	80277703	15	5.5281	3.30499	1.91902	Intron	(CA)n|Simple_repeat|Simple_repeat		Atl2	NM_178050;NM_001286647;NM_019717
APP	chr17	81643009	81643287	279	81643131	13	10.1827	6.28036	5.76088	Intergenic	L1Md_T|LINE|L1
APP	chr17	82402558	82402927	370	82402742	10	9.64919	6.50965	5.25569	Intergenic	L1Md_T|LINE|L1
APP	chr17	82928595	82928794	200	82928667	7	5.81683	4.52429	2.11363	Intergenic	L1Md_T|LINE|L1
APP	chr17	83819391	83819677	287	83819428	8	6.88952	5.08983	2.88239	Intron	L1Md_F2|LINE|L1		Eml4	NM_199466;NM_001114361;NM_001114362;NM_001286567
APP	chr17	84700493	84700692	200	84700632	9	8.44414	5.91786	4.15533	Intron	intron (NM_183021, intron 29 of 37)		Thada	NM_183021
APP	chr17	85769107	85769432	326	85769262	13	13.4775	8.285	8.92125	Intron	intron (NM_028576, intron 3 of 10)		Camkmt	NM_028576
APP	chr17	86968273	86968493	221	86968325	8	7.28	5.32607	3.17509	Intron	(TTTC)n|Simple_repeat|Simple_repeat		Prkce	NM_011104
APP	chr17	88851918	88852117	200	88851995	7	6.16097	4.73429	2.31281	Intron	L1Md_F2|LINE|L1		Foxn2	NM_180974
APP	chr17	90425944	90426143	200	90425999	6	5.02468	4.1013	1.60528	Intergenic	L1_Mus2|LINE|L1		Nrxn1	NM_020252;NM_177284
APP	chr17	93896145	93896357	213	93896285	14	9.94237	5.91374	5.53008	Intergenic	L1Md_T|LINE|L1
APP	chr17	94294529	94294775	247	94294611	14	11.6609	6.96913	7.16209	Intergenic	L1Md_F|LINE|L1
APP	chr17	94423475	94423674	200	94423553	11	7.05525	4.73099	3.02535	Intergenic	L1Md_F2|LINE|L1
APP	chr17	94991254	94991453	200	94991305	7	6.15349	4.72978	2.31281	Intergenic	L1_Mus1|LINE|L1
APP	chr18	4024680	4024888	209	4024760	12	7.9867	5.12524	3.78597	Intergenic	L1Md_T|LINE|L1
APP	chr18	4495454	4495779	326	4495584	8	6.88952	5.08983	2.88239	Intergenic	L1Md_T|LINE|L1		Mtpap	NM_026157
APP	chr18	6384864	6385063	200	6384954	7	6.16097	4.73429	2.31281	Intergenic	(TTTC)n|Simple_repeat|Simple_repeat		Epc1	NM_027497;NM_007935
APP	chr18	8166012	8166367	356	8166246	9	8.00723	5.65536	3.78597	Intergenic	L1Md_F2|LINE|L1
APP	chr18	11186535	11186734	200	11186717	10	6.15787	4.33674	2.31281	Intergenic	L1Md_T|LINE|L1
APP	chr18	12513025	12513304	280	12513246	6	5.08572	4.13856	1.60528	Intron	L1Md_T|LINE|L1		Lama3	NM_010680
APP	chr18	12708259	12708667	409	12708469	11	10.3617	6.78644	5.92478	Intron	intron (NM_010680, intron 62 of 74)		Lama3	NM_010680
APP	chr18	14115714	14115914	201	14115765	10	9.64919	6.50965	5.25569	Intron	(TTAGGG)n|Simple_repeat|Simple_repeat		Zfp521	NM_145492
APP	chr18	15686491	15686690	200	15686585	7	6.16097	4.73429	2.31281	Intron	L1_Mm|LINE|L1		Chst9	NM_199055
APP	chr18	17596958	17597162	205	17597004	10	7.67996	5.29986	3.51865	Intergenic	L1Md_A|LINE|L1
APP	chr18	18978912	18979139	228	18979023	11	9.47285	6.24389	5.10036	Intergenic	L1Md_T|LINE|L1
APP	chr18	19509739	19509973	235	19509830	7	6.16097	4.73429	2.31281	Intergenic	MERVL-int|LTR|ERVL
APP	chr18	19511979	19512232	254	19512121	10	9.1658	6.2209	4.81433	Intergenic	L1Md_A|LINE|L1
APP	chr18	19971293	19971492	200	19971410	7	6.16097	4.73429	2.31281	Intergenic	L1Md_T|LINE|L1
APP	chr18	19971737	19972104	368	19972022	8	6.88952	5.08983	2.88239	Intergenic	L1Md_T|LINE|L1
APP	chr18	20155527	20155934	408	20155886	9	7.62344	5.41989	3.46838	Intron	(GAAA)n|Simple_repeat|Simple_repeat		Dsc3	NM_007882;NM_001291809
APP	chr18	20462400	20462631	232	20462568	11	5.24649	3.63119	1.72439	Intergenic	L1Md_Gf|LINE|L1		Dsg1a;Dsg1b;Dsg1c	NM_010079;NM_181680;NM_181682
APP	chr18	20523594	20524024	431	20523860	9	8.44414	5.91786	4.15533	Intergenic	L1_Mus1|LINE|L1		Dsg1a;Dsg1b;Dsg1c;Dsg4	NM_010079;NM_181564;NM_181680;NM_181682
APP	chr18	21573367	21573576	210	21573490	9	6.3968	4.64609	2.49375	Intergenic	L1Md_F2|LINE|L1
APP	chr18	24905293	24905517	225	24905387	10	9.1658	6.2209	4.81433	Intron	intron (NM_175276, intron 1 of 26)		Fhod3	NM_001289655;NM_001289654;NM_175276
APP	chr18	26444715	26444947	233	26444873	6	5.0922	4.1425	1.60528	Intergenic	L1_Mus3|LINE|L1
APP	chr18	26726279	26726478	200	26726338	9	8.44414	5.91786	4.15533	Intergenic	(TG)n|Simple_repeat|Simple_repeat
APP	chr18	27968241	27968520	280	27968418	11	10.3617	6.78644	5.92478	Intergenic	L1Md_F2|LINE|L1
APP	chr18	28173341	28173540	200	28173375	7	5.81683	4.52429	2.11363	Intergenic	L1Md_T|LINE|L1
APP	chr18	29363447	29363686	240	29363507	8	5.45343	4.18148	1.87107	Intergenic	L1Md_T|LINE|L1
APP	chr18	29714555	29714767	213	29714593	7	4.35969	3.58878	1.2314	Intergenic	L1Md_F|LINE|L1		4930527G23Rik;4930578E11Rik	NR_045395;NR_045391
APP	chr18	29809899	29810248	350	29810040	11	10.3617	6.78644	5.92478	Intergenic	(CA)n|Simple_repeat|Simple_repeat
APP	chr18	30135353	30135552	200	30135378	7	6.16097	4.73429	2.31281	Intergenic	L1Md_T|LINE|L1
APP	chr18	31662856	31663156	301	31663001	9	8.00723	5.65536	3.78597	Intergenic	L1Md_A|LINE|L1		Syt4;Slc25a46	NM_026165;NM_009308
APP	chr18	32844155	32844371	217	32844248	12	7.9867	5.12524	3.78597	Intron	L1Md_T|LINE|L1		4930455D15Rik	NR_045381
APP	chr18	33173348	33173555	208	33173403	8	5.95334	4.50292	2.23333	Intron	L1Md_T|LINE|L1		Camk4	NM_009793
APP	chr18	37020351	37020596	246	37020430	9	8.44414	5.91786	4.15533	Intergenic	L1Md_T|LINE|L1		Pcdha2;Pcdha3;Wdr55;Pcdha1;Pcdha4;Gm6756;Pcdha5;Pcdha4-g;Dnd1;Vaultrc5;Zmat2;Hars;Hars2	NM_025594;NM_080636;NM_173383;NM_007766;NM_026464;NR_076393;NM_198117;NM_009959;NM_138662;NM_054072;NR_027885;NM_001174154;NM_008214
APP	chr18	40425469	40425668	200	40425504	7	6.16097	4.73429	2.31281	Intron	intron (NM_026135, intron 1 of 1)		Kctd16	NM_026135
APP	chr18	40812072	40812406	335	40812125	9	7.62344	5.41989	3.46838	Intergenic	L1Md_T|LINE|L1
APP	chr18	41541739	41542264	526	41541891	8	5.45343	4.18148	1.87107	Intergenic	L1Md_T|LINE|L1
APP	chr18	41672674	41672873	200	41672800	8	6.88952	5.08983	2.88239	Intergenic	L1Md_A|LINE|L1
APP	chr18	41984245	41984449	205	41984311	11	7.81062	5.20383	3.64028	Intergenic	L1Md_T|LINE|L1		Prelid2	NM_029942
APP	chr18	43575503	43575702	200	43575653	11	9.08633	6.0039	4.75444	Intron	CT-rich|Low_complexity|Low_complexity		Dpysl3	NM_001291455
APP	chr18	43875508	43875734	227	43875694	9	5.29738	3.94249	1.75791	Intergenic	L1Md_T|LINE|L1		Jakmip2;Gm94;Spink3;Scgb3a2	NM_001289644;NM_009258;NM_001163637;NM_001033280;NM_001289643
APP	chr18	44859606	44859883	278	44859770	7	5.81683	4.52429	2.11363	Intron	L1Md_F2|LINE|L1		Mcc	NM_001085373
APP	chr18	44939547	44939791	245	44939664	14	8.64403	5.13596	4.34319	Intron	(GGAGAA)n|Simple_repeat|Simple_repeat		Mcc	NM_001085373
APP	chr18	45190577	45190786	210	45190680	9	6.3968	4.64609	2.49375	Intergenic	L1Md_A|LINE|L1
APP	chr18	48169936	48170299	364	48170112	87	13.6643	2.47396	9.10289	Intron	(CCCTAA)n|Simple_repeat|Simple_repeat		G630055G22Rik	NR_045404
APP	chr18	48837434	48837715	282	48837535	8	6.54678	4.8779	2.62118	Intergenic	L1Md_A|LINE|L1
APP	chr18	50780383	50780613	231	50780430	9	6.3968	4.64609	2.49375	Intergenic	L1Md_F|LINE|L1		Hdhd1a	NM_026108
APP	chr18	50943584	50943810	227	50943623	9	8.13047	5.73005	3.90141	Intergenic	L1Md_T|LINE|L1
APP	chr18	51820134	51820333	200	51820309	8	6.54678	4.8779	2.62118	Intergenic	L1Md_Gf|LINE|L1
APP	chr18	51857073	51857272	200	51857185	10	8.74089	5.96188	4.42832	Intergenic	L1Md_A|LINE|L1
APP	chr18	59078761	59078960	200	59078812	8	5.45343	4.18148	1.87107	Intron	L1Md_T|LINE|L1		Adamts19	NM_175506
APP	chr18	66787562	66787923	362	66787749	9	8.44414	5.91786	4.15533	Intergenic	L1Md_F2|LINE|L1
APP	chr18	67100740	67100948	209	67100877	9	6.3968	4.64609	2.49375	Intron	L1Md_A|LINE|L1		Gm19784	NR_040461
APP	chr18	68237492	68237707	216	68237607	9	8.44414	5.91786	4.15533	Intron	L1Md_F2|LINE|L1		Ldlrad4	NM_172631
APP	chr18	69199703	69199948	246	69199855	8	6.88952	5.08983	2.88239	Intergenic	L1Md_F|LINE|L1		4930546C10Rik;Mir145b	NR_038051;NR_105780
APP	chr18	69542138	69542345	208	69542236	9	8.44414	5.91786	4.15533	Intron	(CA)n|Simple_repeat|Simple_repeat		Tcf4	NM_013685;NM_001083967
APP	chr18	70311349	70311548	200	70311436	6	4.7943	3.95876	1.46767	Intergenic	L1Md_F3|LINE|L1		Rab27b;Dynap	NM_001082553;NM_029346;NM_030554
APP	chr18	70369522	70369721	200	70369574	7	4.55469	3.71687	1.33676	Intergenic	L1Md_F2|LINE|L1		Rab27b;Dynap	NM_001082553;NM_029346
APP	chr18	71299360	71299624	265	71299492	9	8.43465	5.91223	4.15533	Intergenic	L1Md_T|LINE|L1
APP	chr18	71701265	71701491	227	71701399	11	8.40176	5.5753	4.14211	Intron	Lx7|LINE|L1		Dcc	NM_007831
APP	chr18	72786866	72787101	236	72786989	7	6.15349	4.72978	2.31281	Intergenic	L1Md_A|LINE|L1
APP	chr18	73040573	73040772	200	73040736	8	7.28	5.32607	3.17509	Intergenic	L1Md_T|LINE|L1
APP	chr18	76836103	76836302	200	76836232	11	8.73073	5.78167	4.42486	Intergenic	Intergenic
APP	chr18	79357497	79357794	298	79357650	7	6.16097	4.73429	2.31281	Intergenic	L1Md_F2|LINE|L1		Setbp1	NM_053099
APP	chr18	79804169	79804379	211	79804214	8	7.23131	5.29695	3.17509	Intergenic	L1Md_T|LINE|L1
APP	chr18	79923616	79923863	248	79923713	11	8.40176	5.5753	4.14211	Intergenic	L1Md_A|LINE|L1
APP	chr18	80704143	80704371	229	80704241	9	6.66638	4.81806	2.73012	Intergenic	L1Md_T|LINE|L1		Nfatc1;Gm2176;Ctdp1	NM_001164110;NM_001164111;NM_001164112;NR_028424;NM_198429;NM_026295
APP	chr18	85343776	85343986	211	85343917	11	9.89567	6.50387	5.48726	Intergenic	L1Md_T|LINE|L1
APP	chr18	87318868	87319124	257	87319003	7	6.15349	4.72978	2.31281	Intergenic	L1Md_A|LINE|L1
APP	chr18	88123910	88124124	215	88123972	11	7.05525	4.73099	3.02535	Intergenic	L1Md_A|LINE|L1
APP	chr18	90771507	90772031	525	90771772	387	58.6647	2.57942	52.9631	Intergenic	(TTAGGG)n|Simple_repeat|Simple_repeat		Tmx3	NM_198295
APP	chr19	8101112	8101311	200	8101167	7	6.16097	4.73429	2.31281	Intergenic	L1Md_T|LINE|L1		Slc22a28;Slc22a27	NM_134256;NM_001013820
APP	chr19	10726761	10726960	200	10726826	10	7.38071	5.1107	3.24811	Promoter	L1MEe|LINE|L1		4930524O05Rik	NR_045316
APP	chr19	11183195	11183401	207	11183268	10	8.35562	5.72357	4.11055	Intron	(TTC)n|Simple_repeat|Simple_repeat		1700017D01Rik	NM_027058
APP	chr19	12444842	12445154	313	12445041	9	8.00723	5.65536	3.78597	Intergenic	L1Md_A|LINE|L1		Dtx4;Mpeg1;Olfr1440;Olfr1441;Olfr1433;Olfr1437;Olfr1436;Pfpl;Olfr1434	NM_019540;NM_001011839;NM_172442;NM_146683;NM_146684;NM_146685;NM_146687;NM_010821;NM_207626
APP	chr19	14339717	14339916	200	14339836	6	5.0922	4.1425	1.60528	Intergenic	L1Md_T|LINE|L1
APP	chr19	18365224	18365451	228	18365284	8	7.27152	5.32101	3.17509	Intergenic	L1Md_T|LINE|L1
APP	chr19	22007507	22007977	471	22007886	10	7.38071	5.1107	3.24811	Intergenic	L1Md_F|LINE|L1		Tmem2	NM_031997;NM_001033759
APP	chr19	22055165	22055375	211	22055282	9	7.62344	5.41989	3.46838	Intergenic	L1Md_T|LINE|L1
APP	chr19	22913831	22914056	226	22913923	9	8.00723	5.65536	3.78597	Intron	L1Md_A|LINE|L1		Trpm3	NM_177341;NM_001035239;NM_001035241;NM_001035240;NM_001035243;NM_001035242;NM_001035244
APP	chr19	25895191	25895390	200	25895221	7	6.16097	4.73429	2.31281	Intergenic	L1Md_F2|LINE|L1
APP	chr19	30681477	30681676	200	30681614	8	5.45343	4.18148	1.87107	Intron	L1Md_A|LINE|L1		Prkg1	NM_001013833;NM_011160
APP	chr19	30836447	30836687	241	30836538	10	9.1658	6.2209	4.81433	Intron	L1Md_T|LINE|L1		Prkg1	NM_001013833;NM_011160
APP	chr19	34181439	34181639	201	34181513	9	6.66638	4.81806	2.73012	Intron	L1Md_A|LINE|L1		Lipm	NM_023903
APP	chr19	37825411	37825610	200	37825469	7	5.81683	4.52429	2.11363	Intergenic	L1Md_F2|LINE|L1		Exoc6;Cyp26a1;Cyp26c1	NM_007811;NM_175353;NM_001105201
APP	chr19	39489680	39489994	315	39489846	12	9.45707	6.03991	5.0882	Intron	L1Md_A|LINE|L1		Cyp2c38	NM_010002
APP	chr19	40204147	40204408	262	40204227	10	9.1658	6.2209	4.81433	Intergenic	L1Md_F2|LINE|L1		Cyp2c50;Pdlim1;Cyp2c54;Cyp2c70	NM_016861;NM_206537;NM_001167877;NM_001167875;NM_134144;NM_145499
APP	chr19	41728504	41728892	389	41728750	11	10.3617	6.78644	5.92478	Intron	(CA)n|Simple_repeat|Simple_repeat		Slit1	NM_015748
APP	chr19	43077521	43077735	215	43077615	9	8.00723	5.65536	3.78597	Intron	L1Md_T|LINE|L1		Hpse2	NM_001081257
APP	chr19	43151295	43151494	200	43151323	9	6.3968	4.64609	2.49375	Intron	L1Md_T|LINE|L1		Hpse2	NM_001081257
APP	chr19	44094998	44095268	271	44095189	13	10.5442	6.50452	6.0968	Intron	(CA)n|Simple_repeat|Simple_repeat		Cyp2c44	NM_001167905;NM_001001446
APP	chr19	49053248	49053450	203	49053271	8	5.95334	4.50292	2.23333	Intergenic	Intergenic
APP	chr19	49146580	49146797	218	49146724	7	6.16097	4.73429	2.31281	Intergenic	L1Md_T|LINE|L1
APP	chr19	49254516	49254715	200	49254550	9	8.43465	5.91223	4.15533	Intergenic	L1Md_A|LINE|L1
APP	chr19	50461148	50461347	200	50461287	7	6.16097	4.73429	2.31281	Intron	L1Md_A|LINE|L1		Sorcs1	NM_001290356;NM_021377;NM_001252501
APP	chr19	51188380	51188579	200	51188443	9	6.14655	4.48597	2.31281	Intergenic	L1Md_T|LINE|L1
APP	chr19	51773173	51773417	245	51773357	10	9.1658	6.2209	4.81433	Intergenic	L1Md_T|LINE|L1
APP	chr19	54260155	54260354	200	54260284	10	7.38071	5.1107	3.24811	Intergenic	(TG)n|Simple_repeat|Simple_repeat
APP	chr2	3761222	3761487	266	3761377	10	7.38071	5.1107	3.24811	Intergenic	L1Md_T|LINE|L1		Fam107b	NM_025626
APP	chr2	6762831	6763078	248	6762957	10	8.35562	5.72357	4.11055	Intron	L1Md_T|LINE|L1		Celf2	NM_010160;NM_001110232;NM_001160292;NM_001110230;NM_001110231;NM_001110229;NM_001110228;NM_001160293
APP	chr2	6914279	6914684	406	6914312	7	5.81683	4.52429	2.11363	Intron	L1Md_F2|LINE|L1		Celf2	NM_001110229;NM_001110232;NM_001160292;NM_001110230;NM_001110231
APP	chr2	7338449	7338679	231	7338513	16	8.34669	4.60853	4.10707	Intergenic	L1Md_T|LINE|L1		Celf2	NM_001110232;NM_001110231
APP	chr2	13786663	13786866	204	13786807	8	7.28	5.32607	3.17509	Intergenic	RLTR10-int|LTR|ERVK		St8sia6	NM_145838
APP	chr2	13870267	13870473	207	13870339	10	7.38071	5.1107	3.24811	Intergenic	L1Md_T|LINE|L1		Ptpla	NM_001012396;NM_013935
APP	chr2	16686907	16687200	294	16687018	7	6.16097	4.73429	2.31281	Intergenic	L1Md_T|LINE|L1		Plxdc2	NM_026162
APP	chr2	19129896	19130154	259	19130070	11	8.40176	5.5753	4.14211	Intron	L1Md_F2|LINE|L1		Armc3	NM_001081083;NM_001271564;NM_001271565;NM_001271563
APP	chr2	19251557	19251756	200	19251624	13	10.5442	6.50452	6.0968	Intergenic	(CA)n|Simple_repeat|Simple_repeat		Armc3;Msrb2	NM_001081083;NM_029619;NM_001271564;NM_001271565;NM_001271563
APP	chr2	19878786	19879043	258	19878938	11	8.40176	5.5753	4.14211	Intergenic	L1Md_T|LINE|L1
APP	chr2	20122778	20123013	236	20122900	9	8.44414	5.91786	4.15533	Intergenic	L1Md_F|LINE|L1		Etl4	NM_001081006
APP	chr2	21922606	21922805	200	21922687	6	4.7943	3.95876	1.46767	Intergenic	L1Md_A|LINE|L1
APP	chr2	22443111	22443529	419	22443287	160	21.1501	2.33372	16.4702	Intron	intron (NM_148413, intron 30 of 33)		Myo3a	NM_148413
APP	chr2	22445461	22445822	362	22445641	150	21.3272	2.4176	16.6457	Intron	intron (NM_148413, intron 30 of 33)		Myo3a	NM_148413
APP	chr2	23770865	23771065	201	23771016	7	6.16097	4.73429	2.31281	Intergenic	L1Md_F3|LINE|L1		Hnmt	NM_080462
APP	chr2	23808275	23808531	257	23808433	14	12.5308	7.50487	8.00196	Intergenic	L1Md_T|LINE|L1		Hnmt	NM_080462
APP	chr2	26617575	26617774	200	26617620	12	9.12349	5.83176	4.78899	Intergenic	L1Md_F2|LINE|L1		Lcn4;Abo	NM_030718;NM_001290444;NM_010695
APP	chr2	34156819	34157018	200	34156949	7	5.81683	4.52429	2.11363	Intron	intron (NM_016768, intron 2 of 8)		Pbx3	NM_016768;NM_001290576
APP	chr2	36534156	36534370	215	36534252	6	4.7943	3.95876	1.46767	Intergenic	L1Md_T|LINE|L1		Olfr347;Olfr346;Olfr345	NM_146943;NM_146938;NM_146945
APP	chr2	37026047	37026250	204	37026130	11	8.40176	5.5753	4.14211	Intergenic	L1Md_T|LINE|L1		Olfr361;Olfr367-ps;Olfr362;Olfr365;Olfr366	NM_147051;NM_146662;NM_001081010;NM_001005569;NM_146368
APP	chr2	40121231	40121555	325	40121390	8	7.28	5.32607	3.17509	Intergenic	L1Md_A|LINE|L1
APP	chr2	41904663	41904862	200	41904817	6	5.08572	4.13856	1.60528	Intron	L1Md_A|LINE|L1		Lrp1b	NM_053011
APP	chr2	41942023	41942333	311	41942186	8	7.28	5.32607	3.17509	Intron	Lx3C|LINE|L1		Lrp1b	NM_053011
APP	chr2	43161748	43161951	204	43161824	8	7.28	5.32607	3.17509	Intergenic	L1Md_F2|LINE|L1
APP	chr2	46122367	46122855	489	46122510	10	9.1658	6.2209	4.81433	Intergenic	L1Md_A|LINE|L1
APP	chr2	46874366	46874721	356	46874613	9	6.3968	4.64609	2.49375	Intergenic	L1Md_T|LINE|L1
APP	chr2	51129134	51129333	200	51129224	8	7.27152	5.32101	3.17509	Intron	intron (NR_040636, intron 1 of 2)		Gm13497	NR_040636
APP	chr2	53418196	53418405	210	53418323	8	6.54678	4.8779	2.62118	Intergenic	L1Md_A|LINE|L1
APP	chr2	53891622	53891992	371	53891799	9	6.3968	4.64609	2.49375	Intergenic	L1Md_A|LINE|L1		Rprm	NM_023396
APP	chr2	53918630	53918833	204	53918716	8	6.88952	5.08983	2.88239	Intergenic	L1Md_T|LINE|L1		Rprm	NM_023396
APP	chr2	55478198	55478412	215	55478328	10	7.38071	5.1107	3.24811	Intergenic	L1Md_T|LINE|L1		Kcnj3	NM_008426
APP	chr2	56798278	56798477	200	56798303	6	5.08572	4.13856	1.60528	Intergenic	L1Md_A|LINE|L1
APP	chr2	57407044	57407347	304	57407237	10	5.24289	3.76637	1.72298	Intergenic	L1Md_A|LINE|L1
APP	chr2	57481795	57482205	411	57481958	161	15.2887	2.00257	10.6905	Intergenic	(TTAGGG)n|Simple_repeat|Simple_repeat
APP	chr2	57969707	57969974	268	57969833	11	9.08633	6.0039	4.75444	Intergenic	L1Md_F2|LINE|L1		Gm13546;Galnt5;Cytip;Ermn	NM_029972;NR_045896;NM_139200;NR_045895;NM_172855
APP	chr2	58110903	58111102	200	58110974	11	8.40176	5.5753	4.14211	Intergenic	L1Md_A|LINE|L1		Gm13546;Cytip;Gm13544;Acvr1c	NR_045896;NR_045895;NM_001111030;NM_001033369;NM_139200;NR_040365
APP	chr2	66847312	66847531	220	66847369	9	7.27567	5.20324	3.17509	Intergenic	L1Md_T|LINE|L1
APP	chr2	73480078	73480379	302	73480173	7	5.81683	4.52429	2.11363	Intron	L1Md_F2|LINE|L1		Chn1	NM_001113246;NM_001166603;NM_175752;NM_001166604
APP	chr2	75338584	75338817	234	75338709	7	5.24211	4.16259	1.72298	Intergenic	L1Md_F2|LINE|L1		9430019J16Rik	NR_040635
APP	chr2	79308541	79308808	268	79308702	9	6.3968	4.64609	2.49375	Intergenic	L1Md_F3|LINE|L1		Cerkl;Neurod1	NM_001048176;NM_010894
APP	chr2	80801183	80801413	231	80801308	11	9.89567	6.50387	5.48726	Intergenic	L1Md_T|LINE|L1
APP	chr2	80842303	80842502	200	80842408	10	8.35562	5.72357	4.11055	Intergenic	L1Md_T|LINE|L1
APP	chr2	80995880	80996179	300	80995936	8	6.88952	5.08983	2.88239	Intergenic	L1Md_A|LINE|L1
APP	chr2	81200915	81201124	210	81201044	7	6.16097	4.73429	2.31281	Intergenic	L1Md_F2|LINE|L1
APP	chr2	82333009	82333208	200	82333065	7	6.11804	4.7084	2.31281	Intergenic	L1Md_T|LINE|L1
APP	chr2	82334553	82334752	200	82334656	7	5.81683	4.52429	2.11363	Intergenic	L1Md_T|LINE|L1
APP	chr2	83215482	83215686	205	83215578	11	8.096	5.38316	3.86852	Intergenic	L1Md_A|LINE|L1
APP	chr2	83926310	83926509	200	83926344	7	6.16097	4.73429	2.31281	Intergenic	L1Md_T|LINE|L1
APP	chr2	84760820	84761038	219	84760934	12	12.1686	7.69322	7.65191	Intergenic	(TG)n|Simple_repeat|Simple_repeat		Prg3;Prg2;Timm10;P2rx3;Slc43a3;Smtnl1;Slc43a1;Rtn4rl2	NM_021398;NM_001081349;NM_001083809;NM_016914;NM_008920;NM_145526;NM_199223;NM_013899;NM_024230;NM_024497
APP	chr2	85138792	85138991	200	85138937	10	8.74089	5.96188	4.42832	Intergenic	L1Md_T|LINE|L1		Olfr988;Olfr987	NM_001011534;NM_001011785
APP	chr2	87749995	87750299	305	87750008	9	5.29738	3.94249	1.75791	Intergenic	L1Md_T|LINE|L1		Olfr1158;Olfr1160;Olfr1148;Olfr1154;Olfr1155;Olfr1145;Olfr1157;Olfr1151;Olfr1152;Olfr1153;Olfr74;Olfr1156	NM_146638;NM_146320;NM_001011834;NM_001011519;NM_054091;NM_146849;NM_146649;NM_146645;NM_146647;NM_146640;NM_146817;NM_146643
APP	chr2	88083114	88083318	205	88083164	13	9.52851	5.8754	5.15322	Intergenic	L1Md_T|LINE|L1		Olfr1173;Olfr1167;Olfr1176;Olfr1168;Olfr1170	NM_207566;NM_146531;NM_146532;NM_146771;NM_146294
APP	chr2	88273136	88273335	200	88273147	7	5.81683	4.52429	2.11363	Intergenic	L1Md_F2|LINE|L1		Olfr1180;Olfr1176;Olfr1183;Olfr1182;Olfr1178;Olfr1179;Olfr1186;Olfr1184;Olfr1181	NM_146918;NM_146530;NM_146823;NM_146529;NM_001011868;NM_001011816;NM_146917;NM_001011535;NM_146771
APP	chr2	88549710	88549921	212	88549885	10	6.15787	4.33674	2.31281	Intergenic	L1Md_T|LINE|L1		Olfr1198;Olfr1199;Olfr1200;Olfr1201;Olfr1193;Olfr1195;Olfr1196;Olfr1197	NM_146464;NM_207567;NM_001011517;NM_146753;NM_001005227;NM_001005225;NM_146895;NM_146458
APP	chr2	89534868	89535067	200	89535015	7	6.16097	4.73429	2.31281	Intergenic	L1Md_A|LINE|L1		Olfr1247;Olfr1253;Olfr1252;Olfr1251;Olfr1250;Olfr1248;Olfr1249;Olfr1254	NM_001011796;NM_146476;NM_146373;NM_146965;NM_146966;NM_207568;NM_146791;NM_001011529
APP	chr2	89555553	89555752	200	89555603	6	5.0922	4.1425	1.60528	Intergenic	L1Md_A|LINE|L1		Olfr1254;Olfr1253;Olfr1252;Olfr1251;Olfr1250;Olfr1248;Olfr1249	NM_001011796;NM_146476;NM_146965;NM_146373;NM_207568;NM_146791;NM_001011529
APP	chr2	89971910	89972109	200	89972047	7	5.81683	4.52429	2.11363	Intergenic	L1Md_F2|LINE|L1		Olfr32;Olfr1270;Olfr1269;Olfr140;Olfr1265	NM_010980;NM_146343;NM_146342;NM_146985;NM_020515
APP	chr2	94552768	94552967	200	94552904	10	8.00362	5.50357	3.78597	Intergenic	L1Md_F2|LINE|L1
APP	chr2	95489043	95489242	200	95489091	7	5.81683	4.52429	2.11363	Intergenic	L1Md_Gf|LINE|L1
APP	chr2	95489912	95490146	235	95489953	9	5.29738	3.94249	1.75791	Intergenic	L1Md_Gf|LINE|L1
APP	chr2	95938901	95939249	349	95939019	8	6.54678	4.8779	2.62118	Intergenic	L1Md_A|LINE|L1
APP	chr2	96217823	96218283	461	96218127	10	9.64919	6.50965	5.25569	Intron	L1Md_A|LINE|L1		Lrrc4c	NM_001289743;NM_001289742
APP	chr2	97680088	97680393	306	97680202	8	6.88952	5.08983	2.88239	Intergenic	L1Md_A|LINE|L1
APP	chr2	98080988	98081205	218	98081137	8	5.45343	4.18148	1.87107	Intergenic	L1Md_F2|LINE|L1
APP	chr2	100610625	100610824	200	100610697	7	6.16097	4.73429	2.31281	Intergenic	L1Md_A|LINE|L1
APP	chr2	102446124	102446548	425	102446201	8	7.28	5.32607	3.17509	Intron	L1Md_A|LINE|L1		Pamr1	NM_173749
APP	chr2	105898070	105898271	202	105898169	10	9.1658	6.2209	4.81433	Intergenic	Lx7|LINE|L1		Immp1l;Dnajc24	NM_028260;NM_026992;NR_033993
APP	chr2	107374007	107374206	200	107374190	6	5.05502	4.11985	1.60528	Intergenic	L1Md_F2|LINE|L1
APP	chr2	108452986	108453194	209	108453095	12	9.45707	6.03991	5.0882	Intergenic	L1Md_T|LINE|L1
APP	chr2	109420151	109420443	293	109420260	8	6.88952	5.08983	2.88239	Intergenic	Intergenic		Bdnf	NM_001285419;NM_001285418;NM_001048139;NM_007540;NM_001285416
APP	chr2	110133785	110133989	205	110133816	65	11.152	2.54163	6.67529	Intron	intron (NM_130452, intron 2 of 6)		Bbox1	NM_130452
APP	chr2	110422900	110423133	234	110423008	11	8.40176	5.5753	4.14211	Intergenic	L1Md_T|LINE|L1		Slc5a12;Ano3	NM_001128103;NM_001003915;NM_001177624
APP	chr2	111562457	111562658	202	111562549	11	8.096	5.38316	3.86852	Intergenic	L1Md_A|LINE|L1		Olfr1301;Olfr1303;Olfr1302;Olfr1300-ps1;Olfr1299;Olfr1298	NM_146886;NM_146887;NM_146884;NM_146889;NM_146402;NR_033534
APP	chr2	112003894	112004093	200	112004049	8	7.28	5.32607	3.17509	Intergenic	L1Md_F|LINE|L1		Olfr1318;Olfr1316;Olfr1317;Olfr1314;Olfr1313;Nop10;Lpcat4;Nutm1	NM_172521;NM_207206;NM_146448;NM_001011802;NM_146742;NM_146450;NM_025403;NM_207150
APP	chr2	113696847	113697046	200	113696870	11	8.40176	5.5753	4.14211	Intergenic	L1Md_T|LINE|L1		Scg5;Grem1;Arhgap11a	NM_011824;NM_009162;NM_181416
APP	chr2	114981326	114981534	209	114981377	8	7.28	5.32607	3.17509	Intergenic	L1Md_T|LINE|L1
APP	chr2	116359001	116359200	200	116359145	7	6.16097	4.73429	2.31281	Intergenic	L1Md_F|LINE|L1
APP	chr2	122823525	122823724	200	122823682	11	6.0447	4.10877	2.31281	Intergenic	L1Md_T|LINE|L1
APP	chr2	123394701	123394908	208	123394805	9	8.00723	5.65536	3.78597	Intergenic	L1Md_A|LINE|L1
APP	chr2	124708241	124708537	297	124708367	11	10.8917	7.10143	6.42636	Intergenic	L1Md_T|LINE|L1
APP	chr2	132986285	132986484	200	132986389	9	8.44414	5.91786	4.15533	Intergenic	GA-rich|Low_complexity|Low_complexity
APP	chr2	133085698	133085898	201	133085771	10	8.35562	5.72357	4.11055	Intergenic	L1Md_T|LINE|L1
APP	chr2	134440032	134440234	203	134440167	12	9.12349	5.83176	4.78899	Intron	L1Md_A|LINE|L1		Tmx4	NM_029148
APP	chr2	134489409	134489649	241	134489590	8	7.28	5.32607	3.17509	Intergenic	L1Md_T|LINE|L1		Tmx4	NM_029148
APP	chr2	134493734	134493956	223	134493897	10	7.67996	5.29986	3.51865	Intergenic	L1Md_A|LINE|L1		Tmx4	NM_029148
APP	chr2	134829550	134829782	233	134829723	12	6.88037	4.45117	2.88239	Intron	(CA)n|Simple_repeat|Simple_repeat		Plcb1	NM_019677;NM_001145830
APP	chr2	135424911	135425127	217	135424948	9	6.3968	4.64609	2.49375	Intergenic	L1Md_A|LINE|L1		9630028H03Rik	NR_015544
APP	chr2	137999721	137999985	265	137999817	9	8.43465	5.91223	4.15533	Intergenic	L1Md_A|LINE|L1		Btbd3	NM_001025431
APP	chr2	138924706	138924956	251	138924851	11	10.8802	7.09468	6.41806	Intergenic	IAPLTR2_Mm|LTR|ERVK
APP	chr2	142870225	142870434	210	142870277	9	6.3968	4.64609	2.49375	Intergenic	L1Md_A|LINE|L1		Otor;Snrpb2	NM_021335;NM_020595
APP	chr2	143572324	143572539	216	143572459	12	12.1561	7.6859	7.64124	Intron	TTS (NR_040625)		Pcsk2	NM_008792
APP	chr2	144924114	144924313	200	144924297	9	7.62344	5.41989	3.46838	Intergenic	(TTTC)n|Simple_repeat|Simple_repeat
APP	chr2	145066852	145067072	221	145066956	8	4.47711	3.54824	1.32716	Promoter	L1Md_A|LINE|L1		Slc24a3	NM_053195
APP	chr2	145764504	145764726	223	145764600	11	8.40176	5.5753	4.14211	Promoter	(GAA)n|Simple_repeat|Simple_repeat		Crnkl1	NM_025820
APP	chr2	147498863	147499189	327	147499024	9	8.44414	5.91786	4.15533	Intergenic	L1Md_A|LINE|L1		A530006G24Rik	NR_046014
APP	chr2	149012321	149012674	354	149012481	8	7.28	5.32607	3.17509	Intergenic	L1Md_T|LINE|L1
APP	chr2	151022526	151022788	263	151022635	7	6.16097	4.73429	2.31281	Intergenic	L1Md_T|LINE|L1
APP	chr2	151064548	151064768	221	151064620	10	7.38071	5.1107	3.24811	Intergenic	L1Md_Gf|LINE|L1		4930442J19Rik	NR_040747
APP	chr2	151269158	151269361	204	151269274	8	6.23645	4.68292	2.37084	Intergenic	L1Md_F|LINE|L1		4921509C19Rik;Nsfl1c;Fkbp1a	NM_198326;NM_198655;NM_001291074;NM_008019
APP	chr2	151317986	151318198	213	151318037	7	6.15349	4.72978	2.31281	Promoter	(TG)n|Simple_repeat|Simple_repeat		Nsfl1c	NM_198326;NM_001291074
APP	chr2	152443398	152443597	200	152443559	7	5.81683	4.52429	2.11363	Intergenic	L1_Mm|LINE|L1		Mcts2;Rem1;H13;Defb21;Defb45;Defb36;Defb19;Defb29;Defb28;Defb25	NM_001159551;NM_145157;NM_001159553;NM_001039122;NM_001001444;NM_010376;NM_025543;NM_001159552;NM_207276;NM_001037502;NM_001037752;NM_001037247;NM_009047
APP	chr2	153914701	153914900	200	153914717	9	4.47771	3.42398	1.32716	Intergenic	L1Md_T|LINE|L1		Bpifa2;Bpifa3;Bpifa1;Bpifa6;Bpifa5	NM_025990;NM_001291079;NM_028528;NM_008953;NM_001080811;NM_011126
APP	chr2	154800796	154800995	200	154800824	8	6.88952	5.08983	2.88239	Intergenic	L1VL4|LINE|L1		a;Ahcy;Eif2s2	NM_015770;NM_016661;NM_026030
APP	chr2	157876652	157876858	207	157876685	13	6.79314	4.23639	2.84948	Intron	(CATATA)n|Simple_repeat|Simple_repeat		Rprd1b	NM_001291136;NM_001291135;NM_001291134;NM_027434
APP	chr2	159976416	159976672	257	159976503	7	6.16097	4.73429	2.31281	Intergenic	(GAA)n|Simple_repeat|Simple_repeat
APP	chr2	160649074	160649433	360	160649239	10	7.38071	5.1107	3.24811	Intron	L1Md_T|LINE|L1		Zhx3	NM_177263
APP	chr2	161094233	161094432	200	161094256	9	5.29738	3.94249	1.75791	Intergenic	(TG)n|Simple_repeat|Simple_repeat
APP	chr2	161818141	161818362	222	161818209	9	8.43465	5.91223	4.15533	Intron	L1VL2|LINE|L1		Ptprt	NM_001291151;NM_001291150;NM_021464;NM_001291149
APP	chr2	164463257	164463456	200	164463318	9	8.44414	5.91786	4.15533	Intron	intron (NM_001012723, intron 2 of 3)		Wfdc16	NM_001012723
APP	chr2	165737682	165737887	206	165737866	17	8.28911	4.41942	4.05204	Intergenic	(GAAA)n|Simple_repeat|Simple_repeat		Ncoa3;Zmynd8	NM_001252587;NM_001252585;NM_001252584;NM_008679;NM_001291158;NM_027230;NM_001281926
APP	chr2	169443549	169443781	233	169443673	9	8.44414	5.91786	4.15533	Intergenic	Intergenic		Tshz2	NM_080455
APP	chr2	169617644	169617843	200	169617683	10	6.15787	4.33674	2.31281	Intron	HAL1-3A_ME|LINE|L1		Tshz2	NM_080455
APP	chr2	173038675	173039019	345	173038827	10	6.60066	4.61638	2.67229	Intron	TTS (NM_001139519)		Zbp1	NM_021394
APP	chr2	174792355	174792554	200	174792397	10	7.38071	5.1107	3.24811	Intergenic	L1Md_F|LINE|L1		Gm14393	NM_001085546
APP	chr2	175721804	175722010	207	175721911	8	7.28	5.32607	3.17509	Intergenic	L1Md_F|LINE|L1		Gm14308	NM_001099349
APP	chr2	177529807	177530033	227	177529959	10	6.15787	4.33674	2.31281	Intergenic	L1Md_F2|LINE|L1		Gm14325;Gm14322	NM_001024849;NM_001243903
APP	chr2	177581472	177581747	276	177581626	9	8.44414	5.91786	4.15533	Intergenic	L1VL1|LINE|L1		Gm14327;Gm14326;Gm14325;Gm14322	NM_001024849;NM_001282028;NM_001190302;NR_038101;NM_001243903
APP	chr2	177598372	177598612	241	177598465	7	5.81683	4.52429	2.11363	Intergenic	L1_Mus3|LINE|L1		Gm14327;Gm14326;Gm14325;Gm14322	NM_001024849;NM_001282028;NM_001190302;NR_038101;NM_001243903
APP	chr2	178626064	178626263	200	178626144	8	7.27152	5.32101	3.17509	Intergenic	(CA)n|Simple_repeat|Simple_repeat
APP	chr2	181535928	181536127	200	181536041	10	9.1658	6.2209	4.81433	Intron	T-rich|Low_complexity|Low_complexity		Myt1	NM_001171615;NM_008665;NM_001171616;NM_001171680
APP	chr2	181747431	181747993	563	181747756	326	46.991	2.4994	41.8754	Intergenic	(TTAGGG)n|Simple_repeat|Simple_repeat		Gm14496	NM_001205282
APP	chr3	3251608	3251971	364	3251738	9	6.3968	4.64609	2.49375	Intergenic	L1Md_A|LINE|L1
APP	chr3	3435887	3436093	207	3436040	7	6.16097	4.73429	2.31281	Intergenic	L1Md_F2|LINE|L1		Hnf4g	NM_013920
APP	chr3	3724439	3724864	426	3724513	7	5.81683	4.52429	2.11363	Intergenic	L1Md_T|LINE|L1		Hnf4g	NM_013920
APP	chr3	4113478	4113677	200	4113603	11	8.40176	5.5753	4.14211	Intergenic	L1Md_F2|LINE|L1
APP	chr3	4169486	4169711	226	4169633	9	5.29738	3.94249	1.75791	Intergenic	L1Md_T|LINE|L1
APP	chr3	4192046	4192288	243	4192112	12	7.9867	5.12524	3.78597	Intergenic	L1Md_A|LINE|L1
APP	chr3	6309042	6309283	242	6309092	9	5.29738	3.94249	1.75791	Intergenic	L1Md_T|LINE|L1
APP	chr3	6698117	6698316	200	6698196	9	6.3968	4.64609	2.49375	Intergenic	L1Md_A|LINE|L1		1700008P02Rik	NM_027048
APP	chr3	7219273	7219490	218	7219311	15	9.56811	5.47836	5.19029	Intergenic	Intergenic
APP	chr3	9043452	9043651	200	9043610	9	8.00723	5.65536	3.78597	Intergenic	L1_Mus1|LINE|L1		Tpd52;4930539M17Rik	NM_001025262;NM_001025263;NM_001025261;NM_001025264;NM_009412;NR_040597
APP	chr3	11416464	11416704	241	11416628	14	6.76192	4.06635	2.82158	Intergenic	L1Md_F|LINE|L1
APP	chr3	11591656	11592071	416	11591897	6	5.0922	4.1425	1.60528	Intergenic	L1Md_T|LINE|L1
APP	chr3	11592220	11592419	200	11592366	8	6.88952	5.08983	2.88239	Intergenic	L1Md_T|LINE|L1
APP	chr3	11670344	11670543	200	11670392	7	6.16097	4.73429	2.31281	Intergenic	Intergenic
APP	chr3	11793049	11793248	200	11793120	10	7.38071	5.1107	3.24811	Intergenic	L1Md_T|LINE|L1		Gm10745	NR_040751
APP	chr3	12339519	12339718	200	12339601	8	6.88952	5.08983	2.88239	Intergenic	L1Md_T|LINE|L1
APP	chr3	12339881	12340266	386	12340209	10	7.38071	5.1107	3.24811	Intergenic	L1Md_T|LINE|L1
APP	chr3	13970776	13971009	234	13970872	10	6.15787	4.33674	2.31281	Intron	L1Md_A|LINE|L1		Ralyl	NM_001163330;NM_178631;NM_001163328;NM_001163329
APP	chr3	14323856	14324070	215	14323931	11	10.8917	7.10143	6.42636	Intergenic	L1Md_T|LINE|L1		Gm6300	NR_033591
APP	chr3	15308457	15308677	221	15308536	9	6.3968	4.64609	2.49375	Intron	L1Md_A|LINE|L1		Gm9733	NM_001076679
APP	chr3	17310429	17310642	214	17310543	10	9.1658	6.2209	4.81433	Intergenic	L1Md_F2|LINE|L1
APP	chr3	17807151	17807441	291	17807272	12	10.2034	6.50422	5.77985	Intergenic	L1Md_A|LINE|L1		Cypt12	NM_029289
APP	chr3	18248642	18248841	200	18248807	8	4.47711	3.54824	1.32716	Intergenic	L1Md_T|LINE|L1
APP	chr3	18332433	18332970	538	18332602	11	10.8917	7.10143	6.42636	Intergenic	L1Md_T|LINE|L1		4930433B08Rik	NR_040544
APP	chr3	18453888	18454095	208	18454056	8	7.27152	5.32101	3.17509	Intergenic	L1Md_A|LINE|L1		4930433B08Rik	NR_040544
APP	chr3	19363828	19364159	332	19363997	10	9.64919	6.50965	5.25569	Intergenic	L1Md_A|LINE|L1		Dnajc5b	NM_025489;NM_001163537;NM_001163536
APP	chr3	21038537	21038799	263	21038633	8	7.28	5.32607	3.17509	Intergenic	L1Md_F2|LINE|L1
APP	chr3	21180776	21181159	384	21181055	9	8.43465	5.91223	4.15533	Intergenic	L1Md_F2|LINE|L1
APP	chr3	21597228	21597587	360	21597408	91	13.0147	2.35731	8.47138	Intergenic	(TTAGGG)n|Simple_repeat|Simple_repeat
APP	chr3	22357863	22358123	261	22358019	10	9.1658	6.2209	4.81433	Intergenic	L1Md_T|LINE|L1
APP	chr3	22521946	22522248	303	22522246	8	4.47711	3.54824	1.32716	Intergenic	L1Md_T|LINE|L1
APP	chr3	22633512	22633717	206	22633521	9	6.3968	4.64609	2.49375	Intergenic	L1Md_A|LINE|L1
APP	chr3	22853348	22853576	229	22853467	8	6.23645	4.68292	2.37084	Intergenic	L1Md_A|LINE|L1
APP	chr3	28767391	28767634	244	28767478	11	10.3617	6.78644	5.92478	Intergenic	L1Md_T|LINE|L1		Rpl22l1;Gm1527;Eif5a2	NM_177586;NM_026517;NM_001033479
APP	chr3	28989381	28989639	259	28989523	8	7.28	5.32607	3.17509	Intron	L1Md_A|LINE|L1		Egfem1	NM_001167748;NM_029412
APP	chr3	29181797	29182016	220	29181884	8	7.28	5.32607	3.17509	Intron	L1Md_F2|LINE|L1		Egfem1	NM_001167748;NM_029412
APP	chr3	29219591	29219849	259	29219770	10	6.84342	4.77017	2.88239	Intron	L1Md_A|LINE|L1		Egfem1	NM_001167748;NM_029412
APP	chr3	29364939	29365153	215	29364978	9	8.00723	5.65536	3.78597	Intron	L1Md_T|LINE|L1		Egfem1	NM_001167748;NM_029412
APP	chr3	29810810	29811074	265	29810915	12	9.45707	6.03991	5.0882	Intron	L1Md_A|LINE|L1		Mannr	NR_110437
APP	chr3	29811170	29811406	237	29811303	12	11.0848	7.04586	6.61119	Intron	L1Md_A|LINE|L1		Mannr	NR_110437
APP	chr3	29889238	29889611	374	29889377	11	5.24649	3.63119	1.72439	Intron	(CA)n|Simple_repeat|Simple_repeat		Mecom	NM_007963
APP	chr3	29927348	29927547	200	29927427	13	10.5442	6.50452	6.0968	Intergenic	L1Md_T|LINE|L1		Mecom	NM_007963
APP	chr3	31231032	31231231	200	31231051	6	5.0922	4.1425	1.60528	Intergenic	Intergenic		Slc7a14	NM_172861
APP	chr3	31980128	31980386	259	31980272	11	7.05525	4.73099	3.02535	Intron	L1Md_F2|LINE|L1		Kcnmb2	NM_028231
APP	chr3	32065335	32065595	261	32065507	13	9.52851	5.8754	5.15322	Intron	L1Md_A|LINE|L1		Kcnmb2	NM_028231
APP	chr3	32141207	32141406	200	32141403	8	5.45343	4.18148	1.87107	Intergenic	L1Md_A|LINE|L1		Zmat3;Kcnmb2	NM_009517;NM_028231
APP	chr3	33669153	33669363	211	33669285	12	11.5921	7.35197	7.09652	Intergenic	L1Md_T|LINE|L1		Ttc14;Ccdc39	NM_027619;NM_026222;NM_001290500;NM_025978;NM_001290502
APP	chr3	36133086	36133434	349	36133377	7	5.81683	4.52429	2.11363	Intergenic	L1Md_F2|LINE|L1		D3Ertd254e;Qrfpr	NM_198192;NM_001101478
APP	chr3	38927973	38928172	200	38927988	7	5.24211	4.16259	1.72298	Intergenic	L1Md_F2|LINE|L1		Fat4	NM_183221
APP	chr3	39722428	39722654	227	39722513	12	7.9867	5.12524	3.78597	Intergenic	L1Md_F|LINE|L1
APP	chr3	42992085	42992284	200	42992167	8	4.47711	3.54824	1.32716	Intergenic	L1Md_T|LINE|L1
APP	chr3	45153789	45154026	238	45153838	8	4.47711	3.54824	1.32716	Intron	L1Md_T|LINE|L1		2610316D01Rik	NR_045172
APP	chr3	45384863	45385101	239	45384981	8	6.88952	5.08983	2.88239	Intergenic	Intergenic
APP	chr3	46542213	46542412	200	46542380	6	4.7943	3.95876	1.46767	Intergenic	L1Md_T|LINE|L1
APP	chr3	47088446	47088689	244	47088522	9	7.62344	5.41989	3.46838	Intergenic	L1Md_A|LINE|L1
APP	chr3	49624807	49625010	204	49624975	10	9.63869	6.50345	5.25524	Intergenic	L1Md_T|LINE|L1		Pcdh18	NM_130448
APP	chr3	49625350	49625549	200	49625476	5	4.08013	3.55072	0.98786	Intergenic	L1Md_T|LINE|L1		Pcdh18	NM_130448
APP	chr3	49628445	49628676	232	49628575	12	5.28664	3.52417	1.75791	Intergenic	L1Md_A|LINE|L1		Pcdh18	NM_130448
APP	chr3	50505171	50505370	200	50505246	8	6.88952	5.08983	2.88239	Intergenic	L1Md_A|LINE|L1
APP	chr3	53523570	53523769	200	53523630	6	5.0922	4.1425	1.60528	Intergenic	L1Md_T|LINE|L1		Frem2	NM_172862
APP	chr3	55779712	55779911	200	55779800	9	7.27567	5.20324	3.17509	Intron	L1Md_F3|LINE|L1		Nbea	NM_030595
APP	chr3	57130181	57130509	329	57130263	8	7.28	5.32607	3.17509	Intergenic	L1Md_A|LINE|L1		Tm4sf1;Tm4sf4	NM_145539;NM_008536
APP	chr3	57505773	57506046	274	57505857	13	11.8079	7.28454	7.30434	Intergenic	L1Md_F2|LINE|L1		Commd2;Ankub1;Rnf13	NM_175095;NM_001113413;NM_011883;NM_001033349
APP	chr3	57815954	57816203	250	57816076	9	7.62344	5.41989	3.46838	Intergenic	L1Md_T|LINE|L1
APP	chr3	59464156	59464412	257	59464300	9	5.29738	3.94249	1.75791	Intergenic	L1Md_T|LINE|L1		Gm5538	NM_001101531
APP	chr3	59490064	59490287	224	59490103	7	6.16097	4.73429	2.31281	Intergenic	L1Md_A|LINE|L1		Gm5538	NM_001101531
APP	chr3	59621101	59621300	200	59621264	8	6.88952	5.08983	2.88239	Intergenic	GA-rich|Low_complexity|Low_complexity		Gm5538;Gm8298	NM_001101531;NM_001243003
APP	chr3	59848975	59849324	350	59849151	64	14.5308	3.04333	9.94958	Intergenic	(CACAG)n|Simple_repeat|Simple_repeat		Gm9696;Aadac;Sucnr1;Aadacl2	NR_037189;NM_023383;NM_001128091;NM_032400
APP	chr3	62319875	62320085	211	62319942	10	8.35562	5.72357	4.11055	Intergenic	L1Md_F2|LINE|L1		Gpr149;Dhx36;Arhgef26	NM_001081295;NM_177346;NM_028136
APP	chr3	64381312	64381511	200	64381371	10	6.15787	4.33674	2.31281	Intergenic	L1Md_T|LINE|L1		Vmn2r6;Vmn2r5;Vmn2r-ps11	NM_001104619;NM_001104618;NR_003962
APP	chr3	64439835	64440101	267	64440019	8	7.27152	5.32101	3.17509	Intron	L1Md_Gf|LINE|L1		Vmn2r-ps11	NR_003962
APP	chr3	64619643	64619874	232	64619726	8	6.88952	5.08983	2.88239	Intron	L1Md_A|LINE|L1		Vmn2r-ps11	NR_003962
APP	chr3	65877183	65877394	212	65877328	10	7.38071	5.1107	3.24811	Intron	L1Md_A|LINE|L1		Veph1	NM_145820
APP	chr3	66476638	66476877	240	66476724	9	6.3968	4.64609	2.49375	Intergenic	L1Md_T|LINE|L1
APP	chr3	66641546	66641754	209	66641653	6	5.0922	4.1425	1.60528	Intergenic	L1Md_T|LINE|L1
APP	chr3	66719628	66719887	260	66719722	8	7.28	5.32607	3.17509	Intergenic	L1Md_T|LINE|L1		Rsrc1;Shox2	NM_025822;NM_013665
APP	chr3	67555673	67555872	200	67555737	11	8.096	5.38316	3.86852	Intergenic	L1Md_T|LINE|L1
APP	chr3	71176595	71176953	359	71176763	8	7.28	5.32607	3.17509	Intergenic	L1Md_T|LINE|L1
APP	chr3	71177903	71178137	235	71177987	7	6.16097	4.73429	2.31281	Intergenic	L1Md_T|LINE|L1
APP	chr3	71198970	71199178	209	71198994	8	6.54678	4.8779	2.62118	Intergenic	L1Md_A|LINE|L1
APP	chr3	72698915	72699332	418	72699100	10	9.64919	6.50965	5.25569	Intron	L1Md_T|LINE|L1		Sis	NM_001081137
APP	chr3	72827357	72827556	200	72827399	10	7.38071	5.1107	3.24811	Intergenic	L1Md_A|LINE|L1		Sis;Slitrk3;Gm20754	NM_198864;NR_040557;NM_001081137
APP	chr3	74754896	74755105	210	74755074	8	6.23645	4.68292	2.37084	Intergenic	L1Md_F2|LINE|L1		Zbbx	NM_172515
APP	chr3	75896019	75896218	200	75896194	7	6.16097	4.73429	2.31281	Intron	L1Md_A|LINE|L1		Fstl5	NM_178673;NM_001253719
APP	chr3	80271375	80271577	203	80271479	12	7.9867	5.12524	3.78597	Intergenic	L1Md_T|LINE|L1
APP	chr3	83144958	83145162	205	83145078	13	10.5442	6.50452	6.0968	Intergenic	L1Md_A|LINE|L1
APP	chr3	83214606	83214848	243	83214720	9	8.44414	5.91786	4.15533	Intergenic	L1Md_F3|LINE|L1
APP	chr3	86630076	86630424	349	86630358	7	5.81683	4.52429	2.11363	Intron	intron (NM_001195497, intron 4 of 15)		Dclk2	NM_001195500;NM_027539;NM_001195497;NM_001195496;NM_001195499;NM_001195498
APP	chr3	87121247	87121446	200	87121292	9	6.95815	5.00325	2.94082	Intergenic	L1Md_F2|LINE|L1		Fcrl1;Fcrls;Cd5l	NM_030707;NM_009690;NM_153090;NM_001136236;NM_178165
APP	chr3	87229055	87229264	210	87229086	71	10.7461	2.38467	6.29019	Intergenic	MTEa|LTR|MaLR		Fcrl1;Fcrl5;Cd5l	NM_001113238;NM_183222;NM_001136236;NM_178165;NM_153090;NM_009690
APP	chr3	90972095	90972294	200	90972170	6	5.0922	4.1425	1.60528	Intergenic	L1Md_F3|LINE|L1		4930529C04Rik;9130204L05Rik	NM_001101461;NR_033593
APP	chr3	93554442	93554916	475	93554610	11	8.40176	5.5753	4.14211	Intergenic	L1Md_F|LINE|L1		Tdpoz3;Tdpoz2;Tdpoz1;Tdpoz4	NM_148949;NM_207271;NM_001007222;NM_207272
APP	chr3	93954851	93955161	311	93955017	11	7.05525	4.73099	3.02535	Intergenic	L1Md_T|LINE|L1		Gm10696;Tdpoz5;Gm9125	NM_207273;NM_001146107;NM_001163730
APP	chr3	95848656	95848983	328	95848745	72	9.49624	2.22008	5.12269	Intron	intron (NM_013841, intron 7 of 14)		Vps45	NM_013841
APP	chr3	96645849	96646201	353	96646025	13	8.94978	5.51949	4.62623	Intron	(TG)n|Simple_repeat|Simple_repeat		Pdzk1	NM_001146001;NM_021517
APP	chr3	96648643	96648999	357	96648905	16	8.34669	4.60853	4.10707	Intron	(TG)n|Simple_repeat|Simple_repeat		Pdzk1	NM_001146001;NM_021517
APP	chr3	97740787	97740986	200	97740871	7	6.16097	4.73429	2.31281	Intron	(CA)n|Simple_repeat|Simple_repeat		Gm5544	NM_001033779
APP	chr3	98284077	98284276	200	98284212	6	5.0922	4.1425	1.60528	Intergenic	L1Md_T|LINE|L1		Zfp697;Hsd3b4;Gm10681	NM_001111336;NM_172863;NM_001270429;NM_008294
APP	chr3	100354824	100355023	200	100354963	12	6.88037	4.45117	2.88239	Intergenic	(CACCT)n|Simple_repeat|Simple_repeat		Man1a2;Fam46c	NM_010763;NM_001142952
APP	chr3	102238437	102238655	219	102238569	9	8.00723	5.65536	3.78597	Intergenic	L1Md_T|LINE|L1		Ngf	NM_013609;NM_001112698
APP	chr3	102342417	102342632	216	102342575	12	11.5921	7.35197	7.09652	Intergenic	Lx9|LINE|L1		Ngf	NM_013609;NM_001112698
APP	chr3	102692254	102692505	252	102692400	9	6.3968	4.64609	2.49375	Intron	L1Md_T|LINE|L1		Sycp1	NM_011516
APP	chr3	102789873	102790080	208	102790007	8	7.28	5.32607	3.17509	Intergenic	L1Md_T|LINE|L1		Csde1;Sike1;Ampd1;Nras;Nr1h5;Sycp1	NM_198658;NM_001033303;NM_025679;NM_144901;NM_001161854;NM_011516;NM_201619;NM_010937;NM_201622
APP	chr3	104000720	104000919	200	104000846	6	5.0922	4.1425	1.60528	Intron	L1Md_A|LINE|L1		Magi3	NM_001159354;NM_133853
APP	chr3	104001387	104001586	200	104001449	6	5.0922	4.1425	1.60528	Intron	L1Md_A|LINE|L1		Magi3	NM_001159354;NM_133853
APP	chr3	106727284	106727495	212	106727467	10	8.74089	5.96188	4.42832	Intergenic	L1Md_T|LINE|L1
APP	chr3	109795035	109795325	291	109795090	14	9.94237	5.91374	5.53008	Intron	L1Md_F2|LINE|L1		Ntng1	NM_133488;NM_001163348;NM_001163349;NM_030699;NM_001163351;NM_001163350
APP	chr3	111063472	111063671	200	111063582	10	7.38071	5.1107	3.24811	Intergenic	L1Md_A|LINE|L1
APP	chr3	111568977	111569202	226	111569104	11	8.40176	5.5753	4.14211	Intergenic	L1Md_T|LINE|L1
APP	chr3	111993228	111993431	204	111993390	11	7.05525	4.73099	3.02535	Intergenic	L1Md_T|LINE|L1
APP	chr3	113044495	113044739	245	113044584	8	7.28	5.32607	3.17509	Intergenic	(GAAA)n|Simple_repeat|Simple_repeat		Amy2a4;Amy2a5;Amy2a2;Amy2a3;Amy2b	NM_001190404;NM_001042711;NM_001190403;NM_001160150;NM_001160151;NM_001160152
APP	chr3	113100733	113100932	200	113100860	7	6.15349	4.72978	2.31281	Intergenic	L1Md_T|LINE|L1		Amy2a4;Amy2a5;Amy2a2;Amy2a3	NM_001160150;NM_001160151;NM_001160152;NM_001042711
APP	chr3	113103180	113103412	233	113103270	8	6.88952	5.08983	2.88239	Intergenic	L1Md_T|LINE|L1		Amy2a4;Amy2a5;Amy2a2;Amy2a3	NM_001160150;NM_001160151;NM_001160152;NM_001042711
APP	chr3	113167971	113168170	200	113168047	7	5.81683	4.52429	2.11363	Intergenic	L1Md_T|LINE|L1		Amy1;Amy2a4;Amy2a5;Amy2a2;Amy2a3	NM_007446;NM_001160150;NM_001160151;NM_001160152;NM_001110505;NM_001042711
APP	chr3	114421894	114422093	200	114421995	7	6.16097	4.73429	2.31281	Intergenic	L1Md_T|LINE|L1
APP	chr3	118278813	118279026	214	118278862	7	5.81683	4.52429	2.11363	Intron	L1Md_A|LINE|L1		Dpyd	NM_170778
APP	chr3	118656921	118657202	282	118657060	7	5.81683	4.52429	2.11363	Intron	L1Md_F2|LINE|L1		Dpyd	NM_170778
APP	chr3	119059168	119059476	309	119059291	13	10.5442	6.50452	6.0968	Intron	L1Md_T|LINE|L1		Dpyd	NM_170778
APP	chr3	119086624	119086868	245	119086727	14	8.64403	5.13596	4.34319	Intron	(TG)n|Simple_repeat|Simple_repeat		Dpyd	NM_170778
APP	chr3	119574603	119574802	200	119574672	7	6.16097	4.73429	2.31281	Intergenic	Intergenic		Ptbp2	NM_019550
APP	chr3	119685078	119685296	219	119685173	8	6.88952	5.08983	2.88239	Intergenic	L1Md_T|LINE|L1
APP	chr3	121584941	121585187	247	121585175	7	5.81683	4.52429	2.11363	Intergenic	(TGG)n|Simple_repeat|Simple_repeat		Abcd3;Arhgap29	NM_008991;NM_172525
APP	chr3	122216904	122217173	270	122217028	7	5.81683	4.52429	2.11363	Intron	(CA)n|Simple_repeat|Simple_repeat		Bcar3	NM_013867
APP	chr3	122596154	122596353	200	122596302	9	8.00723	5.65536	3.78597	Promoter	(CA)n|Simple_repeat|Simple_repeat		Fabp2	NM_007980
APP	chr3	125768008	125768394	387	125768195	10	9.64919	6.50965	5.25569	Intergenic	L1Md_A|LINE|L1
APP	chr3	125984491	125984690	200	125984571	6	5.0922	4.1425	1.60528	Intergenic	L1Md_F2|LINE|L1		Arsj	NM_173451
APP	chr3	131539665	131540039	375	131539860	7	6.16097	4.73429	2.31281	Intergenic	L1Md_F3|LINE|L1
APP	chr3	134824511	134824713	203	134824625	8	7.28	5.32607	3.17509	Intergenic	L1Md_A|LINE|L1		Cenpe	NM_173762
APP	chr3	138060377	138060585	209	138060483	10	7.38071	5.1107	3.24811	Intergenic	Lx|LINE|L1		Metap1;Adh4;Adh5;Adh6-ps1;Adh6a	NR_033581;NM_011996;NM_026945;NM_175224;NM_001288578;NM_007410
APP	chr3	138845968	138846255	288	138846145	8	7.28	5.32607	3.17509	Intergenic	L1Md_F2|LINE|L1		Stpg2	NM_198659
APP	chr3	139483301	139483534	234	139483385	9	7.27567	5.20324	3.17509	Intergenic	L1Md_A|LINE|L1
APP	chr3	141667452	141667770	319	141667572	11	10.8917	7.10143	6.42636	Intron	L1Md_A|LINE|L1		Bmpr1b	NM_001277216;NM_001277217
APP	chr3	143508147	143508412	266	143508335	8	4.47711	3.54824	1.32716	Intergenic	L1Md_T|LINE|L1
APP	chr3	143519075	143519274	200	143519220	10	8.35562	5.72357	4.11055	Intergenic	L1Md_F2|LINE|L1
APP	chr3	144319039	144319381	343	144319205	10	6.15787	4.33674	2.31281	Intergenic	L1Md_T|LINE|L1		Hs2st1;Clca1;Sh3glb1;Sep15	NM_019464;NM_001282042;NM_053102;NM_001282037;NM_009899;NM_011828
APP	chr3	146139993	146140380	388	146140212	16	7.67259	4.25414	3.51547	Intron	intron (NM_027617, intron 8 of 14)		Spata1	NM_027617
APP	chr3	146140459	146140891	433	146140501	18	8.26952	4.26291	4.03405	Intron	intron (NM_027617, intron 8 of 14)		Spata1	NM_027617
APP	chr3	148749219	148749418	200	148749389	7	6.16097	4.73429	2.31281	Intergenic	Intergenic
APP	chr3	150389197	150389396	200	150389347	8	7.28	5.32607	3.17509	Intergenic	L1Md_A|LINE|L1
APP	chr3	152252463	152252667	205	152252528	15	9.56811	5.47836	5.19029	Intron	intron (NM_001081277, intron 6 of 13)		Ak5	NM_001081277
APP	chr3	156105894	156106130	237	156106003	8	5.95334	4.50292	2.23333	Intergenic	L1Md_A|LINE|L1
APP	chr3	157336094	157336376	283	157336212	11	9.89567	6.50387	5.48726	Intergenic	L1Md_A|LINE|L1		Ptger3	NM_011196
APP	chr3	157763530	157763734	205	157763545	9	8.00723	5.65536	3.78597	Intron	L1Md_T|LINE|L1		Lrrc7	NM_001291452;NM_001291453;NM_001081358
APP	chr3	159049765	159050004	240	159049935	12	10.6244	6.76421	6.17349	Intergenic	L1Md_T|LINE|L1		Gm20752	NR_040750
APP	chr4	4860999	4861292	294	4861153	6	5.0922	4.1425	1.60528	Intergenic	L1Md_A|LINE|L1
APP	chr4	4932035	4932363	329	4932199	10	6.15787	4.33674	2.31281	Intergenic	L1Md_A|LINE|L1
APP	chr4	4993312	4993511	200	4993476	10	6.15787	4.33674	2.31281	Intergenic	L1Md_F3|LINE|L1
APP	chr4	4993612	4993811	200	4993672	6	4.7943	3.95876	1.46767	Intergenic	L1Md_F3|LINE|L1
APP	chr4	5341514	5341786	273	5341689	10	8.35562	5.72357	4.11055	Intergenic	L1Md_F|LINE|L1
APP	chr4	5639037	5639236	200	5639093	8	6.54678	4.8779	2.62118	Intron	L1Md_T|LINE|L1		Fam110b	NM_173426
APP	chr4	6579748	6579947	200	6579887	7	6.11804	4.7084	2.31281	Intergenic	L1Md_A|LINE|L1		Tox	NM_145711
APP	chr4	7280655	7280921	267	7280756	13	7.74751	4.79357	3.58134	Intergenic	L1Md_T|LINE|L1
APP	chr4	7813174	7813602	429	7813331	14	11.6609	6.96913	7.16209	Intergenic	L1Md_T|LINE|L1
APP	chr4	9648701	9648920	220	9648850	10	7.38071	5.1107	3.24811	Intergenic	L1Md_T|LINE|L1		Asph;4930412C18Rik	NM_023066;NM_001290367;NR_030693;NM_001177855;NM_001177854;NM_001177856;NM_001177851;NM_001177850;NM_001177853;NM_001177852;NM_133723;NM_001177849
APP	chr4	10421077	10421336	260	10421262	9	6.3968	4.64609	2.49375	Intergenic	L1Md_T|LINE|L1		1700123O12Rik	NR_045185
APP	chr4	10605079	10605294	216	10605210	8	6.88952	5.08983	2.88239	Intron	L1Md_A|LINE|L1		1700123O12Rik	NR_045185
APP	chr4	11324430	11324630	201	11324496	10	9.64919	6.50965	5.25569	Intergenic	(CA)n|Simple_repeat|Simple_repeat		Esrp1;Dpy19l4;1110037F02Rik	NM_001290383;NM_194055;NM_001081201;NM_001081183
APP	chr4	12141764	12142091	328	12142006	8	6.88952	5.08983	2.88239	Intergenic	L1Md_A|LINE|L1		Fam92a;Rbm12b1	NM_026558;NM_028226
APP	chr4	12328363	12328588	226	12328483	9	8.44414	5.91786	4.15533	Intergenic	L1Md_F|LINE|L1
APP	chr4	13973902	13974101	200	13974018	9	5.29738	3.94249	1.75791	Intergenic	L1Md_A|LINE|L1
APP	chr4	14352511	14352727	217	14352667	9	6.66638	4.81806	2.73012	Intergenic	L1Md_T|LINE|L1		Slc26a7	NM_145947
APP	chr4	14922030	14922229	200	14922117	7	6.16097	4.73429	2.31281	Intron	Lx6|LINE|L1		Necab1	NM_178617
APP	chr4	14946817	14947030	214	14946935	8	6.88952	5.08983	2.88239	Intron	L1Md_A|LINE|L1		Necab1	NM_178617
APP	chr4	15790904	15791103	200	15790988	10	7.38071	5.1107	3.24811	Intergenic	L1Md_A|LINE|L1		Mir6400;Decr1;Nbn;Calb1	NM_026172;NM_009788;NR_105826;NM_013752
APP	chr4	15792237	15792453	217	15792322	9	8.44414	5.91786	4.15533	Intergenic	L1Md_A|LINE|L1		Mir6400;Decr1;Nbn;Calb1	NM_026172;NM_009788;NR_105826;NM_013752
APP	chr4	16712050	16712480	431	16712137	12	11.5921	7.35197	7.09652	Intergenic	L1Md_T|LINE|L1
APP	chr4	16714282	16714579	298	16714451	8	7.28	5.32607	3.17509	Intergenic	L1Md_T|LINE|L1
APP	chr4	16993829	16994130	302	16994017	9	6.66638	4.81806	2.73012	Intergenic	L1Md_F2|LINE|L1
APP	chr4	17146299	17146498	200	17146382	10	8.74089	5.96188	4.42832	Intergenic	L1Md_T|LINE|L1
APP	chr4	17502290	17502489	200	17502321	7	6.16097	4.73429	2.31281	Intergenic	L1Md_T|LINE|L1
APP	chr4	18353679	18353901	223	18353853	11	10.3617	6.78644	5.92478	Intergenic	L1Md_T|LINE|L1
APP	chr4	18639099	18639300	202	18639154	9	6.3968	4.64609	2.49375	Intergenic	L1Md_T|LINE|L1
APP	chr4	19118331	19118605	275	19118417	10	5.24289	3.76637	1.72298	Intergenic	L1Md_T|LINE|L1		Cngb3	NM_013927
APP	chr4	19185973	19186172	200	19186119	7	6.16097	4.73429	2.31281	Intergenic	L1_Rod|LINE|L1		Cngb3	NM_013927
APP	chr4	20056136	20056399	264	20056301	11	8.40176	5.5753	4.14211	Intron	L1Md_F2|LINE|L1		Nkain3	NM_001290410
APP	chr4	21241013	21241248	236	21241181	11	5.24649	3.63119	1.72439	Intergenic	L1Md_T|LINE|L1
APP	chr4	21434348	21434620	273	21434542	10	7.67996	5.29986	3.51865	Intergenic	L1Md_A|LINE|L1
APP	chr4	22391454	22391811	358	22391638	8	7.28	5.32607	3.17509	Intergenic	L1Md_A|LINE|L1		Pou3f2;Fbxl4	NR_104379;NR_104378;NM_172988;NR_104380;NM_008899
APP	chr4	25113904	25114275	372	25114095	13	10.5442	6.50452	6.0968	Intergenic	L1Md_T|LINE|L1		Ufl1;Fhl5	NM_021318;NM_026194
APP	chr4	26067498	26067872	375	26067582	8	7.28	5.32607	3.17509	Intergenic	L1Md_A|LINE|L1
APP	chr4	26494908	26495164	257	26495069	10	9.64919	6.50965	5.25569	Intergenic	L1Md_A|LINE|L1		4930548K13Rik	NR_040656
APP	chr4	26997022	26997316	295	26997117	10	8.74089	5.96188	4.42832	Intergenic	L1Md_F2|LINE|L1
APP	chr4	29175183	29175382	200	29175276	8	5.45343	4.18148	1.87107	Intergenic	L1Md_A|LINE|L1
APP	chr4	30278393	30278646	254	30278520	10	7.38071	5.1107	3.24811	Intergenic	L1Md_A|LINE|L1
APP	chr4	34991489	34991688	200	34991581	9	5.29738	3.94249	1.75791	Intron	L1Md_T|LINE|L1		Mob3b	NM_178061
APP	chr4	37293644	37293917	274	37293761	7	5.51507	4.33591	1.90641	Intergenic	L1Md_T|LINE|L1
APP	chr4	37651435	37651637	203	37651453	8	6.54678	4.8779	2.62118	Intergenic	L1Md_F3|LINE|L1
APP	chr4	38119580	38119907	328	38119630	9	5.29738	3.94249	1.75791	Intergenic	(TTTC)n|Simple_repeat|Simple_repeat
APP	chr4	38350719	38350980	262	38350908	13	6.00973	3.79526	2.28483	Intergenic	L1Md_A|LINE|L1
APP	chr4	39214174	39214641	468	39214289	10	9.64919	6.50965	5.25569	Intergenic	L1Md_T|LINE|L1
APP	chr4	39214983	39215338	356	39215221	8	6.88952	5.08983	2.88239	Intergenic	L1Md_T|LINE|L1
APP	chr4	39703930	39704129	200	39703990	8	5.45343	4.18148	1.87107	Intergenic	L1Md_A|LINE|L1
APP	chr4	44369794	44370094	301	44369922	8	6.88952	5.08983	2.88239	Intron	L1Md_A|LINE|L1		Melk	NM_010790
APP	chr4	47112601	47112852	252	47112662	10	7.38071	5.1107	3.24811	Intron	RLTR10|LTR|ERVK		Galnt12	NM_172693
APP	chr4	48864179	48864432	254	48864281	11	7.05526	4.73099	3.02535	Intergenic	L1Md_A|LINE|L1
APP	chr4	50542685	50542941	257	50542776	13	8.94978	5.51949	4.62623	Intergenic	L1Md_Gf|LINE|L1
APP	chr4	52078135	52078334	200	52078315	9	7.27567	5.20324	3.17509	Intergenic	L1Md_T|LINE|L1		C630028M04Rik	NR_040668
APP	chr4	52422758	52422957	200	52422900	8	6.88952	5.08983	2.88239	Intergenic	L1Md_T|LINE|L1		Smc2os;Smc2	NM_008017;NR_045175
APP	chr4	52692409	52692608	200	52692570	7	5.81683	4.52429	2.11363	Intergenic	L1Md_T|LINE|L1		Toporsl	NM_026652
APP	chr4	52782512	52782811	300	52782645	10	9.64919	6.50965	5.25569	Intergenic	(GAA)n|Simple_repeat|Simple_repeat		Olfr275;Olfr273;4930552N02Rik	NM_146824;NM_146858;NR_040661
APP	chr4	53403980	53404391	412	53404155	9	6.3968	4.64609	2.49375	Intergenic	L1Md_T|LINE|L1		Slc44a1	NM_133891;NM_001159633
APP	chr4	54232849	54233130	282	54232954	8	6.88952	5.08983	2.88239	Intergenic	L1Md_A|LINE|L1
APP	chr4	54687501	54687813	313	54687666	11	8.40176	5.5753	4.14211	Intergenic	L1Md_T|LINE|L1
APP	chr4	55811584	55811783	200	55811681	6	5.0922	4.1425	1.60528	Intergenic	(TTCC)n|Simple_repeat|Simple_repeat
APP	chr4	56409285	56409507	223	56409457	7	5.51507	4.33591	1.90641	Intergenic	L1Md_F|LINE|L1
APP	chr4	56584670	56584935	266	56584780	11	8.40176	5.5753	4.14211	Intergenic	L1Md_A|LINE|L1
APP	chr4	60375927	60376321	395	60376204	16	7.51686	4.1739	3.37901	Intergenic	Intergenic		Mup9	NM_001281979
APP	chr4	60469298	60469630	333	60469385	10	9.64919	6.50965	5.25569	Intergenic	L1Md_T|LINE|L1		Mup1;Mup9	NM_001163010;NM_001163011;NM_031188;NM_001281979
APP	chr4	60509642	60509883	242	60509769	11	6.0447	4.10877	2.31281	Intergenic	L1_Mus4|LINE|L1		Gm2083;Mup1;Mup10;Mup9	NM_001134644;NM_001122647;NM_001163010;NM_001163011;NM_031188;NM_001281979
APP	chr4	61085367	61085592	226	61085477	11	10.3617	6.78644	5.92478	Intron	L1Md_F|LINE|L1		Mup2	NM_001286096;NM_001045550
APP	chr4	61293344	61293618	275	61293535	17	8.28911	4.41942	4.05204	Intergenic	Intergenic		Mup17;LOC100048884	NM_001199333;NM_001200006
APP	chr4	61365709	61365911	203	61365757	10	7.67996	5.29986	3.51865	Intergenic	L1_Mus4|LINE|L1		LOC100048884;Mup19	NM_001135127;NM_001199333
APP	chr4	61751729	61751960	232	61751777	10	7.38071	5.1107	3.24811	Promoter	L1_Mm|LINE|L1		Mup3	NM_001039544
APP	chr4	61752452	61752651	200	61752525	8	7.28	5.32607	3.17509	Promoter	L1_Mm|LINE|L1		Mup3	NM_001039544
APP	chr4	63312101	63312300	200	63312232	7	6.16097	4.73429	2.31281	Intergenic	L1Md_T|LINE|L1		Gm11213;Tnfsf15;1700018C11Rik;6330416G13Rik	NM_144905;NR_028583;NM_029324;NR_028584;NM_177371
APP	chr4	63312404	63312638	235	63312477	7	6.16097	4.73429	2.31281	Intergenic	L1Md_T|LINE|L1		Gm11213;Tnfsf15;1700018C11Rik;6330416G13Rik	NM_144905;NR_028583;NM_029324;NR_028584;NM_177371
APP	chr4	64024263	64024462	200	64024297	8	7.27152	5.32101	3.17509	Intergenic	L1Md_A|LINE|L1
APP	chr4	67704305	67704504	200	67704375	6	5.0922	4.1425	1.60528	Intergenic	L1Md_A|LINE|L1
APP	chr4	67969315	67969538	224	67969388	7	6.16097	4.73429	2.31281	Intergenic	L1Md_F2|LINE|L1
APP	chr4	68374742	68375026	285	68374909	9	8.44414	5.91786	4.15533	Intergenic	L1Md_F3|LINE|L1		Brinp1	NM_019967
APP	chr4	68898946	68899145	200	68899038	10	9.1658	6.2209	4.81433	Intergenic	L1Md_F2|LINE|L1
APP	chr4	69213203	69213429	227	69213272	7	6.16097	4.73429	2.31281	Intergenic	(GAAA)n|Simple_repeat|Simple_repeat
APP	chr4	71078704	71078903	200	71078820	8	5.45343	4.18148	1.87107	Intergenic	HAL1-3A_ME|LINE|L1
APP	chr4	71517745	71517944	200	71517851	10	7.38071	5.1107	3.24811	Intergenic	L1Md_A|LINE|L1
APP	chr4	71750662	71750876	215	71750749	8	7.27152	5.32101	3.17509	Intergenic	L1Md_F2|LINE|L1		Tle1	NM_001285532;NM_011599;NM_001285531;NM_001285529;NM_001285530
APP	chr4	72065942	72066223	282	72066026	12	9.45707	6.03991	5.0882	Intergenic	L1Md_T|LINE|L1
APP	chr4	72343373	72343758	386	72343431	8	7.27152	5.32101	3.17509	Intergenic	L1Md_T|LINE|L1
APP	chr4	72898090	72898309	220	72898175	9	8.00723	5.65536	3.78597	Intergenic	L1Md_T|LINE|L1
APP	chr4	72963569	72963773	205	72963624	8	6.88952	5.08983	2.88239	Intergenic	Intergenic		Gm11487	NM_001013393
APP	chr4	73398255	73398479	225	73398356	12	11.5921	7.35197	7.09652	Intron	L1Md_T|LINE|L1		Rasef	NM_001017427
APP	chr4	74136631	74136839	209	74136685	10	7.67996	5.29986	3.51865	Intergenic	L1Md_F2|LINE|L1		Kdm4c	NM_144787;NM_001172095
APP	chr4	74745901	74746100	200	74745928	9	4.47771	3.42398	1.32716	Intergenic	L1Md_T|LINE|L1
APP	chr4	74782956	74783155	200	74783038	8	6.96252	5.13444	2.94488	Intergenic	L1Md_T|LINE|L1
APP	chr4	74999584	74999790	207	74999659	9	6.3968	4.64609	2.49375	Intergenic	L1Md_A|LINE|L1		Tmem261	NM_025849
APP	chr4	75354718	75354956	239	75354861	7	6.16097	4.73429	2.31281	Intergenic	L1Md_F2|LINE|L1
APP	chr4	75858071	75858393	323	75858238	8	7.28	5.32607	3.17509	Intron	L1Md_A|LINE|L1		Ptprd	NM_011211
APP	chr4	78016665	78016864	200	78016843	6	5.0922	4.1425	1.60528	Intergenic	Lx3C|LINE|L1
APP	chr4	78505115	78505370	256	78505182	8	7.28	5.32607	3.17509	Intergenic	L1Md_F2|LINE|L1
APP	chr4	79275131	79275330	200	79275244	7	6.15349	4.72978	2.31281	Intergenic	L1Md_A|LINE|L1
APP	chr4	79649820	79650023	204	79649844	76	9.65486	2.18835	5.26085	Intergenic	Intergenic
APP	chr4	79910580	79910787	208	79910701	9	7.27567	5.20324	3.17509	Intergenic	L1Md_A|LINE|L1
APP	chr4	80460564	80460763	200	80460727	9	8.00723	5.65536	3.78597	Intergenic	L1Md_T|LINE|L1		Tyrp1;Lurap1l	NM_026821;NM_001282014;NM_001282015;NM_031202
APP	chr4	81350106	81350305	200	81350267	10	5.24289	3.76637	1.72298	Intergenic	L1Md_A|LINE|L1
APP	chr4	81838497	81838733	237	81838586	8	7.28	5.32607	3.17509	Intergenic	L1Md_T|LINE|L1		Nfib;Gm5860	NM_001113209;NM_001113210;NM_008687;NM_001286131;NR_040659;NM_001286127
APP	chr4	81857972	81858195	224	81858141	11	7.05525	4.73099	3.02535	Intergenic	L1Md_F2|LINE|L1		Nfib	NM_008687;NM_001286131;NM_001113209;NM_001113210;NM_001286127
APP	chr4	82419657	82419886	230	82419837	12	11.5921	7.35197	7.09652	Intergenic	L1Md_A|LINE|L1		Zdhhc21	NM_026647
APP	chr4	83392951	83393154	204	83393070	8	7.28	5.32607	3.17509	Intron	L1Md_A|LINE|L1		Ccdc171	NM_001081012
APP	chr4	83394696	83394931	236	83394844	8	5.45343	4.18148	1.87107	Intron	L1Md_A|LINE|L1		Ccdc171	NM_001081012
APP	chr4	86289805	86290022	218	86289921	8	7.27152	5.32101	3.17509	Intergenic	L1Md_F2|LINE|L1		Fam154a;Haus6;Plin2;Rraga;Scarna8	NR_028545;NM_173400;NM_178376;NM_001081096;NM_007408
APP	chr4	86962494	86962700	207	86962683	8	6.88952	5.08983	2.88239	Intergenic	L1Md_A|LINE|L1		Slc24a2	NM_172426;NM_001110240
APP	chr4	87322793	87323030	238	87322971	9	8.44414	5.91786	4.15533	Intergenic	L1Md_T|LINE|L1		Mllt3	NM_029931;NM_001286158;NM_027326
APP	chr4	87323107	87323306	200	87323115	7	5.81683	4.52429	2.11363	Intergenic	L1Md_T|LINE|L1		Mllt3	NM_029931;NM_001286158;NM_027326
APP	chr4	87324814	87325063	250	87325001	15	10.9626	6.30799	6.49413	Intergenic	L1Md_T|LINE|L1		Mllt3	NM_029931;NM_001286158;NM_027326
APP	chr4	87931587	87931812	226	87931738	11	7.05525	4.73099	3.02535	Intron	L1Md_T|LINE|L1		Focad	NM_001081184
APP	chr4	89265324	89265523	200	89265493	8	6.88952	5.08983	2.88239	Intergenic	L1Md_F|LINE|L1		Dmrta1	NM_175647
APP	chr4	91306219	91306521	303	91306343	11	6.0447	4.10877	2.31281	Intergenic	L1Md_T|LINE|L1
APP	chr4	91323644	91323892	249	91323755	11	7.81062	5.20383	3.64028	Intergenic	L1Md_T|LINE|L1
APP	chr4	92375543	92375933	391	92375769	11	8.40176	5.5753	4.14211	Intergenic	L1Md_T|LINE|L1
APP	chr4	92518526	92518725	200	92518663	9	8.00723	5.65536	3.78597	Intergenic	L1Md_F|LINE|L1
APP	chr4	92653964	92654252	289	92654114	9	8.44414	5.91786	4.15533	Intergenic	L1Md_T|LINE|L1
APP	chr4	93157031	93157317	287	93157185	10	9.64919	6.50965	5.25569	Intergenic	Lx7|LINE|L1
APP	chr4	93361582	93361854	273	93361765	8	7.28	5.32607	3.17509	Intergenic	L1Md_T|LINE|L1
APP	chr4	94004119	94004318	200	94004255	8	6.23645	4.68292	2.37084	Intergenic	L1Md_A|LINE|L1
APP	chr4	95788602	95788801	200	95788638	9	8.00723	5.65536	3.78597	Intron	(TTTC)n|Simple_repeat|Simple_repeat		Cyp2j12	NM_001100182
APP	chr4	102376664	102376923	260	102376781	11	10.3617	6.78644	5.92478	Intergenic	L1Md_A|LINE|L1		Pde4b;Sgip1	NM_001285859;NM_144906;NM_019840;NM_001285852;NM_001285860;NM_001285862;NM_001177982;NM_001177981;NM_001177980
APP	chr4	103051089	103051337	249	103051271	9	5.29738	3.94249	1.75791	Promoter	L1Md_T|LINE|L1		Gm12718	NR_040673
APP	chr4	104553376	104553755	380	104553444	13	8.94978	5.51949	4.62623	Promoter	(TCTCTG)n|Simple_repeat|Simple_repeat		C8a	NM_146148;NM_001290645
APP	chr4	104970296	104970567	272	104970413	9	6.95815	5.00325	2.94082	Intergenic	L1Md_T|LINE|L1		Ppap2b	NM_080555
APP	chr4	105296176	105296407	232	105296306	16	8.34669	4.60853	4.10707	Intergenic	L1Md_T|LINE|L1
APP	chr4	105409905	105410187	283	105410055	8	7.28	5.32607	3.17509	Intergenic	L1Md_T|LINE|L1
APP	chr4	105850678	105850877	200	105850846	9	5.29738	3.94249	1.75791	Intergenic	L1Md_A|LINE|L1
APP	chr4	111529878	111530094	217	111530044	6	5.0922	4.1425	1.60528	Intergenic	L1Md_T|LINE|L1		Slc5a9;Spata6;Skint8	NM_145551;NM_001100466;NM_026470
APP	chr4	111606814	111607093	280	111606901	13	6.79314	4.23639	2.84948	Intron	L1Md_T|LINE|L1		Skint8	NM_001100466
APP	chr4	111938395	111938594	200	111938492	10	6.15787	4.33674	2.31281	Intron	L1Md_F2|LINE|L1		Skint3	NM_177578;NM_001102474
APP	chr4	112219179	112219383	205	112219210	10	6.15787	4.33674	2.31281	Intergenic	L1Md_F2|LINE|L1		Skint2	NM_001285965;NM_001285963
APP	chr4	112425268	112425473	206	112425366	8	7.28	5.32607	3.17509	Intron	L1_Mus1|LINE|L1		Skint10	NM_177668
APP	chr4	112726462	112726661	200	112726566	9	8.44414	5.91786	4.15533	Intron	intron (NM_001103199, intron 18 of 48)		Skint6	NM_001103199
APP	chr4	113637939	113638141	203	113637993	9	6.95815	5.00325	2.94082	Intron	L1Md_F2|LINE|L1		Skint5	NM_001167876;NM_001167878
APP	chr4	113747231	113747452	222	113747269	10	9.1658	6.2209	4.81433	Intergenic	L1Md_T|LINE|L1		Skint11;Skint5	NM_001167876;NM_177669;NM_001166027;NM_001167878
APP	chr4	113974223	113974484	262	113974422	6	5.0922	4.1425	1.60528	Intergenic	(CA)n|Simple_repeat|Simple_repeat		Skint11	NM_177669;NM_001166027
APP	chr4	114816967	114817166	200	114817096	9	8.44414	5.91786	4.15533	Intergenic	L1Md_A|LINE|L1		Cyp4a29;Cyp4x1;Tal1;Pdzk1ip1	NM_001100183;NM_001164558;NM_001003947;NM_011527;NM_001287388;NM_026018;NM_001164557
APP	chr4	114817697	114817933	237	114817828	12	7.9867	5.12524	3.78597	Intergenic	L1Md_A|LINE|L1		Cyp4a29;Cyp4x1;Tal1;Pdzk1ip1	NM_001100183;NM_001164558;NM_001003947;NM_011527;NM_001287388;NM_026018;NM_001164557
APP	chr4	118219683	118219903	221	118219849	104	9.86977	1.95808	5.46595	Promoter	G-rich|Low_complexity|Low_complexity		Tmem125	NM_172383
APP	chr4	118220349	118220572	224	118220517	129	8.67633	1.73912	4.37455	Promoter	G-rich|Low_complexity|Low_complexity		Tmem125	NM_172383
APP	chr4	118220673	118221179	507	118221144	122	9.59227	1.83396	5.21282	Promoter	G-rich|Low_complexity|Low_complexity		Tmem125	NM_172383
APP	chr4	120998684	120998883	200	120998738	9	6.3968	4.64609	2.49375	Promoter	L1Md_Gf|LINE|L1		Gm12888	NM_001033791
APP	chr4	121104986	121105201	216	121105016	9	6.95815	5.00325	2.94082	Intergenic	L1Md_F2|LINE|L1		Gm12886	NM_001144948
APP	chr4	121353932	121354142	211	121354065	9	8.44414	5.91786	4.15533	Intergenic	(CA)n|Simple_repeat|Simple_repeat		Gm12887	NM_001099309
APP	chr4	121922859	121923107	249	121922909	9	5.29738	3.94249	1.75791	Intergenic	L1Md_F2|LINE|L1
APP	chr4	126849093	126849312	220	126849231	11	10.8917	7.10143	6.42636	Intron	(TG)n|Simple_repeat|Simple_repeat		Dlgap3	NM_198618
APP	chr4	129833825	129834093	269	129833950	11	10.3617	6.78644	5.92478	Intergenic	(CA)n|Simple_repeat|Simple_repeat		Tinagl1;Serinc2;Hcrtr1;Gm853;Col16a1;Pef1	NM_001253386;NM_026441;NM_023476;NM_198959;NM_028266;NM_172702;NM_001163027;NM_001168333;NM_001034872
APP	chr4	134441591	134441790	200	134441678	10	4.52246	3.3286	1.33676	Intron	(TTTCC)n|Simple_repeat|Simple_repeat		Rhd	NM_011270
APP	chr4	137541529	137541934	406	137541717	15	6.76886	3.92838	2.82812	Intergenic	(TG)n|Simple_repeat|Simple_repeat		Eif4g3;Ece1	NM_172703;NM_199307;NM_001256198;NM_001256195
APP	chr4	138951811	138952030	220	138951922	9	8.44414	5.91786	4.15533	Intron	(TG)n|Simple_repeat|Simple_repeat		Ubr4	NM_001160319
APP	chr4	142006050	142006249	200	142006190	15	9.56811	5.47836	5.19029	Intergenic	(TG)n|Simple_repeat|Simple_repeat
APP	chr4	142147208	142147407	200	142147263	7	6.16097	4.73429	2.31281	Intergenic	RLTR10-int|LTR|ERVK
APP	chr4	143763559	143763758	200	143763628	9	4.47771	3.42398	1.32716	Intergenic	L1Md_A|LINE|L1		Oog3;Pramel5;Gm13102;Oog2;C87977	NM_198661;NM_001085419;NM_001085418;NM_001177542;NM_201258
APP	chr4	144240663	144240987	325	144240855	10	9.64919	6.50965	5.25569	Intergenic	L1Md_T|LINE|L1		Gm13124;Gm13178;Gm13177;Gm436	NM_001085536;NM_001085504;NM_001081248;NM_001085542
APP	chr4	145360100	145360338	239	145360205	11	5.24649	3.63119	1.72439	Intergenic	L1_Mur1|LINE|L1		Gm13238;Gm13242	NR_033612;NM_001103158
APP	chr4	145383734	145383936	203	145383851	14	8.64403	5.13596	4.34319	Intergenic	Lx2|LINE|L1		Gm13238;Gm13242	NR_033612;NM_001103158
APP	chr4	145959467	145959697	231	145959543	9	6.31981	4.59686	2.45121	Intergenic	(TTTC)n|Simple_repeat|Simple_repeat		Gm13034	NR_030771
APP	chr4	146148373	146148572	200	146148456	13	7.74751	4.79357	3.58134	Intron	intron (NM_001177545, intron 2 of 4)		Zfp600	NM_001177546;NM_001177545
APP	chr4	152121521	152121784	264	152121594	9	6.3968	4.64609	2.49375	Intergenic	L1Md_F2|LINE|L1		Gm833	NR_033138
APP	chr4	152527046	152527420	375	152527223	92	7.62311	1.83973	3.46838	Intergenic	(TTAGGG)n|Simple_repeat|Simple_repeat
APP	chr4	154613031	154613373	343	154613098	9	8.00723	5.65536	3.78597	Intergenic	(CA)n|Simple_repeat|Simple_repeat		2610002J02Rik;Ski;Prkcz;Morn1	NM_008860;NM_001039079;NR_033802;NM_001081100;NM_001190445;NM_011385
APP	chr5	3986174	3986469	296	3986188	9	5.29738	3.94249	1.75791	Intron	L1Md_T|LINE|L1		Akap9	NM_194462
APP	chr5	4942038	4942237	200	4942069	12	7.9867	5.12524	3.78597	Intron	L1Md_T|LINE|L1		Cdk14	NM_011074
APP	chr5	5804996	5805256	261	5805143	9	8.38968	5.8855	4.14211	Intergenic	L1Md_A|LINE|L1		Steap1	NM_027399
APP	chr5	6005277	6005476	200	6005400	8	7.28	5.32607	3.17509	Intergenic	L1Md_F2|LINE|L1
APP	chr5	6420038	6420237	200	6420158	10	6.15787	4.33674	2.31281	Intergenic	L1Md_F2|LINE|L1
APP	chr5	6470322	6470625	304	6470496	10	5.24289	3.76637	1.72298	Intergenic	L1Md_T|LINE|L1
APP	chr5	6616053	6616501	449	6616394	8	6.23645	4.68292	2.37084	Intergenic	L1Md_F2|LINE|L1
APP	chr5	8553203	8553402	200	8553267	8	7.28	5.32607	3.17509	Intron	intron (NM_198620, intron 5 of 9)		Rundc3b	NM_198620
APP	chr5	9052468	9052775	308	9052594	10	9.1658	6.2209	4.81433	Intergenic	L1Md_T|LINE|L1		Crot;Tmem243;Dmtf1;Abcb4	NM_023733;NM_011806;NM_001110327;NM_008830;NM_001081029
APP	chr5	11363634	11363838	205	11363775	11	10.8256	7.0626	6.36697	Intergenic	Intergenic		Speer1-ps1	NR_001586
APP	chr5	11460312	11460582	271	11460443	10	6.15787	4.33674	2.31281	Intergenic	L1Md_T|LINE|L1
APP	chr5	11617013	11617242	230	11617186	8	7.28	5.32607	3.17509	Intergenic	Intergenic		Gm6460	NM_001037919
APP	chr5	12481499	12481758	260	12481591	9	8.44414	5.91786	4.15533	Intron	(GGA)n|Simple_repeat|Simple_repeat		Sema3d	NM_028882
APP	chr5	12740369	12740610	242	12740437	6	5.08572	4.13856	1.60528	Intergenic	L1Md_F2|LINE|L1
APP	chr5	13914722	13914921	200	13914734	8	6.88952	5.08983	2.88239	Intergenic	(CA)n|Simple_repeat|Simple_repeat
APP	chr5	17782481	17782680	200	17782522	9	8.00723	5.65536	3.78597	Intron	L1Md_A|LINE|L1		Gnai1	NM_010305
APP	chr5	18047000	18047199	200	18047040	9	8.00723	5.65536	3.78597	Intergenic	L1Md_A|LINE|L1
APP	chr5	19409334	19409533	200	19409467	8	7.28	5.32607	3.17509	Promoter	(GAA)n|Simple_repeat|Simple_repeat		Magi2	NM_015823;NM_001170745
APP	chr5	19446779	19446978	200	19446900	7	6.16097	4.73429	2.31281	Intron	intron (NM_015823, intron 1 of 21)		Magi2	NM_015823;NM_001170745;NM_001170746
APP	chr5	19847362	19847574	213	19847476	8	7.28	5.32607	3.17509	Intron	L1Md_F3|LINE|L1		Magi2	NM_015823;NM_001170745;NM_001170746
APP	chr5	20861657	20861902	246	20861827	11	8.40176	5.5753	4.14211	Intron	(TG)n|Simple_repeat|Simple_repeat		Ccdc146	NM_029195
APP	chr5	23729435	23729719	285	23729451	9	5.29738	3.94249	1.75791	Intergenic	(CA)n|Simple_repeat|Simple_repeat		Mir684-1;Klhl7;Nupl2;Kcnh2	NM_026448;NM_153092;NM_001294162;NM_001161800;NR_030454;NM_013569
APP	chr5	24638488	24638815	328	24638632	11	8.40176	5.5753	4.14211	Intergenic	L1Md_A|LINE|L1		Galntl5;2900005J15Rik;Prkag2;Galnt11	NM_026449;NM_144908;NM_145401;NR_027851
APP	chr5	27556245	27556486	242	27556340	11	9.89567	6.50387	5.48726	Intron	L1Md_A|LINE|L1		Dpp6	NM_207282;NM_010075;NM_001198886
APP	chr5	28918468	28918811	344	28918629	10	7.38071	5.1107	3.24811	Intron	L1Md_T|LINE|L1		9530036O11Rik	NR_015562
APP	chr5	29505172	29505422	251	29505249	8	5.23085	4.03737	1.72298	Intergenic	L1Md_T|LINE|L1		Rnf32;Lmbr1	NM_020295;NR_110371;NM_001289757;NM_021470
APP	chr5	30377139	30377338	200	30377223	7	6.16097	4.73429	2.31281	Intergenic	L1Md_F2|LINE|L1		Gm4961;Gareml;Hadha;3110082J24Rik;Il6;Tyms;Mir6362	NR_105781;NM_001167879;NM_021288;NM_031168;NR_045694;NR_033402;NM_001256263;NM_178878
APP	chr5	37051943	37052443	501	37052277	134	34.7985	3.56434	29.9442	Intron	intron (NM_001081232, intron 2 of 7)		D5Ertd579e	NM_001081232
APP	chr5	40313508	40313721	214	40313562	9	8.00723	5.65536	3.78597	Intergenic	L1Md_F2|LINE|L1
APP	chr5	40799952	40800197	246	40800130	7	6.16097	4.73429	2.31281	Intergenic	L1Md_A|LINE|L1
APP	chr5	42396924	42397123	200	42397008	9	8.00723	5.65536	3.78597	Intergenic	L1Md_T|LINE|L1
APP	chr5	42434463	42434714	252	42434642	9	5.91327	4.33652	2.20402	Intergenic	L1Md_A|LINE|L1
APP	chr5	43404048	43404247	200	43404171	7	6.16097	4.73429	2.31281	Intergenic	L1Md_T|LINE|L1
APP	chr5	43709729	43709982	254	43709732	7	5.81683	4.52429	2.11363	Intergenic	L1Md_A|LINE|L1		Gm7854;Cpeb2	NR_028417;NM_001177379;NM_175937
APP	chr5	44843310	44843515	206	44843384	12	9.81579	6.26347	5.4145	Intergenic	L1Md_A|LINE|L1		Ldb2	NM_001286348;NM_010698;NM_001077398
APP	chr5	46658999	46659201	203	46659109	11	8.40176	5.5753	4.14211	Intergenic	L1Md_T|LINE|L1
APP	chr5	55556694	55556971	278	55556818	8	6.88952	5.08983	2.88239	Intergenic	L1Md_A|LINE|L1
APP	chr5	55596280	55596526	247	55596465	9	8.00723	5.65536	3.78597	Intergenic	L1Md_T|LINE|L1
APP	chr5	56039843	56040243	401	56040009	11	6.0447	4.10877	2.31281	Intergenic	L1Md_A|LINE|L1
APP	chr5	56054110	56054342	233	56054158	13	10.5442	6.50452	6.0968	Intergenic	L1Md_A|LINE|L1
APP	chr5	56584523	56584722	200	56584629	6	5.08572	4.13856	1.60528	Intergenic	L1Md_T|LINE|L1
APP	chr5	58374806	58375006	201	58374897	10	9.64919	6.50965	5.25569	Intron	intron (NM_001122758, intron 2 of 2)		Pcdh7	NM_001122758
APP	chr5	58702165	58702400	236	58702274	10	7.38071	5.1107	3.24811	Intergenic	L1Md_A|LINE|L1
APP	chr5	59320554	59320753	200	59320610	7	6.16097	4.73429	2.31281	Intergenic	L1Md_A|LINE|L1
APP	chr5	59362202	59362473	272	59362348	8	7.27152	5.32101	3.17509	Intergenic	L1Md_A|LINE|L1
APP	chr5	59703577	59703776	200	59703635	12	9.12349	5.83176	4.78899	Intergenic	L1Md_A|LINE|L1
APP	chr5	60799512	60799711	200	60799603	9	8.00723	5.65536	3.78597	Intergenic	A-rich|Low_complexity|Low_complexity
APP	chr5	60855577	60855776	200	60855696	6	5.0922	4.1425	1.60528	Intergenic	L1Md_Gf|LINE|L1
APP	chr5	60939250	60939490	241	60939341	9	8.00723	5.65536	3.78597	Intergenic	L1Md_F|LINE|L1
APP	chr5	61686335	61686537	203	61686449	10	9.1658	6.2209	4.81433	Intergenic	L1Md_T|LINE|L1
APP	chr5	62620918	62621155	238	62621094	8	6.88952	5.08983	2.88239	Intergenic	L1Md_T|LINE|L1
APP	chr5	63804190	63804621	432	63804307	12	6.88037	4.45117	2.88239	Intergenic	(CA)n|Simple_repeat|Simple_repeat
APP	chr5	64049748	64049947	200	64049783	8	5.02354	3.90287	1.60528	Intron	L1Md_T|LINE|L1		Nwd2	NM_177006
APP	chr5	70733288	70733487	200	70733306	10	7.38071	5.1107	3.24811	Intergenic	L1Md_F3|LINE|L1
APP	chr5	70788179	70788382	204	70788255	9	8.44414	5.91786	4.15533	Intergenic	L1Md_T|LINE|L1
APP	chr5	73327620	73327914	295	73327733	8	7.28	5.32607	3.17509	Intron	L1Md_T|LINE|L1		Slain2	NM_153567;NM_001113423
APP	chr5	74222954	74223153	200	74223078	9	8.00723	5.65536	3.78597	Intergenic	(GGAA)n|Simple_repeat|Simple_repeat
APP	chr5	74243307	74243506	200	74243389	8	7.28	5.32607	3.17509	Intergenic	Intergenic
APP	chr5	76602500	76602747	248	76602605	7	5.81683	4.52429	2.11363	Intergenic	L1Md_A|LINE|L1		Srd5a3;Tmem165;Clock	NM_020611;NM_007715;NM_001289826;NM_011626
APP	chr5	76650017	76650264	248	76650079	7	6.16097	4.73429	2.31281	Intron	L1Md_T|LINE|L1		Clock	NM_007715;NM_001289826
APP	chr5	76932518	76932717	200	76932581	7	6.16097	4.73429	2.31281	Intron	(GAA)n|Simple_repeat|Simple_repeat		Gm7271	NR_033501
APP	chr5	79462924	79463123	200	79463015	9	5.29738	3.94249	1.75791	Intergenic	L1Md_T|LINE|L1
APP	chr5	79540806	79541066	261	79540965	11	8.40176	5.5753	4.14211	Intergenic	L1Md_T|LINE|L1
APP	chr5	80471269	80471468	200	80471322	6	4.7943	3.95876	1.46767	Intergenic	Intergenic
APP	chr5	80990242	80990451	210	80990424	8	5.45343	4.18148	1.87107	Intergenic	L1Md_F2|LINE|L1
APP	chr5	82004982	82005336	355	82005180	13	10.5442	6.50452	6.0968	Intron	L1Md_A|LINE|L1		Lphn3	NM_198702
APP	chr5	82134763	82134962	200	82134860	7	6.16097	4.73429	2.31281	Intron	L1Md_T|LINE|L1		Lphn3	NM_198702
APP	chr5	82136365	82136671	307	82136506	11	8.40176	5.5753	4.14211	Intron	L1Md_T|LINE|L1		Lphn3	NM_198702
APP	chr5	82425516	82425765	250	82425672	8	5.95334	4.50292	2.23333	Intergenic	L1Md_F2|LINE|L1
APP	chr5	85184709	85184912	204	85184804	11	10.8917	7.10143	6.42636	Intergenic	L1Md_T|LINE|L1
APP	chr5	85681817	85682092	276	85681906	9	8.44414	5.91786	4.15533	Intergenic	L1Md_F2|LINE|L1
APP	chr5	86796561	86796807	247	86796664	11	8.40176	5.5753	4.14211	Intron	L1Md_T|LINE|L1		Tmprss11d	NM_145561
APP	chr5	86980865	86981109	245	86980941	7	5.81683	4.52429	2.11363	Intron	L1Md_T|LINE|L1		Tmprss11f	NM_178730
APP	chr5	90525941	90526224	284	90526119	9	6.3968	4.64609	2.49375	Intergenic	L1Md_T|LINE|L1
APP	chr5	91422935	91423134	200	91423066	9	8.00723	5.65536	3.78597	Intron	L1Md_T|LINE|L1		Mthfd2l	NM_026788
APP	chr5	91489049	91489370	322	91489196	9	8.44414	5.91786	4.15533	Intergenic	L1Md_A|LINE|L1		Areg;Mthfd2l;Epgn;Ereg	NM_007950;NM_053087;NM_026788;NM_009704
APP	chr5	92114335	92114560	226	92114394	6	4.7943	3.95876	1.46767	Intergenic	L1Md_A|LINE|L1		1700063O14Rik;Parm1	NM_145562;NR_045383
APP	chr5	93718528	93718881	354	93718698	72	12.4891	2.58204	7.96245	Intergenic	(CCCTAA)n|Simple_repeat|Simple_repeat		2010109A12Rik;Ccng2;Ccni	NM_029363;NM_017367;NM_007635
APP	chr5	93740301	93740500	200	93740352	9	7.62344	5.41989	3.46838	Intergenic	L1Md_A|LINE|L1		2010109A12Rik;Ccng2	NM_029363;NM_007635
APP	chr5	93764749	93764948	200	93764822	7	6.16097	4.73429	2.31281	Intergenic	L1Md_F2|LINE|L1		Ccng2	NM_007635
APP	chr5	93983901	93984100	200	93984007	9	8.00723	5.65536	3.78597	Intergenic	L1Md_T|LINE|L1		C87414	NM_001164284;NM_001164285
APP	chr5	93984317	93984571	255	93984439	12	11.0848	7.04586	6.61119	Intergenic	L1Md_T|LINE|L1		C87414	NM_001164284;NM_001164285
APP	chr5	94075747	94075946	200	94075829	9	6.3968	4.64609	2.49375	Intron	L1Md_T|LINE|L1		C87414	NM_001164284;NM_001164285
APP	chr5	94435320	94435519	200	94435495	10	6.60066	4.61638	2.67229	Intergenic	L1Md_F2|LINE|L1
APP	chr5	94740466	94740668	203	94740610	13	7.74751	4.79357	3.58134	Intergenic	Lx7|LINE|L1		AA792892	NM_178894
APP	chr5	94853764	94853972	209	94853890	9	7.309	5.22412	3.20269	Intergenic	L1_Mur2|LINE|L1		AA792892	NM_178894
APP	chr5	95067306	95067505	200	95067386	11	9.89567	6.50387	5.48726	Intergenic	(CA)n|Simple_repeat|Simple_repeat		Gm3139	NM_001243937;NM_001243938
APP	chr5	95109940	95110176	237	95110080	11	5.24649	3.63119	1.72439	Intergenic	T-rich|Low_complexity|Low_complexity
APP	chr5	95195092	95195304	213	95195195	14	11.2716	6.72896	6.79076	Intergenic	L1Md_F2|LINE|L1
APP	chr5	95284610	95284811	202	95284665	11	8.73073	5.78167	4.42486	Intergenic	B1_Mm|SINE|Alu
APP	chr5	96030478	96030680	203	96030546	11	7.05525	4.73099	3.02535	Intergenic	Lx2B|LINE|L1		Gm3286	NM_001167793
APP	chr5	96169866	96170079	214	96169993	11	9.89567	6.50387	5.48726	Intergenic	Intergenic
APP	chr5	96317747	96317961	215	96317897	7	6.16097	4.73429	2.31281	Intergenic	L1Md_F2|LINE|L1		Cxcl13	NM_018866
APP	chr5	96447167	96447546	380	96447455	9	7.27567	5.20324	3.17509	Intergenic	L1Md_A|LINE|L1		Cxcl13;Cnot6l	NM_001285514;NM_018866;NM_178854;NM_001285511;NM_144910
APP	chr5	98919586	98919808	223	98919635	6	5.0922	4.1425	1.60528	Intron	L1Md_F2|LINE|L1		1700007G11Rik	NM_001024614
APP	chr5	99342958	99343168	211	99343012	12	6.88037	4.45117	2.88239	Intergenic	L1Md_T|LINE|L1		Bmp3;Prkg2	NM_008926;NM_173404
APP	chr5	100251935	100252195	261	100252078	8	7.28	5.32607	3.17509	Intergenic	(TG)n|Simple_repeat|Simple_repeat		A930011G23Rik	NR_030692
APP	chr5	102619637	102619836	200	102619767	7	6.16097	4.73429	2.31281	Intergenic	RMER16-int|LTR|ERVK
APP	chr5	105043476	105043759	284	105043673	9	6.3968	4.64609	2.49375	Intergenic	L1Md_T|LINE|L1		D930016D06Rik;BC005561	NM_001166581;NR_030673
APP	chr5	105204535	105204790	256	105204603	12	6.00417	3.93379	2.28002	Intergenic	L1Md_Gf|LINE|L1		Zfp951	NM_001039231
APP	chr5	105595474	105595724	251	105595562	10	9.1658	6.2209	4.81433	Intergenic	L1Md_F2|LINE|L1		Gbp9;Gbp10;Gbp4	NM_001256005;NM_172777;NM_008620;NM_001039646
APP	chr5	106605811	106606016	206	106605840	73	11.8179	2.4825	7.31372	Intergenic	Intergenic
APP	chr5	106766544	106766782	239	106766677	9	8.00723	5.65536	3.78597	Intergenic	(CATAA)n|Simple_repeat|Simple_repeat
APP	chr5	109177123	109177488	366	109177297	30	32.4905	14.4029	27.6756	Intergenic	Intergenic		1700047L14Rik;Fgfrl1;Dgkq;Slc26a1;Vmn2r9;Vmn2r8;Idua;Tmed11	NM_026109;NM_172997;NM_174870;NM_001164259;NM_001104620;NM_001104621;NM_054071;NM_199011;NR_040691;NM_008325
APP	chr5	109311092	109311345	254	109311152	8	7.28	5.32607	3.17509	Intergenic	L1Md_Gf|LINE|L1		Vmn2r9;Tmed11;Vmn2r8	NM_026109;NM_001104620;NM_001104621
APP	chr5	109578560	109578759	200	109578649	7	6.16097	4.73429	2.31281	Intergenic	L1Md_A|LINE|L1		Vmn2r14;Vmn2r13;Vmn2r12;Vmn2r11	NM_001104624;NM_001104625;NM_001104622;NM_001104623
APP	chr5	109772307	109772506	200	109772420	7	6.16097	4.73429	2.31281	Intron	Lx3_Mus|LINE|L1		Vmn2r16	NM_001104627
APP	chr5	111391593	111391792	200	111391727	8	6.88952	5.08983	2.88239	Intron	intron (NM_001267622, intron 2 of 23)		Ttc28	NM_001267622
APP	chr5	111392378	111392591	214	111392433	10	8.35562	5.72357	4.11055	Intron	intron (NM_001267622, intron 2 of 23)		Ttc28	NM_001267622
APP	chr5	111393648	111394035	388	111393788	9	8.44414	5.91786	4.15533	Intron	intron (NM_001267622, intron 2 of 23)		Ttc28	NM_001267622
APP	chr5	115121525	115121745	221	115121706	12	6.33247	4.12561	2.46365	Intron	AT_rich|Low_complexity|Low_complexity		Gltp	NM_019821
APP	chr5	115122457	115122678	222	115122491	8	6.54678	4.8779	2.62118	Intron	B2_Mm2|SINE|B2		Gltp	NM_019821
APP	chr5	128676240	128676458	219	128676327	7	6.16097	4.73429	2.31281	Intron	L1Md_A|LINE|L1		Tmem132d	NM_172885
APP	chr5	132599426	132599668	243	132599515	10	7.67996	5.29986	3.51865	Intron	L1Md_T|LINE|L1		Auts2	NM_177047
APP	chr5	133483391	133483613	223	133483507	10	9.64919	6.50965	5.25569	Intergenic	L1Md_T|LINE|L1
APP	chr5	134178073	134178301	229	134178197	13	7.74751	4.79357	3.58134	Intergenic	L1Md_F2|LINE|L1
APP	chr5	146852668	146852867	200	146852824	8	7.28	5.32607	3.17509	Intergenic	L1Md_T|LINE|L1		Cyp3a59;Cyp3a25	NR_030782;NM_001105160;NM_019792
APP	chr5	149467980	149468228	249	149468049	11	6.0447	4.10877	2.31281	Intergenic	(TG)n|Simple_repeat|Simple_repeat		2210417A02Rik	NR_028285
APP	chr5	149893937	149894150	214	149893987	13	6.79314	4.23639	2.84948	Intergenic	(CA)n|Simple_repeat|Simple_repeat		5930430L01Rik;Gm15408;Hmgb1;Gm8615;5730422E09Rik	NR_040429;NR_028061;NM_010439;NR_015478;NR_102383;NR_102384
APP	chr5	150161905	150162188	284	150162021	13	10.5442	6.50452	6.0968	Intergenic	(CA)n|Simple_repeat|Simple_repeat		Tex26;Alox5ap;Medag	NM_027519;NM_029464;NM_009663
APP	chr5	152459206	152459560	355	152459362	13	12.8544	7.91751	8.31498	Intergenic	L1Md_T|LINE|L1		Rfc3;Vmn2r18	NM_001102582;NM_027009
APP	chr5	152537001	152537259	259	152537193	136	13.0641	1.99695	8.51928	Intergenic	(TTAGGG)n|Simple_repeat|Simple_repeat		Rfc3	NM_027009
APP	chr6	3769937	3770195	259	3769999	10	7.67996	5.29986	3.51865	Intergenic	L1Md_T|LINE|L1		Mir653;Calcr;Mir489	NM_001042725;NR_030250;NR_030612;NM_007588
APP	chr6	6937706	6937913	208	6937806	11	5.24649	3.63119	1.72439	Intron	L1Md_T|LINE|L1		Acn9	NM_001077713
APP	chr6	7436547	7436746	200	7436697	9	7.8879	5.5826	3.7141	Intergenic	L1Md_T|LINE|L1		Tac1	NM_009311
APP	chr6	7585171	7585535	365	7585435	6	5.08572	4.13856	1.60528	Intergenic	L1Md_F2|LINE|L1		Tac1;Asns	NM_009311;NM_012055
APP	chr6	7651202	7651507	306	7651272	7	6.16097	4.73429	2.31281	Intergenic	L1Md_T|LINE|L1		Asns	NM_012055
APP	chr6	7651836	7652074	239	7651903	7	4.55469	3.71687	1.33676	Intergenic	L1Md_T|LINE|L1		Asns	NM_012055
APP	chr6	7872937	7873233	297	7873128	8	7.27152	5.32101	3.17509	Intergenic	L1Md_A|LINE|L1		C1galt1;Col28a1	NM_052993;NM_001037865
APP	chr6	9271520	9271719	200	9271591	8	6.88952	5.08983	2.88239	Intergenic	L1Md_F2|LINE|L1		Nxph1	NM_008751
APP	chr6	9555406	9555645	240	9555549	10	6.84342	4.77017	2.88239	Intergenic	L1Md_T|LINE|L1
APP	chr6	10625934	10626133	200	10626039	7	6.16097	4.73429	2.31281	Intergenic	L1Md_A|LINE|L1
APP	chr6	11157194	11157553	360	11157391	10	5.24289	3.76637	1.72298	Intergenic	L1Md_A|LINE|L1
APP	chr6	11203479	11203723	245	11203598	8	7.28	5.32607	3.17509	Intergenic	L1Md_A|LINE|L1
APP	chr6	11291061	11291369	309	11291177	11	9.47285	6.24389	5.10036	Intergenic	(CA)n|Simple_repeat|Simple_repeat
APP	chr6	11784954	11785180	227	11785052	9	8.00723	5.65536	3.78597	Intergenic	L1Md_A|LINE|L1		Phf14;Ndufa4	NM_029404;NM_010886;NM_001168382
APP	chr6	12230555	12230805	251	12230676	10	9.64919	6.50965	5.25569	Intergenic	L1Md_T|LINE|L1		Thsd7a	NM_001164805
APP	chr6	13447491	13447844	354	13447667	10	8.00362	5.50357	3.78597	Intergenic	L1Md_T|LINE|L1		Tmem168;1700016P04Rik	NR_038149;NM_028990
APP	chr6	15964048	15964258	211	15964144	10	6.15787	4.33674	2.31281	Intergenic	(CA)n|Simple_repeat|Simple_repeat
APP	chr6	17486740	17487042	303	17486869	13	8.94978	5.51949	4.62623	Intron	intron (NM_008591, intron 11 of 21)		Met	NM_008591
APP	chr6	18937178	18937377	200	18937257	9	8.00723	5.65536	3.78597	Intergenic	L1Md_T|LINE|L1
APP	chr6	20082343	20082625	283	20082489	15	10.9626	6.30799	6.49413	Intergenic	L1Md_T|LINE|L1
APP	chr6	21403325	21403559	235	21403382	8	5.45343	4.18148	1.87107	Intron	L1Md_T|LINE|L1		Kcnd2	NM_019697
APP	chr6	22077163	22077408	246	22077229	14	9.94237	5.91374	5.53008	Intron	L1Md_T|LINE|L1		Cped1	NM_001081351
APP	chr6	22079144	22079343	200	22079191	9	6.3968	4.64609	2.49375	Intron	L1Md_T|LINE|L1		Cped1	NM_001081351
APP	chr6	22734393	22734592	200	22734542	6	5.0922	4.1425	1.60528	Intergenic	L1Md_F2|LINE|L1		Ptprz1	NM_001081306
APP	chr6	23462575	23462795	221	23462730	11	5.24649	3.63119	1.72439	Intron	L1Md_T|LINE|L1		Cadps2	NM_153163;NM_001252108;NM_001252110;NM_001252107;NM_001252106;NM_001252105
APP	chr6	23508927	23509145	219	23508978	9	7.62344	5.41989	3.46838	Intron	L1Md_T|LINE|L1		Cadps2	NM_153163;NM_001252108;NM_001252110;NM_001252107;NM_001252106;NM_001252105
APP	chr6	23722050	23722249	200	23722210	8	7.28	5.32607	3.17509	Intron	L1Md_T|LINE|L1		Cadps2	NM_153163;NM_001252109;NM_001252108;NM_001252110;NM_001252107;NM_001252106;NM_001252105
APP	chr6	24443280	24443506	227	24443446	8	6.54678	4.8779	2.62118	Intron	L1Md_T|LINE|L1		Iqub	NM_172535
APP	chr6	25172417	25172687	271	25172502	15	10.9626	6.30799	6.49413	Intergenic	L1Md_T|LINE|L1
APP	chr6	25505575	25505840	266	25505724	12	9.12349	5.83176	4.78899	Intergenic	L1Md_T|LINE|L1
APP	chr6	25937032	25937251	220	25937154	8	5.45343	4.18148	1.87107	Intergenic	L1Md_T|LINE|L1		Gm20756	NR_040771
APP	chr6	27086820	27087019	200	27086836	8	7.28	5.32607	3.17509	Intergenic	Intergenic
APP	chr6	29697764	29698678	915	29698121	81	16.9615	2.94032	12.334	Intron	(CTGTG)n|Simple_repeat|Simple_repeat		Smo	NM_176996
APP	chr6	32045093	32045292	200	32045217	12	9.45707	6.03991	5.0882	Intergenic	L1Md_T|LINE|L1		1700012A03Rik;Plxna4	NM_029587;NM_175750
APP	chr6	35726145	35726394	250	35726303	7	5.24211	4.16259	1.72298	Intergenic	L1Md_A|LINE|L1
APP	chr6	39609974	39610236	263	39610062	7	5.81683	4.52429	2.11363	Intron	B1_Mus2|SINE|Alu		Braf	NM_139294
APP	chr6	42075385	42075739	355	42075469	10	9.1658	6.2209	4.81433	Intergenic	L1Md_T|LINE|L1		Tas2r139;Tas2r144;Sva	NM_001001453;NM_181275;NM_009299
APP	chr6	43942734	43942971	238	43942855	9	5.29738	3.94249	1.75791	Intergenic	L1Md_T|LINE|L1
APP	chr6	44680219	44680437	219	44680397	7	4.55469	3.71687	1.33676	Intergenic	L1Md_T|LINE|L1
APP	chr6	45568384	45568586	203	45568414	8	7.28	5.32607	3.17509	Intron	L1_Mur3|LINE|L1		Cntnap2	NM_001004357
APP	chr6	46545521	46545835	315	46545785	7	6.16097	4.73429	2.31281	Intron	L1Md_A|LINE|L1		Cntnap2	NM_001004357
APP	chr6	47604775	47604978	204	47604851	23	8.37387	3.71836	4.128	Intergenic	TTS (NR_002841).5		Ezh2;Rn4.5s	NM_001146689;NM_007971;NR_002841
APP	chr6	47605104	47605311	208	47605153	24	9.8074	4.17118	5.40701	Intergenic	promoter-TSS (NR_002841).5		Ezh2;Rn4.5s	NM_001146689;NM_007971;NR_002841
APP	chr6	47608470	47608681	212	47608621	26	11.264	4.50487	6.78375	Intergenic	TTS (NR_002841).6		Ezh2;Rn4.5s	NM_001146689;NM_007971;NR_002841
APP	chr6	47692311	47692510	200	47692400	28	12.0097	4.54715	7.49972	Intergenic	(TG)n|Simple_repeat|Simple_repeat		Pdia4;Rn4.5s;Mir704;Zfp398;Zfp786	NR_002841;NM_173034;NM_009787;NM_177882;NM_027477;NR_030485
APP	chr6	47696614	47696813	200	47696704	24	9.19886	3.93417	4.84567	Intergenic	RMER12B|LTR|ERVK		Pdia4;Rn4.5s;Mir704;Zfp398;Zfp786	NR_002841;NM_173034;NM_009787;NM_177882;NM_027477;NR_030485
APP	chr6	47720069	47720268	200	47720149	28	10.0445	3.85127	5.62857	Intergenic	(TG)n|Simple_repeat|Simple_repeat		Pdia4;Rn4.5s;Mir704;Zfp398;Zfp786	NR_002841;NM_173034;NM_009787;NM_177882;NM_027477;NR_030485
APP	chr6	48121755	48122053	299	48121923	14	6.76192	4.06635	2.82158	Intergenic	L1Md_T|LINE|L1		Zfp746	NM_001163475
APP	chr6	49297012	49297211	200	49297122	6	5.0922	4.1425	1.60528	Intergenic	B2_Mm2|SINE|B2		Stk31;Ccdc126;Tra2a;Fam221a	NM_001172216;NM_172727;NM_029916;NM_198102;NM_175098
APP	chr6	50014762	50015122	361	50014937	9	5.29738	3.94249	1.75791	Intergenic	L1Md_F3|LINE|L1		Mpp6	NM_019939;NM_001164734;NM_001164733
APP	chr6	54139006	54139220	215	54139147	10	8.35562	5.72357	4.11055	Intron	(CA)n|Simple_repeat|Simple_repeat		Chn2	NM_001163640
APP	chr6	56183518	56183876	359	56183697	93	12.8409	2.31733	8.30241	Intron	(TTAGGG)n|Simple_repeat|Simple_repeat		Pde1c	NM_001025568;NM_011054;NM_001159960;NM_001159955;NM_001159956;NM_001159957;NM_001159952;NM_001159953
APP	chr6	58126803	58127002	200	58126898	7	6.16097	4.73429	2.31281	Intergenic	L1Md_T|LINE|L1		Vmn1r28;Vmn1r27	NM_134180;NM_134436
APP	chr6	58516909	58517108	200	58516966	6	4.68661	3.89113	1.46279	Intergenic	L1Md_T|LINE|L1		Vmn1r31;Abcg2	NM_001166729;NM_011920
APP	chr6	58684975	58685174	200	58685032	6	5.0922	4.1425	1.60528	Intergenic	(GA)n|Simple_repeat|Simple_repeat		Abcg2;Herc3	NM_011920;NM_028705
APP	chr6	59241069	59241282	214	59241204	10	6.84342	4.77017	2.88239	Intergenic	L1Md_T|LINE|L1		Gprin3;Tigd2	NM_001081145;NM_183183
APP	chr6	59436290	59436489	200	59436405	10	7.38071	5.1107	3.24811	Intergenic	(GA)n|Simple_repeat|Simple_repeat		Gprin3	NM_183183
APP	chr6	60211111	60211310	200	60211190	11	8.40176	5.5753	4.14211	Intergenic	L1Md_T|LINE|L1		A530053G22Rik	NR_015565
APP	chr6	60300962	60301161	200	60301017	6	5.0922	4.1425	1.60528	Intron	L1_Mm|LINE|L1		A530053G22Rik	NR_015565
APP	chr6	62833551	62833750	200	62833649	8	6.88952	5.08983	2.88239	Intergenic	L1Md_A|LINE|L1
APP	chr6	62943231	62943430	200	62943326	7	6.16097	4.73429	2.31281	Intergenic	L1Md_T|LINE|L1
APP	chr6	62943506	62943739	234	62943604	11	7.05525	4.73099	3.02535	Intergenic	L1Md_T|LINE|L1
APP	chr6	65451524	65451754	231	65451630	10	7.67996	5.29986	3.51865	Intergenic	L1Md_A|LINE|L1		Tnip3;C130060K24Rik	NM_001001495;NM_175524
APP	chr6	67339178	67339415	238	67339251	10	9.64919	6.50965	5.25569	Intergenic	(TTC)n|Simple_repeat|Simple_repeat		Il12rb2;Il23r;Serbp1	NM_025814;NM_008354;NM_144548;NM_001113565;NM_001113564;NM_001113566
APP	chr6	67530707	67530923	217	67530814	10	7.10273	4.93457	3.06699	Intergenic	L1Md_T|LINE|L1		Tacstd2;4930515G16Rik;Il23r	NM_020047;NM_144548;NR_003100
APP	chr6	68227928	68228127	200	68227964	8	6.54678	4.8779	2.62118	Intergenic	L1Md_F2|LINE|L1
APP	chr6	69109860	69110080	221	69109926	11	6.0447	4.10877	2.31281	Intergenic	L1Md_T|LINE|L1
APP	chr6	69323245	69323446	202	69323305	8	5.45343	4.18148	1.87107	Intergenic	L1Md_T|LINE|L1		Rprl1	NR_004434
APP	chr6	69419126	69419325	200	69419211	7	6.16097	4.73429	2.31281	Intergenic	L1Md_F2|LINE|L1
APP	chr6	69902977	69903324	348	69903118	11	7.05525	4.73099	3.02535	Intergenic	L1Md_T|LINE|L1
APP	chr6	70574189	70574388	200	70574284	7	6.16097	4.73429	2.31281	Intergenic	L1Md_T|LINE|L1
APP	chr6	76596536	76596789	254	76596635	10	6.15787	4.33674	2.31281	Intergenic	L1Md_A|LINE|L1
APP	chr6	77978438	77978637	200	77978517	8	7.27152	5.32101	3.17509	Intergenic	L1Md_T|LINE|L1		Ctnna2	NM_009819;NM_001109764;NM_145732
APP	chr6	78105947	78106158	212	78106096	11	8.40176	5.5753	4.14211	Intergenic	L1Md_T|LINE|L1
APP	chr6	78592637	78592856	220	78592672	10	7.10273	4.93457	3.06699	Intergenic	L1Md_A|LINE|L1
APP	chr6	78667771	78668052	282	78667873	11	7.05525	4.73099	3.02535	Intergenic	L1Md_A|LINE|L1
APP	chr6	82051667	82051866	200	82051762	9	8.00723	5.65536	3.78597	Intergenic	L1Md_A|LINE|L1		Eva1a	NM_145570
APP	chr6	84716352	84716565	214	84716377	10	7.38071	5.1107	3.24811	Intron	L1Md_T|LINE|L1		Exoc6b	NM_177077
APP	chr6	88028259	88028458	200	88028441	7	6.16097	4.73429	2.31281	Intergenic	GA-rich|Low_complexity|Low_complexity		Rpn1;Gm5577;H1fx;Mir6376;Rab7	NR_105795;NM_133933;NR_026990;NM_198622;NM_009005;NM_001293652;NM_001293653;NM_001293654;NM_001293655
APP	chr6	89482706	89482905	200	89482772	11	10.3617	6.78644	5.92478	Intron	L1Md_T|LINE|L1		Chchd6	NM_025351;NM_001167736
APP	chr6	89717587	89717790	204	89717679	7	6.16097	4.73429	2.31281	Intergenic	L1Md_F2|LINE|L1		Vmn1r41;Vmn1r40;Vmn1r42;Txnrd3	NM_001178059;NM_053230;NM_001178058;NM_001178060;NM_053221;NM_153162;NM_053228
APP	chr6	89780086	89780323	238	89780213	8	5.95334	4.50292	2.23333	Intergenic	L1Md_F2|LINE|L1		Vmn1r41;Vmn1r43;Vmn1r42;Vmn1r44	NM_053230;NM_053227;NM_053221;NM_053220
APP	chr6	92276107	92276334	228	92276216	9	6.3968	4.64609	2.49375	Intergenic	L1Md_A|LINE|L1		Trh;Prickle2	NM_001134461;NM_001081146;NM_009426;NM_001134459;NM_001134460
APP	chr6	95423247	95423446	200	95423365	7	5.81683	4.52429	2.11363	Exon	TTS (NM_011507)		Suclg2	NM_011507
APP	chr6	95933987	95934404	418	95934120	10	9.63869	6.50345	5.25524	Intergenic	L1Md_T|LINE|L1
APP	chr6	96244966	96245165	200	96244999	7	5.81683	4.52429	2.11363	Intron	L1Md_T|LINE|L1		Fam19a1	NM_182808
APP	chr6	96713517	96713716	200	96713602	10	5.24289	3.76637	1.72298	Intergenic	L1Md_T|LINE|L1		Fam19a4	NM_177233
APP	chr6	96727219	96727603	385	96727562	10	9.63869	6.50345	5.25524	Intergenic	L1Md_A|LINE|L1		Fam19a4	NM_177233
APP	chr6	100958565	100958764	200	100958610	8	6.88952	5.08983	2.88239	Intergenic	L1Md_T|LINE|L1
APP	chr6	101695668	101695897	230	101695720	9	8.00723	5.65536	3.78597	Intergenic	L1Md_A|LINE|L1		Gm9871	NR_027989
APP	chr6	102087687	102087904	218	102087794	7	6.16097	4.73429	2.31281	Intergenic	Lx3_Mus|LINE|L1		Cntn3	NM_008779
APP	chr6	102613169	102613381	213	102613206	9	7.62344	5.41989	3.46838	Intergenic	L1Md_F2|LINE|L1
APP	chr6	103264617	103264846	230	103264668	117	12.3921	2.06724	7.86808	Intergenic	Intergenic
APP	chr6	104310650	104311087	438	104311000	8	6.88952	5.08983	2.88239	Intergenic	L1Md_A|LINE|L1
APP	chr6	105415233	105415432	200	105415325	7	5.81683	4.52429	2.11363	Intergenic	L1Md_T|LINE|L1		Gm19757	NR_040297
APP	chr6	105574592	105574816	225	105574645	10	9.1658	6.2209	4.81433	Intergenic	L1Md_T|LINE|L1		Cntn4	NM_001109749;NM_173004
APP	chr6	106349298	106349590	293	106349401	13	6.00973	3.79526	2.28483	Intron	L1Md_T|LINE|L1		Cntn4	NM_001109749;NM_001109751;NM_173004
APP	chr6	107051343	107051683	341	107051516	12	7.9867	5.12524	3.78597	Intergenic	L1Md_T|LINE|L1
APP	chr6	107238751	107238950	200	107238859	12	9.45707	6.03991	5.0882	Intergenic	L1Md_A|LINE|L1
APP	chr6	107249793	107249992	200	107249871	10	6.37265	4.4722	2.49375	Intergenic	L1Md_A|LINE|L1
APP	chr6	107626059	107626310	252	107626239	11	5.24649	3.63119	1.72439	Intergenic	L1Md_T|LINE|L1
APP	chr6	107867317	107867540	224	107867420	9	8.43465	5.91223	4.15533	Intergenic	L1Md_T|LINE|L1
APP	chr6	107940135	107940365	231	107940243	11	10.8917	7.10143	6.42636	Intergenic	L1Md_T|LINE|L1		Setmar	NM_001276356;NM_178391
APP	chr6	108968139	108968338	200	108968289	7	5.81683	4.52429	2.11363	Intergenic	L1Md_A|LINE|L1
APP	chr6	109047488	109047690	203	109047686	11	7.05525	4.73099	3.02535	Intergenic	L1Md_A|LINE|L1
APP	chr6	109904072	109904347	276	109904258	8	4.47711	3.54824	1.32716	Intergenic	L1Md_Gf|LINE|L1
APP	chr6	110339949	110340165	217	110340012	7	6.16097	4.73429	2.31281	Intergenic	L1Md_F2|LINE|L1
APP	chr6	111497729	111497928	200	111497845	12	7.9867	5.12524	3.78597	Intron	L1Md_A|LINE|L1		Grm7	NM_177328
APP	chr6	112175826	112176029	204	112175876	7	6.16097	4.73429	2.31281	Intergenic	Intergenic		Lmcd1;1700054K19Rik;5031434C07Rik	NR_045986;NR_045987;NM_144799;NR_027865
APP	chr6	119911215	119911481	267	119911374	9	8.44414	5.91786	4.15533	Intron	intron (NM_198703, intron 8 of 27)		Wnk1	NM_198703;NM_001199084;NM_001185021;NM_001199083;NM_001185020
APP	chr6	120195581	120195804	224	120195663	9	8.44414	5.91786	4.15533	Intron	(TC)n|Simple_repeat|Simple_repeat		B4galnt3	NM_198884
APP	chr6	121600990	121601189	200	121601044	10	9.1658	6.2209	4.81433	Intron	intron (NM_175628, intron 14 of 35)		A2m	NM_175628
APP	chr6	121603333	121603734	402	121603607	9	8.44414	5.91786	4.15533	Intron	intron (NM_175628, intron 14 of 35)		A2m	NM_175628
APP	chr6	121968807	121969006	200	121968934	7	6.16097	4.73429	2.31281	Intron	L1Md_T|LINE|L1		Mug2	NM_008646
APP	chr6	122175786	122176022	237	122175914	11	10.3617	6.78644	5.92478	Intron	L1Md_T|LINE|L1		Mug-ps1	NR_027619
APP	chr6	122176092	122176307	216	122176214	8	7.27152	5.32101	3.17509	Intron	L1Md_T|LINE|L1		Mug-ps1	NR_027619
APP	chr6	123502497	123502696	200	123502563	11	5.24649	3.63119	1.72439	Intergenic	L1Md_F|LINE|L1		Vmn2r22;Vmn2r21	NM_001104637;NM_001104635
APP	chr6	124063122	124063364	243	124063232	6	4.7943	3.95876	1.46767	Intergenic	L1_Mus1|LINE|L1		Vmn2r26;Vmn2r27	NM_019917;NM_001104642
APP	chr6	128281659	128281858	200	128281683	9	6.3968	4.64609	2.49375	Intron	B2_Mm1a|SINE|B2		Tulp3	NM_011657
APP	chr6	129099724	129099923	200	129099846	7	5.81683	4.52429	2.11363	Intergenic	L1Md_F2|LINE|L1		Klrb1-ps1;Klrb1f;Clec2e;Clec2d;2310001H17Rik	NR_040266;NR_040265;NM_153506;NR_073569;NM_053109;NR_040268;NM_153094;NR_024262;NR_024263
APP	chr6	131047099	131047320	222	131047254	14	9.94237	5.91374	5.53008	Intergenic	L1VL1|LINE|L1
APP	chr6	131137453	131137673	221	131137562	10	9.1658	6.2209	4.81433	Intergenic	L1Md_F2|LINE|L1		Magohb;Klra2	NM_001170851;NM_025564;NM_008462
APP	chr6	131546423	131546726	304	131546562	15	12.8054	7.43374	8.26814	Intergenic	L1Md_F|LINE|L1		Tas2r130;Tas2r114;5430401F13Rik;Tas2r105;Tas2r104;Tas2r107;Tas2r106	NM_001244628;NM_020501;NM_199154;NM_199156;NM_207019;NM_207016;NM_207011
APP	chr6	131714388	131714603	216	131714459	8	6.88952	5.08983	2.88239	Intergenic	L1Md_A|LINE|L1		Tas2r114;Tas2r105;Tas2r104;Tas2r106	NM_207016;NM_020501;NM_207011;NM_207019
APP	chr6	132550024	132550247	224	132550120	9	8.44414	5.91786	4.15533	Exon	exon (NM_031499, exon 2 of 2)		Prp2	NM_031499
APP	chr6	132744662	132744861	200	132744759	7	5.81683	4.52429	2.11363	Intergenic	RMER17D|LTR|ERVK		Tas2r123;Tas2r122;Tas2r121;Tas2r115;Tas2r110;Tas2r136;Tas2r124;Tas2r116;Tas2r117;Tas2r102;Tas2r113	NM_181276;NM_207018;NM_001039128;NM_053212;NM_199155;NM_199153;NM_207020;NM_207021;NM_207026;NM_207024;NM_207025
APP	chr6	132871997	132872196	200	132872111	10	9.1658	6.2209	4.81433	Intergenic	L1Md_F2|LINE|L1		Tas2r123;Tas2r116;Tas2r113;Tas2r125;Tas2r131;Tas2r129;Tas2r109;Tas2r110	NM_053212;NM_199155;NM_207029;NM_207018;NM_207017;NM_207030;NM_207027;NM_207025
APP	chr6	133766981	133767373	393	133767165	9	8.43465	5.91223	4.15533	Intergenic	L1Md_T|LINE|L1		Kap;Gm5886	NM_010594;NM_001177652;NR_111985
APP	chr6	133769657	133769966	310	133769810	7	6.16097	4.73429	2.31281	Intergenic	L1Md_T|LINE|L1		Kap;Gm5886	NM_010594;NM_001177652;NR_111985
APP	chr6	137180600	137180810	211	137180686	9	5.29738	3.94249	1.75791	Intergenic	L1Md_A|LINE|L1		Ptpro;Rerg	NM_001164212;NM_181988;NM_001164401;NM_011216;NM_001164214
APP	chr6	138130446	138130736	291	138130602	8	7.28	5.32607	3.17509	Intergenic	L1Md_T|LINE|L1		Mgst1	NM_019946
APP	chr6	141570567	141570766	200	141570677	9	8.00723	5.65536	3.78597	Intergenic	L1Md_F2|LINE|L1		Slco1b2;Slco1c1	NM_020495;NM_021471;NM_001177772
APP	chr6	142124964	142125167	204	142125055	9	8.00723	5.65536	3.78597	Intron	(GAAA)n|Simple_repeat|Simple_repeat		Slco1a6	NM_023718
APP	chr6	142383396	142383595	200	142383434	6	5.0922	4.1425	1.60528	Intron	L1Md_F2|LINE|L1		Gys2	NM_145572
APP	chr6	147072629	147072828	200	147072783	8	6.88952	5.08983	2.88239	Intergenic	(TTTC)n|Simple_repeat|Simple_repeat		Mrps35;Ppfibp1;Rep15;Mansc4;Klhl42;E330012B07Rik	NM_001170433;NM_001034903;NM_001081237;NM_025620;NM_145573;NR_033640;NM_026221
APP	chr7	3839982	3840285	304	3840157	11	8.40176	5.5753	4.14211	Intron	L1Md_T|LINE|L1		Pira1;Pira7;Pira6;Pira4;Pira11;Gm14548	NM_001166672;NM_011091;NM_011087;NM_011094;NM_011088;NM_001289428
APP	chr7	4621218	4621417	200	4621321	5	4.08013	3.55072	0.98786	Intron	intron (NM_024172, intron 4 of 7)		Hspbp1	NM_024172
APP	chr7	5158023	5158427	405	5158290	8	7.28	5.32607	3.17509	Intergenic	L1_Mus2|LINE|L1		Vmn1r56;Vmn1r57;Vmn1r55;Nlrp2;Rasl2-9;Rfpl4	NM_138954;NM_030740;NM_177690;NM_009028;NM_001166734;NM_001145013;NM_001166706
APP	chr7	5195178	5195377	200	5195309	7	6.16097	4.73429	2.31281	Intergenic	L1Md_F2|LINE|L1		Vmn1r56;Vmn1r57;Vmn1r55;Nlrp2	NM_001166734;NM_030740;NM_001166706;NM_177690
APP	chr7	5394841	5395040	200	5395003	11	7.05525	4.73099	3.02535	Intergenic	L1Md_A|LINE|L1		Gm5065;Vmn1r59;Vmn2r28;Vmn1r58;Nlrp2	NR_003622;NM_207543;NM_177690;NM_030739;NM_001081405
APP	chr7	5813623	5813946	324	5813783	16	16.8124	9.61412	12.1871	Intergenic	L1Md_T|LINE|L1		Vmn1r64	NM_207544
APP	chr7	7465175	7465374	200	7465291	6	5.0922	4.1425	1.60528	Intergenic	Lx2|LINE|L1		Vmn2r33;Vmn2r32	NM_001105063;NM_001105065
APP	chr7	8480622	8480865	244	8480740	9	8.43465	5.91223	4.15533	Intergenic	L1_Mm|LINE|L1		Vmn2r36	NM_001105068
APP	chr7	8992619	8992875	257	8992728	6	5.0922	4.1425	1.60528	Intergenic	L1Md_T|LINE|L1		Vmn2r38;Vmn2r37	NM_009489;NM_001105070
APP	chr7	9385280	9385479	200	9385396	9	6.3968	4.64609	2.49375	Intergenic	L1Md_F2|LINE|L1
APP	chr7	10441350	10441615	266	10441483	11	10.3617	6.78644	5.92478	Intergenic	L1Md_F2|LINE|L1		Vmn2r48;Vmn2r47	NM_001105151;NM_001105152
APP	chr7	12017348	12017623	276	12017465	10	9.64919	6.50965	5.25569	Intergenic	L1Md_A|LINE|L1		Zscan4f	NM_001110316
APP	chr7	12166547	12166746	200	12166649	8	6.88952	5.08983	2.88239	Intergenic	L1Md_T|LINE|L1		Vmn1r72	NM_145843
APP	chr7	13250590	13250916	327	13250771	12	9.45707	6.03991	5.0882	Exon	L1Md_F2|LINE|L1		Vmn2r55	NM_001104645
APP	chr7	13351259	13351458	200	13351296	7	5.51507	4.33591	1.90641	Intergenic	L1VL2|LINE|L1		Zfp110;Zscan18;Vmn2r56;Vmn2r55;Zfp329	NM_026046;NM_001104645;NM_001017955;NM_001104648;NM_022981
APP	chr7	13768443	13768654	212	13768577	8	7.28	5.32607	3.17509	Intergenic	L1Md_F|LINE|L1		Vmn1r85;Vmn1r87;Vmn1r86;Lig1;6330408A02Rik;Vmn1r89;Vmn1r88	NM_134227;NM_134226;NM_145847;NM_001167536;NM_001083188;NM_177312;NM_001167537;NM_001199310;NM_010715
APP	chr7	14674981	14675185	205	14675073	12	6.88037	4.45117	2.88239	Intron	L1Md_T|LINE|L1		Sult2a3	NM_001101586
APP	chr7	15429005	15429204	200	15429047	9	6.3968	4.64609	2.49375	Intergenic	L1Md_F|LINE|L1
APP	chr7	15647444	15647643	200	15647593	6	5.0922	4.1425	1.60528	Intergenic	Lx3A|LINE|L1
APP	chr7	15791551	15791764	214	15791704	13	10.5442	6.50452	6.0968	Intergenic	GA-rich|Low_complexity|Low_complexity
APP	chr7	16056603	16056802	200	16056705	8	5.95334	4.50292	2.23333	Intergenic	L1Md_A|LINE|L1		Obox1	NM_027802
APP	chr7	17683036	17683287	252	17683117	11	10.3617	6.78644	5.92478	Intron	A-rich|Low_complexity|Low_complexity		Psg16	NM_007676
APP	chr7	19038006	19038236	231	19038190	8	6.54678	4.8779	2.62118	Intergenic	L1Md_Gf|LINE|L1		Psg25;Psg26;Psg18;Psg28	NM_001163685;NM_001029893;NM_054060;NM_011963;NM_054063
APP	chr7	20760849	20761186	338	20761004	12	5.28664	3.52417	1.75791	Intergenic	(CA)n|Simple_repeat|Simple_repeat		Gm8653;Gm16451;Gm16442;Vmn1r91;Gm4498;Gm8453	NM_001167148;NM_001167149;NM_001167151;NM_001167150;NM_001167152;NM_001166736
APP	chr7	20784045	20784244	200	20784158	8	5.6934	4.33625	2.07152	Intergenic	L1_Mur2|LINE|L1		Gm8653;Gm16451;Gm16442;Vmn1r91;Gm4498;Gm8453	NM_001167148;NM_001167149;NM_001167151;NM_001167150;NM_001167152;NM_001166736
APP	chr7	20825627	20825834	208	20825738	9	5.91327	4.33652	2.20402	Intergenic	L1_Mus3|LINE|L1		Gm8653;Gm4498;Gm8453	NM_001167151;NM_001167150;NM_001167152
APP	chr7	20883165	20883376	212	20883216	10	5.24289	3.76637	1.72298	Intergenic	IAPLTR2b|LTR|ERVK		Gm8653;Gm4498;Gm8453	NM_001167151;NM_001167150;NM_001167152
APP	chr7	21012309	21012515	207	21012432	12	9.45707	6.03991	5.0882	Intergenic	L1Md_F3|LINE|L1		Vmn1r103	NM_001166737
APP	chr7	21014321	21014520	200	21014449	10	8.00362	5.50357	3.78597	Intergenic	L1_Mur2|LINE|L1		Vmn1r103	NM_001166737
APP	chr7	21035174	21035529	356	21035334	11	8.40176	5.5753	4.14211	Intergenic	L1Md_T|LINE|L1		Vmn1r104;Vmn1r103	NM_001166737;NM_001166738
APP	chr7	21244394	21244605	212	21244517	8	6.54678	4.8779	2.62118	Intergenic	L1Md_F2|LINE|L1		Gm8693;Vmn1r155	NM_001167154;NM_001166753
APP	chr7	21639170	21639414	245	21639231	12	7.9867	5.12524	3.78597	Intergenic	(CA)n|Simple_repeat|Simple_repeat		Vmn1r114;Vmn1r115;Vmn1r116;Vmn1r117;Vmn1r112;Vmn1r113	NM_001166716;NM_001166837;NM_001166744;NM_001166743;NM_001166847;NM_001166745
APP	chr7	21650101	21650300	200	21650119	9	6.3968	4.64609	2.49375	Intergenic	L1Md_F2|LINE|L1		Vmn1r114;Vmn1r115;Vmn1r116;Vmn1r117;Vmn1r112;Vmn1r113	NM_001166716;NM_001166837;NM_001166744;NM_001166743;NM_001166847;NM_001166745
APP	chr7	21664912	21665142	231	21665026	10	9.1658	6.2209	4.81433	Intergenic	B1_Mus1|SINE|Alu		Vmn1r114;Vmn1r115;Vmn1r116;Vmn1r117;Vmn1r113	NM_001166837;NM_001166744;NM_001166743;NM_001166745;NM_001166716
APP	chr7	21750832	21751031	200	21751007	9	5.69503	4.19671	2.07152	Intergenic	(TG)n|Simple_repeat|Simple_repeat		Vmn1r116;Vmn1r117;Vmn1r119;Vmn1r120	NM_001166708;NM_001166744;NM_001166743;NM_001166715
APP	chr7	21847963	21848239	277	21848094	11	8.40176	5.5753	4.14211	Intergenic	(CA)n|Simple_repeat|Simple_repeat		Vmn1r122;Vmn1r121;Vmn1r119;Vmn1r123;Vmn1r120	NM_001166707;NM_001166708;NM_001166714;NM_001166715;NM_001166741
APP	chr7	21927643	21927857	215	21927769	12	9.45707	6.03991	5.0882	Intergenic	L1Md_T|LINE|L1		Vmn1r121;Vmn1r120;Vmn1r123;Vmn1r122	NM_001166707;NM_001166714;NM_001166715;NM_001166741
APP	chr7	22011594	22011816	223	22011628	11	8.096	5.38316	3.86852	Intergenic	(TG)n|Simple_repeat|Simple_repeat		Vmn1r125;Vmn1r124;Vmn1r127;Vmn1r126;Vmn1r123;Vmn1r122	NM_001166707;NM_001166838;NM_001166757;NM_001166740;NM_001166714;NM_001166726
APP	chr7	22083486	22083685	200	22083615	7	6.16097	4.73429	2.31281	Intergenic	Intergenic		Vmn1r125;Vmn1r124;Vmn1r127;Vmn1r126;Vmn1r129;Vmn1r128	NM_001166838;NM_001166757;NM_001166740;NM_001166739;NM_001166725;NM_001166726
APP	chr7	22139514	22139737	224	22139645	12	11.4865	7.28864	6.99742	Intergenic	L1_Mur2|LINE|L1		Vmn1r125;Vmn1r124;Vmn1r127;Vmn1r126;Vmn1r129;Vmn1r128	NM_001166838;NM_001166757;NM_001166740;NM_001166739;NM_001166725;NM_001166726
APP	chr7	22320374	22320595	222	22320535	10	8.00362	5.50357	3.78597	Intergenic	MusHAL1|LINE|L1		Vmn1r139;Vmn1r137	NM_001166849;NM_001166748
APP	chr7	22590930	22591129	200	22591054	15	7.54143	4.33744	3.40163	Intergenic	(CA)n|Simple_repeat|Simple_repeat		Gm4177	NM_001167167
APP	chr7	22623279	22623508	230	22623406	13	8.94978	5.51949	4.62623	Intergenic	Intergenic		Gm4177;Gm5891;Gm10662	NM_001034904;NM_001167167;NM_001201364
APP	chr7	22862624	22862897	274	22862803	10	6.15787	4.33674	2.31281	Intergenic	(TG)n|Simple_repeat|Simple_repeat		Vmn1r142;Vmn1r93;Vmn1r132;Gm10666;Vmn1r94;Vmn1r107	NM_001122682;NM_001167573;NM_001166759;NM_001166749;NM_001166723;NM_207547
APP	chr7	22891290	22891515	226	22891317	7	4.55469	3.71687	1.33676	Intergenic	L1Md_F3|LINE|L1		Vmn1r143;Vmn1r142;Gm6164;Vmn1r132;Vmn1r93;Vmn1r94;Vmn1r95;Gm10666	NM_001122682;NM_001167573;NM_207547;NM_001166749;NM_001167538;NM_001166750;NM_001167153;NM_001166723
APP	chr7	23067945	23068307	363	23068191	14	9.94237	5.91374	5.53008	Intergenic	(TG)n|Simple_repeat|Simple_repeat		Vmn1r143;Gm4133;Gm5728;Vmn1r95;Vmn1r-ps79;Gm4187;Gm6164;Vmn1r118;Gm8660	NM_001166713;NM_001167538;NM_001166750;NM_001166742;NR_030707;NM_001167153;NM_001166751;NM_001167159;NM_001167158
APP	chr7	23539004	23539221	218	23539098	9	8.43465	5.91223	4.15533	Intergenic	MusHAL1|LINE|L1		Vmn1r158;Vmn1r159;Vmn1r130;Gm4567;Vmn1r157	NM_001166848;NM_001166754;NM_001037248;NM_001166758;NM_001166841
APP	chr7	23720798	23721027	230	23720933	11	10.3617	6.78644	5.92478	Intergenic	L1Md_T|LINE|L1		Vmn1r159;Gm4214;Gm4216;Gm4175;Vmn1r160	NM_001167164;NM_001167165;NM_001167166;NM_001166758;NM_001166724
APP	chr7	23725580	23725793	214	23725755	11	7.81062	5.20383	3.64028	Intergenic	(TG)n|Simple_repeat|Simple_repeat		Vmn1r159;Gm4214;Gm4216;Gm4175;Vmn1r160	NM_001167164;NM_001167165;NM_001167166;NM_001166758;NM_001166724
APP	chr7	23758281	23758567	287	23758480	8	7.27152	5.32101	3.17509	Intergenic	L1_Mur2|LINE|L1		Gm8720;Gm5725;Vmn1r135;Gm4216;Vmn1r163;Gm4214;Gm4175	NM_001166711;NM_001166747;NM_001166755;NM_001166756;NM_001167164;NM_001167165;NM_001167166
APP	chr7	23980017	23980216	200	23980068	11	10.3617	6.78644	5.92478	Intergenic	L1_Mm|LINE|L1		Gm4541;Vmn1r131;Vmn1r166;Vmn1r165;Vmn1r111;Gm6902	NM_001270494;NM_001166839;NM_001166746;NM_001166850;NM_001167168;NR_033693
APP	chr7	23981118	23981373	256	23981274	12	9.45707	6.03991	5.0882	Intergenic	(CA)n|Simple_repeat|Simple_repeat		Gm4541;Vmn1r131;Vmn1r166;Vmn1r165;Vmn1r111;Gm6902	NM_001270494;NM_001166839;NM_001166746;NM_001166850;NM_001167168;NR_033693
APP	chr7	24016720	24016989	270	24016816	7	5.81683	4.52429	2.11363	Intergenic	L1Md_F2|LINE|L1		Nlrp4e;Gm4541;Vmn1r131;Vmn1r166;Vmn1r165;Vmn1r111;Gm6902	NM_001270494;NM_001166839;NM_001004194;NM_001166746;NM_001166850;NM_001167168;NR_033693
APP	chr7	27069885	27070147	263	27070000	9	7.27567	5.20324	3.17509	Intergenic	L1Md_Gf|LINE|L1		Vmn1r184;Cyp2b9;Nlrp9c;Cyp2a4	NM_009997;NM_010000;NM_001042612;NM_001167540
APP	chr7	28855198	28855397	200	28855279	9	8.44414	5.91786	4.15533	Promoter	promoter-TSS (NM_001122603)		Fcgbp	NM_001122603
APP	chr7	32006815	32007014	200	32006951	10	6.84342	4.77017	2.88239	Intergenic	L1Md_F2|LINE|L1		Gm10640;Gramd1a;Scn1b;Scgb2b2;Scgb1b2	NR_046062;NM_020563;NM_011322;NM_027898;NM_207262
APP	chr7	33056393	33056690	298	33056519	13	12.971	7.98691	8.42889	Intergenic	L1Md_T|LINE|L1		Scgb2b12	NM_001281508
APP	chr7	33866299	33866562	264	33866430	8	7.28	5.32607	3.17509	Intergenic	RLTR10-int|LTR|ERVK		Scgb2b17	NM_001281524
APP	chr7	34869034	34869359	326	34869110	7	6.16097	4.73429	2.31281	Intergenic	L1Md_F2|LINE|L1		Uba2;Wtip;Scgb2b27;Scgb1b27;Scgb1b30	NM_207212;NM_009596;NM_016682;NM_001100464;NM_001099330;NM_001276475
APP	chr7	35201382	35201587	206	35201457	13	8.94978	5.51949	4.62623	Intergenic	Intergenic		Lsm14a	NM_025948
APP	chr7	36754442	36754663	222	36754587	9	6.3968	4.64609	2.49375	Intergenic	(TG)n|Simple_repeat|Simple_repeat
APP	chr7	36761124	36761323	200	36761165	8	6.88952	5.08983	2.88239	Intergenic	L1Md_A|LINE|L1
APP	chr7	48686162	48686392	231	48686282	7	5.81683	4.52429	2.11363	Intron	L1Md_T|LINE|L1		Vmn2r57	NM_177764
APP	chr7	49579320	49579745	426	49579590	11	9.47285	6.24389	5.10036	Intergenic	L1Md_F3|LINE|L1		Vmn2r61	NM_001105058
APP	chr7	49616762	49616961	200	49616885	10	9.1658	6.2209	4.81433	Intergenic	L1VL1|LINE|L1		Vmn2r61;4933421I07Rik;Vmn2r-ps60	NM_001105058;NM_027702;NR_028441
APP	chr7	53983825	53984024	200	53983905	9	8.00723	5.65536	3.78597	Exon	3' UTR (NM_011316, exon 4 of 4)		Saa4	NM_011316
APP	chr7	54434819	54435018	200	54434862	12	7.9867	5.12524	3.78597	Intergenic	L1Md_F2|LINE|L1		Mrgpra9;Mrgpra6;Ptpn5;Mir7056	NM_001288801;NM_001163565;NR_106023;NM_013643;NM_205821
APP	chr7	55506897	55507178	282	55507066	13	11.8079	7.28454	7.30434	Intergenic	L1Md_A|LINE|L1		Mrgprb5;Mrgprb4	NM_205795;NM_207538
APP	chr7	57312855	57313054	200	57312921	8	6.88952	5.08983	2.88239	Intron	L1Md_T|LINE|L1		Nell1	NM_001037906
APP	chr7	58198864	58199063	200	58198928	7	5.75391	4.48532	2.11363	Intergenic	L1Md_F2|LINE|L1		Nell1	NM_001037906
APP	chr7	60072461	60072685	225	60072618	11	9.08633	6.0039	4.75444	Intergenic	L1Md_T|LINE|L1
APP	chr7	61277775	61278264	490	61277881	8	5.45343	4.18148	1.87107	Intergenic	L1Md_T|LINE|L1
APP	chr7	61281475	61281687	213	61281640	7	6.16097	4.73429	2.31281	Intergenic	L1Md_T|LINE|L1
APP	chr7	62393946	62394163	218	62394038	8	5.95334	4.50292	2.23333	Intron	L1Md_T|LINE|L1		Luzp2	NM_178705
APP	chr7	66154372	66154606	235	66154446	11	8.096	5.38316	3.86852	Intergenic	L1Md_T|LINE|L1		Atp10a	NM_009728
APP	chr7	68258173	68258440	268	68258181	7	5.51507	4.33591	1.90641	Intergenic	(TTC)n|Simple_repeat|Simple_repeat
APP	chr7	68571570	68571769	200	68571620	7	6.16097	4.73429	2.31281	Intergenic	L1Md_F2|LINE|L1
APP	chr7	68716762	68717002	241	68716898	9	7.27567	5.20324	3.17509	Intron	L1Md_Gf|LINE|L1		B230209E15Rik	NR_045727
APP	chr7	70434391	70434609	219	70434562	7	6.16097	4.73429	2.31281	Intergenic	L1Md_F2|LINE|L1		Chrna7	NM_007390
APP	chr7	74420491	74420786	296	74420646	12	8.812	5.63748	4.49604	Intron	L1Md_T|LINE|L1		Mef2a	NM_001291195;NM_001033713;NM_001291196;NM_001291191;NM_001291192
APP	chr7	77828247	77828446	200	77828379	8	7.28	5.32607	3.17509	Intergenic	L1Md_T|LINE|L1
APP	chr7	79670604	79670809	206	79670733	9	8.43465	5.91223	4.15533	Intergenic	L1Md_A|LINE|L1
APP	chr7	81750467	81750695	229	81750637	9	5.29738	3.94249	1.75791	Intergenic	L1Md_A|LINE|L1		Slco3a1	NM_023908;NM_001038643
APP	chr7	81887978	81888177	200	81888111	11	7.81062	5.20383	3.64028	Intergenic	L1Md_T|LINE|L1
APP	chr7	81945572	81945788	217	81945765	7	6.15349	4.72978	2.31281	Intergenic	L1Md_T|LINE|L1
APP	chr7	83213532	83213793	262	83213641	7	6.16097	4.73429	2.31281	Intergenic	L1Md_A|LINE|L1
APP	chr7	83713255	83713518	264	83713329	8	6.88952	5.08983	2.88239	Intron	L1Md_T|LINE|L1		Agbl1	NM_001199224
APP	chr7	84619079	84619326	248	84619161	12	8.52006	5.45572	4.22619	Intergenic	L1Md_A|LINE|L1
APP	chr7	84670566	84670765	200	84670685	9	7.62344	5.41989	3.46838	Intergenic	L1Md_A|LINE|L1
APP	chr7	85023597	85023874	278	85023765	10	7.38071	5.1107	3.24811	Intergenic	L1Md_T|LINE|L1
APP	chr7	89618033	89618252	220	89618187	14	10.9078	6.50478	6.44166	Intron	L1Md_T|LINE|L1		Adamtsl3	NM_001190374
APP	chr7	93573732	93573997	266	93573847	7	6.16097	4.73429	2.31281	Intergenic	L1Md_A|LINE|L1		Olfr303;Olfr301;Olfr307;Olfr305;Olfr304;Olfr299;Olfr298	NM_001011751;NM_212436;NM_146619;NM_001011828;NM_146617;NM_146616;NM_001011767
APP	chr7	93718289	93718530	242	93718344	12	7.9867	5.12524	3.78597	Intergenic	L1Md_T|LINE|L1		Olfr295;Olfr294;Olfr297;Olfr298;Olfr293	NM_001011751;NM_146851;NM_001011752;NM_001011750;NM_146618
APP	chr7	93767218	93767522	305	93767361	10	8.74089	5.96188	4.42832	Promoter	L1Md_T|LINE|L1		Olfr294	NM_001011750
APP	chr7	94678746	94678945	200	94678840	8	7.28	5.32607	3.17509	Intergenic	(TTTC)n|Simple_repeat|Simple_repeat		Grm5;Tyr	NM_001143834;NM_001081414;NM_011661
APP	chr7	95210652	95210897	246	95210765	8	6.54678	4.8779	2.62118	Intron	L1Md_F2|LINE|L1		Grm5	NM_001143834;NM_001081414
APP	chr7	95521863	95522062	200	95521933	7	5.81683	4.52429	2.11363	Intergenic	L1Md_T|LINE|L1		Ctsc;Rab38	NM_028238;NM_009982
APP	chr7	96137361	96137563	203	96137430	7	6.16097	4.73429	2.31281	Intergenic	L1Md_T|LINE|L1
APP	chr7	96148960	96149191	232	96149068	8	7.28	5.32607	3.17509	Intergenic	L1Md_A|LINE|L1
APP	chr7	96843283	96843516	234	96843445	7	6.16097	4.73429	2.31281	Intron	L1Md_T|LINE|L1		Me3	NM_181407
APP	chr7	97677634	97677833	200	97677776	13	7.74751	4.79357	3.58134	Intergenic	L1Md_T|LINE|L1		Crebzf;Tmem126a;Tmem126b	NM_026734;NM_025460;NR_073438;NM_145151;NR_073437;NR_073436
APP	chr7	100445683	100445922	240	100445830	10	8.00362	5.50357	3.78597	Intergenic	L1Md_F2|LINE|L1
APP	chr7	104377739	104377938	200	104377849	14	7.61136	4.53899	3.46673	Intron	L1Md_T|LINE|L1		Gab2	NM_010248;NM_001162477
APP	chr7	109989753	109989952	200	109989940	9	5.29738	3.94249	1.75791	Intergenic	L1Md_A|LINE|L1		Olfr566;Olfr564;Olfr570;Olfr571;Olfr561;Olfr560;Olfr569;Olfr568;Olfr572;Olfr78	NM_147113;NM_147085;NM_147110;NM_147092;NM_147091;NM_147089;NM_147088;NM_130866;NM_001168503;NM_146359;NM_001011536
APP	chr7	110309521	110309819	299	110309676	6	5.0922	4.1425	1.60528	Intergenic	L1Md_A|LINE|L1		Olfr591;Olfr589;Olfr585;Olfr584;Olfr586;Olfr594;Olfr592;Usp17ld;Olfr593	NM_147087;NM_207556;NM_146380;NM_207143;NM_147111;NM_147052;NM_147054;NM_001011847;NM_001001559
APP	chr7	111181307	111181506	200	111181408	8	6.88952	5.08983	2.88239	Intergenic	L1Md_T|LINE|L1		Olfr635;Olfr633;Olfr632;Olfr639;Olfr638;Olfr642;Olfr643;Olfr640;Olfr641;Olfr646;Olfr644;Olfr645;4931431F19Rik	NM_147084;NM_027634;NM_146822;NM_147119;NM_147118;NM_147120;NM_147077;NM_207144;NM_147056;NM_146354;NM_147121;NM_147072;NM_146329
APP	chr7	111697150	111697382	233	111697222	8	7.28	5.32607	3.17509	Promoter	(TTTC)n|Simple_repeat|Simple_repeat		Olfr651	NM_146813
APP	chr7	111865923	111866122	200	111865965	7	5.51507	4.33591	1.90641	Intergenic	L1Md_T|LINE|L1		Olfr661;Olfr663;Olfr657;Olfr656;Usp17le;Olfr659;Olfr658	NM_001256973;NM_001011757;NM_146312;NM_147075;NM_146748;NM_147050;NM_147049
APP	chr7	113365338	113365537	200	113365393	7	5.81683	4.52429	2.11363	Intergenic	L1_Mus1|LINE|L1		Gm17757;Gm18853;Gvin1;Gm4070	NM_029000;NM_001243039;NR_040453;NR_040456
APP	chr7	115634416	115634805	390	115634681	8	6.88952	5.08983	2.88239	Intergenic	L1Md_A|LINE|L1		Olfr497;Olfr495;Olfr498;Olfr504;Olfr503;Olfr502	NM_146738;NM_146739;NM_146307;NM_146364;NM_001011858;NM_001011527
APP	chr7	117023550	117023770	221	117023728	11	10.3617	6.78644	5.92478	Intergenic	(GAAA)n|Simple_repeat|Simple_repeat		Scube2;Tmem41b;Dennd5a;Nrip3	NM_020610;NM_021494;NM_020052;NM_153525
APP	chr7	118115452	118115688	237	118115532	9	6.3968	4.64609	2.49375	Intron	(TG)n|Simple_repeat|Simple_repeat		Mrvi1	NM_194464
APP	chr7	119056925	119057124	200	119057029	8	7.28	5.32607	3.17509	Intergenic	L1Md_T|LINE|L1
APP	chr7	122982009	122982208	200	122982127	13	6.79314	4.23639	2.84948	Intron	GA-rich|Low_complexity|Low_complexity		Sox6	NM_001025559;NM_001277326;NM_011445;NM_001025560
APP	chr7	125618009	125618208	200	125618126	13	6.00973	3.79526	2.28483	Intergenic	(TCTCTG)n|Simple_repeat|Simple_repeat		Coq7;Tmc7;Itpripl2;Syt17	NM_009940;NM_001033380;NM_138649;NM_172476
APP	chr7	126197768	126198025	258	126197857	13	8.94978	5.51949	4.62623	Intergenic	L1Md_A|LINE|L1		Iqck;Gpr139;Gprc5b	NM_001195774;NM_022420;NM_001081446;NM_001024138
APP	chr7	126582705	126582904	200	126582836	10	7.38071	5.1107	3.24811	Intergenic	L1Md_T|LINE|L1		Pdilt;Umod;Acsm5;Gp2	NM_027943;NM_178758;NM_009470;NM_025989;NM_001278605
APP	chr7	126649042	126649323	282	126649127	8	5.45343	4.18148	1.87107	Intron	L1Md_T|LINE|L1		Pdilt	NM_027943
APP	chr7	127403932	127404168	237	127404018	6	5.0922	4.1425	1.60528	Intron	L1Md_F2|LINE|L1		Abca14	NM_026458
APP	chr7	130165782	130165983	202	130165812	9	8.00723	5.65536	3.78597	Intergenic	polypurine|Low_complexity|Low_complexity		Rbbp6;4930413G21Rik	NR_045614;NM_011247;NM_175023
APP	chr7	131956263	131956487	225	131956425	8	5.95334	4.50292	2.23333	Intergenic	L1Md_T|LINE|L1
APP	chr7	132080768	132081046	279	132080965	10	6.15787	4.33674	2.31281	Intergenic	(CA)n|Simple_repeat|Simple_repeat
APP	chr7	132096508	132096813	306	132096744	7	5.51507	4.33591	1.90641	Intergenic	(GAAA)n|Simple_repeat|Simple_repeat
APP	chr7	132157251	132157450	200	132157325	8	7.28	5.32607	3.17509	Intergenic	L1Md_T|LINE|L1
APP	chr7	133214468	133214711	244	133214551	10	9.1658	6.2209	4.81433	Intron	(CA)n|Simple_repeat|Simple_repeat		Gsg1l	NM_001101488
APP	chr7	133462656	133462855	200	133462735	11	10.8917	7.10143	6.42636	Intergenic	(TATATG)n|Simple_repeat|Simple_repeat		Mir7058;Spns1;Nfatc2ip;Lat;Sbk1;Cd19	NM_145587;NM_010900;NM_010689;NR_045537;NM_023712;NM_009844;NR_106025
APP	chr7	134069167	134069440	274	134069279	10	5.24289	3.76637	1.72298	Promoter	(TG)n|Simple_repeat|Simple_repeat		Kctd13	NM_172747
APP	chr7	138521611	138521810	200	138521762	8	6.88952	5.08983	2.88239	Intron	L1Md_T|LINE|L1		Pstk	NM_001039534
APP	chr7	141734595	141734805	211	141734731	10	9.64919	6.50965	5.25569	Intergenic	(CCAA)n|Simple_repeat|Simple_repeat
APP	chr7	145265659	145265858	200	145265759	10	7.38071	5.1107	3.24811	Intergenic	(TG)n|Simple_repeat|Simple_repeat
APP	chr7	145828702	145828906	205	145828791	11	8.096	5.38316	3.86852	Intergenic	L1Md_F|LINE|L1
APP	chr7	147655487	147655686	200	147655544	8	5.45343	4.18148	1.87107	Intergenic	L1Md_F|LINE|L1		Olfr530;Olfr531;Olfr532;Olfr533;Olfr535;Olfr536	NM_146954;NM_146520;NM_146953;NM_001011815;NM_146519;NM_147026
APP	chr7	147657046	147657245	200	147657178	9	8.00723	5.65536	3.78597	Intergenic	L1Md_F|LINE|L1		Olfr530;Olfr531;Olfr532;Olfr533;Olfr535;Olfr536	NM_146954;NM_146520;NM_146953;NM_001011815;NM_146519;NM_147026
APP	chr7	147977621	147977820	200	147977671	7	6.16097	4.73429	2.31281	Promoter	(TG)n|Simple_repeat|Simple_repeat		Syce1	NM_001143765
APP	chr7	148838843	148839042	200	148838978	13	6.62457	4.14015	2.69491	Intron	(TG)n|Simple_repeat|Simple_repeat		Muc6	NM_181729
APP	chr8	3773899	3774159	261	3774055	9	8.00723	5.65536	3.78597	Intergenic	MERVL-int|LTR|ERVL		Fcer2a;Clec4g;Trappc5;Rprl3;Cd209a;Cd209d;Cd209e	NM_013517;NM_025701;NM_001253747;NM_001253745;NM_001253743;NM_001253746;NR_024198;NM_130905;NM_029465;NM_001253739;NM_133238;NM_001253737;NM_130904
APP	chr8	5585484	5585781	298	5585672	8	7.28	5.32607	3.17509	Intergenic	L1_Mm|LINE|L1
APP	chr8	6681394	6681694	301	6681563	11	9.47285	6.24389	5.10036	Intergenic	L1Md_F2|LINE|L1
APP	chr8	7264766	7265017	252	7264895	8	7.28	5.32607	3.17509	Intergenic	MERVL-int|LTR|ERVL
APP	chr8	7659233	7659432	200	7659351	7	6.16097	4.73429	2.31281	Intergenic	L1Md_F2|LINE|L1
APP	chr8	9356243	9356480	238	9356336	10	9.63869	6.50345	5.25524	Intron	L1Md_T|LINE|L1		Fam155a	NM_173446
APP	chr8	9509747	9510094	348	9509841	8	7.28	5.32607	3.17509	Intron	L1Md_A|LINE|L1		Fam155a	NM_173446
APP	chr8	9842090	9842289	200	9842208	6	5.0922	4.1425	1.60528	Intergenic	L1Md_F3|LINE|L1		Fam155a	NM_173446
APP	chr8	9842417	9842616	200	9842500	7	5.81683	4.52429	2.11363	Intergenic	L1Md_F3|LINE|L1		Fam155a	NM_173446
APP	chr8	14036589	14036792	204	14036655	7	5.81683	4.52429	2.11363	Intron	(CA)n|Simple_repeat|Simple_repeat		Erich1	NM_001034862
APP	chr8	15091592	15091868	277	15091695	8	7.28	5.32607	3.17509	Intron	L1Md_A|LINE|L1		Myom2	NM_008664
APP	chr8	15654035	15654242	208	15654195	9	6.3968	4.64609	2.49375	Intergenic	L1Md_T|LINE|L1
APP	chr8	16364450	16364649	200	16364507	7	6.15349	4.72978	2.31281	Intron	L1Md_T|LINE|L1		Csmd1	NM_053171
APP	chr8	19042929	19043161	233	19043008	12	7.9867	5.12524	3.78597	Intergenic	L1Md_T|LINE|L1		Xkr5;Spag11b;Defb37;Defb34;Defb40;Defb38;Defb39;Defb12	NM_001034905;NM_001286493;NM_001286469;NM_176951;NM_001113350;NM_152802;NM_183035;NM_183036;NM_001039563;NM_183038;NM_183039;NM_181683
APP	chr8	19176773	19176972	200	19176896	8	5.45343	4.18148	1.87107	Intergenic	L1Md_T|LINE|L1		Spag11b;Defb6;Spag11a;Defa-ps12;Defb4;Defb5;Defb46;Defb34;Defb14;Defb12	NM_001034905;NM_001286493;NM_001025351;NM_019728;NM_152802;NM_153115;NM_183035;NM_183026;NM_001039563;NR_002878;NM_030734;NM_054074
APP	chr8	19394781	19395019	239	19394905	8	7.28	5.32607	3.17509	Intergenic	RLTR10|LTR|ERVK		Defb3;Defb8;Defa-ps13	NM_153108;NM_013756;NR_002881
APP	chr8	19941311	19941941	631	19941487	23	7.92936	3.54938	3.75406	Intron	L1VL4|LINE|L1		Gm15319	NM_001177408
APP	chr8	19966532	19966744	213	19966694	17	5.74399	3.2089	2.11363	Intergenic	L1VL4|LINE|L1		Gm15319;2610005L07Rik;6820431F20Rik	NM_001177408;NR_030708;NR_028428
APP	chr8	19971798	19972215	418	19971959	22	12.1542	5.49167	7.63944	Intergenic	L1VL1|LINE|L1		Gm15319;2610005L07Rik;6820431F20Rik	NM_001177408;NR_030708;NR_028428
APP	chr8	22830326	22830525	200	22830496	7	6.16097	4.73429	2.31281	Intergenic	L1Md_F2|LINE|L1		Defa24;Defa17;Defb1;Gm15315;AY761184;Defa6;Defa4;Defa-ps1	NR_003146;NM_001007582;NM_010039;NM_001167790;NM_001024225;NM_001177528;NM_007843;NM_007852
APP	chr8	23098532	23098823	292	23098673	9	8.44414	5.91786	4.15533	Intergenic	L1Md_Gf|LINE|L1		Alg11;Nek5;C86695;Ccdc70;Defb35;Defb15;Atp7b;Defb11;Defb13	NM_177898;NM_001243161;NM_026459;NM_139221;NM_139222;NM_139223;NM_139224;NR_040650;NM_007511;NM_183142;NM_001081662
APP	chr8	23405173	23405460	288	23405265	8	6.23645	4.68292	2.37084	Intron	L1Md_A|LINE|L1		Tpte	NM_199257
APP	chr8	27696225	27696424	200	27696250	8	5.45343	4.18148	1.87107	Intergenic	L1Md_T|LINE|L1
APP	chr8	28431084	28431315	232	28431182	7	6.16097	4.73429	2.31281	Intergenic	L1Md_T|LINE|L1		Gm9731;Tex24;Chrna6;Adrb3;Eif4ebp1;Chrnb3	NM_173212;NM_007918;NM_001013609;NM_021369;NR_003107;NM_027454;NM_013462
APP	chr8	29139911	29140110	200	29140003	8	7.28	5.32607	3.17509	Intergenic	L1Md_A|LINE|L1		Gm8096	NR_033590
APP	chr8	29140873	29141072	200	29140995	10	7.38071	5.1107	3.24811	Intergenic	L1Md_A|LINE|L1		Gm8096	NR_033590
APP	chr8	30626614	30626813	200	30626791	6	5.0922	4.1425	1.60528	Intergenic	IAPEz-int|LTR|ERVK
APP	chr8	30735306	30735514	209	30735377	7	6.16097	4.73429	2.31281	Intergenic	L1Md_A|LINE|L1
APP	chr8	30735592	30735868	277	30735775	9	8.00723	5.65536	3.78597	Intergenic	L1Md_A|LINE|L1
APP	chr8	32159218	32159590	373	32159493	7	6.15349	4.72978	2.31281	Intergenic	L1Md_F2|LINE|L1		Rnf122;Dusp26	NM_025869;NM_175136
APP	chr8	34334896	34335203	308	34335070	11	8.40176	5.5753	4.14211	Intergenic	L1Md_T|LINE|L1		Wrn	NM_001122822;NM_011721
APP	chr8	35965596	35965795	200	35965684	9	8.00723	5.65536	3.78597	Intron	Lx9|LINE|L1		Tnks	NM_175091
APP	chr8	36946902	36947101	200	36947014	8	5.45343	4.18148	1.87107	Promoter	promoter-TSS (NR_046181)		5430403N17Rik	NR_046181
APP	chr8	37306142	37306347	206	37306174	18	8.26952	4.26291	4.03405	Intron	MTA_Mm|LTR|MaLR		Lonrf1	NM_001081150
APP	chr8	38728386	38728585	200	38728470	9	7.62344	5.41989	3.46838	Intron	L1Md_A|LINE|L1		Sgcz	NM_145841
APP	chr8	39140610	39140833	224	39140699	8	7.28	5.32607	3.17509	Intron	GA-rich|Low_complexity|Low_complexity		Sgcz	NM_145841
APP	chr8	39884009	39884391	383	39884247	14	11.6609	6.96913	7.16209	Intergenic	L1Md_T|LINE|L1
APP	chr8	40280693	40280922	230	40280806	10	9.64919	6.50965	5.25569	Intergenic	L1Md_F|LINE|L1		Tusc3	NM_030254
APP	chr8	40606561	40606760	200	40606741	6	5.0922	4.1425	1.60528	Intergenic	L1Md_F2|LINE|L1		Msr1	NM_031195;NM_001113326
APP	chr8	41159901	41160110	210	41160033	8	6.88952	5.08983	2.88239	Intergenic	L1Md_F2|LINE|L1
APP	chr8	41287303	41287503	201	41287408	7	6.15349	4.72978	2.31281	Intergenic	L1Md_A|LINE|L1		Fgf20	NM_030610
APP	chr8	42814775	42815011	237	42814822	8	6.88952	5.08983	2.88239	Intergenic	L1Md_A|LINE|L1		2810404M03Rik	NR_045497
APP	chr8	45246008	45246207	200	45246152	6	5.08572	4.13856	1.60528	Intergenic	L1Md_F3|LINE|L1
APP	chr8	47566601	47566854	254	47566808	12	4.17217	2.91673	1.07479	Intron	(TG)n|Simple_repeat|Simple_repeat		Acsl1	NM_007981
APP	chr8	50164317	50164516	200	50164474	8	7.28	5.32607	3.17509	Intergenic	L1Md_A|LINE|L1
APP	chr8	51185546	51185745	200	51185665	6	5.0922	4.1425	1.60528	Intergenic	L1Md_T|LINE|L1
APP	chr8	54199877	54200118	242	54199934	11	10.8917	7.10143	6.42636	Intergenic	L1Md_T|LINE|L1
APP	chr8	55702946	55703145	200	55703050	8	7.27152	5.32101	3.17509	Intergenic	L1Md_F3|LINE|L1		Wdr17;Asb5;Spata4;Spcs3	NM_029569;NM_001172152;NM_029701;NM_028220;NM_133711
APP	chr8	55703652	55703977	326	55703814	13	5.35136	3.43733	1.8104	Intergenic	L1Md_F3|LINE|L1		Wdr17;Asb5;Spata4;Spcs3	NM_029569;NM_001172152;NM_029701;NM_028220;NM_133711
APP	chr8	55954716	55954928	213	55954781	9	6.66638	4.81806	2.73012	Intron	L1Md_A|LINE|L1		Gpm6a	NM_001253754
APP	chr8	56200278	56200499	222	56200298	55	7.41123	2.18892	3.27784	Intergenic	(GA)n|Simple_repeat|Simple_repeat		Gpm6a	NM_153581;NM_001253754;NM_001253756
APP	chr8	58058160	58058396	237	58058335	7	6.08301	4.68721	2.31281	Intergenic	L1Md_F2|LINE|L1
APP	chr8	58830845	58831087	243	58830968	8	7.28	5.32607	3.17509	Intergenic	L1Md_A|LINE|L1		Hpgd	NM_008278
APP	chr8	61206219	61206420	202	61206367	9	7.27567	5.20324	3.17509	Intron	L1Md_A|LINE|L1		Galntl6	NM_175032
APP	chr8	61457018	61457221	204	61457152	11	9.89567	6.50387	5.48726	Intergenic	L1Md_T|LINE|L1		Galntl6;BC030500	NM_173411;NM_175032
APP	chr8	62130652	62130949	298	62130841	7	5.81683	4.52429	2.11363	Intergenic	L1Md_T|LINE|L1
APP	chr8	62582271	62582486	216	62582428	9	6.3968	4.64609	2.49375	Intergenic	L1Md_T|LINE|L1
APP	chr8	62762161	62762372	212	62762220	10	6.15787	4.33674	2.31281	Intergenic	L1Md_A|LINE|L1
APP	chr8	62837933	62838179	247	62838092	7	5.81683	4.52429	2.11363	Intergenic	L1Md_T|LINE|L1
APP	chr8	64370372	64370571	200	64370471	8	6.88952	5.08983	2.88239	Intron	L1Md_F2|LINE|L1		Palld	NM_001081390;NM_001293772
APP	chr8	65552990	65553240	251	65553154	8	7.28	5.32607	3.17509	Intron	L1Md_T|LINE|L1		Spock3	NM_001252620;NM_001252621;NM_023689
APP	chr8	66771328	66771527	200	66771496	8	5.45343	4.18148	1.87107	Intergenic	L1Md_T|LINE|L1		Tll1	NM_009390
APP	chr8	67415931	67416226	296	67416077	12	7.9867	5.12524	3.78597	Intergenic	L1Md_T|LINE|L1		Tmem192;Klhl2;Trim75	NM_001163747;NM_028427;NM_001033429;NM_178633
APP	chr8	67844805	67845068	264	67844978	9	8.00723	5.65536	3.78597	Intergenic	L1Md_T|LINE|L1
APP	chr8	68028572	68028771	200	68028596	9	6.3968	4.64609	2.49375	Intergenic	L1Md_T|LINE|L1
APP	chr8	69561844	69562119	276	69561940	11	7.29205	4.87876	3.18645	Intergenic	L1Md_T|LINE|L1
APP	chr8	69651446	69651824	379	69651503	10	6.15787	4.33674	2.31281	Intergenic	L1Md_T|LINE|L1
APP	chr8	69711685	69711977	293	69711810	11	10.8802	7.09468	6.41806	Intergenic	L1Md_A|LINE|L1
APP	chr8	69882117	69882376	260	69882234	9	5.91327	4.33652	2.20402	Intergenic	L1Md_A|LINE|L1
APP	chr8	71025177	71025446	270	71025303	10	9.1658	6.2209	4.81433	Intron	L1Md_A|LINE|L1		Csgalnact1	NM_001252623;NM_172753
APP	chr8	71985151	71985350	200	71985277	17	7.52483	4.03855	3.38638	Intergenic	L1VL4|LINE|L1		Gm10033	NR_038043;NR_038044
APP	chr8	72506810	72507009	200	72506938	7	5.51507	4.33591	1.90641	Intron	(GAA)n|Simple_repeat|Simple_repeat		Gatad2a	NM_145596;NM_001286450
APP	chr8	75493258	75493457	200	75493366	11	8.40176	5.5753	4.14211	Intron	L1Md_T|LINE|L1		Large	NM_010687
APP	chr8	78835267	78835473	207	78835284	8	5.45343	4.18148	1.87107	Intergenic	RLTR10|LTR|ERVK
APP	chr8	78858952	78859260	309	78859086	10	6.15787	4.33674	2.31281	Intergenic	L1Md_T|LINE|L1
APP	chr8	79917837	79918059	223	79917934	9	6.3968	4.64609	2.49375	Intron	L1Md_T|LINE|L1		Arhgap10	NM_030113
APP	chr8	82019940	82020139	200	82020081	9	6.3968	4.64609	2.49375	Intergenic	(CA)n|Simple_repeat|Simple_repeat		Smad1	NM_008539
APP	chr8	82347227	82347465	239	82347277	10	7.38071	5.1107	3.24811	Intergenic	L1Md_F2|LINE|L1		Anapc10	NM_026904
APP	chr8	82654076	82654436	361	82654268	9	8.44414	5.91786	4.15533	Intergenic	L1_Mus3|LINE|L1		Hhip	NM_020259
APP	chr8	82936188	82936387	200	82936226	8	6.54678	4.8779	2.62118	Intergenic	L1Md_T|LINE|L1		Gypa	NM_010369
APP	chr8	84482787	84483113	327	84483042	6	5.0922	4.1425	1.60528	Intron	L1Md_T|LINE|L1		Inpp4b	NM_001297593;NM_001297591;NM_001297596;NM_001024617
APP	chr8	85241927	85242126	200	85242011	9	8.00723	5.65536	3.78597	Intergenic	L1Md_T|LINE|L1		Zfp330	NM_145600
APP	chr8	85797767	85798035	269	85797858	8	7.28	5.32607	3.17509	Intergenic	Lx9|LINE|L1		Tbc1d9;Elmod2;Mgat4d;Ucp1	NM_026233;NM_001170691;NM_001111304;NM_027758;NM_009463;NM_178736
APP	chr8	86280629	86281017	389	86280841	89	11.1382	2.1979	6.6624	Intergenic	(CCCTAA)n|Simple_repeat|Simple_repeat		Ddx39;Pkn1;Cd97;Ptger1;Gipc1;Mir1668	NM_011925;NM_018771;NR_106188;NM_197982;NM_177262;NM_001199593;NM_013641;NM_001163030;NM_001163031;NM_001163029
APP	chr8	86314579	86314783	205	86314744	11	6.0447	4.10877	2.31281	Intergenic	HAL1-3A_ME|LINE|L1		Pkn1;Cd97;Mir1668;Ddx39	NM_197982;NR_106188;NM_001163031;NM_177262;NM_001199593;NM_001163030;NM_011925;NM_001163029
APP	chr8	87762192	87762391	200	87762212	11	7.05526	4.73099	3.02535	Intergenic	L1Md_F2|LINE|L1		Orc6;Mylk3;Vps35;Cks1brt;Olfr371	NR_028268;NM_001297612;NM_175441;NM_022997;NM_019716;NM_001163791;NM_001037922;NM_146859
APP	chr8	87871820	87872028	209	87871870	8	7.27152	5.32101	3.17509	Intron	L1Md_A|LINE|L1		Mylk3	NM_175441;NM_001297612
APP	chr8	88900994	88901193	200	88901038	10	7.38071	5.1107	3.24811	Intergenic	L1Md_T|LINE|L1
APP	chr8	89551656	89551998	343	89551802	11	8.40176	5.5753	4.14211	Intergenic	Intergenic
APP	chr8	92739948	92740161	214	92740021	8	7.28	5.32607	3.17509	Intergenic	L1Md_A|LINE|L1		Tox3	NM_172913
APP	chr8	96437935	96438134	200	96437994	9	8.00723	5.65536	3.78597	Intron	intron (NM_010308, intron 3 of 8)		Gnao1	NM_010308;NM_001113384
APP	chr8	96988964	96989163	200	96989023	7	6.15349	4.72978	2.31281	Intergenic	L1Md_F2|LINE|L1		Herpud1;Mir7072;Cpne2;9330175E14Rik;Slc12a3;Nlrc5	NM_019415;NR_015514;NM_153507;NR_106040;NM_022331;NM_001205311;NM_001033207
APP	chr8	98203507	98203744	238	98203617	10	9.64919	6.50965	5.25569	Intergenic	(TG)n|Simple_repeat|Simple_repeat		Mir7073;Gins3;Cnot1;Ndrg4;Setd6	NM_145602;NR_106041;NM_001195006;NM_001205226;NM_178078;NM_030198;NM_001035123;NM_153164
APP	chr8	98787302	98787501	200	98787352	7	6.15349	4.72978	2.31281	Intergenic	L1Md_F3|LINE|L1
APP	chr8	99462597	99462859	263	99462707	7	6.16097	4.73429	2.31281	Intergenic	L1Md_T|LINE|L1
APP	chr8	100074352	100074853	502	100074658	9	8.44414	5.91786	4.15533	Intergenic	L1Md_T|LINE|L1
APP	chr8	103902873	103903130	258	103902971	9	6.95815	5.00325	2.94082	Intergenic	L1Md_A|LINE|L1
APP	chr8	104771058	104771277	220	104771117	8	6.88952	5.08983	2.88239	Intergenic	L1Md_A|LINE|L1
APP	chr8	107347578	107347971	394	107347715	12	7.9867	5.12524	3.78597	Intergenic	L1Md_T|LINE|L1		Ces2a;Ces2b;4932416K20Rik;Ces2c;Ces2d-ps	NM_145603;NM_133960;NR_033726;NM_198171;NM_001002775;NM_001190330
APP	chr8	115319427	115319806	380	115319612	10	9.1658	6.2209	4.81433	Intron	L1Md_T|LINE|L1		Cntnap4	NM_130457
APP	chr8	116406255	116406454	200	116406303	6	5.0922	4.1425	1.60528	Intergenic	GA-rich|Low_complexity|Low_complexity		Adamts18	NM_172466
APP	chr8	120503920	120504119	200	120504082	9	8.00723	5.65536	3.78597	Intergenic	L1Md_T|LINE|L1
APP	chr8	125470246	125470445	200	125470279	7	6.16097	4.73429	2.31281	Intron	intron (NM_001081379, intron 2 of 12)		Ankrd11	NR_037865;NM_001081379
APP	chr8	126111261	126111474	214	126111399	9	7.77226	5.51169	3.60491	Intergenic	Intergenic		Afg3l1;Gas8;Dbndd1;Rhou	NM_133955;NR_028260;NM_001170976;NM_001170975;NM_018855;NM_028146;NM_054070
APP	chr8	126131572	126131781	210	126131686	10	6.15787	4.33674	2.31281	Intergenic	Intergenic		Gas8;Dbndd1;Rhou	NM_018855;NM_001170976;NM_028146;NM_001170975;NM_133955
APP	chr8	130424010	130424267	258	130424130	10	6.15787	4.33674	2.31281	Intergenic	L1Md_T|LINE|L1
APP	chr8	131614839	131615038	200	131614922	7	6.16097	4.73429	2.31281	Intron	L1Md_F2|LINE|L1		1700008F21Rik	NM_001168369;NM_029292
APP	chr9	4183975	4184174	200	4184135	8	6.88952	5.08983	2.88239	Intergenic	L1Md_T|LINE|L1
APP	chr9	5075332	5075642	311	5075444	12	11.5921	7.35197	7.09652	Intergenic	L1Md_F2|LINE|L1
APP	chr9	5362285	5362510	226	5362320	7	6.16097	4.73429	2.31281	Intron	L1Md_T|LINE|L1		Casp12	NM_009808
APP	chr9	6444135	6444365	231	6444314	8	6.23645	4.68292	2.37084	Intergenic	L1Md_A|LINE|L1		Pdgfd	NM_027924
APP	chr9	6629740	6629939	200	6629762	6	5.0922	4.1425	1.60528	Intergenic	L1Md_F|LINE|L1
APP	chr9	8318734	8318933	200	8318814	8	7.27152	5.32101	3.17509	Intergenic	L1Md_A|LINE|L1		Mir1899;1700128F08Rik	NR_033618;NR_035437
APP	chr9	8359357	8359570	214	8359470	12	11.0848	7.04586	6.61119	Intergenic	L1Md_T|LINE|L1
APP	chr9	8410446	8410651	206	8410510	8	6.88952	5.08983	2.88239	Intergenic	L1Md_T|LINE|L1
APP	chr9	8469643	8469886	244	8469741	12	7.9867	5.12524	3.78597	Intergenic	L1Md_T|LINE|L1		Trpc6	NM_013838;NM_001282087;NM_001282086
APP	chr9	8664129	8664397	269	8664210	8	7.28	5.32607	3.17509	Intron	L1Md_A|LINE|L1		Trpc6;LOC102634431	NR_110513;NM_013838;NM_001282086
APP	chr9	9469865	9470107	243	9469909	10	4.52246	3.3286	1.33676	Intergenic	L1Md_T|LINE|L1
APP	chr9	11113325	11113524	200	11113464	9	5.29738	3.94249	1.75791	Intergenic	L1Md_T|LINE|L1
APP	chr9	12807075	12807275	201	12807201	9	6.66638	4.81806	2.73012	Intergenic	L1Md_T|LINE|L1
APP	chr9	12849974	12850193	220	12850047	8	7.28	5.32607	3.17509	Intergenic	L1Md_T|LINE|L1
APP	chr9	12850652	12850851	200	12850690	8	6.88952	5.08983	2.88239	Intergenic	L1Md_T|LINE|L1
APP	chr9	17441160	17441415	256	17441288	9	8.00723	5.65536	3.78597	Intergenic	L1Md_F2|LINE|L1
APP	chr9	17659504	17659703	200	17659583	8	6.23645	4.68292	2.37084	Intergenic	L1Md_A|LINE|L1
APP	chr9	17891590	17891812	223	17891771	9	6.3968	4.64609	2.49375	Intergenic	L1Md_T|LINE|L1
APP	chr9	20796107	20796313	207	20796219	9	8.00723	5.65536	3.78597	Intergenic	(CA)n|Simple_repeat|Simple_repeat		Mir7081;Mir1900;Mir7082;Ppan;Dnmt1;Icam5;Eif3g;Mrpl4;Icam4;Fdx1l;Icam1;S1pr2;Raver1-fdx1l;Raver1;Zglp1	NR_035438;NR_106049;NM_145610;NM_001199433;NM_001199432;NM_001199431;NR_106050;NM_001103168;NM_010493;NM_016876;NM_010066;NM_010333;NM_008319;NM_001039824;NR_038081;NM_027911;NM_023167;NM_023892
APP	chr9	22535075	22535322	248	22535180	8	6.88952	5.08983	2.88239	Intron	L1Md_T|LINE|L1		Bbs9	NM_181316;NM_178415
APP	chr9	22706536	22706735	200	22706636	13	10.5442	6.50452	6.0968	Intergenic	L1Md_A|LINE|L1		Bbs9	NM_181316;NM_178415
APP	chr9	24073081	24073280	200	24073210	7	5.66201	4.4281	2.04828	Intron	L1Md_T|LINE|L1		Npsr1	NM_175678
APP	chr9	25564672	25564871	200	25564831	8	6.54678	4.8779	2.62118	Intergenic	L1Md_T|LINE|L1
APP	chr9	25778693	25778892	200	25778814	8	5.45343	4.18148	1.87107	Intergenic	L1Md_A|LINE|L1
APP	chr9	26211286	26211485	200	26211355	7	6.16097	4.73429	2.31281	Intergenic	L1Md_T|LINE|L1
APP	chr9	30871119	30871362	244	30871212	7	6.16097	4.73429	2.31281	Intron	intron (NM_172765, intron 3 of 5)		Zbtb44	NM_172765;NM_001115130
APP	chr9	31543097	31543307	211	31543195	12	9.45707	6.03991	5.0882	Intergenic	L1Md_A|LINE|L1
APP	chr9	31579746	31579945	200	31579819	10	7.38071	5.1107	3.24811	Intergenic	(TTTTC)n|Simple_repeat|Simple_repeat		Barx2	NM_013800
APP	chr9	32123145	32123344	200	32123218	8	7.28	5.32607	3.17509	Exon	3' UTR (NM_010605, exon 4 of 4)		Kcnj5	NM_010605
APP	chr9	32850574	32850785	212	32850707	8	7.28	5.32607	3.17509	Intergenic	L1Md_A|LINE|L1
APP	chr9	37693831	37694051	221	37693972	13	8.94978	5.51949	4.62623	Intergenic	L1Md_F2|LINE|L1		Olfr145;Olfr878;Olfr877;Olfr876	NM_146798;NM_146883;NM_146417;NM_146313
APP	chr9	42827090	42827317	228	42827193	9	6.14655	4.48597	2.31281	Intron	(TCCA)n|Simple_repeat|Simple_repeat		Arhgef12	NM_027144
APP	chr9	45748398	45748651	254	45748470	9	8.44414	5.91786	4.15533	Promoter	(CTCG)n|Simple_repeat|Simple_repeat		Mir7087;Tagln	NM_011526;NR_106055
APP	chr9	48944331	48944670	340	48944447	11	10.8917	7.10143	6.42636	Intergenic	L1Md_F2|LINE|L1		Zw10;Tmprss5;Usp28	NM_012039;NM_030709;NM_175482
APP	chr9	51377252	51377457	206	51377271	11	8.40176	5.5753	4.14211	Intergenic	L1Md_T|LINE|L1
APP	chr9	53457607	53458025	419	53457871	13	12.8544	7.91751	8.31498	Intron	intron (NM_001161618, intron 3 of 17)		Cul5	NM_027807;NM_001161618
APP	chr9	54891158	54891392	235	54891255	10	9.1658	6.2209	4.81433	Intron	GA-rich|Low_complexity|Low_complexity		Chrnb4	NM_148944
APP	chr9	55622834	55623050	217	55622939	10	8.35562	5.72357	4.11055	Intron	L1Md_A|LINE|L1		Scaper	NM_001081341
APP	chr9	55677583	55677789	207	55677629	8	7.28	5.32607	3.17509	Intron	L1Md_T|LINE|L1		Scaper	NM_001081341
APP	chr9	55677929	55678181	253	55678081	6	5.0922	4.1425	1.60528	Intron	L1Md_T|LINE|L1		Scaper	NM_001081341
APP	chr9	57137142	57137343	202	57137170	8	7.28	5.32607	3.17509	Intergenic	Intergenic		Trcg1;1700017B05Rik	NM_001014398;NM_028820
APP	chr9	65790093	65790318	226	65790163	8	6.88952	5.08983	2.88239	Intron	L1Md_A|LINE|L1		Csnk1g1	NM_173185
APP	chr9	67827913	67828112	200	67828031	9	7.27567	5.20324	3.17509	Intron	L1Md_A|LINE|L1		Vps13c	NM_177184
APP	chr9	68838061	68838296	236	68838135	11	8.40176	5.5753	4.14211	Intron	CT-rich|Low_complexity|Low_complexity		Rora	NM_013646
APP	chr9	70899706	70899905	200	70899840	7	6.16097	4.73429	2.31281	Intergenic	L1Md_F2|LINE|L1		Aqp9	NR_073483;NM_001271843;NM_022026
APP	chr9	71041928	71042477	550	71042363	9	7.62344	5.41989	3.46838	Intron	L1Md_T|LINE|L1		LOC102635087	NR_110517
APP	chr9	74466099	74466298	200	74466130	6	5.0922	4.1425	1.60528	Intergenic	L1Md_F2|LINE|L1
APP	chr9	79104661	79104927	267	79104801	10	9.1658	6.2209	4.81433	Intergenic	L1Md_T|LINE|L1
APP	chr9	80848338	80848540	203	80848413	11	8.40176	5.5753	4.14211	Intergenic	L1Md_T|LINE|L1
APP	chr9	80960245	80960485	241	80960327	9	6.66638	4.81806	2.73012	Intergenic	L1Md_A|LINE|L1
APP	chr9	81932768	81932981	214	81932880	15	9.56811	5.47836	5.19029	Intergenic	L1Md_Gf|LINE|L1		Mei4	NM_175213
APP	chr9	82250356	82250555	200	82250484	14	9.94237	5.91374	5.53008	Intergenic	L1Md_T|LINE|L1
APP	chr9	82686495	82686776	282	82686605	9	8.44414	5.91786	4.15533	Intergenic	Intergenic		Irak1bp1;Phip	NM_001168240;NM_022986;NM_001081216
APP	chr9	83063874	83064073	200	83063953	8	6.88952	5.08983	2.88239	Intergenic	L1Md_F3|LINE|L1		Hmgn3	NM_175074;NM_026122
APP	chr9	83637255	83637473	219	83637295	7	6.16097	4.73429	2.31281	Intergenic	L1Md_F3|LINE|L1		Gm2109;Ttk;Elovl4	NM_001110265;NM_148941;NM_001284272;NR_046066;NM_009445
APP	chr9	83832837	83833037	201	83832887	9	8.44414	5.91786	4.15533	Intergenic	(CA)n|Simple_repeat|Simple_repeat		Ttk;Bckdhb	NM_001110265;NM_009445;NM_001284272;NM_199195
APP	chr9	84053304	84053569	266	84053423	7	5.81683	4.52429	2.11363	Intergenic	L1_Mus1|LINE|L1		Bckdhb	NM_199195
APP	chr9	85065325	85065524	200	85065427	12	9.45707	6.03991	5.0882	Intergenic	(TG)n|Simple_repeat|Simple_repeat
APP	chr9	86090169	86090368	200	86090243	6	5.0922	4.1425	1.60528	Intergenic	L1Md_T|LINE|L1
APP	chr9	86806775	86807008	234	86806896	6	5.0922	4.1425	1.60528	Intergenic	L1Md_F2|LINE|L1		Snap91	NM_013669;NM_001277986;NM_001277985;NM_001277982;NM_001277983;NR_102729
APP	chr9	87844850	87845197	348	87845012	14	7.61136	4.53899	3.46673	Intergenic	L1Md_T|LINE|L1
APP	chr9	88028948	88029158	211	88028970	12	8.812	5.63748	4.49604	Intergenic	L1Md_T|LINE|L1
APP	chr9	88560274	88560618	345	88560446	9	8.00723	5.65536	3.78597	Intergenic	L1Md_F2|LINE|L1		Bcl2a1d;Gm2382;Zfp949;9430037G07Rik;Trim43a	NM_001034906;NM_001142943;NR_040766;NM_001128601;NM_007536;NM_001163061
APP	chr9	90026303	90026502	200	90026451	7	4.55469	3.71687	1.33676	Intergenic	(TTTC)n|Simple_repeat|Simple_repeat		Ctsh;Tbc1d2b;Adamts7;Morf4l1	NM_194334;NM_001039147;NM_007801;NM_001003911;NM_024431
APP	chr9	90197165	90197371	207	90197197	53	10.526	2.72429	6.08165	Intergenic	Lx7|LINE|L1		Tbc1d2b	NM_194334
APP	chr9	90289313	90289570	258	90289493	10	9.1658	6.2209	4.81433	Intergenic	L1Md_T|LINE|L1
APP	chr9	91137393	91137625	233	91137430	7	6.16097	4.73429	2.31281	Intergenic	L1Md_A|LINE|L1
APP	chr9	91158282	91158481	200	91158465	10	7.38071	5.1107	3.24811	Intergenic	L1Md_T|LINE|L1		Zic1	NM_009573
APP	chr9	93810381	93810580	200	93810563	10	7.10273	4.93457	3.06699	Intergenic	L1Md_T|LINE|L1
APP	chr9	94540887	94541247	361	94540938	9	5.29738	3.94249	1.75791	Intergenic	L1Md_A|LINE|L1		Slc9a9	NM_177909
APP	chr9	95326215	95326573	359	95326398	97	11.0744	2.11546	6.60206	Intergenic	(CCCTAA)n|Simple_repeat|Simple_repeat		Chst2;U2surp	NM_026476;NM_018763;NM_001114977
APP	chr9	96194705	96194904	200	96194776	7	6.15349	4.72978	2.31281	Intron	intron (NM_178667, intron 7 of 13)		Tfdp2	NM_001184710;NM_001184711;NM_001184706;NM_001184709;NM_001184708;NM_178667
APP	chr9	97239078	97239277	200	97239151	7	6.04839	4.6662	2.31281	Intergenic	L1Md_A|LINE|L1		Trim42	NM_030219
APP	chr9	101312223	101312464	242	101312395	13	9.52851	5.8754	5.15322	Intergenic	(CA)n|Simple_repeat|Simple_repeat		LOC102633035	NR_110509
APP	chr9	101332311	101332559	249	101332514	9	4.47771	3.42398	1.32716	Intergenic	L1Md_T|LINE|L1		LOC102633035	NR_110509
APP	chr9	101688749	101689178	430	101688852	10	9.1658	6.2209	4.81433	Intergenic	L1Md_F3|LINE|L1
APP	chr9	104128964	104129320	357	104129253	7	5.81683	4.52429	2.11363	Intron	L1Md_T|LINE|L1		Dnajc13	NM_001163026
APP	chr9	109489383	109489608	226	109489506	9	8.00723	5.65536	3.78597	Intergenic	L1Md_Gf|LINE|L1		Fbxw24;Fbxw18;Fbxw19;Fbxw15	NM_001013776;NM_199036;NM_177703;NM_001033794
APP	chr9	109825788	109826003	216	109825844	9	8.00723	5.65536	3.78597	Intergenic	(CA)n|Simple_repeat|Simple_repeat		Nme6;Mir7089;Map4;Cdc25a;Camp;3000002C10Rik;Spink8	NR_033215;NM_009921;NR_106057;NM_018757;NM_001205330;NM_007658;NM_008633;NM_001205331;NM_001205332;NM_183136
APP	chr9	112278789	112279055	267	112278892	7	6.16097	4.73429	2.31281	Intergenic	L1_Mus1|LINE|L1		2900079G21Rik	NR_033433;NR_033432
APP	chr9	114077796	114077995	200	114077857	6	5.0922	4.1425	1.60528	Intergenic	Intergenic		Susd5	NM_001101510
APP	chr9	115259965	115260176	212	115259996	93	11.0977	2.15414	6.62358	Intergenic	(CCCTAA)n|Simple_repeat|Simple_repeat		Stt3b;4930428G15Rik;Stmn1-rs1	NR_029430;NM_024222;NR_040730
APP	chr9	117929401	117929600	200	117929494	7	6.15349	4.72978	2.31281	Intergenic	L1Md_F|LINE|L1		Azi2;Cmc1	NM_026442;NM_001286508;NM_001048146;NM_001286507;NM_013727
APP	chr9	118026822	118027021	200	118026940	10	8.74089	5.96188	4.42832	Intron	L1Md_F2|LINE|L1		Cmc1	NM_026442
APP	chr9	121977484	121977781	298	121977647	12	7.9867	5.12524	3.78597	Intergenic	(TG)n|Simple_repeat|Simple_repeat		Fam198a;Pomgnt2;Snrk	NM_133741;NM_153540;NM_001289558;NM_001289559;NM_001164572;NM_177743;NM_001199927;NM_001289560
APP	chr9	123782078	123782285	208	123782254	63	10.3065	2.46461	5.87818	Intergenic	Intergenic		Ccr9;Xcr1;Cxcr6;Ccr1;Fyco1	NM_011798;NM_001110253;NM_001166625;NM_148925;NM_030712;NM_009912;NM_009913
APP	chrM	331	825	495	646	286	28.8707	2.09524	24.108		Intergenic
APP	chrM	994	1463	470	1240	273	26.5081	2.05805	21.7741		Intergenic
APP	chrM	1654	1992	339	1886	226	13.5961	1.71492	9.03612		Intergenic
APP	chrM	2707	5063	2357	4812	364	51.3701	2.47712	46.0909		Intergenic
APP	chrM	5496	6084	589	5833	268	20.5763	1.87447	15.9028		Intergenic
APP	chrM	6191	6411	221	6319	195	7.65627	1.51053	3.49982		Intergenic
APP	chrM	6469	7514	1046	7240	297	35.8757	2.27747	31.0036		Intergenic
APP	chrM	7722	8805	1084	8083	320	39.4585	2.30468	34.5251		Intergenic
APP	chrM	9236	14483	5248	13761	384	55.3479	2.50824	49.8678		Intergenic
APP	chrM	14557	16262	1706	14908	340	40.8414	2.2786	35.8837		Intergenic
APP	chrX	3185191	3185394	204	3185261	15	10.3344	5.93077	5.90494	Intergenic	L1M2|LINE|L1
APP	chrX	3210891	3211298	408	3210957	19	7.00894	3.56545	2.98969	Intergenic	Intergenic
APP	chrX	3217408	3217607	200	3217466	17	8.52377	4.53929	4.22974	Intergenic	Intergenic
APP	chrX	3220548	3220747	200	3220663	15	6.76886	3.92838	2.82812	Intergenic	Intergenic
APP	chrX	3396578	3396863	286	3396707	10	7.97005	5.4825	3.78597	Intergenic	L1VL4|LINE|L1		Gm14346	NM_001085551
APP	chrX	3726970	3727169	200	3727112	11	7.81062	5.20383	3.64028	Intergenic	L1Md_F2|LINE|L1
APP	chrX	3826899	3827098	200	3826982	9	6.83856	4.92749	2.88239	Intergenic	Intergenic		Gm14347	NM_001085543
APP	chrX	4241004	4241203	200	4241147	20	6.58154	3.29276	2.65523	Intergenic	Intergenic		Gm5925	NR_040410
APP	chrX	4241462	4241717	256	4241572	16	5.95332	3.40353	2.23333	Intergenic	Intergenic		Gm5925	NR_040410
APP	chrX	4537659	4537881	223	4537789	9	6.3968	4.64609	2.49375	Intergenic	L1Md_T|LINE|L1		Gm3763;Gm3750;Gm3706	NM_001099643;NM_001243001;NM_001243024
APP	chrX	4552749	4552966	218	4552836	14	12.5308	7.50487	8.00196	Intergenic	(CA)n|Simple_repeat|Simple_repeat		Gm3763	NM_001243024
APP	chrX	4755085	4755523	439	4755441	21	9.47069	4.40457	5.10036	Intergenic	Intergenic
APP	chrX	4758189	4758388	200	4758286	19	8.56991	4.26665	4.27406	Intergenic	Intergenic
APP	chrX	4810427	4810631	205	4810467	13	9.23072	5.69189	4.8761	Intergenic	L1Md_F2|LINE|L1
APP	chrX	4966623	4966857	235	4966693	8	5.45343	4.18148	1.87107	Intergenic	L1_Mm|LINE|L1		Mycs	NM_010850
APP	chrX	5119793	5120048	256	5119914	6	5.0922	4.1425	1.60528	Intergenic	L1_Mus1|LINE|L1		Mycs	NM_010850
APP	chrX	8969694	8970095	402	8969937	7	6.16097	4.73429	2.31281	Intergenic	L1Md_T|LINE|L1		Cybb;Xk;Gm14501	NM_007807;NM_023500;NM_001085537
APP	chrX	9171829	9172206	378	9171919	10	9.64919	6.50965	5.25569	Intergenic	L1Md_T|LINE|L1		Dynlt3;Gm5132	NM_001085517;NM_025975
APP	chrX	12159074	12159273	200	12159163	7	6.16097	4.73429	2.31281	Intergenic	L1M5|LINE|L1		Gm4984;Med14;1810030O07Rik;Atp6ap2	NM_027439;NM_001101484;NM_175141;NM_001048208;NM_012005
APP	chrX	13521774	13522026	253	13521841	7	4.55469	3.71687	1.33676	Intergenic	L1Md_F2|LINE|L1		Cask	NM_009806;NM_001284503;NM_001284504;NM_001284505
APP	chrX	13769967	13770208	242	13770103	10	9.1658	6.2209	4.81433	Intergenic	L1Md_T|LINE|L1		Gm5382	NM_001034100
APP	chrX	13992456	13992757	302	13992643	11	8.40176	5.5753	4.14211	Intergenic	L1Md_F|LINE|L1
APP	chrX	14032568	14032859	292	14032669	9	8.44414	5.91786	4.15533	Intergenic	L1Md_F2|LINE|L1
APP	chrX	14165722	14165935	214	14165914	9	7.62344	5.41989	3.46838	Intergenic	Intergenic
APP	chrX	14392918	14393117	200	14393034	10	6.15787	4.33674	2.31281	Intergenic	L1Md_T|LINE|L1
APP	chrX	15168494	15168794	301	15168613	10	9.64919	6.50965	5.25569	Intergenic	L1Md_A|LINE|L1
APP	chrX	15874773	15875137	365	15874901	11	8.40176	5.5753	4.14211	Intergenic	L1Md_A|LINE|L1
APP	chrX	17001403	17001614	212	17001435	7	6.16097	4.73429	2.31281	Intergenic	L1Md_A|LINE|L1
APP	chrX	17219170	17219431	262	17219316	8	7.28	5.32607	3.17509	Intergenic	L1Md_A|LINE|L1		Fundc1	NM_028058
APP	chrX	17489634	17489833	200	17489728	10	7.67996	5.29986	3.51865	Intergenic	AT_rich|Low_complexity|Low_complexity
APP	chrX	17704680	17704879	200	17704746	13	8.94978	5.51949	4.62623	Intergenic	L1Md_F3|LINE|L1		Dusp21;Kdm6a	NM_028568;NM_009483
APP	chrX	18118969	18119168	200	18119042	7	5.81683	4.52429	2.11363	Intergenic	L1Md_T|LINE|L1		4930578C19Rik	NM_175228
APP	chrX	18768400	18768612	213	18768566	12	7.9867	5.12524	3.78597	Intergenic	L1Md_T|LINE|L1		Mir222;Mir221	NR_029807;NR_029806
APP	chrX	19017575	19017787	213	19017718	14	11.6609	6.96913	7.16209	Intergenic	L1Md_T|LINE|L1
APP	chrX	21377726	21377925	200	21377796	7	6.16097	4.73429	2.31281	Intergenic	RLTR10|LTR|ERVK		Slc6a14	NM_020049
APP	chrX	22081896	22082095	200	22081946	11	7.05525	4.73099	3.02535	Intergenic	L1Md_A|LINE|L1		Ppp1r2-ps7	NR_033731
APP	chrX	22723752	22724207	456	22723877	9	7.62344	5.41989	3.46838	Intergenic	L1Md_A|LINE|L1		Klhl13	NM_026167;NM_001290476
APP	chrX	23005201	23005400	200	23005331	11	10.8802	7.09468	6.41806	Intergenic	L1Md_F2|LINE|L1		Klhl13	NM_026167
APP	chrX	23161039	23161324	286	23161209	10	9.64919	6.50965	5.25569	Intergenic	L1Md_A|LINE|L1
APP	chrX	23191025	23191275	251	23191168	7	6.16097	4.73429	2.31281	Intergenic	GA-rich|Low_complexity|Low_complexity		Wdr44	NM_175180
APP	chrX	23409897	23410108	212	23410032	9	8.44414	5.91786	4.15533	Intergenic	L1Md_F|LINE|L1		Gm4907;Wdr44	NM_175180;NM_001034864
APP	chrX	23694748	23694947	200	23694869	9	8.44414	5.91786	4.15533	Intergenic	Intergenic
APP	chrX	23976938	23977137	200	23977055	12	9.45707	6.03991	5.0882	Intergenic	L1Md_A|LINE|L1		Gm5934	NM_001100444
APP	chrX	24249523	24249722	200	24249668	6	5.0922	4.1425	1.60528	Intergenic	L1Md_F|LINE|L1		Gm4297;Gm5935	NM_001081657;NM_001100446
APP	chrX	24468111	24468310	200	24468269	7	5.88115	4.56395	2.17541	Intergenic	L1Md_F2|LINE|L1
APP	chrX	24506330	24506535	206	24506409	12	10.8955	6.93043	6.43021	Intergenic	L1_Mus3|LINE|L1
APP	chrX	24559282	24559481	200	24559463	12	7.9867	5.12524	3.78597	Intergenic	GA-rich|Low_complexity|Low_complexity
APP	chrX	24605632	24605831	200	24605765	9	8.44414	5.91786	4.15533	Intergenic	L1Md_F2|LINE|L1		Gm5169	NM_001040669
APP	chrX	25716185	25716494	310	25716298	7	5.51507	4.33591	1.90641	Intron	L2|LINE|L2		Gm2012;Gm2030	NM_001100445;NM_001104946
APP	chrX	26154781	26154980	200	26154919	9	8.44414	5.91786	4.15533	Intron	L1Md_A|LINE|L1		Gm2012	NM_001104946
APP	chrX	26174539	26174738	200	26174597	7	6.16097	4.73429	2.31281	Intron	AT_rich|Low_complexity|Low_complexity		Gm2012	NM_001104946
[truncated: 1,291 more rows]

## Sheet: NTG Genes - List
0610010B08Rik
1110037F02Rik
1500011K16Rik
1700001J11Rik
1700003C15Rik
1700003M07Rik
1700007B14Rik
1700008F21Rik
1700012I11Rik
1700012P22Rik
1700016G22Rik
1700016P04Rik
1700025B11Rik
1700025K24Rik
1700026F02Rik
1700028E10Rik
1700030F04Rik
1700030N03Rik
1700031M16Rik
1700034F02Rik
1700046C09Rik
1700047L14Rik
1700052I22Rik
1700061F12Rik
1700061I17Rik
1700065J11Rik
1700080E11Rik
1700092C10Rik
1700095A21Rik
1700109I08Rik
1700110K17Rik
1700111N16Rik
1700112E06Rik
1700113H08Rik
1810058I24Rik
2010109A12Rik
2210404O09Rik
2210408F21Rik
2210420H20Rik
2310005E17Rik
2310009B15Rik
2310057J18Rik
2610005L07Rik
2610016A17Rik
2610018G03Rik
2610035F20Rik
2610203C22Rik
2700054A10Rik
2700099C18Rik
2810007J24Rik
2810032G03Rik
2810047C21Rik1
2810403D21Rik
3110007F17Rik
3110015C05Rik
3110035E14Rik
3200001D21Rik
4921504E06Rik
4921507P07Rik
4921511C20Rik
4930404A10Rik
4930412C18Rik
4930412D23Rik
4930428D18Rik
4930428G15Rik
4930429F11Rik
4930442J19Rik
4930443O20Rik
4930445N18Rik
4930452N14Rik
4930455H04Rik
4930470H14Rik
4930474G06Rik
4930478L05Rik
4930480G23Rik
4930486L24Rik
4930502A04Rik
4930503E14Rik
4930509J09Rik
4930513D17Rik
4930515G16Rik
4930515L03Rik
4930515L19Rik
4930518P08Rik
4930519F09Rik
4930519F24Rik
4930519H02Rik
4930520O04Rik
4930524B15Rik
4930524O05Rik
4930525D18Rik
4930527G23Rik
4930529C04Rik
4930529K09Rik
4930532M18Rik
4930533P14Rik
4930552N02Rik
4930555G01Rik
4930556M19Rik
4930568E12Rik
4930578C19Rik
4930578E11Rik
4930584F24Rik
4930592A05Rik
4930592I03Rik
4930595M18Rik
4930598F16Rik
4931428L18Rik
4931429I11Rik
4932414J04Rik
4932441J04Rik
4933400L20Rik
4933406F09Rik
4933411K20Rik
4933426M11Rik
4933436I01Rik
4933438K21Rik
5330434G04Rik
5430401F13Rik
5430402O13Rik
5430416O09Rik
5530601H04Rik
5730416F02Rik
6820408C15Rik
6820431F20Rik
7420701I03Rik
7630403G23Rik
8030423J24Rik
9030619P08Rik
9130008F23Rik
9130024F11Rik
9130204L05Rik
9130209A04Rik
9330182O14Rik
9430037G07Rik
9430076C15Rik
9530036O11Rik
A230072C01Rik
A330033J07Rik
A330048O09Rik
A330050F15Rik
A530032D15Rik
A530053G22Rik
A530065N20Rik
A630010A05Rik
A630073D07Rik
A630077J23Rik
A730020E08Rik
A730046J19Rik
A730082K24Rik
A830009L08Rik
A830018L16Rik
A930001A20Rik
A930003O13Rik
AA792892
Aadac
Aadacl2
Aard
Aass
Abca5
Abcb1a
Abcb4
Abcb5
Abcb7
Abcc1
Abhd8
Ablim1
Abt1
Acad9
Ackr1
Acot10
Acp1
Acsl1
Acsl3
Acsl6
Actbl2
Actr3
Actr8
Adam22
Adam26a
Adam26b
Adam28
Adamts12
Adamts16
Adamts17
Adamts2
Adarb2
Adck1
Adgb
Adhfe1
Adm2
Adrb3
Adss
Afg3l1
Agbl1
Agbl4
Agps
Agr3
Agtr1b
Agtr2
Agxt2
AI747448
Akr1c14
Aldh1a1
Aldh1a7
Alpk1
Alpl
Ambn
Amd1
Amd2
Amph
Amt
Amtn
Ang6
Ankle1
Ankrd42
Ankrd44
Ankrd55
Ankrd7
Ankub1
Ano2
Ano8
Aoah
Apba2
Apip
Aplnr
Apol10a
Apol10b
Apol11a
Apol11b
Apol7c
App
Arap2
Arhgap15
Arhgap36
Arhgap6
Arhgdib
Arhgef9
Armc4
Armc9
Armcx2
Arrdc4
Art4
Asah1
Asb3
Asb5
Ascl1
Asic2
Asph
Astn2
Asxl3
Atg4c
Atp2b1
Atp6v0d2
Atp6v1h
Atp8a2
Atp8b4
Atxn10
Auts2
AW209491
AW551984
AY512915
AY761184
B230118H07Rik
B3gnt2
B3gnt5
B3gnt7
B630019K06Rik
Baalc
Babam1
Bach2
Bai3
Bard1
BB019430
BB287469
Bbox1
BC023829
BC030870
BC035044
BC049715
BC051665
Bcl2a1a
Bcl2a1b
Bcl2a1c
Bcl2a1d
Bcl7a
Bhlhe22
Bicc1
Bmp5
Brinp3
Brwd3
Bsph2
Btbd3
Btn1a1
Btn2a2
C030034I22Rik
C130026I21Rik
C130030K03Rik
C130036L24Rik
C230035I16Rik
C2cd4d
C630028M04Rik
C730002L08Rik
C77370
Cacna1e
Cacng5
Cadm1
Cadm3
Cadps2
Calb1
Camta1
Capsl
Car1
Car13
Car2
Car3
Car8
Casp7
Ccdc113
Ccdc144b
Ccdc148
Ccdc174
Ccdc34
Ccdc34os
Ccdc59
Ccdc88a
Ccdc90b
Ccnc
Ccng1
Ccng2
Ccni
Ccny
Ccser1
Cd200r2
Cd2ap
Cd44
Cd53
Cd97
Cdc42ep3
Cdh18
Cdh19
Cdk14
Cdk16
Cdkal1
Celf2
Cenpq
Cenpw
Cep170
Cep85l
Ces5a
Cfap20
Cfhr1
Chdh
Chfr
ChkbCpt1b
Chrm2
Chrm3
Chrna6
Chrnb3
Chst2
Chsy3
Clca1
Clca2
Clca4
Clca6
Cldn16
Clec14a
Clec2g
Clec2h
Clrn2
Clvs2
Cndp1
Cndp2
Cngb3
Cnot6l
Cntn4
Cntnap2
Cntnap5a
Cobl
Col19a1
Col3a1
Col4a3
Col4a4
Commd2
Cops2
Coq10b
Cox7b2
Cpa3
Cpb1
Cpeb3
Cpeb4
Cpne4
Cpsf7
Cpt1b
Creb5
Crisp4
Crnn
Crot
Crtap
Cryz
Csl
Csmd1
Csmd3
Csnk2a2
Cspp1
Csrp1
Ctbs
Ctla2a
Ctla2b
Ctnna2
Ctnna3
Ctsll3
Cwh43
Cxcl1
Cxcl13
Cxcl2
Cyb561a3
Cycs
Cylc2
Cyp26a1
Cyp26c1
Cyp2b10
Cyp2b13
Cyp2c44
Cyp2c69
Cyp2j12
Cyp2j13
Cyp3a16
Cyp3a25
Cyp3a41b
Cyp3a59
Cyp4a12a
Cyp4a12b
Cyp4a29
Cyp7b1
Cypt12
Cypt15
Cypt3
D130009I18Rik
D16Ertd472e
D2hgdh
D3Ertd254e
D430041D05Rik
D5Ertd577e
D5Ertd579e
D6Ertd474e
Daam1
Dab2ip
Dak
Dbndd1
Dcaf12l1
Dcaf6
Dcbld2
Dcc
Dcdc2c
Dck
Dcstamp
Dcun1d5
Dda1
Ddb1
Ddit4l
Ddx18
Ddx39
Decr1
Def8
Defa17
Defa24
Defa26
Defa4
Defa6
Defa-ps1
Defb1
Defb12
Defb14
Defb19
Defb2
Defb20
Defb21
Defb22
Defb23
Defb25
Defb26
Defb28
Defb29
Defb34
Defb36
Defb38
Defb39
Defb4
Defb45
Dennd1b
Desi2
Det1
Dgki
Dgkq
Dhrs3
Dlg2
Dlgap5
Dmd
Dmrt2
Dmtf1
Dnah9
Dnajc10
Dnal1
Dnm3
Dock10
Dock11
Dock2
Dock3
Dok5
Dopey2
Dph6
Dpy19l2
Dpy19l4
Dpys
Dscam
Dsel
Dtwd1
Duox1
Dusp10
Dusp5
Dync2h1
Dzip3
E030003E18Rik
E330017A01Rik
Ear1
Ear12
Ear2
Ear3
Echdc1
Eci2
Eci3
Edar
Eepd1
Egfem1
Egflam
Ei24
Eif4ebp1
Eif4g3
Elmo1
Elmsan1
Emc2
Emr1
Enam
Enkur
Enpp6
Erbb4
Erc2
Ercc6
Erp27
Esp31
Esr1
Esrp1
Etaa1
Etnk1
Exoc4
Exoc6
Exoc6b
Ezh2
F8
F830016B08Rik
F8a
Fabp5
Fam110b
Fam110c
Fam115a
Fam135a
Fam135b
Fam150b
Fam154a
Fam170a
Fam172a
Fam180a
Fam184a
Fam198a
Fam19a1
Fam20c
Fam221b
Fam227b
Fam92a
Fancl
Far1
Farp1
Farsb
Fat3
Fbln1
Fbln5
Fbxl4
Fbxo4
Fbxw14
Fbxw20
Fbxw22
Fbxw28
Fcer1a
Fermt1
Fez1
Fgf1
Fgf13
Fgf14
Fgfrl1
Fhit
Fhl5
Fibin
Flg2
Flnb
Fmo9
Foxp1
Foxp2
Fpr-rs3
Fras1
Frg1
Frmd3
Frmd4a
Fsip1
Fstl5
Ftmt
Fto
Ftx
Fundc1
Fut8
Fut9
Fzd1
Fzd6
G530011O06Rik
G630055G22Rik
Gabra3
Gabra4
Gabrg1
Gabrg2
Gabrg3
Galnt13
Galnt4
Galntl6
Gas8
Gata6
Gbe1
Gbf1
Gbp11
Gbp6
Gfral
Gipc1
Glra1
Glra3
Glyatl3
Gm10058
Gm10096
Gm10147
Gm10230
Gm10377
Gm10406
Gm10512
Gm10635
Gm10636
Gm10662
Gm10665
Gm10670
Gm10677
Gm10857
Gm10922
Gm11236
Gm11237
Gm12886
Gm12888
Gm13057
Gm13139
Gm13178
Gm13247
Gm13483
Gm13769
Gm14151
Gm14347
Gm14351
Gm14431
Gm14436
Gm14496
Gm14625
Gm14725
Gm14781
Gm15080
Gm1527
Gm15315
Gm15319
Gm15987
Gm16291
Gm16367
Gm16386
Gm16404
Gm16430
Gm16432
Gm16998
Gm17066
Gm17660
Gm17821
Gm1821
Gm18409
Gm19276
Gm19395
Gm19784
Gm1995
Gm20110
Gm2012
Gm2016
Gm2022
Gm20337
Gm2042
Gm20740
Gm20754
Gm2087
Gm21319
Gm21637
Gm21951
Gm2382
Gm2799
Gm2825
Gm2837
Gm2863
Gm2913
Gm2927
Gm2933
Gm3259
Gm3264
Gm3286
Gm3558
Gm364
Gm3696
Gm3706
Gm3750
Gm4133
Gm4175
Gm4177
Gm4187
Gm4214
Gm4216
Gm428
Gm4297
Gm438
Gm44
Gm4489
Gm4567
Gm4710
Gm4719
Gm4788
Gm4836
Gm4841
Gm4847
Gm4944
Gm4951
Gm4975
Gm5089
Gm5124
Gm5127
Gm5150
Gm5168
Gm5177
Gm525
Gm5294
Gm5334
Gm5346
Gm5725
Gm5726
Gm5728
Gm5797
Gm5803
Gm5886
Gm5891
Gm609
Gm6260
Gm6289
Gm6460
Gm6567
Gm6592
Gm6696
Gm6710
Gm6938
Gm7361
Gm7609
Gm7849
Gm7861
Gm813
Gm8221
Gm8633
Gm8660
Gm8677
Gm8693
Gm8720
Gm8898
Gm9079
Gm94
Gm9696
Gm973
Gm9731
Gm9733
Gm9871
Gmcl1l
Gnai1
Golim4
Gp49a
Gp6
Gpc5
Gpc6
Gpihbp1
Gpr101
Gpr111
Gpr115
Gpr139
Gpr158
Gpr165
Gpr176
Gprc5b
Gramd1b
Grb14
Greb1
Greb1l
Grik2
Grin2a
Gtpbp3
Gucy2c
Gulp1
Gxylt1
Gyg
H1fnt
H2afj
H2-M1
H2-M10.5
H2-M9
Hace1
Hao1
Hao2
Haus6
Havcr1
Hdac2
Hdx
Hecw1
Helt
Heph
Herc4
Herc6
Hint2
Hist4h4
Hivep1
Hltf
Hmgcll1
Hmgn5
Hmmr
Hnf4g
Hnmt
Homer1
Hook1
Hpgd
Hrct1
Hrnr
Hs6st1
Hsd11b1
Hsd17b11
Hsd17b13
Hsd3b1
Hsd3b2
Hsd3b3
Hsd3b5
Hsd3b6
Hsf3
Hspd1
Hspe1
Htr1f
Htr2c
Htr4
Htr5a
Hunk
Huwe1
Id4
Ids
Idua
Ifngr1
Igsf9b
Iigp1
Ikzf2
Il17rb
Il1rap
Il1rapl1
Il1rapl2
Il22ra2
Il23r
Il6st
Immp2l
Impg2
Inpp4b
Inpp5a
Ints4
Ipmk
Ipo11
Iqck
Itgb8
Itgbl1
Ivl
Iyd
Jade3
Jakmip2
Jam3
Kbtbd8
Kcnb2
Kcnd2
Kcne4
Kcnh1
Kcnh7
Kcnip4
Kcnj6
Kcnk10
Kctd12b
Kdm4c
Khdrbs3
Kif26b
Klf12
Klf6
Klf9
Klhdc7b
Klhl4
Klhl8
Klrb1
Klrb1b
Klrb1c
Ky
Lactbl1
Lama1
Lamp3
Lao1
Lap3
Large
Lax1
Lce1a1
Lce6a
Lcorl
Lgals3
Lgmn
Lgr5
Lgsn
Lhfpl3
Lhx9
Lilra5
Lilrb4
Limch1
Lin28b
Lingo2
Lipc
Lmbrd1
Lmf2
LOC100038947
LOC100048884
LOC100502896
LOC100861615
LOC100862015
LOC101055863
LOC102634101
LOC102635087
Lonrf1
Lpar1
Lpar3
Lphn3
Lpin1
Lppr5
Lrp1b
Lrp5
Lrp6
Lrrc3b
Lrrc4c
Lrrc55
Lrrc69
Lrrc8b
Lrrfip2
Lrrn1
Lrrtm4
Lsm8
Ltbp1
Luzp2
Luzp4
Ly6a
Ly6c1
Ly6c2
Ly6h
Lypd6
Lyst
Macc1
Macrod2
Magi2
Mal2
Man1a
Map2k6
Map3k5
Map3k7
Mapk1ip1l
Marcks
Masp1
Mast4
Mat2b
Mbnl2
Mctp1
Mdh1
Me3
Megf9
Mettl11b
Mettl13
Mettl25
Mettl4
Mgat1
Mgat4c
Mgp
Mid1
Miox
Mir1195
Mir1668
Mir1906-1
Mir201
Mir21b
Mir3095
Mir350
Mir3535
Mir374b
Mir374c
Mir384
Mir421
Mir448
Mir5112
Mir547
Mir5619
Mir6238
Mir6355
Mir6359
Mir6400
Mir6411
Mir6897
Mir6947
Mir6959
Mir7007
Mir704
Mir710
Mir7223
Mir7663
Mlxip
Mmadhc
Mmp12
Mmp13
Mmp1b
Mmrn1
Mob4
Mogat1
Mptx1
Mptx2
Mrap2
Mrgpra2b
Mrpl3
Mrpl32
Mrpl34
Mthfd2l
Mtif2
Mtnr1b
Mtpap
Mtx3
Mup19
Mup2
Mup5
Musk
Mut
Mycbp2
Myl1
Myo1b
Myo3a
Myo9b
Mypn
Naip1
Naip5
Naip6
Naip7
Nalcn
Nanp
Nbea
Ncald
Ncaph2
Ncl
Ncr1
Ndufb11
Nedd1
Negr1
Nek11
Nell1
Neo1
Neurod4
Nfe2l2
Nhs
Nkain2
Nkain3
Nkx2-2os
Nkx2-6
Nkx3-1
Nlgn1
Nmur1
Nol4
Nov
Npbwr1
Nphs2
Npr2
Npvf
Nr2f6
Nrcam
Nrg3
Nsg2
Nsun6
Ntng1
Ntsr2
Nubpl
Nudcd2
Nudt16
Nudt9
Nup205
Nxf2
Nyap2
Obox1
Obox3
Obox5
Oca2
Ocel1
Odf3b
Ogfod3
Olfr10
Olfr1130
Olfr1131
Olfr1132
Olfr1133
Olfr1134
Olfr1135
Olfr1136
Olfr1137
Olfr1138
Olfr1140
Olfr1141
Olfr1193
Olfr1195
Olfr1196
Olfr1197
Olfr1198
Olfr1199
Olfr1200
Olfr1201
Olfr1202
Olfr1204
Olfr1205
Olfr1206
Olfr1213
Olfr1214
Olfr1215
Olfr1216
Olfr1217
Olfr1218
Olfr1219
Olfr1220
Olfr1221
Olfr1222
Olfr1223
Olfr1240
Olfr1241
Olfr1242
Olfr1243
Olfr1245
Olfr1246
Olfr1247
Olfr1248
Olfr1255
Olfr1256
Olfr1257
Olfr1258
Olfr1259
Olfr1260
Olfr1261
Olfr1270
Olfr1271
Olfr1272
Olfr1273-ps
Olfr1298
Olfr1320
Olfr1328
Olfr1329
Olfr1330
Olfr1331
Olfr1333
Olfr1335
Olfr1337
Olfr1388
Olfr1389
Olfr1390
Olfr1391
Olfr1392
Olfr1393
Olfr1402
Olfr1404
Olfr1406
Olfr1408
Olfr142
Olfr1431
Olfr1453
Olfr1454
Olfr1457
Olfr1459
Olfr1461
Olfr1462
Olfr148
Olfr1506
Olfr159
Olfr175-ps1
Olfr176
Olfr177
Olfr178
Olfr18
Olfr180
Olfr181
Olfr183
Olfr191
Olfr192
Olfr193
Olfr194
Olfr195
Olfr196
Olfr197
Olfr198
Olfr199
Olfr201
Olfr218
Olfr220
Olfr248
Olfr257
Olfr266
Olfr283
Olfr284
Olfr285
Olfr286
Olfr293
Olfr294
Olfr295
Olfr297
Olfr298
Olfr29-ps1
Olfr3
Olfr33
Olfr348
Olfr350
Olfr351
Olfr352
Olfr353
Olfr354
Olfr355
Olfr356
Olfr378
Olfr38
Olfr39
Olfr414
Olfr417
Olfr418-ps1
Olfr419
Olfr44
Olfr441
Olfr444
Olfr449
Olfr45
Olfr450
Olfr452
Olfr453
Olfr46
Olfr48
Olfr50
Olfr53
Olfr538
Olfr539
Olfr541
Olfr557
Olfr558
Olfr559
Olfr560
Olfr561
Olfr564
Olfr566
Olfr568
Olfr569
Olfr570
Olfr571
Olfr572
Olfr582
Olfr583
Olfr584
Olfr585
Olfr586
Olfr589
Olfr591
Olfr592
Olfr593
Olfr594
Olfr61
Olfr631
Olfr632
Olfr633
Olfr635
Olfr638
Olfr639
Olfr64
Olfr640
Olfr641
Olfr642
Olfr643
Olfr65
Olfr66
Olfr70
Olfr71
Olfr724
Olfr725
Olfr726
Olfr727
Olfr728
Olfr729
Olfr78
Olfr790
Olfr791
Olfr792
Olfr794
Olfr796
Olfr798
Olfr799
Olfr800
Olfr801
Olfr802
Olfr823
Olfr824
Olfr825
Olfr826
Olfr827
Olfr872
Olfr873
Olfr915
Olfr916
Olfr917
Olfr918
Olfr919
Olfr920
Olfr921
Olfr954
Olfr955
Olfr957
Olfr958
Olfr959
Olfr960
Olfr974
Olfr975
Olfr976
Olfr978
Olfr979
Olfr980
Olfr981
Olfr982
Olfr983
Olfr984
Olfr985
Olfr986
Ophn1
Osmr
Ott
P2rx3
Palmd
Papd4
Papolg
Pappa2
Paxip1
Pcca
Pcdh11x
Pcdh9
Pcdha1
Pcdha10
Pcdha11
Pcdha12
Pcdha2
Pcdha3
Pcdha4
Pcdha4-g
Pcdha5
Pcdha6
Pcdha6-g
Pcdha7
Pcdha7-g
Pcdha8
Pcdha9
Pcf11
Pcm1
Pcnxl2
Pdcd1
Pde10a
Pde1c
Pde3a
Pde4b
Pde4d
Pde6h
Pde7a
Pdgfrl
Pdhx
Pdia4
Pdzk1
Penk
Pet2
Pgm5
Phactr2
Phkb
Pid1
Piezo2
Pip5k1b
Pira6
Pitx3
Pkhd1
Pkn1
Pknox2
Plch1
Plin2
Pln
Plvap
Plxnc1
Pnma1
Poc1b
Pom121l12
Pomgnt2
Pot1b
Pou3f2
Ppef1
Pphln1
Ppp1r12b
Ppp1r32
Ppp1r9a
Ppp2r2b
Ppp3ca
Ppp6r2
Prdm13
Prdx6b
Prelid2
Prh1
Prkca
Prkcq
Prkdc
Prmt6
Prol1
Prorsd1
Prp2
Prr16
Prr32
Prss54
Psd3
Psma2
Psmd14
Psmd9
Ptger1
Ptgr2
Ptpn14
Ptprd
Ptprk
Ptprt
Ptprz1
Qdpr
Qrfpr
Rab2a
Rab32
Rabgap1l
Rad21
Rai14
Ralgapa1
Rarb
Rasd2
Rasef
Rasgrp3
Rbm10
Rbm12b1
Rbm20
Rbm26
Rbm33
Reep3
Rel
Reln
Rem1
Rerg
Retnla
Retnlb
Retnlg
Rex2
Rfc3
Rfpl4b
Rftn2
Rgn
Rgs13
Rgs2
Rgs21
Rhou
Rhox3h
Rictor
Rimbp2
Rims2
Ripply3
Rit2
Rlf
Rn4.5s
Rnf13
Rnf146
Rnf150
Rock1
Rorc
Rpe65
Rprl2
Rps27a
Rraga
Rrm2b
Rrs1
Rspo3
Rsrc1
Rtp1
Rttn
Rundc3b
Samd12
Satb2
Sbf1
Sbf2
Scamp1
Scaper
Scarna8
Scgb1b24
Scgb2b17
Scgb2b23-ps
Scgb2b24
Scgb3a2
Scn1a
Scn2a1
Scn3a
Scn3b
Scn7a
Sco2
Sdhaf2
Sdr16c5
Sdr16c6
Sel1l
Selk
Sema3a
Sema6a
Serpinb12
Serpinb13
Serpinb3a
Serpinb3d
Serpinb6c
Serpinb6d
Setdb2
Sf3b1
Sgcd
Sgcz
Sgip1
Sh2d4a
Sh3rf3
Sh3yl1
Shh
Siglech
Sirt1
Skint3
Skint6
Skint8
Skint9
Skor2
Slc10a1
Slc13a4
Slc16a2
Slc22a22
Slc22a6
Slc22a8
Slc25a37
Slc25a4
Slc26a1
Slc2a12
Slc30a5
Slc36a4
Slc44a1
Slc4a10
Slc4a4
Slc5a7
Slc5a9
Slc7a13
Slc8a1
Slc9a9
Slco3a1
Slx4ip
Smc3
Smco3
Smcp
Smo
Smok2a
Smok2b
Smyd2
Snca
Snora75
Snord82
Snrk
Snrpe
Sntg1
Sntn
Snx27
Soat1
Socs4
Socs6
Sorbs2
Sorcs1
Sp4
Spag11a
Spag11b
Spag16
Spag8
Sparcl1
Spata1
Spata16
Spata4
Spata6
Spcs3
Spdl1
Spdya
Speer4c
Speer7-ps1
Spin2d
Spin4
Spink3
Spink5
Spock3
Sprr1a
Sprr3
Sprr4
Spry2
Spta1
Srek1
Srgap1
Srpk2
Srpx
Srsf5
Ssrp1
Sstr1
Ssx2ip
Ssx9
Ssxb1
Ssxb10
Ssxb2
Ssxb5
Ssxb9
St18
St3gal6
St6gal1
St6gal2
St8sia6
Stard3nl
Stat4
Stc1
Stk31
Stk32b
Stmn1-rs1
Stt3a
Stt3b
Stx7
Sucnr1
Sult1b1
Sult2a3
Sult2a5
Sult2a7
Sva
Sval1
Sval3
Syce3
Sycp1
Syne1
Synpr
Syt16
Syt4
Sytl5
Taar7a
Taar7b
Taar7d
Taar7e
Taar7f
Taar8a
Taar8b
Taar8c
Taar9
Tacstd2
Taf2
Tars
Tas2r102
Tas2r104
Tas2r105
Tas2r106
Tas2r107
Tas2r110
Tas2r113
Tas2r114
Tas2r115
Tas2r116
Tas2r117
Tas2r118
Tas2r120
Tas2r121
Tas2r122
Tas2r123
Tas2r124
Tas2r125
Tas2r130
Tas2r136
Tbl1xr1
Tbpl1
Tbr1
Tbx15
Tc2n
Tcf12
Tcf21
Tcp10c
Tdpoz1
Tdpoz2
Tdpoz3
Tdpoz4
Tdrd5
Tecrl
Tek
Tenm1
Tes
Tet2
Tex24
Tgfbr3
Thbs1
Thbs2
Thbs4
Them4
Them5
Themis
Thnsl1
Thoc2
Thsd7b
Timd4
Tle1
Tll1
Tlr8
Tm4sf1
Tm4sf4
Tmc1
Tmed11
Tmem125
Tmem131
Tmem138
Tmem164
Tmem207
Tmem216
Tmem225
Tmem241
Tmem243
Tmem252
Tmem261
Tmem28
Tmem45b
Tmem5
Tmem8b
Tmsb15l
Tmx3
Tmx4
Tnfrsf11a
Tnks1bp1
Tnni3k
Tpbpa
Tpbpb
Tpd52l1
Tph2
Tpp2
Trdn
Trhde
Trim43a
Trim43b
Triqk
Trmt61b
Trpc5
Trpm3
Trps1
Tshb
Tspan2
Tspan2os
Tspyl5
Ttc25
Ttpa
Tubb2a-ps2
Tymp
Tyw3
U2surp
Uba1
Ubqln2
Uck2
Ufl1
Uggt1
Ugt2a1
Ugt2a2
Ugt2a3
Ugt2b37
Ugt2b38
Ugt2b5
Ugt3a1
Ugt3a2
Unc5d
Upp2
Use1
Ushbp1
Usp17ld
Ust
Utp14b
Uty
Uxs1
Vamp4
Vav3
Veph1
Vmn1r100
Vmn1r101
Vmn1r114
Vmn1r115
Vmn1r116
Vmn1r117
Vmn1r118
Vmn1r135
Vmn1r148
Vmn1r149
Vmn1r151
Vmn1r152
Vmn1r155
Vmn1r157
Vmn1r158
Vmn1r159
Vmn1r160
Vmn1r163
Vmn1r167
Vmn1r168
Vmn1r169
Vmn1r170
Vmn1r171
Vmn1r172
Vmn1r226
Vmn1r227
Vmn1r30
Vmn1r31
Vmn1r35
Vmn1r36
Vmn1r37
Vmn1r38
Vmn1r39
Vmn1r60
Vmn1r61
Vmn1r64
Vmn1r66
Vmn1r77
Vmn1r-ps79
Vmn2r110
Vmn2r112
Vmn2r118
Vmn2r13
Vmn2r14
Vmn2r15
Vmn2r16
Vmn2r18
Vmn2r28
Vmn2r34
Vmn2r46
Vmn2r52
Vmn2r58
Vmn2r69
Vmn2r72
Vmn2r73
Vmn2r8
Vmn2r9
Vmn2r-ps54
Vps13b
Vps13d
Vrk2
Vsig4
Vwa5a
Vwce
Wbp11
Wbscr17
Wdhd1
Wdpcp
Wdr17
Wdr27
Wdr37
Wwp1
Xiap
Xk
Xlr3b
Xlr3c
Xlr4b
Xlr4c
Xlr5c
Xrcc4
Yaf2
Zbed6
Zbtb14
Zc3h11a
Zcchc13
Zcchc5
Zcrb1
Zfand3
Zfa-ps
Zfp202
Zfp229
Zfp26
Zfp275
Zfp322a
Zfp330
Zfp398
Zfp407
Zfp41
Zfp410
Zfp459
Zfp516
Zfp560
Zfp619
Zfp641
Zfp648
Zfp758
Zfp760
Zfp786
Zfp788
Zfp804a
Zfp820
Zfp825
Zfp944
Zfp946
Zfp949
Zfp957
Zfp97
Zic2
Zic5
Zmat1
Znf41-ps
Zswim2
Zxda

## Sheet: NTG Genes - Peak info
Condition	chr	peak start	peak end	length	abs_summit	pileup	-LOG10(pvalue)	fold_enrichment	-LOG10(qvalue)	Annotation	Detailed Annotation	Gene	Accession
NTG	chr1	4074809	4075008	200	4074897	9	9.8269	6.69864	5.3288	Intergenic	L1Md_A|LINE|L1
NTG	chr1	5811207	5811412	206	5811333	6	5.03536	4.10784	1.41082	Intergenic	L1Md_A|LINE|L1	Npbwr1	NM_010342
NTG	chr1	6557053	6557616	564	6557461	15	15.3461	8.97722	10.6714	Intron	L1Md_T|LINE|L1	St18	NM_001244692;NM_001244693
NTG	chr1	6731669	6731872	204	6731777	8	8.65321	6.10087	4.23101	Intron	intron (NM_001244692, intron 3 of 23)	St18	NM_173868;NR_045188;NR_045189;NM_001244692;NM_001244693
NTG	chr1	6908863	6909062	200	6908938	7	6.90854	5.16929	2.77038	Intergenic	L1Md_A|LINE|L1	St18	NM_173868;NR_045188;NR_045189;NM_001244692;NM_001244693
NTG	chr1	7276544	7276746	203	7276608	12	7.89559	5.06906	3.58616	Intergenic	L1Md_T|LINE|L1
NTG	chr1	8682428	8682627	200	8682485	6	5.36399	4.30549	1.69697	Intron	L1Md_A|LINE|L1	Sntg1	NM_001290390;NM_001290392;NM_001290393;NM_027671
NTG	chr1	9111828	9112039	212	9111896	9	7.93401	5.61077	3.60345	Intron	L1Md_A|LINE|L1	Sntg1	NM_001290390;NM_001290392;NM_001290393;NM_027671
NTG	chr1	10113072	10113303	232	10113146	6	6.14427	4.74512	2.14251	Intron	L1VL1|LINE|L1	Cspp1	NM_026493
NTG	chr1	11485553	11485752	200	11485696	7	7.37347	5.423	3.10364	Intron	L1MD1|LINE|L1	A830018L16Rik	NM_001160370;NM_001160371;NM_001160369;NM_177173
NTG	chr1	11665444	11665662	219	11665566	8	6.48191	4.83737	2.42644	Intron	L1Md_A|LINE|L1	A830018L16Rik	NM_177173;NM_001160369
NTG	chr1	11665719	11665924	206	11665920	8	4.41706	3.50935	1.21359	Intron	L1Md_A|LINE|L1	A830018L16Rik	NM_177173;NM_001160369
NTG	chr1	12258684	12258919	236	12258705	9	7.93401	5.61077	3.60345	Intergenic	L1Md_F2|LINE|L1
NTG	chr1	14471554	14471796	243	14471635	8	5.88955	4.46213	2.09186	Intergenic	L1Md_T|LINE|L1
NTG	chr1	20080828	20081027	200	20081007	6	5.99518	4.6646	2.14251	Intron	L1Md_F2|LINE|L1	Pkhd1	NM_153179
NTG	chr1	20516788	20517038	251	20516906	7	7.37347	5.423	3.10364	Intron	L1Md_T|LINE|L1	Pkhd1	NM_153179
NTG	chr1	24618355	24619436	1082	24619070	266	25.3475	2.04035	20.551	Intergenic	AT_rich|Low_complexity|Low_complexity	Lmbrd1;Col19a1	NM_026719;NM_007733
NTG	chr1	24620604	24620851	248	24620730	157	8.64173	1.64501	4.23101	Intergenic	Intergenic	Lmbrd1;Col19a1	NM_026719;NM_007733
NTG	chr1	24621057	24621642	586	24621321	231	16.7375	1.82751	12.0344	Intergenic	Intergenic	Lmbrd1;Col19a1	NM_026719;NM_007733
NTG	chr1	24621995	24622416	422	24622238	211	17.8785	1.93187	13.1573	Intergenic	Intergenic	Lmbrd1;Col19a1	NM_026719;NM_007733
NTG	chr1	24622540	24622847	308	24622736	158	10.3568	1.74048	5.82576	Intergenic	Intergenic	Lmbrd1;Col19a1	NM_026719;NM_007733
NTG	chr1	25721540	25721789	250	25721623	9	7.55076	5.37485	3.27001	Intron	L1Md_T|LINE|L1	Bai3	NM_175642
NTG	chr1	27085428	27085675	248	27085605	7	7.37347	5.423	3.10364	Intergenic	L1Md_F2|LINE|L1
NTG	chr1	29612337	29612536	200	29612472	7	7.37347	5.423	3.10364	Intergenic	L1Md_F2|LINE|L1
NTG	chr1	31134137	31134336	200	31134310	9	6.3263	4.60102	2.3016	Intergenic	L1Md_T|LINE|L1	Lgsn;4931428L18Rik	NR_033445;NM_153601
NTG	chr1	33312580	33312804	225	33312655	8	8.12707	5.81545	3.77667	Intergenic	L1Md_A|LINE|L1
NTG	chr1	37012379	37012586	208	37012520	11	10.2729	6.73292	5.74425	Intergenic	L1Md_T|LINE|L1	Tmem131	NM_018872
NTG	chr1	41525666	41526016	351	41525820	7	5.75922	4.48861	1.97086	Intergenic	L1Md_A|LINE|L1
NTG	chr1	41736604	41736828	225	41736654	9	7.93401	5.61077	3.60345	Intergenic	L1_Mm|LINE|L1
NTG	chr1	44784629	44784828	200	44784696	10	7.30242	5.06112	3.10364	Intron	L1Md_T|LINE|L1	Gulp1	NM_028450
NTG	chr1	45260552	45260878	327	45260568	9	5.2296	3.89928	1.58893	Intergenic	L1Md_A|LINE|L1
NTG	chr1	46620486	46620816	331	46620561	7	5.75922	4.48861	1.97086	Intergenic	L1Md_A|LINE|L1
NTG	chr1	48424107	48424366	260	48424210	8	7.63555	5.53563	3.33946	Intergenic	L1Md_Gf|LINE|L1
NTG	chr1	48424630	48424877	248	48424720	10	7.30242	5.06112	3.10364	Intergenic	L1Md_Gf|LINE|L1
NTG	chr1	48552743	48553070	328	48552836	8	5.88955	4.46213	2.09186	Intergenic	Intergenic
NTG	chr1	48605108	48605326	219	48605230	9	9.39086	6.46161	4.91452	Intergenic	L1Md_T|LINE|L1
NTG	chr1	48751334	48751556	223	48751426	10	9.08475	6.17184	4.62779	Intergenic	L1Md_T|LINE|L1
NTG	chr1	49984164	49984498	335	49984338	12	9.36316	5.98132	4.8935	Intergenic	(TG)n|Simple_repeat|Simple_repeat
NTG	chr1	52009973	52010172	200	52010095	6	4.74446	3.92754	1.36794	Intergenic	(GAAA)n|Simple_repeat|Simple_repeat	Stat4;Myo1b	NM_001161817;NM_011487;NM_001290982;NM_010863
NTG	chr1	54877543	54878373	831	54878130	28	13.4376	5.09332	8.80505	Intron	intron (NM_001081433, intron 2 of 27)	Ankrd44	NM_001081433
NTG	chr1	55154254	55154489	236	55154436	10	7.30242	5.06112	3.10364	Intergenic	(TG)n|Simple_repeat|Simple_repeat	Hspd1;Sf3b1;Coq10b;Rftn2;Hspe1;Mob4	NM_010477;NM_031179;NM_008303;NM_026424;NM_028713;NM_001039710;NM_025283
NTG	chr1	57125950	57126149	200	57126094	8	6.82411	5.04969	2.71632	Intergenic	L1Md_T|LINE|L1	9130024F11Rik;Satb2	NR_024325;NM_139146;NR_024326
NTG	chr1	67634703	67634923	221	67634725	7	7.37347	5.423	3.10364	Intergenic	L1Md_A|LINE|L1
NTG	chr1	67670623	67670849	227	67670673	9	9.76158	6.66372	5.26755	Intergenic	L1Md_T|LINE|L1
NTG	chr1	69238940	69239175	236	69239066	11	11.3733	7.38084	6.80084	Intergenic	L1Md_A|LINE|L1	Erbb4	NM_010154
NTG	chr1	69503223	69503577	355	69503403	53	8.52802	2.39862	4.14885	Intergenic	(TTAGGG)n|Simple_repeat|Simple_repeat	Ikzf2	NM_011770
NTG	chr1	71125926	71126130	205	71125957	59	10.2272	2.5331	5.70374	Intron	intron (NM_007525, intron 3 of 10)	Bard1	NM_007525
NTG	chr1	76310261	76310486	226	76310353	7	7.37347	5.423	3.10364	Intergenic	L1Md_A|LINE|L1
NTG	chr1	77781549	77781803	255	77781695	9	9.97828	6.77875	5.4652	Intergenic	L1Md_A|LINE|L1
NTG	chr1	78570212	78570578	367	78570365	35	15.536	4.95984	10.8574	Intergenic	Intergenic	Farsb;Utp14b;Acsl3;Mogat1	NR_102757;NM_001136226;NM_028817;NM_001136222;NR_102758;NM_001001981;NM_011811;NM_026713;NM_001033606;NM_001278075
NTG	chr1	78570675	78570951	277	78570845	24	6.25621	2.8847	2.24651	Intergenic	Intergenic	Farsb;Utp14b;Acsl3;Mogat1	NR_102757;NM_001136226;NM_028817;NM_001136222;NR_102758;NM_001001981;NM_011811;NM_026713;NM_001033606;NM_001278075
NTG	chr1	80601917	80602236	320	80602088	6	6.14427	4.74512	2.14251	Intron	(TTTC)n|Simple_repeat|Simple_repeat	Dock10	NM_175291;NM_001285927
NTG	chr1	81034084	81034283	200	81034137	7	7.37347	5.423	3.10364	Intergenic	(GA)n|Simple_repeat|Simple_repeat	Nyap2	NM_172849
NTG	chr1	82474030	82474295	266	82474289	16	5.04514	2.98574	1.42032	Intron	(TG)n|Simple_repeat|Simple_repeat	Col4a4	NM_007735
NTG	chr1	82700759	82701001	243	82700856	8	7.63555	5.53563	3.33946	Intron	L1Md_F|LINE|L1	Col4a3	NM_007734
NTG	chr1	85046039	85046361	323	85046184	11	10.2729	6.73292	5.74425	Intergenic	L1Md_Gf|LINE|L1	A530032D15Rik	NM_213615
NTG	chr1	85092893	85093113	221	85092977	13	7.24628	4.49846	3.07906	Intron	intron (NM_213615, intron 3 of 6)	A530032D15Rik	NM_213615
NTG	chr1	85308615	85308814	200	85308757	9	8.05708	5.68563	3.72105	Intergenic	Intergenic	Gm7609;C130026I21Rik	NM_175219;NM_001081746;NM_001037909
NTG	chr1	97706457	97706656	200	97706536	8	4.41706	3.50935	1.21359	Intergenic	L1Md_A|LINE|L1	4930598F16Rik	NR_040479
NTG	chr1	98561473	98561672	200	98561528	7	5.75922	4.48861	1.97086	Promoter	L1Md_F3|LINE|L1	4930533P14Rik	NR_040478
NTG	chr1	100741382	100741638	257	100741558	8	6.82411	5.04969	2.71632	Intergenic	L1Md_A|LINE|L1
NTG	chr1	102635468	102635671	204	102635504	54	10.0832	2.62551	5.56635	Intergenic	Intergenic
NTG	chr1	103231500	103231796	297	103231661	8	6.48191	4.83737	2.42644	Intergenic	L1Md_T|LINE|L1
NTG	chr1	103757164	103757363	200	103757243	12	10.5289	6.70537	5.98968	Intergenic	L1Md_F3|LINE|L1
NTG	chr1	104422217	104422479	263	104422354	9	7.93401	5.61077	3.60345	Intergenic	L1Md_A|LINE|L1
NTG	chr1	104499555	104499754	200	104499729	7	6.09534	4.69467	2.14251	Intergenic	L1Md_A|LINE|L1
NTG	chr1	104502527	104502726	200	104502669	6	6.14427	4.74512	2.14251	Intergenic	L1Md_Gf|LINE|L1
NTG	chr1	104898877	104899112	236	104899074	7	5.75922	4.48861	1.97086	Intergenic	L1Md_T|LINE|L1
NTG	chr1	105048908	105049312	405	105049241	8	6.82411	5.04969	2.71632	Intergenic	L1Md_T|LINE|L1
NTG	chr1	109652961	109653165	205	109652997	9	7.93401	5.61077	3.60345	Intergenic	L1Md_T|LINE|L1
NTG	chr1	110305090	110305333	244	110305270	9	9.97828	6.77875	5.4652	Intergenic	L1Md_Gf|LINE|L1
NTG	chr1	112894746	112894945	200	112894833	8	8.65321	6.10087	4.23101	Intergenic	L1Md_F2|LINE|L1	Cdh19	NM_001081386
NTG	chr1	114115077	114115303	227	114115181	9	9.97828	6.77875	5.4652	Intergenic	L1Md_T|LINE|L1
NTG	chr1	117201836	117202082	247	117201964	7	7.37347	5.423	3.10364	Intergenic	L1Md_T|LINE|L1
NTG	chr1	118257938	118258148	211	118258071	11	10.2729	6.73292	5.74425	Intron	L1Md_T|LINE|L1	Cntnap5a	NM_001077425
NTG	chr1	118669971	118670351	381	118670143	12	9.36316	5.98132	4.8935	Intergenic	L1Md_F2|LINE|L1
NTG	chr1	127197083	127197303	221	127197217	7	7.37347	5.423	3.10364	Intergenic	(GAAA)n|Simple_repeat|Simple_repeat	Actr3	NM_001205386;NM_001205385;NM_023735
NTG	chr1	135491054	135491459	406	135491326	36	12.1792	3.85209	7.58134	Intergenic	Intergenic	Lax1;Zc3h11a;Zbed6;Snrpe	NM_001166552;NM_172842;NM_001159649;NM_144530;NM_001276767;NM_009227
NTG	chr1	137638833	137639045	213	137638945	9	7.93401	5.61077	3.60345	Intron	(TG)n|Simple_repeat|Simple_repeat	Csrp1	NM_007791
NTG	chr1	141539672	141540016	345	141539856	12	11.4954	7.29399	6.91875	Intergenic	L1Md_F|LINE|L1	Cfhr1;Gm4788	NM_001029977;NM_015780;NM_001160303;NM_001160304
NTG	chr1	146310685	146310884	200	146310723	8	8.65321	6.10087	4.23101	Intergenic	L1Md_A|LINE|L1	Rgs21	NM_001290269;NR_110891
NTG	chr1	147322500	147322699	200	147322580	9	7.93401	5.61077	3.60345	Intergenic	L1Md_T|LINE|L1
NTG	chr1	148293911	148294188	278	148294109	10	8.6604	5.91234	4.23644	Intergenic	L1Md_A|LINE|L1	Brinp3	NM_001145807;NM_153539
NTG	chr1	156054088	156054398	311	156054218	17	8.17029	4.35925	3.81816	Intergenic	(TG)n|Simple_repeat|Simple_repeat	4930452N14Rik;4930532M18Rik;Zfp648	NR_108050;NM_001204908;NR_040629
NTG	chr1	156054464	156054702	239	156054484	13	4.70334	3.09714	1.36794	Intergenic	(TG)n|Simple_repeat|Simple_repeat	4930452N14Rik;4930532M18Rik;Zfp648	NR_108050;NM_001204908;NR_040629
NTG	chr1	156054797	156055020	224	156054864	14	6.22226	3.77577	2.2144	Intergenic	Intergenic	4930452N14Rik;4930532M18Rik;Zfp648	NR_108050;NM_001204908;NR_040629
NTG	chr1	156188888	156189087	200	156188941	7	5.75922	4.48861	1.97086	Intergenic	L1Md_F2|LINE|L1	4930452N14Rik;4930532M18Rik;Cacna1e	NM_009782;NR_108050;NR_040629
NTG	chr1	158291959	158292163	205	158292061	7	6.4746	4.92056	2.42617	Intergenic	L1Md_F3|LINE|L1	Soat1;Nphs2;Tdrd5	NM_001277730;NM_009230;NM_001134741;NM_130456
NTG	chr1	162353813	162354012	200	162353966	7	7.37347	5.423	3.10364	Intron	L1Md_A|LINE|L1	Rabgap1l	NM_013862
NTG	chr1	164421196	164421395	200	164421281	9	5.2296	3.89928	1.58893	Intergenic	L1Md_T|LINE|L1	Mettl13;Vamp4;Dnm3	NM_001038619;NM_172646;NM_016796;NM_144877
NTG	chr1	167336698	167337036	339	167336860	9	9.97828	6.77875	5.4652	Intron	L1Md_Gf|LINE|L1	Dcaf6	NM_028759
NTG	chr1	167344717	167344924	208	167344834	7	7.37347	5.423	3.10364	Intron	L1Md_F2|LINE|L1	Dcaf6	NM_028759
NTG	chr1	168533207	168533406	200	168533295	8	4.41706	3.50935	1.21359	Intergenic	L1Md_A|LINE|L1	Gm4847;Fmo9	NM_001164312;NM_172844
NTG	chr1	169128762	169128962	201	169128837	8	6.82411	5.04969	2.71632	Intergenic	L1Md_T|LINE|L1	Uck2	NM_030724
NTG	chr1	170540865	170541064	200	170540956	6	6.14427	4.74512	2.14251	Intergenic	L1Md_A|LINE|L1
NTG	chr1	175090679	175090885	207	175090864	9	7.93401	5.61077	3.60345	Intergenic	L1Md_A|LINE|L1	Olfr1406;Olfr1404;Fcer1a;Olfr218;Olfr1408	NM_146763;NM_001001809;NM_146881;NM_010184;NM_146764
NTG	chr1	176190276	176190475	200	176190422	7	7.15101	5.30333	2.99897	Intergenic	L1Md_T|LINE|L1	Spta1;Mptx1;Olfr419	NM_011465;NM_025470;NM_146715
NTG	chr1	176312803	176313002	200	176312930	7	6.4746	4.92056	2.42617	Intergenic	MMERVK10C-int|LTR|ERVK	Olfr417;Olfr220;Olfr414;Mptx1;Olfr248	NM_207694;NM_146761;NM_025470;NM_146714;NM_207137
NTG	chr1	179797763	179797962	200	179797921	6	6.14427	4.74512	2.14251	Intergenic	L1Md_F2|LINE|L1	Adss	NM_007422
NTG	chr1	179862038	179862237	200	179862233	7	7.37347	5.423	3.10364	Intergenic	L1Md_T|LINE|L1	Gm16432	NM_001034899
NTG	chr1	180061016	180061227	212	180061059	7	7.37347	5.423	3.10364	Intergenic	L1Md_F|LINE|L1	Gm16432;Desi2	NM_024282;NM_001034899
NTG	chr1	185976995	185977194	200	185977129	7	7.25359	5.35891	3.08456	Intergenic	L1Md_T|LINE|L1	Dusp10	NM_022019
NTG	chr1	191767542	191767779	238	191767698	8	8.65321	6.10087	4.23101	Intergenic	(CA)n|Simple_repeat|Simple_repeat	Smyd2;Ptpn14	NM_008976;NM_026796
NTG	chr1	192124118	192124359	242	192124314	14	5.34064	3.31837	1.69697	Intergenic	Intergenic
NTG	chr1	194277936	194278143	208	194277967	86	12.5893	2.37743	7.97916	Intron	intron (NM_001038607, intron 10 of 10)	Kcnh1	NM_001038607;NM_010600
NTG	chr1	195053871	195054236	366	195054047	89	14.882	2.56926	10.2161	Intron	(TTAGGG)n|Simple_repeat|Simple_repeat	Hsd11b1	NM_008288;NM_001044751
NTG	chr10	6765191	6765390	200	6765237	9	6.3263	4.60102	2.3016	Intergenic	L1Md_T|LINE|L1	Iyd	NM_027391
NTG	chr10	7983910	7984282	373	7984084	8	6.82411	5.04969	2.71632	Intron	L1Md_T|LINE|L1	Ust	NM_177387
NTG	chr10	9747793	9747997	205	9747861	7	7.37347	5.423	3.10364	Intergenic	L1Md_T|LINE|L1
NTG	chr10	11577423	11577687	265	11577607	9	5.2296	3.89928	1.58893	Intergenic	L1Md_T|LINE|L1
NTG	chr10	11578523	11578841	319	11578703	6	6.14427	4.74512	2.14251	Intergenic	L1Md_T|LINE|L1
NTG	chr10	13175200	13175456	257	13175394	7	5.75922	4.48861	1.97086	Intron	L1Md_F2|LINE|L1	Phactr2	NM_001195065
NTG	chr10	15060929	15061212	284	15061019	9	8.36088	5.86834	3.98927	Intergenic	L1Md_A|LINE|L1
NTG	chr10	19262004	19262203	200	19262109	7	7.37347	5.423	3.10364	Intergenic	IAPEz-int|LTR|ERVK	Il22ra2;Ifngr1	NM_010511;NM_178258
NTG	chr10	19817707	19817906	200	19817797	7	6.90854	5.16929	2.77038	Intron	(GA)n|Simple_repeat|Simple_repeat	Map3k5	NM_008580
NTG	chr10	22521547	22521766	220	22521657	11	12.1098	7.79333	7.51383	Intergenic	L1Md_T|LINE|L1	Mir7663;Tbpl1;Slc2a12;Tcf21	NM_178934;NM_011603;NM_011545;NR_106123
NTG	chr10	27762016	27762239	224	27762111	10	7.30242	5.06112	3.10364	Intergenic	L1Md_T|LINE|L1	Ptprk	NM_008983
NTG	chr10	28662589	28662788	200	28662664	8	7.20556	5.28151	3.03975	Intergenic	L1Md_F|LINE|L1	4930519F09Rik;2310057J18Rik;Themis	NM_178666;NR_033601;NM_026336
NTG	chr10	29159399	29159598	200	29159458	6	4.48408	3.7624	1.26959	Intergenic	L1Md_A|LINE|L1	Rspo3;Echdc1;Rnf146	NM_026518;NM_028351;NM_001110198;NM_025855;NM_001110197;NM_001110196;NM_001110195;NM_001284279
NTG	chr10	29342387	29342602	216	29342473	7	7.37347	5.423	3.10364	Intergenic	L1Md_T|LINE|L1	Rspo3	NM_028351
NTG	chr10	29938207	29938442	236	29938254	10	9.08475	6.17184	4.62779	Intergenic	L1Md_T|LINE|L1	Cenpw	NM_001109747
NTG	chr10	32941823	32942102	280	32942007	6	6.14427	4.74512	2.14251	Intron	TTS (NR_040657)	Trdn	NM_029726
NTG	chr10	33296680	33297009	330	33296879	10	10.0888	6.76577	5.56994	Intron	L1Md_A|LINE|L1	Clvs2	NM_175448
NTG	chr10	35239548	35239828	281	35239664	11	10.2729	6.73292	5.74425	Intergenic	L1Md_T|LINE|L1
NTG	chr10	35690511	35690745	235	35690682	8	8.57709	6.06053	4.19624	Intergenic	L1Md_A|LINE|L1
NTG	chr10	35855149	35855348	200	35855282	6	5.78125	4.54611	1.99177	Intergenic	L1Md_A|LINE|L1
NTG	chr10	36760512	36760711	200	36760670	6	5.36399	4.30549	1.69697	Intergenic	L1Md_A|LINE|L1	Hdac2;Marcks	NM_008538;NM_008229
NTG	chr10	37454364	37454563	200	37454500	8	5.39072	4.14092	1.70816	Intergenic	L1Md_A|LINE|L1
NTG	chr10	37540118	37540326	209	37540300	59	12.4188	2.86419	7.81346	Intergenic	Lx5|LINE|L1
NTG	chr10	45279033	45279232	200	45279176	8	8.65321	6.10087	4.23101	Intergenic	IAPEz-int|LTR|ERVK	Hace1;Lin28b	NM_001031772;NM_172473
NTG	chr10	47159495	47159735	241	47159576	8	8.65321	6.10087	4.23101	Intergenic	L1Md_T|LINE|L1
NTG	chr10	47160101	47160312	212	47160296	8	6.82411	5.04969	2.71632	Intergenic	L1Md_T|LINE|L1
NTG	chr10	47950270	47950515	246	47950393	8	7.63555	5.53563	3.33946	Intergenic	L1Md_T|LINE|L1
NTG	chr10	48451129	48451347	219	48451232	11	9.80735	6.44982	5.31044	Intergenic	(GAA)n|Simple_repeat|Simple_repeat
NTG	chr10	49545994	49546193	200	49546069	7	5.75922	4.48861	1.97086	Intergenic	L1Md_T|LINE|L1	Grik2	NM_010349;NM_001111268
NTG	chr10	51063889	51064088	200	51063963	9	9.97828	6.77875	5.4652	Intergenic	L1Md_A|LINE|L1
NTG	chr10	51166327	51166526	200	51166468	6	5.36399	4.30549	1.69697	Intergenic	L1Md_F2|LINE|L1	Lilrb4;Gp49a	NM_008147;NM_001291892;NM_001291893;NM_001291894;NM_013532
NTG	chr10	52289897	52290096	200	52289952	8	7.20556	5.28151	3.03975	Intergenic	L1Md_F|LINE|L1	Zfa-ps	NR_037920
NTG	chr10	52970327	52970605	279	52970425	9	7.93401	5.61077	3.60345	Intergenic	L1Md_T|LINE|L1	Gm19395;Cep85l;Pln	NM_001141927;NR_038015;NM_023129;NM_001204983
NTG	chr10	53387240	53387481	242	53387367	7	5.75922	4.48861	1.97086	Intron	L1Md_T|LINE|L1	Fam184a	NM_001081428
NTG	chr10	53866537	53866772	236	53866611	8	6.82411	5.04969	2.71632	Intergenic	L1Md_A|LINE|L1	Man1a;Gm16998	NR_038016;NM_008548
NTG	chr10	55222250	55222449	200	55222406	10	8.6604	5.91234	4.23644	Intergenic	L1Md_T|LINE|L1
NTG	chr10	56820683	56820882	200	56820785	7	7.37347	5.423	3.10364	Intergenic	L1Md_T|LINE|L1
NTG	chr10	58186703	58187044	342	58186859	9	6.3263	4.60102	2.3016	Intergenic	L1Md_F2|LINE|L1	BB019430;Sh3rf3;Edar	NM_172788;NM_010100;NR_033565
NTG	chr10	62682096	62682295	200	62682105	6	4.48408	3.7624	1.26959	Intergenic	L1Md_T|LINE|L1	Sirt1;Mypn;Herc4	NM_019812;NM_182992;NM_026101;NM_001159589;NM_030114
NTG	chr10	63127661	63127860	200	63127824	7	7.37347	5.423	3.10364	Intron	L1Md_A|LINE|L1	Ctnna3	NM_177612;NM_001164376
NTG	chr10	64244993	64245192	200	64245003	6	5.54546	4.41163	1.8493	Intron	L1Md_T|LINE|L1	Ctnna3	NM_177612;NM_001164376;NM_001164519
NTG	chr10	66136179	66136533	355	66136443	8	5.39072	4.14092	1.70816	Intergenic	L1Md_A|LINE|L1
NTG	chr10	70345081	70345390	310	70345280	8	7.63555	5.53563	3.33946	Intergenic	L1Md_T|LINE|L1	Bicc1	NM_031397
NTG	chr10	70351449	70351824	376	70351640	8	6.82411	5.04969	2.71632	Intergenic	L1Md_A|LINE|L1	Bicc1	NM_031397
NTG	chr10	71957192	71957533	342	71957358	9	7.93401	5.61077	3.60345	Intergenic	L1Md_T|LINE|L1
NTG	chr10	86642139	86642570	432	86642297	10	7.30242	5.06112	3.10364	Intron	L1Md_A|LINE|L1	1700113H08Rik	NM_029685
NTG	chr10	86865599	86865840	242	86865753	8	8.65321	6.10087	4.23101	Intergenic	L1Md_A|LINE|L1	Ascl1	NM_008553
NTG	chr10	94334643	94334994	352	94334817	60	12.2202	2.8071	7.621	Intron	(CCCTAA)n|Simple_repeat|Simple_repeat	Plxnc1	NM_018797
NTG	chr10	97909228	97909432	205	97909268	8	8.65321	6.10087	4.23101	Intergenic	(GAAA)n|Simple_repeat|Simple_repeat	Gm8633	NR_045179
NTG	chr10	98064252	98064451	200	98064385	9	7.93401	5.61077	3.60345	Intergenic	L1Md_A|LINE|L1
NTG	chr10	98535041	98535240	200	98535132	8	6.82411	5.04969	2.71632	Intergenic	L1Md_T|LINE|L1	Atp2b1;Galnt4;Poc1b	NM_015737;NM_026482;NM_027740
NTG	chr10	99186064	99186263	200	99186116	11	5.16866	3.58545	1.53981	Intergenic	L1Md_A|LINE|L1	Csl;Gm18409;Gm20110	NM_027945;NR_038018;NR_038019
NTG	chr10	101787637	101787910	274	101787659	9	5.2296	3.89928	1.58893	Intron	L1Md_T|LINE|L1	Mgat4c	NM_001162369;NM_001205098;NM_001162368
NTG	chr10	103102345	103102558	214	103102407	8	6.48191	4.83737	2.42644	Intergenic	L1Md_A|LINE|L1
NTG	chr10	105360314	105361111	798	105360824	11	10.2729	6.73292	5.74425	Intergenic	L1Md_A|LINE|L1	Ccdc59;Mettl25	NM_207522;NM_025602
NTG	chr10	112824595	112824834	240	112824707	11	11.3733	7.38084	6.80084	Intergenic	L1Md_A|LINE|L1
NTG	chr10	114973990	114974253	264	114974225	8	6.82411	5.04969	2.71632	Intron	L1Md_A|LINE|L1	Lgr5	NM_010195
NTG	chr10	121549755	121549954	200	121549848	8	6.82411	5.04969	2.71632	Intergenic	L1Md_A|LINE|L1	Gm4489;Srgap1;Gm9079;Tmem5	NM_001242411;NM_153059;NR_027637;NM_001081037;NR_004052
NTG	chr10	125278945	125279144	200	125279069	7	7.37347	5.423	3.10364	Intergenic	L1_Mm|LINE|L1
NTG	chr10	129636700	129636934	235	129636860	8	6.82411	5.04969	2.71632	Intergenic	L1Md_T|LINE|L1	Neurod4;Olfr823;Olfr826;Olfr827;Olfr824;Olfr825	NM_146674;NM_146677;NM_146676;NM_007501;NM_146673;NM_146300
NTG	chr11	7825227	7825632	406	7825342	10	7.30242	5.06112	3.10364	Intergenic	L1Md_T|LINE|L1
NTG	chr11	10168132	10168331	200	10168272	7	7.37347	5.423	3.10364	Intergenic	L1Md_F2|LINE|L1
NTG	chr11	10756027	10756315	289	10756144	7	5.75922	4.48861	1.97086	Intergenic	L1Md_A|LINE|L1
NTG	chr11	12048108	12048307	200	12048155	6	5.951	4.64041	2.14251	Intergenic	L1Md_A|LINE|L1	Cobl	NM_001282994;NM_172496;NM_001282993
NTG	chr11	12540846	12541071	226	12540927	7	7.37347	5.423	3.10364	Intergenic	L1Md_T|LINE|L1
NTG	chr11	13432389	13432641	253	13432482	9	6.59534	4.77281	2.53515	Intergenic	L1Md_F3|LINE|L1
NTG	chr11	17983090	17983289	200	17983127	9	5.2296	3.89928	1.58893	Intergenic	L1Md_T|LINE|L1
NTG	chr11	18678354	18678787	434	18678649	8	5.88955	4.46213	2.09186	Intergenic	L1Md_T|LINE|L1
NTG	chr11	21381909	21382273	365	21382106	8	6.82411	5.04969	2.71632	Intergenic	L1Md_T|LINE|L1	4932414J04Rik;Wdpcp;Mdh1	NR_028259;NM_145425;NM_008618
NTG	chr11	26330458	26330667	210	26330643	7	5.75922	4.48861	1.97086	Intron	L1Md_T|LINE|L1	Fancl	NM_025923;NM_001277273;NR_102382
NTG	chr11	26571050	26571249	200	26571143	8	8.65321	6.10087	4.23101	Intergenic	L1Md_T|LINE|L1	Vrk2	NM_027260;NM_001252447
NTG	chr11	31889839	31890080	242	31889933	10	9.08475	6.17184	4.62779	Intergenic	(TG)n|Simple_repeat|Simple_repeat	4930524B15Rik;Cpeb4;Nsg2	NM_001290681;NM_001290678;NM_026262;NM_001290680;NM_008741;NM_001290676;NM_026252
NTG	chr11	34664964	34665204	241	34665006	7	5.75922	4.48861	1.97086	Intergenic	L1Md_T|LINE|L1	Dock2;Spdl1	NM_027411;NM_033374
NTG	chr11	39832553	39832776	224	39832665	10	9.08475	6.17184	4.62779	Intergenic	(GA)n|Simple_repeat|Simple_repeat
NTG	chr11	40230231	40230430	200	40230286	7	7.37347	5.423	3.10364	Intergenic	L1Md_T|LINE|L1
NTG	chr11	40620355	40620588	234	40620475	8	7.20556	5.28151	3.03975	Intergenic	L1Md_T|LINE|L1	Hmmr;Nudcd2;Ccng1	NM_009831;NM_001290697;NM_026023;NM_013552
NTG	chr11	41696039	41696324	286	41696159	16	16.0127	9.13725	11.3228	Intergenic	L1Md_T|LINE|L1	Gabrg2	NM_008073;NM_177408
NTG	chr11	42594259	42594458	200	42594328	7	7.37347	5.423	3.10364	Intergenic	L1Md_T|LINE|L1
NTG	chr11	46975624	46975823	200	46975660	7	7.37347	5.423	3.10364	Intron	L1Md_F2|LINE|L1	Sgcd	NM_011891
NTG	chr11	47609240	47609455	216	47609321	7	6.09534	4.69467	2.14251	Intergenic	L1Md_A|LINE|L1
NTG	chr11	54140059	54140570	512	54140239	13	15.6566	9.49024	10.975	Intron	intron (NM_001033597, intron 6 of 20)	Acsl6	NM_001033597;NM_144823;NM_001033599;NM_001033598
NTG	chr11	54199360	54199632	273	54199495	9	7.93401	5.61077	3.60345	Intron	L1Md_T|LINE|L1	4930404A10Rik	NM_029105
NTG	chr11	55481840	55482150	311	55482038	9	9.97828	6.77875	5.4652	Intergenic	L1Md_A|LINE|L1	Glra1	NM_020492;NM_001290821
NTG	chr11	56044836	56045051	216	56044883	7	6.4746	4.92056	2.42617	Intergenic	L1Md_A|LINE|L1
NTG	chr11	63462471	63462722	252	63462583	9	7.55076	5.37485	3.27001	Intergenic	L1Md_T|LINE|L1
NTG	chr11	88943011	88943364	354	88943193	37	10.2687	3.28694	5.74408	Intron	(CTGTG)n|Simple_repeat|Simple_repeat	Gm525	NM_001033266
NTG	chr11	90863813	90864012	200	90863860	7	7.37347	5.423	3.10364	Intergenic	L1Md_T|LINE|L1
NTG	chr11	107969007	107969220	214	107969174	8	4.41706	3.50935	1.21359	Intron	L1Md_T|LINE|L1	Prkca	NM_011101
NTG	chr11	121843559	121843856	298	121843734	169	17.1475	2.06416	12.4376	Intergenic	(TTAGGG)n|Simple_repeat|Simple_repeat
NTG	chr12	5632780	5633017	238	5632893	6	5.03536	4.10784	1.41082	Intergenic	L1Md_T|LINE|L1
NTG	chr12	6243471	6243697	227	6243521	8	7.63555	5.53563	3.33946	Intergenic	L1Md_T|LINE|L1
NTG	chr12	6779597	6779814	218	6779689	10	7.30242	5.06112	3.10364	Intergenic	L1Md_A|LINE|L1
NTG	chr12	7119497	7119782	286	7119603	11	10.2729	6.73292	5.74425	Intergenic	L1Md_A|LINE|L1
NTG	chr12	11965918	11966154	237	11965985	7	5.75922	4.48861	1.97086	Intergenic	L1Md_A|LINE|L1	Tubb2a-ps2	NR_003964
NTG	chr12	13768954	13769205	252	13769034	8	6.82411	5.04969	2.71632	Intergenic	L1Md_T|LINE|L1
NTG	chr12	15199840	15200039	200	15199955	8	7.63555	5.53563	3.33946	Intergenic	L1Md_A|LINE|L1
NTG	chr12	15431969	15432170	202	15432019	8	6.82411	5.04969	2.71632	Intergenic	L1Md_T|LINE|L1
NTG	chr12	15445693	15445927	235	15445803	9	9.97828	6.77875	5.4652	Intergenic	(GAAA)n|Simple_repeat|Simple_repeat
NTG	chr12	15633537	15633736	200	15633559	7	7.37347	5.423	3.10364	Intergenic	L1Md_T|LINE|L1
NTG	chr12	16754490	16754854	365	16754672	105	15.8584	2.45123	11.1723	Intron	(TTAGGG)n|Simple_repeat|Simple_repeat	Greb1	NM_015764;NM_001252071
NTG	chr12	18886029	18886228	200	18886059	9	8.36088	5.86834	3.98927	Intergenic	(CA)n|Simple_repeat|Simple_repeat
NTG	chr12	25014467	25014666	200	25014477	6	6.14427	4.74512	2.14251	Intergenic	AT_rich|Low_complexity|Low_complexity
NTG	chr12	28378298	28378524	227	28378439	8	8.6376	6.09263	4.23101	Intergenic	L1Md_F2|LINE|L1
NTG	chr12	29193583	29193899	317	29193783	7	7.37347	5.423	3.10364	Intron	(GAAA)n|Simple_repeat|Simple_repeat	Dcdc2c	NM_001177964
NTG	chr12	31678190	31678448	259	31678329	7	6.90854	5.16929	2.77038	Intergenic	L1Md_T|LINE|L1	Sh3yl1;Acp1;Fam110c;Fam150b	NM_001289480;NM_027828;NM_021330;NM_001159743;NR_110343;NM_013709;NM_001110239
NTG	chr12	36583174	36583373	200	36583194	8	5.39072	4.14092	1.70816	Intergenic	L1Md_T|LINE|L1	Agr3	NM_207531
NTG	chr12	42241562	42241769	208	42241741	68	11.2648	2.5002	6.69789	Intron	Lx4A|LINE|L1	Immp2l	NM_053122
NTG	chr12	43769276	43769654	379	43769536	7	7.37347	5.423	3.10364	Intergenic	L1Md_Gf|LINE|L1
NTG	chr12	45586518	45586717	200	45586601	10	10.6957	7.10777	6.14976	Intron	L1Md_Gf|LINE|L1	Nrcam	NM_176930;NM_001146031
NTG	chr12	46387457	46387656	200	46387493	6	6.14427	4.74512	2.14251	Intergenic	(TTTC)n|Simple_repeat|Simple_repeat
NTG	chr12	50295686	50295908	223	50295784	9	7.20354	5.15797	3.03975	Intergenic	L1Md_F|LINE|L1
NTG	chr12	53213863	53214062	200	53213883	7	6.4746	4.92056	2.42617	Intron	L1Md_T|LINE|L1	Nubpl	NM_029760
NTG	chr12	56735979	56736241	263	56736093	12	9.36316	5.98132	4.8935	Intron	L1Md_T|LINE|L1	Ralgapa1	NM_019994;NM_001286263;NM_001112714;NM_001003719
NTG	chr12	58824401	58824600	200	58824535	9	8.36088	5.86834	3.98927	Intergenic	L1Md_T|LINE|L1
NTG	chr12	59293535	59293734	200	59293598	8	8.65321	6.10087	4.23101	Intergenic	L1Md_T|LINE|L1	Sstr1;Clec14a	NM_009216;NM_025809
NTG	chr12	59593323	59593522	200	59593356	6	6.14427	4.74512	2.14251	Intergenic	L1Md_T|LINE|L1
NTG	chr12	59872619	59872818	200	59872724	9	9.39086	6.46161	4.91452	Intergenic	L1Md_T|LINE|L1
NTG	chr12	60502852	60503051	200	60503011	9	9.39086	6.46161	4.91452	Intergenic	L1Md_A|LINE|L1
NTG	chr12	60503124	60503323	200	60503147	8	7.63555	5.53563	3.33946	Intergenic	L1Md_A|LINE|L1
NTG	chr12	60554517	60554716	200	60554596	6	6.14427	4.74512	2.14251	Intergenic	L1Md_F2|LINE|L1
NTG	chr12	61545017	61545216	200	61545057	7	7.35966	5.41567	3.10364	Intergenic	L1Md_A|LINE|L1
NTG	chr12	63161173	63161374	202	63161312	8	5.39072	4.14092	1.70816	Intergenic	L1Md_A|LINE|L1
NTG	chr12	64271037	64271381	345	64271186	11	8.31567	5.52122	3.95108	Intergenic	Lx6|LINE|L1
NTG	chr12	65850600	65850857	258	65850776	8	7.20556	5.28151	3.03975	Intergenic	GA-rich|Low_complexity|Low_complexity
NTG	chr12	72863452	72863750	299	72863626	9	7.93401	5.61077	3.60345	Intergenic	(GAAA)n|Simple_repeat|Simple_repeat	Daam1	NM_026102;NM_172464
NTG	chr12	75135581	75135788	208	75135682	9	9.97828	6.77875	5.4652	Intron	intron (NM_172804, intron 1 of 6)	Syt16	NM_172804
NTG	chr12	75152815	75153014	200	75152985	7	5.75922	4.48861	1.97086	Intron	L1Md_T|LINE|L1	Syt16	NM_172804
NTG	chr12	82012985	82013280	296	82013033	8	8.12707	5.81545	3.77667	Intergenic	L1Md_F2|LINE|L1	Gm20337;Srsf5;Slc10a1;1700052I22Rik;4933426M11Rik	NM_001079694;NM_001079695;NM_009159;NR_045057;NM_001242419;NR_033786;NM_178682;NM_001177561;NM_011387
NTG	chr12	85568687	85568886	200	85568741	8	8.65321	6.10087	4.23101	Intergenic	GA-rich|Low_complexity|Low_complexity	Pnma1;Elmsan1;Zfp410;Ptgr2;Dnal1	NM_001163502;NM_001252582;NM_028821;NM_001163501;NM_027438;NR_045546;NM_144833;NR_045615;NM_029880;NM_001252626;NM_001252625;NM_001252583
NTG	chr12	89152721	89152977	257	89152837	7	7.37347	5.423	3.10364	Intergenic	L1_Mm|LINE|L1	BB287469;Gm2016;Gm2022;Gm2042;Gm1995	NM_001177573;NM_001270792;NM_001270793;NM_001177574;NR_033562;NM_001122662
NTG	chr12	89612489	89612688	200	89612523	7	7.37347	5.423	3.10364	Intron	(TTTC)n|Simple_repeat|Simple_repeat	3200001D21Rik;Adck1	NM_028105;NM_001277296;NR_045888;NM_001277297
NTG	chr12	93602917	93603139	223	93602974	8	6.82411	5.04969	2.71632	Intergenic	L1Md_T|LINE|L1
NTG	chr12	94815359	94815746	388	94815550	55	11.5136	2.83187	6.93629	Intergenic	(TTAGGG)n|Simple_repeat|Simple_repeat
NTG	chr12	94970475	94970674	200	94970556	7	5.75922	4.48861	1.97086	Intergenic	L1Md_T|LINE|L1
NTG	chr12	95860468	95860667	200	95860520	9	5.2296	3.89928	1.58893	Intergenic	L1Md_T|LINE|L1
NTG	chr12	96091322	96091521	200	96091413	6	4.74446	3.92754	1.36794	Intergenic	L1Md_T|LINE|L1
NTG	chr12	97751282	97751502	221	97751388	8	8.65321	6.10087	4.23101	Intergenic	L1Md_T|LINE|L1
NTG	chr12	102973315	102973514	200	102973451	7	6.09534	4.69467	2.14251	Intergenic	L1Md_F2|LINE|L1	Fbln5;Tc2n	NM_011812;NM_001286364;NM_001082976;NM_028924
NTG	chr12	103648904	103649103	200	103648962	7	7.37347	5.423	3.10364	Intron	L1Md_T|LINE|L1	Lgmn	NM_011175
NTG	chr12	119624846	119625146	301	119625005	7	5.75922	4.48861	1.97086	Intergenic	L1Md_A|LINE|L1	Sp4	NM_009239;NM_001166385
NTG	chr12	120251190	120251560	371	120251474	9	9.39086	6.46161	4.91452	Intergenic	L1Md_A|LINE|L1	Abcb5	NM_029961
NTG	chr12	120365523	120365737	215	120365668	6	5.36399	4.30549	1.69697	Intergenic	L1Md_F2|LINE|L1	Itgb8	NM_177290
NTG	chr12	120756941	120757164	224	120757099	8	6.82411	5.04969	2.71632	Intergenic	L1Md_T|LINE|L1	Macc1	NM_001163136
NTG	chr13	4073023	4073222	200	4073072	9	7.93401	5.61077	3.60345	Intron	L1Md_Gf|LINE|L1	Akr1c14	NM_134072
NTG	chr13	7809783	7810044	262	7809862	7	4.49972	3.68081	1.26959	Intergenic	L1Md_T|LINE|L1
NTG	chr13	8167712	8167987	276	8167819	9	8.36088	5.86834	3.98927	Intergenic	L1Md_T|LINE|L1	Adarb2	NM_001289530;NR_110345;NM_052977
NTG	chr13	10604866	10605079	214	10604899	9	8.84168	6.1507	4.40595	Intergenic	L1Md_A|LINE|L1
NTG	chr13	10773442	10773712	271	10773549	8	6.82411	5.04969	2.71632	Intergenic	L1Md_F2|LINE|L1
NTG	chr13	11228182	11228504	323	11228314	8	8.12707	5.81545	3.77667	Intergenic	L1Md_F|LINE|L1
NTG	chr13	14658415	14658614	200	14658524	8	6.48191	4.83737	2.42644	Intergenic	L1Md_T|LINE|L1	Psma2;Mrpl32;Hecw1;AW209491	NM_001104646;NM_008944;NM_029271;NM_134067;NM_001081348
NTG	chr13	19407578	19407858	281	19407704	12	11.4954	7.29399	6.91875	Intergenic	L1Md_A|LINE|L1	Stard3nl	NM_024270
NTG	chr13	20765131	20765330	200	20765188	8	7.20556	5.28151	3.03975	Intergenic	L1Md_A|LINE|L1	Elmo1	NM_080288;NM_198093
NTG	chr13	23506003	23506350	348	23506317	8	6.82411	5.04969	2.71632	Intergenic	Intergenic	Abt1;C230035I16Rik;Btn1a1;Btn2a2;Zfp322a	NM_013483;NM_172586;NM_001289614;NM_013924;NM_001286155;NM_001289615;NM_175938;NM_001111107;NM_001286156;NR_015492
NTG	chr13	29330081	29330335	255	29330189	7	5.75922	4.48861	1.97086	Intergenic	Intergenic	Cdkal1	NM_144536
NTG	chr13	33697046	33697322	277	33697216	11	8.31567	5.52122	3.95108	Intergenic	L1Md_F2|LINE|L1	Serpinb6d	NM_001300892;NM_001076790
NTG	chr13	33976319	33976531	213	33976449	9	7.55076	5.37485	3.27001	Intron	L1Md_F2|LINE|L1	Serpinb6c	NM_148942
NTG	chr13	35147975	35148242	268	35148126	6	6.14427	4.74512	2.14251	Intergenic	L1Md_Gf|LINE|L1	Eci3;Eci2	NM_026947;NM_011868;NM_001110331;NR_073427
NTG	chr13	42119678	42119877	200	42119814	8	7.63555	5.53563	3.33946	Intergenic	(GAA)n|Simple_repeat|Simple_repeat	Hivep1	NM_007772
NTG	chr13	42223819	42224031	213	42223910	9	7.93401	5.61077	3.60345	Intron	L1Md_F2|LINE|L1	Hivep1	NM_007772
NTG	chr13	48395520	48395719	200	48395659	8	6.82411	5.04969	2.71632	Intergenic	L1Md_T|LINE|L1	A330033J07Rik;Id4;A330048O09Rik	NR_045162;NR_102303;NM_031166
NTG	chr13	50229833	50230056	224	50229962	6	6.14427	4.74512	2.14251	Intergenic	L1Md_A|LINE|L1
NTG	chr13	50903706	50903916	211	50903786	9	7.55076	5.37485	3.27001	Intergenic	L1Md_A|LINE|L1	4930518P08Rik	NR_045364
NTG	chr13	60982236	60982435	200	60982392	6	6.14427	4.74512	2.14251	Intergenic	L1Md_A|LINE|L1	Ctla2a;Ctla2b;Tpbpb;4930486L24Rik;Tpbpa;BC051665;Ctsll3	NM_001145801;NM_001145799;NM_027344;NM_007796;NM_026429;NM_007797;NM_199148;NM_178098;NM_009411
NTG	chr13	67515932	67516263	332	67516066	14	17.1567	10.1681	12.4465	Intron	intron (NM_177811, intron 1 of 3)	Zfp459	NM_177811
NTG	chr13	68462333	68462595	263	68462456	9	9.97828	6.77875	5.4652	Intergenic	L1Md_A|LINE|L1
NTG	chr13	69383076	69383375	300	69383199	9	9.39086	6.46161	4.91452	Intergenic	(GAAA)n|Simple_repeat|Simple_repeat
NTG	chr13	70532795	70533031	237	70532947	8	6.82411	5.04969	2.71632	Intergenic	L1Md_T|LINE|L1
NTG	chr13	71063799	71064040	242	71063972	8	5.39072	4.14092	1.70816	Intergenic	L1Md_T|LINE|L1	8030423J24Rik;Adamts16	NM_029873;NM_172053
NTG	chr13	73165089	73165288	200	73165239	7	7.37347	5.423	3.10364	Intergenic	L1Md_A|LINE|L1
NTG	chr13	74665923	74666629	707	74666320	78	23.0018	3.79956	18.2252	Intergenic	(CACAG)n|Simple_repeat|Simple_repeat	Zfp825	NM_146231
NTG	chr13	74667349	74667698	350	74667530	102	17.6293	2.64503	12.9122	Intergenic	(CACAG)n|Simple_repeat|Simple_repeat	Zfp825	NM_146231
NTG	chr13	74667820	74668175	356	74668002	101	15.8031	2.49409	11.1181	Intergenic	(CACAG)n|Simple_repeat|Simple_repeat	Zfp825	NM_146231
NTG	chr13	76859327	76859526	200	76859493	10	5.17007	3.7216	1.53986	Intron	L1Md_T|LINE|L1	Mctp1	NM_030174
NTG	chr13	78276444	78276738	295	78276557	7	6.4746	4.92056	2.42617	Intron	L1Md_T|LINE|L1	Fam172a	NM_138312;NR_028109;NM_001163420;NM_001163419
NTG	chr13	79106221	79106481	261	79106382	9	7.93401	5.61077	3.60345	Intergenic	L1Md_F3|LINE|L1
NTG	chr13	80701928	80702198	271	80702031	8	7.63555	5.53563	3.33946	Intergenic	L1Md_T|LINE|L1
NTG	chr13	82666405	82666604	200	82666445	7	5.75922	4.48861	1.97086	Intergenic	L1Md_A|LINE|L1
NTG	chr13	84584431	84584680	250	84584587	6	6.14427	4.74512	2.14251	Intergenic	L1Md_T|LINE|L1
NTG	chr13	86826413	86826612	200	86826444	7	7.37347	5.423	3.10364	Intergenic	L1Md_A|LINE|L1
NTG	chr13	90184184	90184383	200	90184261	11	8.99912	5.94951	4.55485	Intron	L1Md_T|LINE|L1	Xrcc4	NM_028012
NTG	chr13	90185560	90185794	235	90185599	7	7.37347	5.423	3.10364	Intron	L1Md_T|LINE|L1	Xrcc4	NM_028012
NTG	chr13	91472322	91472521	200	91472479	8	8.65321	6.10087	4.23101	Intergenic	L1Md_A|LINE|L1	A830009L08Rik	NR_045161
NTG	chr13	93647413	93647612	200	93647561	6	6.14427	4.74512	2.14251	Intergenic	L1Md_F2|LINE|L1	Thbs4;Mtx3	NM_001162945;NM_011582
NTG	chr13	94054419	94054619	201	94054507	8	8.65321	6.10087	4.23101	Intergenic	L1Md_T|LINE|L1	Homer1;Papd4	NM_011982;NM_152134;NM_001284189;NM_133905;NM_147176
NTG	chr13	95020472	95020683	212	95020620	9	9.97828	6.77875	5.4652	Intron	intron (NM_029153, intron 2 of 8)	Scamp1	NM_029153
NTG	chr13	101695842	101696215	374	101696124	8	8.12707	5.81545	3.77667	Intergenic	L1Md_A|LINE|L1	Slc30a5	NM_022885
NTG	chr13	103156424	103156730	307	103156534	8	8.12707	5.81545	3.77667	Intergenic	L1Md_A|LINE|L1
NTG	chr13	103156879	103157078	200	103157002	9	6.88656	4.95792	2.77038	Intergenic	L1Md_A|LINE|L1
NTG	chr13	103840127	103840326	200	103840197	8	8.65321	6.10087	4.23101	Intron	intron (NM_175171, intron 3 of 28)	Mast4	NM_175171
NTG	chr13	107167612	107167811	200	107167747	7	7.37347	5.423	3.10364	Intergenic	L1Md_A|LINE|L1
NTG	chr13	107560512	107560711	200	107560551	8	8.65321	6.10087	4.23101	Intergenic	L1_Mm|LINE|L1	Ipo11	NM_029665
NTG	chr13	111940697	111940959	263	111940867	8	6.82411	5.04969	2.71632	Intergenic	L1_Mus1|LINE|L1	3110015C05Rik	NR_045908
NTG	chr13	111999588	111999829	242	111999681	10	9.08475	6.17184	4.62779	Intergenic	GA-rich|Low_complexity|Low_complexity	3110015C05Rik;Actbl2	NM_175497;NR_045908
NTG	chr13	113195819	113196018	200	113195943	7	7.37347	5.423	3.10364	Intergenic	(TG)n|Simple_repeat|Simple_repeat	Il6st;Ankrd55	NM_001168403;NM_029898;NM_010560;NM_001168404;NM_001168405
NTG	chr13	116982972	116983331	360	116983151	95	16.3253	2.62337	11.6292	Intergenic	(CCCTAA)n|Simple_repeat|Simple_repeat
NTG	chr13	119953045	119953244	200	119953100	7	7.37347	5.423	3.10364	Intergenic	L1Md_F2|LINE|L1
NTG	chr14	4673840	4674043	204	4673978	8	6.82411	5.04969	2.71632	Intergenic	L1Md_T|LINE|L1	Gm3264	NM_001242945
NTG	chr14	5815298	5815676	379	5815431	9	7.93401	5.61077	3.60345	Intergenic	L1Md_T|LINE|L1
NTG	chr14	6127340	6127539	200	6127376	8	8.12707	5.81545	3.77667	Intergenic	L1Md_T|LINE|L1
NTG	chr14	7157839	7158039	201	7157954	10	9.08475	6.17184	4.62779	Intergenic	L1Md_T|LINE|L1
NTG	chr14	7158127	7158326	200	7158197	6	5.36399	4.30549	1.69697	Intergenic	L1Md_T|LINE|L1
NTG	chr14	8151822	8152021	200	8152007	6	5.74046	4.52313	1.97086	Intergenic	L1_Mm|LINE|L1	4933406F09Rik;Gm5797	NR_015568;NM_001025085
NTG	chr14	8311005	8311204	200	8311073	7	7.00325	5.22208	2.85874	Intergenic	L1_Mm|LINE|L1	4933406F09Rik;Gm3558	NM_001270842;NR_015568
NTG	chr14	8515968	8516208	241	8516088	9	9.39086	6.46161	4.91452	Intergenic	L1Md_F2|LINE|L1
NTG	chr14	8703133	8704221	1089	8704025	63	28.9786	5.72976	24.1476	Intron	intron (NM_134080, intron 3 of 45)	Flnb	NM_134080;NM_001081427
NTG	chr14	11351329	11351530	202	11351363	8	7.63555	5.53563	3.33946	Intron	L1Md_T|LINE|L1	Fhit	NM_010210
NTG	chr14	11532428	11532660	233	11532544	8	8.65321	6.10087	4.23101	Intron	(GGAGAA)n|Simple_repeat|Simple_repeat	Fhit	NM_010210
NTG	chr14	16376451	16376774	324	16376550	8	6.82411	5.04969	2.71632	Intergenic	Intergenic
NTG	chr14	16391374	16391577	204	16391518	9	9.97828	6.77875	5.4652	Intergenic	L1Md_F3|LINE|L1
NTG	chr14	17859104	17859349	246	17859195	9	7.93401	5.61077	3.60345	Intron	L1Md_T|LINE|L1	Rarb	NM_001289761;NM_001289760
NTG	chr14	17868895	17869331	437	17869229	7	7.37347	5.423	3.10364	Intron	L1Md_F2|LINE|L1	Rarb	NM_001289761;NM_001289760
NTG	chr14	29000281	29000740	460	29000340	10	9.08475	6.17184	4.62779	Intron	L1Md_F|LINE|L1	Erc2	NM_177814
NTG	chr14	30734787	30735013	227	30734882	9	7.93401	5.61077	3.60345	Intergenic	L1Md_F2|LINE|L1	Chdh;Mir6947;Actr8;Il17rb;Selk	NM_001136240;NM_019583;NM_019979;NM_172264;NR_105912;NM_027493
NTG	chr14	33323694	33323965	272	33323817	13	7.65139	4.73658	3.35401	Promoter	Intergenic	Ercc6	NM_001081221
NTG	chr14	39353684	39353883	200	39353760	8	8.65321	6.10087	4.23101	Intron	L1Md_T|LINE|L1	Nrg3	NM_001190188;NM_008734;NM_001190187
NTG	chr14	40364957	40365289	333	40365098	8	6.17212	4.64218	2.16517	Intergenic	L1Md_A|LINE|L1	Nrg3	NM_001190188;NM_008734;NM_001190187
NTG	chr14	41357092	41357291	200	41357174	7	7.37347	5.423	3.10364	Intergenic	(GAAA)n|Simple_repeat|Simple_repeat
NTG	chr14	42343689	42343888	200	42343750	7	6.43443	4.897	2.40548	Intergenic	L1Md_F2|LINE|L1
NTG	chr14	42959725	42959935	211	42959811	8	8.12707	5.81545	3.77667	Intergenic	L1Md_A|LINE|L1
NTG	chr14	43304727	43304949	223	43304802	11	8.99912	5.94951	4.55485	Intergenic	(GAAA)n|Simple_repeat|Simple_repeat
NTG	chr14	43405685	43405884	200	43405737	9	9.45027	6.49444	4.97222	Intergenic	Intergenic
NTG	chr14	43592922	43593161	240	43593082	9	7.55076	5.37485	3.27001	Intergenic	L1_Mur1|LINE|L1	Gm10377	NM_001244671
NTG	chr14	44349421	44349662	242	44349483	8	6.82411	5.04969	2.71632	Intergenic	L1_Mur1|LINE|L1	Ear1	NM_007894
NTG	chr14	47958614	47958813	200	47958774	7	6.90854	5.16929	2.77038	Intergenic	(GA)n|Simple_repeat|Simple_repeat	Lgals3;Socs4;Wdhd1;Mapk1ip1l;Dlgap5	NM_080843;NM_178684;NM_010705;NM_001145953;NM_144553;NM_172598
NTG	chr14	50668292	50668496	205	50668354	8	8.6376	6.09263	4.23101	Intergenic	L1Md_T|LINE|L1	Olfr725;Olfr724;Olfr727;Olfr726;Olfr729;Olfr728	NM_146319;NM_146316;NM_146317;NM_146492;NM_001011809;NM_146278
NTG	chr14	54570742	54570941	200	54570787	6	6.14427	4.74512	2.14251	Intergenic	L1Md_T|LINE|L1
NTG	chr14	60064542	60064831	290	60064643	9	6.3263	4.60102	2.3016	Promoter	intron (NM_026908, intron 1 of 10)	Setdb2	NM_001081024
NTG	chr14	60604855	60605054	200	60604957	6	5.74046	4.52313	1.97086	Intron	L1Md_T|LINE|L1	Atp8a2	NM_015803
NTG	chr14	62729888	62730146	259	62730014	7	5.75922	4.48861	1.97086	Intergenic	L1Md_F2|LINE|L1
NTG	chr14	69327055	69327314	260	69327176	11	10.2729	6.73292	5.74425	Intergenic	L1Md_A|LINE|L1	Adam28	NM_010082;NM_001048175;NR_102399;NM_183366
NTG	chr14	69729641	69729840	200	69729704	6	6.14427	4.74512	2.14251	Intergenic	L1Md_A|LINE|L1	Stc1;1700092C10Rik;Nkx2-6;Nkx3-1	NM_010921;NM_009285;NR_045931;NM_010920
NTG	chr14	69779935	69780144	210	69780109	89	12.536	2.33464	7.92845	Intergenic	Intergenic	1700092C10Rik;Nkx2-6;Slc25a37;Nkx3-1	NM_026331;NM_010921;NR_045931;NM_010920
NTG	chr14	74465734	74465938	205	74465775	54	10.0832	2.62551	5.56635	Intergenic	Intergenic
NTG	chr14	79617433	79617646	214	79617526	9	6.3263	4.60102	2.3016	Intron	(TTTC)n|Simple_repeat|Simple_repeat	Zfp957	NM_001033215
NTG	chr14	82482714	82483067	354	82482906	8	8.65321	6.10087	4.23101	Intergenic	L1Md_T|LINE|L1
NTG	chr14	83248133	83248399	267	83248297	10	10.9643	7.25445	6.40826	Intergenic	L1Md_A|LINE|L1
NTG	chr14	86598677	86599067	391	86598886	155	11.6543	1.82484	7.07226	Intergenic	(TTAGGG)n|Simple_repeat|Simple_repeat	4930529K09Rik	NR_040457
NTG	chr14	88053846	88054165	320	88053975	10	10.0888	6.76577	5.56994	Intergenic	(TTTC)n|Simple_repeat|Simple_repeat
NTG	chr14	89094193	89094543	351	89094362	11	6.97193	4.67914	2.82963	Intergenic	L1Md_T|LINE|L1
NTG	chr14	91310836	91311050	215	91311013	93	13.359	2.36637	8.72905	Intergenic	Intergenic
NTG	chr14	91527238	91527530	293	91527368	11	10.2729	6.73292	5.74425	Intergenic	L1Md_T|LINE|L1
NTG	chr14	94514175	94514404	230	94514244	9	5.2296	3.89928	1.58893	Intergenic	(TTCTCC)n|Simple_repeat|Simple_repeat
NTG	chr14	97433959	97434158	200	97433982	7	5.75922	4.48861	1.97086	Intergenic	L1Md_A|LINE|L1
NTG	chr14	103811159	103811426	268	103811235	7	7.37347	5.423	3.10364	Intergenic	L1Md_T|LINE|L1	Mycbp2	NM_207215
NTG	chr14	105446130	105446329	200	105446208	9	7.93401	5.61077	3.60345	Intergenic	L1Md_A|LINE|L1	D130009I18Rik;Rbm26;Gm17066	NR_015593;NM_134077;NR_040628
NTG	chr14	106705435	106705685	251	106705549	10	11.3444	7.45662	6.77284	Intergenic	L1Md_T|LINE|L1
NTG	chr14	110255470	110255669	200	110255504	6	6.14427	4.74512	2.14251	Intergenic	L1Md_T|LINE|L1
NTG	chr14	110950823	110951022	200	110950934	8	6.82411	5.04969	2.71632	Intergenic	L1Md_F2|LINE|L1
NTG	chr14	116630635	116630904	270	116630772	9	5.2296	3.89928	1.58893	Intron	L1Md_T|LINE|L1	Gpc5	NM_175500
NTG	chr14	117659091	117659290	200	117659205	6	6.14427	4.74512	2.14251	Intron	L1Md_T|LINE|L1	Gpc6	NM_011821;NM_001079844
NTG	chr14	120757217	120757416	200	120757328	8	8.65321	6.10087	4.23101	Intron	intron (NM_175341, intron 2 of 8)	Mbnl2	NM_207515;NM_175341
NTG	chr14	122922916	122923170	255	122923074	10	7.30242	5.06112	3.10364	Intergenic	L1Md_T|LINE|L1	Gm5089;Zic5;Zic2;Pcca;2610035F20Rik	NM_009574;NM_022987;NR_033325;NR_045046;NR_033326;NM_144844
NTG	chr14	123945070	123945269	200	123945161	8	8.65321	6.10087	4.23101	Intron	L1Md_A|LINE|L1	Nalcn	NM_177393
NTG	chr15	6843771	6844015	245	6843872	8	6.82411	5.04969	2.71632	Intergenic	L1Md_A|LINE|L1	Rictor;Osmr	NM_030168;NM_011019
NTG	chr15	7228271	7228485	215	7228341	11	11.3733	7.38084	6.80084	Intron	L1Md_T|LINE|L1	Egflam	NM_178748;NM_001289496;NM_001289498
NTG	chr15	9325498	9325697	200	9325532	8	7.20556	5.28151	3.03975	Intergenic	L1Md_T|LINE|L1	Ugt3a2;Capsl;Ugt3a1	NM_029341;NM_144845;NM_207216
NTG	chr15	10740878	10741253	376	10740969	7	5.75922	4.48861	1.97086	Intergenic	L1Md_T|LINE|L1	Gm19276;4930556M19Rik;Rai14	NR_040357;NR_045065;NR_045064;NR_045063;NM_001166408;NM_030690
NTG	chr15	11358753	11358955	203	11358803	18	5.74895	3.1225	1.97086	Intergenic	(TG)n|Simple_repeat|Simple_repeat	Tars;Adamts12	NM_033074;NM_175501
NTG	chr15	14101277	14101476	200	14101435	9	6.88656	4.95792	2.77038	Intergenic	L1Md_Gf|LINE|L1
NTG	chr15	14661579	14661870	292	14661739	7	7.37347	5.423	3.10364	Intergenic	L1Md_A|LINE|L1
NTG	chr15	22626538	22626737	200	22626596	6	4.74446	3.92754	1.36794	Intergenic	L1Md_T|LINE|L1	Gm5803	NM_001165971
NTG	chr15	22739931	22740138	208	22740053	8	8.65321	6.10087	4.23101	Intergenic	L1Md_T|LINE|L1	Gm5803	NM_001165971
NTG	chr15	22784442	22784741	300	22784609	9	7.93401	5.61077	3.60345	Intergenic	L1Md_Gf|LINE|L1
NTG	chr15	23224180	23224417	238	23224350	8	8.65321	6.10087	4.23101	Intron	L1Md_T|LINE|L1	Cdh18	NM_001081299
NTG	chr15	24605177	24605376	200	24605228	8	6.82411	5.04969	2.71632	Intergenic	L1Md_F2|LINE|L1
NTG	chr15	29401744	29401943	200	29401875	6	5.74046	4.52313	1.97086	Intergenic	L1Md_F2|LINE|L1
NTG	chr15	33814825	33815024	200	33814901	7	5.75922	4.48861	1.97086	Intergenic	L1Md_T|LINE|L1
NTG	chr15	37792020	37792219	200	37792116	6	5.36399	4.30549	1.69697	Intergenic	L1Md_T|LINE|L1	Rrm2b;Ncald	NM_134094;NM_199476;NM_001170866
NTG	chr15	39533650	39533849	200	39533662	7	5.75922	4.48861	1.97086	Intergenic	L1Md_T|LINE|L1	Dpys;Dcstamp;Gm16291;Rims2	NM_053271;NM_029422;NM_022722;NM_001256384;NM_001289512;NM_001289513;NM_001289506;NM_001256383;NM_001256382;NM_001164466;NM_001289508;NR_045788
NTG	chr15	39922955	39923340	386	39923148	9	6.3263	4.60102	2.3016	Intergenic	L1Md_T|LINE|L1	9330182O14Rik	NM_001256056
NTG	chr15	43353764	43354032	269	43353847	7	7.37347	5.423	3.10364	Intron	L1Md_A|LINE|L1	Emc2	NM_025736
NTG	chr15	43845854	43846053	200	43845914	10	8.27568	5.67377	3.91576	Intergenic	L1Md_T|LINE|L1
NTG	chr15	43846782	43846981	200	43846869	6	6.14427	4.74512	2.14251	Intergenic	L1Md_T|LINE|L1
NTG	chr15	46721154	46721378	225	46721187	8	6.82411	5.04969	2.71632	Intergenic	L1Md_A|LINE|L1
NTG	chr15	50881672	50881992	321	50881907	7	5.75922	4.48861	1.97086	Intergenic	L1Md_A|LINE|L1
NTG	chr15	51857626	51857928	303	51857758	12	10.5289	6.70537	5.98968	Intergenic	L1Md_T|LINE|L1	Aard;Rad21	NM_009009;NM_175503
NTG	chr15	52706133	52706332	200	52706243	8	6.48191	4.83737	2.42644	Intergenic	L1Md_A|LINE|L1
NTG	chr15	53665166	53665365	200	53665330	6	5.36399	4.30549	1.69697	Intron	L1Md_T|LINE|L1	Samd12	NM_177225
NTG	chr15	54507123	54507322	200	54507256	8	7.63555	5.53563	3.33946	Intergenic	L1Md_T|LINE|L1	Nov;Mal2	NM_178920;NM_010930
NTG	chr15	56370445	56370644	200	56370591	7	7.37347	5.423	3.10364	Intergenic	L1Md_F2|LINE|L1
NTG	chr15	57112336	57112535	200	57112506	6	6.14427	4.74512	2.14251	Intron	L1Md_T|LINE|L1	Slc22a22	NM_172378
NTG	chr15	57246587	57246792	206	57246660	7	6.4746	4.92056	2.42617	Intron	L1Md_A|LINE|L1	Slc22a22	NM_172378
NTG	chr15	62961089	62961340	252	62961260	8	6.82411	5.04969	2.71632	Intergenic	L1Md_A|LINE|L1
NTG	chr15	63163346	63163545	200	63163404	6	6.04011	4.68904	2.14251	Intergenic	L1Md_T|LINE|L1	Gm20740	NR_045279
NTG	chr15	65106263	65106559	297	65106368	8	8.12707	5.81545	3.77667	Intergenic	L1Md_T|LINE|L1
NTG	chr15	67101978	67102278	301	67102094	9	8.36088	5.86834	3.98927	Intron	L1Md_T|LINE|L1	1700012I11Rik	NR_045140
NTG	chr15	68815618	68815860	243	68815746	10	11.3444	7.45662	6.77284	Intron	L1Md_T|LINE|L1	Khdrbs3	NM_010158
NTG	chr15	71488667	71488950	284	71488798	6	5.74046	4.52313	1.97086	Intron	L1Md_A|LINE|L1	Fam135b	NM_177819
NTG	chr15	74916575	74916945	371	74916844	120	6.05787	1.58189	2.14251	Intergenic	B1_Mm|SINE|Alu	Ly6c1;Ly6a;Ly6c2	NM_010741;NM_001271416;NM_001271417;NM_001271418;NM_001271419;NM_001252055;NM_001252056;NM_001252057;NM_001271446;NM_001252058;NM_001099217;NM_010738
NTG	chr15	77381481	77381829	349	77381655	9	7.93401	5.61077	3.60345	Intergenic	L1Md_T|LINE|L1	1700025B11Rik;Apol10a;Apol11a;Gm8221;Apol7c;Apol10b;Apol11b	NM_175391;NR_040310;NR_033577;NM_001177533;NM_177820;NM_177744;NM_001143686
NTG	chr15	98160487	98160835	349	98160765	7	7.37347	5.423	3.10364	Intergenic	L1Md_A|LINE|L1	Zfp641;Olfr283;Olfr286;Olfr284;Olfr285;H1fnt;1700031M16Rik;Olfr257	NM_001011779;NM_001011778;NM_207554;NM_147036;NM_173769;NM_027304;NR_015496;NM_146281
NTG	chr16	3350081	3350299	219	3350260	76	25.3726	4.22837	20.5759	Intergenic	(TTTC)n|Simple_repeat|Simple_repeat
NTG	chr16	5709268	5709477	210	5709301	72	13.2995	2.68317	8.671	Intergenic	(CCCTAA)n|Simple_repeat|Simple_repeat
NTG	chr16	8255676	8255875	200	8255722	7	7.37347	5.423	3.10364	Intergenic	L1Md_T|LINE|L1
NTG	chr16	14442035	14442234	200	14442086	8	5.39072	4.14092	1.70816	Intron	(TTC)n|Simple_repeat|Simple_repeat	Abcc1	NM_008576
NTG	chr16	15760774	15760973	200	15760892	9	9.97828	6.77875	5.4652	Intron	intron (NM_011159, intron 54 of 85)	Prkdc	NM_011159
NTG	chr16	19735502	19735804	303	19735623	7	6.4746	4.92056	2.42617	Intergenic	L1Md_T|LINE|L1	B3gnt5;Lamp3	NM_177356;NM_001159407;NM_001159408;NM_054052
NTG	chr16	23410234	23410433	200	23410323	8	8.65321	6.10087	4.23101	Intergenic	(TTTC)n|Simple_repeat|Simple_repeat	Rtp1;Masp1;St6gal1	NM_001252506;NM_001252505;NM_145933;NM_008555;NM_001004151
NTG	chr16	26225649	26225965	317	26225839	7	6.95553	5.19555	2.81559	Intergenic	L1Md_A|LINE|L1
NTG	chr16	26226368	26226576	209	26226520	7	6.4746	4.92056	2.42617	Intergenic	L1Md_A|LINE|L1
NTG	chr16	26496749	26497068	320	26496939	14	7.51025	4.48181	3.23399	Intergenic	Intergenic	Il1rap;Cldn16;Tmem207	NM_001101640;NM_053241;NM_008364;NM_001159318;NM_134103;NM_001159317
NTG	chr16	26497137	26497683	547	26497514	18	15.2804	8.15489	10.6071	Intergenic	Intergenic	Il1rap;Cldn16;Tmem207	NM_001101640;NM_053241;NM_008364;NM_001159318;NM_134103;NM_001159317
NTG	chr16	26498038	26498342	305	26498323	11	5.96414	4.05992	2.14251	Intergenic	Intergenic	Il1rap;Cldn16;Tmem207	NM_001101640;NM_053241;NM_008364;NM_001159318;NM_134103;NM_001159317
NTG	chr16	26498613	26498944	332	26498760	11	6.33668	4.28684	2.3116	Intergenic	Intergenic	Il1rap;Cldn16;Tmem207	NM_001101640;NM_053241;NM_008364;NM_001159318;NM_134103;NM_001159317
NTG	chr16	26499412	26499636	225	26499546	13	10.0816	6.21763	5.56484	Intergenic	Intergenic	Il1rap;Cldn16;Tmem207	NM_001101640;NM_053241;NM_008364;NM_001159318;NM_134103;NM_001159317
NTG	chr16	30829489	30829694	206	30829668	63	11.3919	2.61559	6.81873	Intergenic	Intergenic	Mir1195	NR_035427
NTG	chr16	39892467	39892666	200	39892497	7	7.37347	5.423	3.10364	Intergenic	L1Md_T|LINE|L1
NTG	chr16	41057984	41058183	200	41058119	9	9.76158	6.66372	5.26755	Intergenic	L1Md_T|LINE|L1
NTG	chr16	46758573	46758935	363	46758764	8	6.82411	5.04969	2.71632	Intergenic	L1Md_T|LINE|L1
NTG	chr16	47134554	47134753	200	47134583	7	6.09534	4.69467	2.14251	Intergenic	L1Md_T|LINE|L1
NTG	chr16	47752201	47752430	230	47752339	8	8.65321	6.10087	4.23101	Intergenic	L1Md_T|LINE|L1
NTG	chr16	48085589	48085889	301	48085745	8	6.82411	5.04969	2.71632	Intergenic	L1Md_F2|LINE|L1
NTG	chr16	49468081	49468280	200	49468209	11	5.96414	4.05992	2.14251	Intergenic	L1Md_T|LINE|L1
NTG	chr16	51253220	51253419	200	51253369	7	7.37347	5.423	3.10364	Intergenic	L1Md_A|LINE|L1
NTG	chr16	51322174	51322373	200	51322339	8	8.12707	5.81545	3.77667	Intergenic	L1Md_A|LINE|L1
NTG	chr16	53135569	53135855	287	53135680	8	8.12707	5.81545	3.77667	Intergenic	L1Md_F2|LINE|L1
NTG	chr16	56209266	56209467	202	56209375	8	8.12707	5.81545	3.77667	Intron	GA-rich|Low_complexity|Low_complexity	Impg2	NM_174876
NTG	chr16	58004120	58004347	228	58004201	5	4.62936	3.87697	1.36015	Intergenic	L1Md_Gf|LINE|L1
NTG	chr16	58251094	58251293	200	58251236	9	7.93401	5.61077	3.60345	Intergenic	L1Md_T|LINE|L1
NTG	chr16	58568171	58568390	220	58568250	9	7.93401	5.61077	3.60345	Intergenic	L1Md_A|LINE|L1	E330017A01Rik;Dcbld2;St3gal6;Gm813	NM_018784;NM_028523;NM_175011;NM_001033404
NTG	chr16	58906749	58906948	200	58906900	7	5.75922	4.48861	1.97086	Intergenic	L1Md_F2|LINE|L1	Olfr181;Olfr180;Olfr183;Olfr178;Olfr175-ps1;Olfr176;Olfr177	NM_146993;NM_146996;NM_146997;NM_146999;NM_001011662;NM_146485;NM_147002
NTG	chr16	60774594	60774984	391	60774679	8	6.82411	5.04969	2.71632	Intergenic	Intergenic
NTG	chr16	62201281	62201480	200	62201379	7	6.4746	4.92056	2.42617	Intergenic	L1Md_A|LINE|L1
NTG	chr16	62568803	62569002	200	62568987	7	6.4746	4.92056	2.42617	Intergenic	L1Md_T|LINE|L1
NTG	chr16	63312265	63312475	211	63312449	53	11.582	2.90299	7.00186	Intergenic	Lx2|LINE|L1
NTG	chr16	65060220	65060521	302	65060403	8	8.45908	5.99734	4.08316	Intron	L1Md_T|LINE|L1	Htr1f	NM_008310
NTG	chr16	71483550	71483749	200	71483699	9	7.55076	5.37485	3.27001	Intergenic	L1Md_A|LINE|L1
NTG	chr16	82089974	82090233	260	82090093	12	10.5289	6.70537	5.98968	Intergenic	L1Md_T|LINE|L1
NTG	chr16	83451906	83452129	224	83452060	10	6.08233	4.28921	2.14251	Intergenic	L1Md_A|LINE|L1
NTG	chr16	83890961	83891160	200	83891025	10	7.30242	5.06112	3.10364	Intergenic	Intergenic
NTG	chr16	85236107	85236311	205	85236247	10	9.08475	6.17184	4.62779	Intergenic	L1Md_Gf|LINE|L1	App	NM_001198823;NM_007471;NM_001198826;NM_001198825;NM_001198824
NTG	chr16	86727189	86727469	281	86727310	7	7.37347	5.423	3.10364	Intergenic	L1Md_T|LINE|L1
NTG	chr16	86976835	86977117	283	86976947	10	6.08233	4.28921	2.14251	Intergenic	L1Md_A|LINE|L1
NTG	chr16	87194916	87195351	436	87195021	9	8.36088	5.86834	3.98927	Intergenic	L1Md_T|LINE|L1
NTG	chr16	93789306	93789675	370	93789481	102	15.6835	2.47127	11.0012	Intron	(CCCTAA)n|Simple_repeat|Simple_repeat	Dopey2	NM_027293
NTG	chr16	94555593	94555830	238	94555683	8	8.12707	5.81545	3.77667	Intron	(TTGTG)n|Simple_repeat|Simple_repeat	Ripply3	NM_133229
NTG	chr16	95309144	95309346	203	95309207	7	5.75922	4.48861	1.97086	Intergenic	L1Md_T|LINE|L1	Kcnj6	NM_010606;NM_001025584;NM_001025585
NTG	chr17	4347242	4347510	269	4347418	9	9.97828	6.77875	5.4652	Intergenic	L1Md_A|LINE|L1
NTG	chr17	8907994	8908228	235	8908047	8	8.12707	5.81545	3.77667	Intron	L1Md_T|LINE|L1	Pde10a	NM_001290707
NTG	chr17	13498759	13499144	386	13498953	85	7.77093	1.90269	3.46906	Intergenic	(CTGTG)n|Simple_repeat|Simple_repeat	Smok2b;Gm10512;Smok2a;Tcp10c	NM_001167913;NR_033458;NM_001167578;NM_013741
NTG	chr17	13743616	13744479	864	13743969	100	17.0486	2.61999	12.34	Intron	(CTGTG)n|Simple_repeat|Simple_repeat	2700054A10Rik	NR_045436;NR_045437
NTG	chr17	13744749	13745270	522	13745087	81	11.3764	2.31503	6.80383	Intron	(CTGTG)n|Simple_repeat|Simple_repeat	2700054A10Rik	NR_045436;NR_045437
NTG	chr17	13745330	13746042	713	13745775	127	16.6065	2.29555	11.9053	Intron	(CTGTG)n|Simple_repeat|Simple_repeat	2700054A10Rik	NR_045436;NR_045437
NTG	chr17	14899250	14899449	200	14899347	7	5.75922	4.48861	1.97086	Intergenic	L1Md_T|LINE|L1	Wdr27;Thbs2	NM_011581;NM_175173
NTG	chr17	17353367	17353586	220	17353403	10	6.08233	4.28921	2.14251	Intergenic	L1Md_A|LINE|L1	Zfp97	NM_011765
NTG	chr17	20801883	20802082	200	20801947	8	7.63555	5.53563	3.33946	Intergenic	(GGAA)n|Simple_repeat|Simple_repeat	Vmn1r226;Vmn2r110;Fpr-rs3;Vmn1r227	NM_134191;NM_134195;NM_001104572;NM_008040
NTG	chr17	21949698	21950007	310	21949824	6	6.14427	4.74512	2.14251	Intergenic	L1Md_T|LINE|L1	Zfp820;2210404O09Rik;Zfp229;Zfp760	NM_029281;NM_001164676;NM_001256493;NM_001008501
NTG	chr17	22462118	22462317	200	22462185	6	6.14427	4.74512	2.14251	Intergenic	L1_Mus1|LINE|L1	Gm4944;Zfp946;Zfp758;Zfp944	NM_001205095;NM_145484;NM_176962;NM_198003
NTG	chr17	22842425	22842626	202	22842468	9	8.84168	6.1507	4.40595	Intergenic	L1Md_A|LINE|L1	Vmn2r112;Gm16386	NM_001104575;NR_030709
NTG	chr17	30219938	30220302	365	30220134	14	8.54012	5.07491	4.1607	Intron	intron (NM_148926, intron 2 of 4)	Zfand3	NM_148926
NTG	chr17	36846436	36846637	202	36846514	11	9.80735	6.44982	5.31044	Intergenic	L1Md_T|LINE|L1	H2-M9;H2-M1;H2-M10.5	NM_177637;NM_177636;NM_008205
NTG	chr17	41104451	41104650	200	41104559	8	7.63555	5.53563	3.33946	Intergenic	L1Md_T|LINE|L1	Glyatl3;9130008F23Rik;Cenpq;Mut	NM_027834;NM_008650;NM_001145060;NM_031863
NTG	chr17	41828530	41828854	325	41828678	6	6.14427	4.74512	2.14251	Intergenic	L1Md_T|LINE|L1
NTG	chr17	42351236	42351435	200	42351383	7	6.4746	4.92056	2.42617	Intergenic	L1_Mus2|LINE|L1
NTG	chr17	42908405	42908648	244	42908563	8	7.20556	5.28151	3.03975	Intergenic	L1Md_F3|LINE|L1	Gpr115;Gpr111;Cd2ap	NM_030067;NM_001033493;NM_001289501;NM_001289500;NM_001289499;NM_009847
NTG	chr17	51464100	51464303	204	51464131	13	10.4424	6.44142	5.90689	Intergenic	Intergenic
NTG	chr17	53324091	53324444	354	53324407	7	7.37347	5.423	3.10364	Intergenic	L1Md_T|LINE|L1
NTG	chr17	54260841	54261061	221	54260952	8	8.12707	5.81545	3.77667	Intergenic	L1Md_A|LINE|L1
NTG	chr17	54398857	54399197	341	54399007	7	7.37347	5.423	3.10364	Intergenic	L1Md_A|LINE|L1	1700025K24Rik;Slc5a7	NM_022025;NR_045825
NTG	chr17	55091612	55091811	200	55091717	7	6.90854	5.16929	2.77038	Intergenic	L1Md_A|LINE|L1
NTG	chr17	55734457	55734656	200	55734586	7	5.75922	4.48861	1.97086	Intron	L1Md_F2|LINE|L1	Vmn2r118	NM_001104582
NTG	chr17	57573098	57573298	201	57573128	8	7.20556	5.28151	3.03975	Intron	L1Md_A|LINE|L1	Emr1	NM_010130
NTG	chr17	58869670	58869869	200	58869730	6	6.14427	4.74512	2.14251	Intergenic	L1Md_A|LINE|L1
NTG	chr17	60616468	60616683	216	60616567	11	10.7907	7.04201	6.24196	Intergenic	L1_Mm|LINE|L1
NTG	chr17	62789617	62789816	200	62789704	6	5.74046	4.52313	1.97086	Intergenic	Intergenic
NTG	chr17	68090576	68090920	345	68090740	77	13.1376	2.57122	8.51278	Intron	(CCCTAA)n|Simple_repeat|Simple_repeat	Lama1	NM_008480
NTG	chr17	69872885	69873084	200	69872950	9	7.93401	5.61077	3.60345	Intergenic	L1Md_A|LINE|L1	A330050F15Rik	NM_001145192
NTG	chr17	75409297	75409506	210	75409408	9	8.84168	6.1507	4.40595	Intron	intron (NM_019919, intron 2 of 33)	Ltbp1	NM_019919
NTG	chr17	75825365	75825739	375	75825471	8	8.40152	5.96624	4.02804	Intergenic	L1Md_T|LINE|L1	Rasgrp3;Ltbp1	NM_001166493;NM_206958;NM_207246;NM_019919
NTG	chr17	82117347	82117589	243	82117404	7	6.09534	4.69467	2.14251	Intron	L1Md_T|LINE|L1	Slc8a1	NM_011406;NR_104580;NM_001286684;NM_001112798
NTG	chr17	89841589	89841847	259	89841669	9	7.55076	5.37485	3.27001	Intergenic	L1Md_T|LINE|L1	Gm4719	NR_045952
NTG	chr17	93896086	93896464	379	93896337	11	6.97193	4.67914	2.82963	Intergenic	L1Md_T|LINE|L1
NTG	chr17	94423631	94423840	210	94423777	8	7.63555	5.53563	3.33946	Intergenic	L1Md_F2|LINE|L1
NTG	chr17	95010567	95010874	308	95010707	9	8.84168	6.1507	4.40595	Intergenic	L1Md_T|LINE|L1
NTG	chr18	3706693	3706899	207	3706851	7	5.75922	4.48861	1.97086	Intergenic	L1Md_T|LINE|L1
NTG	chr18	4471202	4471401	200	4471327	7	7.37347	5.423	3.10364	Intergenic	L1Md_F3|LINE|L1	Mtpap	NM_026157
NTG	chr18	7241721	7241999	279	7241854	9	9.97828	6.77875	5.4652	Intron	L1Md_F2|LINE|L1	Armc4	NM_001081393
NTG	chr18	8212987	8213186	200	8213093	7	6.90854	5.16929	2.77038	Intergenic	L1Md_T|LINE|L1
NTG	chr18	10265393	10265592	200	10265486	8	8.65321	6.10087	4.23101	Intergenic	(GAAA)n|Simple_repeat|Simple_repeat	Rock1;Greb1l	NM_009071;NM_001083628
NTG	chr18	16141906	16142145	240	16141991	9	9.97828	6.77875	5.4652	Intergenic	L1Md_T|LINE|L1
NTG	chr18	16497740	16497972	233	16497911	8	6.82411	5.04969	2.71632	Intergenic	L1Md_A|LINE|L1
NTG	chr18	17152318	17152517	200	17152340	9	8.84168	6.1507	4.40595	Intergenic	L1Md_T|LINE|L1
NTG	chr18	19512110	19512319	210	19512238	7	6.90854	5.16929	2.77038	Intergenic	L1Md_A|LINE|L1
NTG	chr18	28511027	28511240	214	28511177	10	10.6957	7.10777	6.14976	Intergenic	L1Md_A|LINE|L1
NTG	chr18	28691035	28691234	200	28691091	8	6.17212	4.64218	2.16517	Intergenic	L1Md_F2|LINE|L1	4930474G06Rik	NR_045398
NTG	chr18	29714570	29714817	248	29714759	8	6.48191	4.83737	2.42644	Intergenic	L1Md_F|LINE|L1	4930527G23Rik;4930578E11Rik	NR_045395;NR_045391
NTG	chr18	31519631	31519830	200	31519763	7	7.37347	5.423	3.10364	Intergenic	L1Md_T|LINE|L1	Syt4;Rit2	NM_009308;NM_009065
NTG	chr18	37780254	37780453	200	37780311	6	5.74046	4.52313	1.97086	Intron	(GAA)n|Simple_repeat|Simple_repeat	Pcdha4-g;Pcdha7-g;Pcdha6-g	NM_001301256;NM_001174154;NM_001301259
NTG	chr18	41984179	41984406	228	41984246	7	7.37347	5.423	3.10364	Intergenic	L1Md_T|LINE|L1	Prelid2	NM_029942
NTG	chr18	43073447	43073801	355	43073625	68	12.417	2.65046	7.81201	Intron	(TTAGGG)n|Simple_repeat|Simple_repeat	Ppp2r2b	NM_028392
NTG	chr18	47547694	47547946	253	47547753	8	8.65321	6.10087	4.23101	Intergenic	L1Md_F2|LINE|L1	9130209A04Rik;Sema6a	NR_033453;NM_018744
NTG	chr18	48169933	48170293	361	48170114	90	12.9237	2.36058	8.30342	Intron	(CCCTAA)n|Simple_repeat|Simple_repeat	G630055G22Rik	NR_045404
NTG	chr18	50486564	50486788	225	50486629	10	10.6957	7.10777	6.14976	Intergenic	L1Md_A|LINE|L1	Fam170a	NM_001004061
NTG	chr18	51486721	51486923	203	51486862	9	8.84168	6.1507	4.40595	Intergenic	(GA)n|Simple_repeat|Simple_repeat	Prr16	NM_001081224
NTG	chr18	52417346	52417545	200	52417376	9	6.3263	4.60102	2.3016	Intergenic	L1Md_T|LINE|L1	Ftmt	NM_026286
NTG	chr18	59656422	59656621	200	59656497	6	6.14427	4.74512	2.14251	Intergenic	L1Md_F2|LINE|L1	Mir6355;Chsy3	NM_001081328;NR_105773
NTG	chr18	60495154	60495353	200	60495212	6	5.03536	4.10784	1.41082	Intergenic	L1Md_F2|LINE|L1	Iigp1;Gm4951;F830016B08Rik;Gm4841	NM_001146275;NM_001034859;NM_001033767;NM_001101475;NM_021792
NTG	chr18	62450524	62450822	299	62450588	7	7.37347	5.423	3.10364	Intergenic	L1Md_T|LINE|L1	Htr4	NM_008313
NTG	chr18	63635388	63635644	257	63635502	9	7.93401	5.61077	3.60345	Intergenic	L1Md_A|LINE|L1	Piezo2	NM_001039485
NTG	chr18	70953313	70953670	358	70953483	7	7.37347	5.423	3.10364	Intergenic	L1Md_A|LINE|L1
NTG	chr18	71793334	71793591	258	71793474	9	9.97828	6.77875	5.4652	Intron	L1Md_T|LINE|L1	Dcc	NM_007831
NTG	chr18	72651550	72651767	218	72651583	9	5.2296	3.89928	1.58893	Intergenic	L1Md_A|LINE|L1
NTG	chr18	79897528	79897784	257	79897564	8	6.82411	5.04969	2.71632	Intergenic	(TTC)n|Simple_repeat|Simple_repeat
NTG	chr18	87442477	87442726	250	87442528	7	5.75922	4.48861	1.97086	Intergenic	L1Md_T|LINE|L1
NTG	chr18	88053230	88053429	200	88053292	9	6.3263	4.60102	2.3016	Intergenic	L1Md_T|LINE|L1
NTG	chr18	88319202	88319401	200	88319297	7	7.37347	5.423	3.10364	Intergenic	L1Md_A|LINE|L1
NTG	chr18	89105002	89105201	200	89105043	9	7.93401	5.61077	3.60345	Intergenic	Lx3_Mus|LINE|L1	Mir6359;Socs6;Rttn	NM_018821;NM_175542;NR_105777
NTG	chr18	89113804	89114012	209	89113942	10	9.08475	6.17184	4.62779	Intergenic	L1Md_A|LINE|L1	Mir6359;Socs6;Rttn	NM_018821;NM_175542;NR_105777
NTG	chr18	90545414	90545624	211	90545495	9	7.93401	5.61077	3.60345	Intergenic	L1Md_T|LINE|L1
NTG	chr18	90771507	90772031	525	90771774	397	64.8921	2.69503	58.477	Intergenic	(TTAGGG)n|Simple_repeat|Simple_repeat	Tmx3	NM_198295
NTG	chr19	3174475	3174691	217	3174560	7	6.90854	5.16929	2.77038	Intron	L1_Mm|LINE|L1	1700030N03Rik	NR_045304
NTG	chr19	3661075	3661302	228	3661113	11	6.97193	4.67914	2.82963	Intron	GA-rich|Low_complexity|Low_complexity	Lrp5	NM_008513
NTG	chr19	8604524	8604748	225	8604635	9	7.93401	5.61077	3.60345	Intergenic	L1Md_T|LINE|L1	Slc22a6;Slc22a8	NM_001164635;NM_031194;NM_008766;NM_001164634
NTG	chr19	12279520	12279781	262	12279696	7	7.37347	5.423	3.10364	Promoter	(TTTC)n|Simple_repeat|Simple_repeat	Olfr1431	NM_146414
NTG	chr19	14186661	14186971	311	14186780	11	8.31567	5.52122	3.95108	Intergenic	L1Md_F|LINE|L1
NTG	chr19	15383566	15383857	292	15383708	8	8.65321	6.10087	4.23101	Intergenic	L1Md_A|LINE|L1
NTG	chr19	19314458	19314669	212	19314511	7	6.90854	5.16929	2.77038	Intergenic	L1Md_T|LINE|L1
NTG	chr19	20646389	20646591	203	20646459	10	8.27568	5.67377	3.91576	Intergenic	L1Md_T|LINE|L1	C730002L08Rik;E030003E18Rik;Aldh1a1	NR_045778;NR_015502;NM_013467
NTG	chr19	20812325	20812543	219	20812486	10	8.27568	5.67377	3.91576	Intergenic	L1_Mus1|LINE|L1	Aldh1a7;Aldh1a1;Tmc1	NM_028953;NM_011921;NM_013467
NTG	chr19	24699589	24699802	214	24699640	8	6.82411	5.04969	2.71632	Intergenic	Intergenic	Pip5k1b;Tmem252;Pgm5	NM_008846;NM_183160;NM_175013
NTG	chr19	25834157	25834356	200	25834219	10	9.08475	6.17184	4.62779	Intergenic	L1Md_A|LINE|L1	2610016A17Rik;Dmrt2	NR_045347;NM_145831
NTG	chr19	26314150	26314367	218	26314296	6	5.74046	4.52313	1.97086	Intergenic	L1Md_T|LINE|L1
NTG	chr19	35310569	35310856	288	35310846	7	7.37347	5.423	3.10364	Intergenic	L1Md_T|LINE|L1
NTG	chr19	37189445	37189660	216	37189573	10	9.55709	6.45517	5.07275	Intron	(GAAA)n|Simple_repeat|Simple_repeat	Cpeb3	NM_001290826;NM_001290827;NM_198300;NM_001290828;NM_001290829
NTG	chr19	46225825	46226024	200	46225973	8	8.65321	6.10087	4.23101	Promoter	(TTC)n|Simple_repeat|Simple_repeat	Pitx3;Gbf1	NM_008852;NM_178930
NTG	chr19	49145261	49145588	328	49145557	6	6.14427	4.74512	2.14251	Intergenic	L1Md_T|LINE|L1
NTG	chr19	50022495	50022700	206	50022674	8	8.65321	6.10087	4.23101	Intergenic	L1Md_F3|LINE|L1
NTG	chr19	50384970	50385173	204	50385147	53	10.2463	2.67777	5.72234	Intron	ID_B1|SINE|B4	Sorcs1	NM_001290356;NM_021377;NM_001252501
NTG	chr19	51164842	51165098	257	51164940	8	6.48191	4.83737	2.42644	Intergenic	L1Md_T|LINE|L1
NTG	chr19	51537731	51538042	312	51537853	8	8.18027	5.845	3.82675	Intergenic	L1Md_T|LINE|L1
NTG	chr19	56486366	56486643	278	56486519	10	10.6957	7.10777	6.14976	Intron	L1Md_T|LINE|L1	Casp7	NM_007611
NTG	chr19	60427850	60428117	268	60427919	7	7.37347	5.423	3.10364	Intergenic	L1Md_A|LINE|L1
NTG	chr2	4119721	4119960	240	4119846	9	8.36088	5.86834	3.98927	Intron	L1Md_A|LINE|L1	Frmd4a	NM_172475
NTG	chr2	6057406	6057645	240	6057526	16	14.8433	8.42847	10.1784	Intron	(GAAA)n|Simple_repeat|Simple_repeat	Gm10857	NR_033471;NR_033470
NTG	chr2	7338462	7338661	200	7338553	10	8.27568	5.67377	3.91576	Intergenic	L1Md_T|LINE|L1	Celf2	NM_001110232;NM_001110231
NTG	chr2	7962088	7962315	228	7962227	7	5.75922	4.48861	1.97086	Intergenic	L1Md_T|LINE|L1
NTG	chr2	8109455	8109684	230	8109547	6	4.74446	3.92754	1.36794	Intergenic	L1Md_T|LINE|L1
NTG	chr2	9117921	9118154	234	9117987	7	7.37347	5.423	3.10364	Intron	(GAAA)n|Simple_repeat|Simple_repeat	1700061F12Rik	NR_038180
NTG	chr2	11044619	11044869	251	11044711	7	5.75922	4.48861	1.97086	Intergenic	L1Md_T|LINE|L1	Prkcq	NM_008859
NTG	chr2	14942842	14943167	326	14943012	6	6.14427	4.74512	2.14251	Intron	L1Md_T|LINE|L1	Nsun6	NM_001165941;NM_028950;NM_001165943
NTG	chr2	15299802	15300126	325	15300051	7	5.75922	4.48861	1.97086	Intergenic	L1Md_A|LINE|L1
NTG	chr2	19430807	19431014	208	19430979	63	11.0984	2.57444	6.53815	Intron	intron (NM_027600, intron 8 of 16)	4921504E06Rik	NM_027600
NTG	chr2	21223512	21223711	200	21223677	9	7.93401	5.61077	3.60345	Intergenic	L1Md_A|LINE|L1	Enkur;Gpr158;Thnsl1	NM_001001297;NM_001004761;NM_027728;NM_177588
NTG	chr2	22443125	22443530	406	22443313	122	13.1553	2.08866	8.53009	Intron	intron (NM_148413, intron 30 of 33)	Myo3a	NM_148413
NTG	chr2	22445468	22445691	224	22445521	120	30.9872	3.52508	26.1324	Intron	intron (NM_148413, intron 30 of 33)	Myo3a	NM_148413
NTG	chr2	23808276	23808475	200	23808327	12	7.89559	5.06906	3.58616	Intergenic	L1Md_T|LINE|L1	Hnmt	NM_080462
NTG	chr2	36694844	36695142	299	36694994	8	8.12707	5.81545	3.77667	Intergenic	L1Md_F2|LINE|L1	Olfr3;Olfr50;Olfr348;Olfr354;Olfr355;Olfr356;Olfr350;Olfr351;Olfr352;Olfr353	NM_146942;NM_146941;NM_146940;NM_146946;NM_146944;NM_146627;NM_146624;NM_146625;NM_206903;NM_146939
NTG	chr2	39373841	39374110	270	39373936	7	7.35966	5.41567	3.10364	Intergenic	L1Md_F2|LINE|L1
NTG	chr2	40216772	40216984	213	40216787	9	5.2296	3.89928	1.58893	Intergenic	L1Md_T|LINE|L1
NTG	chr2	40229052	40229251	200	40229158	6	6.14427	4.74512	2.14251	Intergenic	L1Md_A|LINE|L1
NTG	chr2	40789990	40790213	224	40790041	8	6.82411	5.04969	2.71632	Intron	L1Md_T|LINE|L1	Lrp1b	NM_053011
NTG	chr2	41216524	41216791	268	41216696	7	4.49972	3.68081	1.26959	Intron	L1_Mm|LINE|L1	Lrp1b	NM_053011
NTG	chr2	41751730	41751936	207	41751770	63	11.6932	2.65808	7.10999	Intron	intron (NM_053011, intron 3 of 90)	Lrp1b	NM_053011
NTG	chr2	41931206	41931405	200	41931317	6	6.14427	4.74512	2.14251	Intron	L1Md_T|LINE|L1	Lrp1b	NM_053011
NTG	chr2	42426003	42426202	200	42426058	9	9.97828	6.77875	5.4652	Intron	L1Md_T|LINE|L1	Lrp1b	NM_053011
NTG	chr2	42881769	42881982	214	42881819	11	10.2729	6.73292	5.74425	Intergenic	Intergenic
NTG	chr2	43740512	43740711	200	43740670	10	7.30242	5.06112	3.10364	Intron	L1Md_A|LINE|L1	Arhgap15	NM_153820;NM_001025377
NTG	chr2	44136217	44136504	288	44136286	8	7.63555	5.53563	3.33946	Intron	L1Md_T|LINE|L1	Arhgap15	NM_153820
NTG	chr2	50094941	50095173	233	50095072	6	6.14427	4.74512	2.14251	Intergenic	L1_Mus2|LINE|L1	Lypd6;Gm13483;Mmadhc	NR_040362;NR_040361;NR_033304;NM_133839;NM_177139
NTG	chr2	50624092	50624342	251	50624178	8	6.82411	5.04969	2.71632	Intergenic	L1Md_T|LINE|L1
NTG	chr2	55052965	55053164	200	55053083	8	8.12707	5.81545	3.77667	Intergenic	L1Md_A|LINE|L1	Galnt13	NM_173030
NTG	chr2	55617277	55617476	200	55617423	8	7.63555	5.53563	3.33946	Intergenic	L1Md_F|LINE|L1
NTG	chr2	57481793	57482205	413	57481949	167	22.5864	2.3657	17.8145	Intergenic	(TTAGGG)n|Simple_repeat|Simple_repeat
NTG	chr2	61687159	61687452	294	61687294	11	11.3733	7.38084	6.80084	Intergenic	L1Md_T|LINE|L1	Psmd14;Tbr1	NM_009322;NM_021526
NTG	chr2	62011650	62011862	213	62011838	6	5.74046	4.52313	1.97086	Intron	L1Md_T|LINE|L1	Slc4a10	NM_001242379;NM_001242378;NM_001242380;NM_001242381;NM_001242382;NM_001242383;NM_033552
NTG	chr2	62700680	62700886	207	62700804	8	8.65321	6.10087	4.23101	Intron	L1Md_T|LINE|L1	Kcnh7	NM_133207
NTG	chr2	63211467	63211742	276	63211592	11	10.7907	7.04201	6.24196	Intergenic	L1Md_T|LINE|L1
NTG	chr2	64722549	64722748	200	64722615	7	6.90854	5.16929	2.77038	Intergenic	(GA)n|Simple_repeat|Simple_repeat	Grb14	NM_016719
NTG	chr2	66583470	66583670	201	66583583	8	7.63555	5.53563	3.33946	Intron	L1Md_T|LINE|L1	Scn7a	NM_009135
NTG	chr2	66583735	66583934	200	66583791	8	7.63555	5.53563	3.33946	Intron	L1Md_T|LINE|L1	Scn7a	NM_009135
NTG	chr2	75630228	75630427	200	75630390	9	7.93401	5.61077	3.60345	Intergenic	Intergenic	Nfe2l2;Agps	NM_010902;NM_172666
NTG	chr2	80094619	80094818	200	80094720	8	8.65321	6.10087	4.23101	Intergenic	L1Md_T|LINE|L1	Prdx6b;Dnajc10	NM_177256;NM_024181
NTG	chr2	80995764	80995963	200	80995907	9	6.3263	4.60102	2.3016	Intergenic	L1Md_A|LINE|L1
NTG	chr2	82171568	82171839	272	82171649	7	4.49972	3.68081	1.26959	Intergenic	L1Md_A|LINE|L1	Zfp804a	NM_175513
NTG	chr2	82269396	82269699	304	82269567	8	8.12707	5.81545	3.77667	Intergenic	L1Md_A|LINE|L1
NTG	chr2	83215330	83215529	200	83215474	8	8.65321	6.10087	4.23101	Intergenic	L1Md_A|LINE|L1
NTG	chr2	83215629	83215828	200	83215789	6	5.74046	4.52313	1.97086	Intergenic	L1Md_A|LINE|L1
NTG	chr2	83272072	83272309	238	83272125	10	7.92423	5.45371	3.60345	Intergenic	L1Md_T|LINE|L1
NTG	chr2	83316029	83316228	200	83316067	8	7.20556	5.28151	3.03975	Intergenic	L1Md_T|LINE|L1
NTG	chr2	83773547	83773746	200	83773663	9	9.97828	6.77875	5.4652	Intron	L1Md_T|LINE|L1	Zswim2	NM_027964
NTG	chr2	84957868	84958067	200	84957941	5	4.9722	4.06725	1.36794	Intergenic	L1Md_F2|LINE|L1	Aplnr;Ssrp1;Tnks1bp1;Lrrc55;P2rx3;4930443O20Rik	NM_001081260;NM_001033346;NM_145526;NM_011784;NM_182990;NM_001136081;NR_040504
NTG	chr2	87519777	87519976	200	87519839	7	7.25359	5.35891	3.08456	Intergenic	L1Md_A|LINE|L1	Olfr1141;Olfr1140;Olfr1136;Olfr1137;Olfr1134;Olfr1135;Olfr1132;Olfr1133;Olfr1130;Olfr1131;Olfr1138	NM_146639;NM_147030;NM_146836;NM_146660;NM_146838;NM_146637;NM_001011833;NM_146659;NM_146351;NM_146658;NM_146642
NTG	chr2	88618897	88619096	200	88619080	7	6.4746	4.92056	2.42617	Intergenic	L1Md_T|LINE|L1	Olfr1198;Olfr1199;Olfr1200;Olfr1201;Olfr1202;Olfr1193;Olfr1204;Olfr1195;Olfr1196;Olfr1197;Olfr1205;Olfr1206	NM_146464;NM_207567;NM_146896;NM_001011517;NM_146753;NM_146462;NM_001005227;NM_001005225;NM_146463;NM_146895;NM_001001810;NM_146458
NTG	chr2	88908904	88909103	200	88909044	7	5.75922	4.48861	1.97086	Intergenic	L1Md_F2|LINE|L1	Olfr1219;Olfr1218;Olfr1223;Olfr1213;Olfr1222;Olfr1217;Olfr1216;Olfr1215;Olfr1214;Olfr1220;Olfr1221	NM_146897;NM_001011860;NM_146459;NM_146818;NM_146893;NM_146892;NM_146899;NM_146898;NM_146902;NM_146901;NM_146900
NTG	chr2	89358649	89358848	200	89358746	9	9.97828	6.77875	5.4652	Intergenic	L1Md_T|LINE|L1	Olfr1245;Olfr1246;Olfr1247;Olfr1240;Olfr1241;Olfr1242;Olfr1243;Olfr1248	NM_146969;NM_146968;NM_146808;NM_146455;NM_146966;NM_146792;NM_146791;NM_146788
NTG	chr2	89737715	89737941	227	89737807	7	5.75922	4.48861	1.97086	Intergenic	L1Md_T|LINE|L1	Olfr1257;Olfr1256;Olfr1255;Olfr1259;Olfr1258;Olfr48;Olfr1260;Olfr1261	NM_146978;NM_146474;NM_146977;NM_146983;NM_146982;NM_146981;NM_146341;NM_010990
NTG	chr2	90087541	90087740	200	90087554	9	7.93401	5.61077	3.60345	Intergenic	L1Md_T|LINE|L1	Olfr142;Olfr1273-ps;Olfr1506;Olfr1272;Olfr1271;Olfr1270;Gm13769	NM_146265;NM_146975;NM_146985;NM_146984;NM_146980;NM_146793;NM_001270423
NTG	chr2	96799966	96800228	263	96800132	8	8.12707	5.81545	3.77667	Intron	L1Md_T|LINE|L1	Lrrc4c	NM_001289743;NM_001289742
NTG	chr2	98148628	98148827	200	98148736	6	6.14427	4.74512	2.14251	Intergenic	L1Md_T|LINE|L1
NTG	chr2	101409101	101409384	284	101409225	7	7.37347	5.423	3.10364	Intron	intron (NM_026592, intron 6 of 6)	B230118H07Rik	NM_026592
NTG	chr2	102708426	102708625	200	102708470	8	5.39072	4.14092	1.70816	Intron	(GAAA)n|Simple_repeat|Simple_repeat	Cd44	NM_001039151;NM_001039150;NM_001177785;NM_001177787;NM_001177786;NM_009851
NTG	chr2	102990929	102991128	200	102991061	8	8.65321	6.10087	4.23101	Intergenic	Intergenic	Pdhx;Apip	NM_175094;NM_019735
NTG	chr2	104026714	104026952	239	104026826	10	6.08233	4.28921	2.14251	Intron	intron (NM_001033347, intron 16 of 20)	D430041D05Rik	NM_001033347
NTG	chr2	107586868	107587132	265	107586939	8	5.39072	4.14092	1.70816	Intergenic	L1Md_A|LINE|L1
NTG	chr2	109965046	109965279	234	109965147	12	9.36316	5.98132	4.8935	Intergenic	L1Md_T|LINE|L1	Ccdc34;Ccdc34os	NM_026613;NR_040508
NTG	chr2	110133636	110133844	209	110133819	66	11.828	2.61289	7.24137	Intron	intron (NM_130452, intron 2 of 6)	Bbox1	NM_130452
NTG	chr2	110185572	110185819	248	110185658	11	6.97193	4.67914	2.82963	Intergenic	L1Md_A|LINE|L1	Fibin;Bbox1	NM_130452;NM_026271
NTG	chr2	111490844	111491140	297	111491014	9	7.93401	5.61077	3.60345	Promoter	L1Md_A|LINE|L1	Olfr1298	NM_146886
NTG	chr2	112973515	112973714	200	112973693	8	5.39072	4.14092	1.70816	Intergenic	L1Md_A|LINE|L1
NTG	chr2	116281678	116281877	200	116281798	9	6.3263	4.60102	2.3016	Intergenic	L1Md_T|LINE|L1
NTG	chr2	116416858	116417057	200	116416974	9	9.97828	6.77875	5.4652	Intergenic	L1Md_T|LINE|L1
NTG	chr2	123615139	123615445	307	123615175	6	5.36399	4.30549	1.69697	Intergenic	L1Md_T|LINE|L1
NTG	chr2	126066400	126066599	200	126066441	8	6.17212	4.64218	2.16517	Intergenic	L1Md_T|LINE|L1	Fam227b;Atp8b4;Dtwd1	NM_001080944;NM_026981;NM_029455
NTG	chr2	126088922	126089386	465	126089253	9	8.36088	5.86834	3.98927	Intergenic	L1Md_A|LINE|L1	Atp8b4;Dtwd1	NM_001080944;NM_026981
NTG	chr2	127621939	127622195	257	127622110	9	9.39086	6.46161	4.91452	Promoter	L1Md_T|LINE|L1	1500011K16Rik	NR_015476
NTG	chr2	132838589	132838985	397	132838667	7	6.90854	5.16929	2.77038	Intergenic	L1Md_F2|LINE|L1	Fermt1	NM_198029
NTG	chr2	134441220	134441419	200	134441303	6	6.14427	4.74512	2.14251	Intron	intron (NM_029148, intron 4 of 7)	Tmx4	NM_029148
NTG	chr2	136793148	136793347	200	136793273	8	8.65321	6.10087	4.23101	Intron	L1Md_A|LINE|L1	Slx4ip	NM_028201;NM_001038641;NM_028834
NTG	chr2	137175931	137176130	200	137176030	7	7.37347	5.423	3.10364	Intergenic	L1Md_A|LINE|L1
NTG	chr2	137999006	137999205	200	137999054	8	6.82411	5.04969	2.71632	Intergenic	L1Md_A|LINE|L1	Btbd3	NM_001025431
NTG	chr2	140563666	140563976	311	140563793	8	6.82411	5.04969	2.71632	Intron	L1Md_A|LINE|L1	Macrod2	NM_001013802
NTG	chr2	140579504	140579711	208	140579681	7	7.37347	5.423	3.10364	Intron	L1Md_A|LINE|L1	Macrod2	NM_001013802
NTG	chr2	147051347	147051624	278	147051435	6	5.74046	4.52313	1.97086	Intron	(TTTC)n|Simple_repeat|Simple_repeat	Nkx2-2os	NR_030769
NTG	chr2	151024892	151025091	200	151024899	6	5.36399	4.30549	1.69697	Intergenic	L1Md_T|LINE|L1
NTG	chr2	151110379	151110693	315	151110547	7	7.37347	5.423	3.10364	Intergenic	L1Md_A|LINE|L1	4930442J19Rik	NR_040747
NTG	chr2	159173561	159173955	395	159173773	10	9.08475	6.17184	4.62779	Intergenic	L1Md_T|LINE|L1
NTG	chr2	171403806	171404005	200	171403838	6	6.14427	4.74512	2.14251	Intergenic	L1Md_T|LINE|L1
NTG	chr2	175859050	175859249	200	175859125	8	8.65321	6.10087	4.23101	Intergenic	L1_Mus1|LINE|L1	Gm6710;Gm8898;Gm14431	NM_001177405;NM_001177406;NM_001164689;NM_001177404;NM_001177407
NTG	chr2	176152558	176152797	240	176152736	8	8.65321	6.10087	4.23101	Intergenic	L1VL1|LINE|L1	Gm14436	NM_001242943
NTG	chr2	181747430	181748008	579	181747761	324	46.9437	2.50605	41.7681	Intergenic	(TTAGGG)n|Simple_repeat|Simple_repeat	Gm14496	NM_001205282
NTG	chr3	3223389	3223617	229	3223533	8	8.12707	5.81545	3.77667	Intergenic	(GAAA)n|Simple_repeat|Simple_repeat
NTG	chr3	9966461	9966699	239	9966541	9	7.93401	5.61077	3.60345	Intergenic	L1Md_T|LINE|L1	Fabp5	NM_010634;NM_001272098;NM_001272097
NTG	chr3	15253534	15253822	289	15253664	8	6.82411	5.04969	2.71632	Intergenic	L1Md_A|LINE|L1	Gm9733	NM_001076679
NTG	chr3	15773808	15774007	200	15773931	7	6.09534	4.69467	2.14251	Intergenic	L1Md_T|LINE|L1	LOC100038947;Gm5150	NM_001081687;NM_001173459
NTG	chr3	16481760	16481959	200	16481884	7	7.37347	5.423	3.10364	Intergenic	L1Md_A|LINE|L1
NTG	chr3	18869367	18869566	200	18869540	6	6.14427	4.74512	2.14251	Intergenic	L1Md_T|LINE|L1
NTG	chr3	19257747	19257946	200	19257787	10	9.08475	6.17184	4.62779	Intergenic	L1Md_F|LINE|L1	Pde7a	NM_008802;NM_001122759
NTG	chr3	21597229	21597591	363	21597407	90	14.7476	2.54106	10.0852	Intergenic	(TTAGGG)n|Simple_repeat|Simple_repeat
NTG	chr3	22142820	22143045	226	22142902	7	6.09534	4.69467	2.14251	Intergenic	L1Md_A|LINE|L1	Rprl2;Tbl1xr1	NM_030732;NR_004439
NTG	chr3	22357640	22357839	200	22357752	6	4.74446	3.92754	1.36794	Intergenic	L1Md_T|LINE|L1
NTG	chr3	22980514	22980721	208	22980659	8	6.82411	5.04969	2.71632	Intergenic	L1Md_T|LINE|L1
NTG	chr3	25151889	25152088	200	25151996	7	6.4746	4.92056	2.42617	Intergenic	L1Md_T|LINE|L1
NTG	chr3	26011127	26011339	213	26011306	6	6.14427	4.74512	2.14251	Intron	L1Md_T|LINE|L1	Nlgn1	NM_138666;NM_001163387
NTG	chr3	26803592	26803896	305	26803845	9	6.3263	4.60102	2.3016	Intron	L1Md_A|LINE|L1	Spata16	NM_029150;NM_027583
NTG	chr3	28807743	28807942	200	28807800	7	7.37347	5.423	3.10364	Intron	(TTTC)n|Simple_repeat|Simple_repeat	Gm1527	NM_001033479
NTG	chr3	29619681	29619880	200	29619793	6	6.14427	4.74512	2.14251	Intergenic	L1Md_A|LINE|L1	Mir21b;Egfem1	NR_105796;NM_001167748;NM_029412
NTG	chr3	33519426	33519656	231	33519577	9	9.97828	6.77875	5.4652	Intergenic	L1Md_A|LINE|L1
NTG	chr3	35088725	35088951	227	35088819	8	8.65321	6.10087	4.23101	Intergenic	L1Md_F2|LINE|L1
NTG	chr3	46003790	46004010	221	46003832	8	6.82411	5.04969	2.71632	Intergenic	L1Md_T|LINE|L1
NTG	chr3	46004401	46004667	267	46004503	8	8.65321	6.10087	4.23101	Intergenic	L1Md_T|LINE|L1
NTG	chr3	46726472	46726752	281	46726611	11	10.2729	6.73292	5.74425	Intergenic	L1Md_T|LINE|L1
NTG	chr3	46739088	46739436	349	46739200	11	5.96414	4.05992	2.14251	Intergenic	L1Md_A|LINE|L1
NTG	chr3	47180435	47180634	200	47180518	6	5.99518	4.6646	2.14251	Intergenic	L1Md_A|LINE|L1
NTG	chr3	49250849	49251171	323	49250978	7	5.75922	4.48861	1.97086	Intergenic	L1Md_T|LINE|L1
NTG	chr3	57504726	57504987	262	57504901	7	7.37347	5.423	3.10364	Intergenic	L1Md_F2|LINE|L1	Commd2;Ankub1;Rnf13	NM_175095;NM_001113413;NM_011883;NM_001033349
NTG	chr3	60977004	60977439	436	60977266	9	7.93401	5.61077	3.60345	Intergenic	L1Md_T|LINE|L1
NTG	chr3	61013551	61013771	221	61013600	7	7.37347	5.423	3.10364	Intergenic	L1Md_F2|LINE|L1
NTG	chr3	62559900	62560121	222	62560011	10	10.0888	6.76577	5.56994	Intergenic	L1Md_F2|LINE|L1
NTG	chr3	66034706	66034962	257	66034850	7	5.75922	4.48861	1.97086	Intron	L1Md_T|LINE|L1	Veph1	NM_145820
NTG	chr3	66962496	66962695	200	66962586	10	7.30242	5.06112	3.10364	Intron	L1Md_A|LINE|L1	Rsrc1	NM_025822
NTG	chr3	71242066	71242265	200	71242135	7	4.49972	3.68081	1.26959	Intergenic	L1Md_A|LINE|L1
NTG	chr3	74669868	74670115	248	74669928	6	5.82268	4.56932	2.03076	Intergenic	L1Md_A|LINE|L1
NTG	chr3	75584909	75585132	224	75584977	8	8.12707	5.81545	3.77667	Intergenic	L1Md_A|LINE|L1	Golim4	NM_175193;NM_001291069
NTG	chr3	75895269	75895468	200	75895339	9	6.3263	4.60102	2.3016	Intron	L1Md_A|LINE|L1	Fstl5	NM_178673;NM_001253719
NTG	chr3	78624552	78624841	290	78624742	8	8.65321	6.10087	4.23101	Intergenic	L1Md_T|LINE|L1
NTG	chr3	80158536	80158745	210	80158612	8	6.82411	5.04969	2.71632	Intergenic	L1Md_T|LINE|L1
NTG	chr3	83185320	83185524	205	83185348	7	7.37347	5.423	3.10364	Intergenic	L1Md_T|LINE|L1
NTG	chr3	90741031	90741232	202	90741093	8	8.34489	5.93546	3.97811	Intergenic	L1Md_F3|LINE|L1
NTG	chr3	90905353	90905644	292	90905471	9	6.3263	4.60102	2.3016	Intergenic	L1Md_A|LINE|L1	4930529C04Rik;9130204L05Rik	NM_001101461;NR_033593
NTG	chr3	90933340	90933547	208	90933412	12	9.36316	5.98132	4.8935	Intergenic	L1Md_T|LINE|L1	4930529C04Rik;9130204L05Rik	NM_001101461;NR_033593
NTG	chr3	92355965	92356164	200	92356102	6	5.78125	4.54611	1.99177	Intergenic	L1Md_A|LINE|L1	Ivl;Smcp;Sprr4;Sprr3;Lce1a1;Lce6a;Sprr1a	NM_008412;NM_025984;NM_009264;NM_008574;NM_011478;NM_001166172;NM_001204427;NM_173070
NTG	chr3	93030487	93030686	200	93030529	9	7.93401	5.61077	3.60345	Intergenic	L1Md_F|LINE|L1	Flg2;Hrnr;Crnn	NM_001081200;NM_001013804;NM_133698
NTG	chr3	93532438	93532637	200	93532489	8	6.48191	4.83737	2.42644	Intergenic	L1_Mur2|LINE|L1	Tdpoz3;Tdpoz2;Tdpoz1;Tdpoz4	NM_148949;NM_207271;NM_001007222;NM_207272
NTG	chr3	94091789	94092050	262	94091878	8	8.12707	5.81545	3.77667	Intergenic	L1Md_T|LINE|L1	Rorc;Them5;Them4;C2cd4d	NM_001136117;NM_029431;NM_001293734;NM_011281;NM_025416;NR_121656
NTG	chr3	94355603	94355826	224	94355770	8	7.63555	5.53563	3.33946	Intron	L1Md_Gf|LINE|L1	Snx27	NM_001082484;NM_029721
NTG	chr3	96647894	96648136	243	96647954	14	6.66361	4.01283	2.60081	Intron	(TG)n|Simple_repeat|Simple_repeat	Pdzk1	NM_001146001;NM_021517
NTG	chr3	98445212	98445411	200	98445309	8	5.39072	4.14092	1.70816	Intron	L1Md_A|LINE|L1	Hsd3b5	NM_008295
NTG	chr3	98603171	98603403	233	98603288	7	5.75922	4.48861	1.97086	Intergenic	L1Md_F|LINE|L1	Hsd3b6;Hao2;Hsd3b1;Hsd3b2;Hsd3b3	NM_013821;NM_008293;NM_019545;NM_001012306;NM_001161742;NM_001161743;NM_001161744;NM_001161745;NM_153193
NTG	chr3	99214526	99214725	200	99214618	7	4.49972	3.68081	1.26959	Intergenic	L1Md_T|LINE|L1	Tbx15	NM_009323
NTG	chr3	102616657	102616856	200	102616668	6	4.74446	3.92754	1.36794	Intergenic	L1Md_T|LINE|L1	Tspan2;Tshb;Tspan2os;Sycp1	NM_027533;NR_040588;NM_001165940;NM_011516;NM_001243132;NM_009432;NM_001165939
NTG	chr3	106657924	106658196	273	106658036	7	5.75922	4.48861	1.97086	Intergenic	L1Md_F2|LINE|L1	Cd53;Olfr266	NM_146489;NM_007651
NTG	chr3	110124328	110124588	261	110124475	6	5.47134	4.36855	1.77764	Intergenic	L1Md_T|LINE|L1	Prmt6	NR_024139;NM_178891
NTG	chr3	111580371	111580570	200	111580478	9	9.97828	6.77875	5.4652	Intergenic	(TTCTC)n|Simple_repeat|Simple_repeat
NTG	chr3	116734803	116735064	262	116734998	8	8.12707	5.81545	3.77667	Intergenic	L1Md_T|LINE|L1	Palmd;1700061I17Rik;4930455H04Rik	NR_038029;NM_023245;NR_040596
NTG	chr3	117237039	117237303	265	117237185	5	4.62936	3.87697	1.36015	Intergenic	L1Md_F2|LINE|L1	Lppr5	NM_029425
NTG	chr3	123743586	123743785	200	123743749	9	6.88656	4.95792	2.77038	Intergenic	L1Md_A|LINE|L1
NTG	chr3	123868005	123868235	231	123868122	8	6.48191	4.83737	2.42644	Intergenic	L1Md_A|LINE|L1
NTG	chr3	127477300	127477499	200	127477454	7	7.37347	5.423	3.10364	Intron	L1Md_A|LINE|L1	Alpk1	NM_027808
NTG	chr3	133520878	133521091	214	133521031	7	7.37347	5.423	3.10364	Intergenic	L1Md_T|LINE|L1
NTG	chr3	134721211	134721505	295	134721344	6	5.74046	4.52313	1.97086	Intergenic	L1Md_F|LINE|L1
NTG	chr3	139483626	139483825	200	139483768	11	6.97193	4.67914	2.82963	Intergenic	L1Md_A|LINE|L1
NTG	chr3	143398191	143398410	220	143398362	11	9.38509	6.18957	4.91355	Intergenic	(GAAA)n|Simple_repeat|Simple_repeat	Gm6260	NR_040405
NTG	chr3	144493658	144494124	467	144494054	8	7.63555	5.53563	3.33946	Intron	L1Md_T|LINE|L1	Clca4	NM_139148
NTG	chr3	144520021	144520253	233	144520197	8	8.65321	6.10087	4.23101	Intergenic	L1_Mus1|LINE|L1	Clca4;Clca2;Clca1;Clca6;AI747448;Gm6289	NM_139148;NM_207208;NM_001039222;NM_001033199;NM_030601;NM_009899
NTG	chr3	146020956	146021155	200	146021028	7	7.37347	5.423	3.10364	Intergenic	L1Md_T|LINE|L1	Ctbs;Lpar3;Spata1;Gm10636;Ssx2ip	NM_138744;NM_001293672;NM_022983;NM_027617;NM_001253770;NR_033542;NM_001253768;NM_001253769;NM_028836
NTG	chr3	147024194	147024601	408	147024452	8	8.12707	5.81545	3.77667	Intergenic	L1Md_A|LINE|L1
NTG	chr3	147330643	147330966	324	147330921	9	6.3263	4.60102	2.3016	Intergenic	(GAAA)n|Simple_repeat|Simple_repeat
NTG	chr3	149265722	149265928	207	149265761	9	7.93401	5.61077	3.60345	Intergenic	polypyrimidine|Low_complexity|Low_complexity
NTG	chr3	155366276	155366475	200	155366327	7	7.37347	5.423	3.10364	Intergenic	L1Md_F2|LINE|L1
NTG	chr3	156629059	156629258	200	156629143	8	8.12707	5.81545	3.77667	Intron	L1Md_A|LINE|L1	Negr1	NM_177274;NM_001039094
NTG	chr3	159319237	159319436	200	159319343	8	8.12707	5.81545	3.77667	Intergenic	L1Md_T|LINE|L1	Rpe65	NM_029987
NTG	chr4	4861841	4862093	253	4862021	9	6.88656	4.95792	2.77038	Intergenic	L1Md_A|LINE|L1
NTG	chr4	4970816	4971078	263	4970930	12	6.79204	4.39825	2.71632	Intergenic	L1Md_A|LINE|L1
NTG	chr4	7797999	7798198	200	7798129	8	8.65321	6.10087	4.23101	Intergenic	L1Md_T|LINE|L1
NTG	chr4	8120209	8120495	287	8120409	10	9.08475	6.17184	4.62779	Intron	L1Md_Gf|LINE|L1	Car8	NM_007592
NTG	chr4	8372393	8372592	200	8372463	9	7.93401	5.61077	3.60345	Intergenic	L1_Mus1|LINE|L1	Rab2a	NM_021518
NTG	chr4	9648836	9649091	256	9649004	9	9.39086	6.46161	4.91452	Intergenic	L1Md_T|LINE|L1	Asph;4930412C18Rik	NM_023066;NM_001290367;NR_030693;NM_001177855;NM_001177854;NM_001177856;NM_001177851;NM_001177850;NM_001177853;NM_001177852;NM_133723;NM_001177849
NTG	chr4	11324358	11324561	204	11324400	7	7.37347	5.423	3.10364	Intergenic	(CATA)n|Simple_repeat|Simple_repeat	Esrp1;Dpy19l4;1110037F02Rik	NM_001290383;NM_194055;NM_001081201;NM_001081183
NTG	chr4	12130927	12131126	200	12131032	7	7.37347	5.423	3.10364	Intergenic	L1VL1|LINE|L1	Fam92a;Rbm12b1	NM_026558;NM_028226
NTG	chr4	12771883	12772110	228	12772047	6	5.36399	4.30549	1.69697	Intergenic	L1Md_T|LINE|L1	Triqk	NM_173746;NM_001171801
NTG	chr4	12938832	12939031	200	12938862	9	6.0766	4.44117	2.14251	Intergenic	L1Md_T|LINE|L1	Triqk	NM_173746;NM_001171801
NTG	chr4	14605048	14605279	232	14605133	12	9.36316	5.98132	4.8935	Intron	L1Md_T|LINE|L1	Lrrc69	NM_028499
NTG	chr4	15781231	15781499	269	15781372	12	11.4954	7.29399	6.91875	Intergenic	L1Md_A|LINE|L1	Mir6400;Decr1;Calb1	NM_026172;NM_009788;NR_105826
NTG	chr4	16473803	16474034	232	16473972	8	8.12707	5.81545	3.77667	Intergenic	L1Md_T|LINE|L1
NTG	chr4	17146389	17146597	209	17146526	9	7.55076	5.37485	3.27001	Intergenic	L1Md_T|LINE|L1
NTG	chr4	17235243	17235547	305	17235395	9	5.2296	3.89928	1.58893	Intergenic	L1Md_T|LINE|L1
NTG	chr4	17378765	17378965	201	17378927	8	8.65321	6.10087	4.23101	Intergenic	L1Md_T|LINE|L1
NTG	chr4	19119073	19119272	200	19119152	9	7.93401	5.61077	3.60345	Intergenic	L1Md_T|LINE|L1	Cngb3	NM_013927
NTG	chr4	19595473	19595672	200	19595499	8	5.39072	4.14092	1.70816	Intron	L1Md_A|LINE|L1	Wwp1	NM_177327;NM_001276292;NR_074089;NR_074090
NTG	chr4	19675736	19676009	274	19675825	10	6.08233	4.28921	2.14251	Intergenic	L1Md_T|LINE|L1	Slc7a13;Wwp1	NM_177327;NM_028746;NM_001276292;NR_074089;NR_074090
NTG	chr4	20756150	20756392	243	20756265	6	6.14427	4.74512	2.14251	Intergenic	L1Md_A|LINE|L1	Nkain3	NM_172987;NM_001290410
NTG	chr4	21182477	21182708	232	21182616	7	6.09534	4.69467	2.14251	Intergenic	L1Md_T|LINE|L1
NTG	chr4	21330094	21330357	264	21330249	7	6.09534	4.69467	2.14251	Intergenic	L1Md_T|LINE|L1
NTG	chr4	21579077	21579320	244	21579220	7	7.37347	5.423	3.10364	Intergenic	L1Md_T|LINE|L1	Prdm13;Ccnc	NM_001080771;NM_001290422;NM_016746;NM_001290420;NM_001122982
NTG	chr4	22467435	22467780	346	22467540	8	6.48191	4.83737	2.42644	Intergenic	L1Md_T|LINE|L1	Pou3f2	NM_008899
NTG	chr4	24016252	24016493	242	24016353	9	7.93401	5.61077	3.60345	Intergenic	L1Md_T|LINE|L1
NTG	chr4	24069873	24070072	200	24069946	7	7.37347	5.423	3.10364	Intergenic	L1_Mus1|LINE|L1
NTG	chr4	24224690	24224889	200	24224779	7	7.37347	5.423	3.10364	Intergenic	L1Md_T|LINE|L1
NTG	chr4	25657402	25657669	268	25657473	8	6.82411	5.04969	2.71632	Intron	L1Md_A|LINE|L1	Fut9	NM_010243
NTG	chr4	28286302	28286501	200	28286428	8	7.63555	5.53563	3.33946	Intergenic	L1_Mus2|LINE|L1
NTG	chr4	31281200	31281407	208	31281376	79	11.8207	2.39056	7.23444	Intergenic	ORR1B1|LTR|MaLR
NTG	chr4	31984049	31984272	224	31984208	7	5.75922	4.48861	1.97086	Intergenic	L1Md_A|LINE|L1	Map3k7	NM_172688;NM_009316
NTG	chr4	32614164	32614394	231	32614224	7	7.37347	5.423	3.10364	Intron	(GAAA)n|Simple_repeat|Simple_repeat	Bach2	NM_001109661
NTG	chr4	34394077	34394276	200	34394168	7	7.37347	5.423	3.10364	Intergenic	L1Md_A|LINE|L1
NTG	chr4	36697594	36697830	237	36697791	7	5.75922	4.48861	1.97086	Intron	L1Md_A|LINE|L1	Lingo2	NM_001165999
NTG	chr4	37569389	37569605	217	37569493	7	4.49972	3.68081	1.26959	Intergenic	L1_Mus2|LINE|L1
NTG	chr4	38267503	38267790	288	38267659	8	7.63555	5.53563	3.33946	Intergenic	L1Md_T|LINE|L1
NTG	chr4	43727400	43727657	258	43727567	10	9.55709	6.45517	5.07275	Intergenic	polypyrimidine|Low_complexity|Low_complexity	Npr2;5430416O09Rik;Spag8;Olfr29-ps1;Olfr159;Fam221b;Olfr70;Olfr71;Tmem8b;A630077J23Rik;Hrct1;Hint2	NM_019486;NM_019476;NM_019485;NM_175517;NM_026871;NM_001290462;NM_001007463;NM_001085508;NM_027511;NR_040667;NR_033355;NM_173788;NR_033638
NTG	chr4	48811290	48811532	243	48811341	7	5.75922	4.48861	1.97086	Intergenic	L1Md_T|LINE|L1
NTG	chr4	51295955	51296154	200	51296026	7	5.75922	4.48861	1.97086	Intergenic	(TTTC)n|Simple_repeat|Simple_repeat	Cylc2	NM_001162865
NTG	chr4	51315246	51315476	231	51315358	8	6.82411	5.04969	2.71632	Intergenic	L1Md_A|LINE|L1	Cylc2	NM_001162865
NTG	chr4	51509292	51509503	212	51509461	8	8.65321	6.10087	4.23101	Intergenic	L1Md_T|LINE|L1
NTG	chr4	52078030	52078249	220	52078163	9	8.84168	6.1507	4.40595	Intergenic	L1Md_T|LINE|L1	C630028M04Rik	NR_040668
NTG	chr4	52832654	52832853	200	52832738	7	7.37347	5.423	3.10364	Intron	(CA)n|Simple_repeat|Simple_repeat	4930552N02Rik	NR_040661
NTG	chr4	53470336	53470588	253	53470508	15	9.45639	5.41323	4.97785	Intron	(TG)n|Simple_repeat|Simple_repeat	Slc44a1	NM_133891;NM_001159633
NTG	chr4	54166788	54167014	227	54166888	10	7.30242	5.06112	3.10364	Intergenic	L1Md_A|LINE|L1
NTG	chr4	55878868	55879087	220	55878959	6	5.36399	4.30549	1.69697	Intergenic	L1Md_T|LINE|L1
NTG	chr4	56570263	56570554	292	56570385	5	4.31021	3.69042	1.11332	Intergenic	L1Md_A|LINE|L1
NTG	chr4	61058394	61058593	200	61058437	7	7.37347	5.423	3.10364	Intron	L1Md_F|LINE|L1	Mup2	NM_001286096;NM_001045550
NTG	chr4	61059237	61059436	200	61059309	8	8.12707	5.81545	3.77667	Intron	L1Md_F|LINE|L1	Mup2	NM_001286096;NM_001045550
NTG	chr4	61422677	61422879	203	61422841	8	6.82411	5.04969	2.71632	Intergenic	Intergenic	Mup5;LOC100048884;Mup19	NM_001135127;NM_008649;NM_001199333
NTG	chr4	67503668	67503951	284	67503734	7	7.37347	5.423	3.10364	Intergenic	L1Md_T|LINE|L1
NTG	chr4	72065903	72066151	249	72065979	7	6.90854	5.16929	2.77038	Intergenic	L1Md_T|LINE|L1
NTG	chr4	72622164	72622381	218	72622272	7	4.49972	3.68081	1.26959	Intergenic	L1Md_F2|LINE|L1
NTG	chr4	73771929	73772193	265	73772003	6	4.74446	3.92754	1.36794	Intron	(GAAA)n|Simple_repeat|Simple_repeat	Frmd3	NM_172869;NM_001163732
NTG	chr4	74094868	74095067	200	74094959	7	7.10097	5.27597	2.95153	Intergenic	L1Md_T|LINE|L1	Kdm4c	NM_144787;NM_001172095
NTG	chr4	74288711	74289032	322	74288888	12	9.36316	5.98132	4.8935	Intergenic	L1Md_A|LINE|L1
NTG	chr4	74999111	74999332	222	74999154	9	7.93401	5.61077	3.60345	Intergenic	L1Md_A|LINE|L1	Tmem261	NM_025849
NTG	chr4	75144714	75144928	215	75144770	9	9.97828	6.77875	5.4652	Intergenic	L1Md_T|LINE|L1
NTG	chr4	77623767	77623966	200	77623913	7	7.37347	5.423	3.10364	Intron	L1Md_T|LINE|L1	Ptprd	NM_011211
NTG	chr4	77624230	77624429	200	77624274	7	4.49972	3.68081	1.26959	Intron	L1Md_T|LINE|L1	Ptprd	NM_011211
NTG	chr4	79275139	79275338	200	79275230	6	4.74446	3.92754	1.36794	Intergenic	L1Md_A|LINE|L1
NTG	chr4	86289298	86289537	240	86289458	7	5.75922	4.48861	1.97086	Intergenic	L1Md_F2|LINE|L1	Fam154a;Haus6;Plin2;Rraga;Scarna8	NR_028545;NM_173400;NM_178376;NM_001081096;NM_007408
NTG	chr4	89782124	89782323	200	89782252	9	7.93401	5.61077	3.60345	Intergenic	L1Md_T|LINE|L1
NTG	chr4	90393089	90393288	200	90393265	43	8.483	2.64332	4.10576	Intergenic	Lx3_Mus|LINE|L1
NTG	chr4	90654633	90654873	241	90654832	8	6.82411	5.04969	2.71632	Intergenic	L1Md_T|LINE|L1
NTG	chr4	94510628	94510852	225	94510712	9	8.36088	5.86834	3.98927	Intron	L1Md_T|LINE|L1	Tek	NM_001290549;NM_013690;NM_001290551
NTG	chr4	95647351	95647617	267	95647456	8	8.65321	6.10087	4.23101	Intron	L1Md_F3|LINE|L1	Hook1	NM_030014
NTG	chr4	95835387	95835586	200	95835455	7	6.4746	4.92056	2.42617	Intergenic	L1Md_T|LINE|L1	Cyp2j12;Cyp2j13	NM_145548;NM_001100182
NTG	chr4	96987149	96987348	200	96987176	6	6.14427	4.74512	2.14251	Intergenic	L1Md_T|LINE|L1
NTG	chr4	98867807	98868082	276	98867949	9	6.3263	4.60102	2.3016	Intron	intron (NM_175029, intron 1 of 10)	Atg4c	NM_175029;NM_001145967
NTG	chr4	105296273	105296658	386	105296444	12	9.36316	5.98132	4.8935	Intergenic	L1Md_T|LINE|L1
NTG	chr4	110285545	110285864	320	110285636	8	8.65321	6.10087	4.23101	Intron	L1Md_A|LINE|L1	Agbl4	NM_001048189;NM_030231;NM_001284190
NTG	chr4	110362615	110362849	235	110362735	10	9.08475	6.17184	4.62779	Intron	L1Md_A|LINE|L1	Agbl4	NM_001048189;NM_030231;NM_001284190
NTG	chr4	110363928	110364183	256	110364060	9	7.93401	5.61077	3.60345	Intron	L1Md_A|LINE|L1	Agbl4	NM_001048189;NM_030231;NM_001284190
NTG	chr4	110389521	110389750	230	110389636	7	4.49972	3.68081	1.26959	Intron	L1Md_T|LINE|L1	Agbl4	NM_001048189;NM_030231;NM_001284190
NTG	chr4	111530278	111530680	403	111530374	6	6.14427	4.74512	2.14251	Intergenic	L1Md_T|LINE|L1	Slc5a9;Spata6;Skint8	NM_145551;NM_001100466;NM_026470
NTG	chr4	111606806	111607005	200	111606950	8	7.20556	5.28151	3.03975	Intron	L1Md_T|LINE|L1	Skint8	NM_001100466
NTG	chr4	112020600	112020799	200	112020613	6	5.36399	4.30549	1.69697	Intergenic	L1Md_T|LINE|L1	Skint9;Skint3	NM_177864;NM_177578;NM_001102474
NTG	chr4	112655919	112656203	285	112656055	12	11.4954	7.29399	6.91875	Intron	L1Md_T|LINE|L1	Skint6	NM_001103199
NTG	chr4	115011482	115011681	200	115011572	10	7.30242	5.06112	3.10364	Intergenic	L1Md_T|LINE|L1	Cyp4a29;Cyp4a12b;Cyp4a12a	NM_177406;NM_172306;NM_001100183
NTG	chr4	118219715	118219950	236	118219939	72	5.92675	1.80222	2.1264	Promoter	G-rich|Low_complexity|Low_complexity	Tmem125	NM_172383
NTG	chr4	118220398	118220732	335	118220556	105	6.43981	1.66711	2.41068	Promoter	G-rich|Low_complexity|Low_complexity	Tmem125	NM_172383
NTG	chr4	121104311	121104651	341	121104526	10	7.30242	5.06112	3.10364	Intergenic	L1Md_F2|LINE|L1	Gm12886	NM_001144948
NTG	chr4	129634985	129635206	222	129635086	28	13.4376	5.09332	8.80505	Promoter	(TTTC)n|Simple_repeat|Simple_repeat	1700003M07Rik	NR_040648;NR_040647
NTG	chr4	144019339	144019650	312	144019515	12	11.4954	7.29399	6.91875	Intron	(GAA)n|Simple_repeat|Simple_repeat	1700012P22Rik	NM_027056
NTG	chr4	144439757	144439956	200	144439842	9	7.55076	5.37485	3.27001	Intergenic	L1Md_F2|LINE|L1	Gm438;Dhrs3	NM_011303;NM_001126316;NM_001172424
NTG	chr4	145597583	145597782	200	145597603	9	5.2296	3.89928	1.58893	Intergenic	L1_Mur1|LINE|L1	Gm13247;1700095A21Rik	NR_045468;NM_001243138;NM_001243139
NTG	chr4	146435153	146435352	200	146435231	12	6.79204	4.39825	2.71632	Intergenic	TTS (NM_001177767).2	4933438K21Rik;Rex2;Gm13139;Znf41-ps	NM_001177767;NR_040355;NR_045446;NM_001083918
NTG	chr4	150898138	150898393	256	150898214	8	8.65321	6.10087	4.23101	Intron	intron (NM_001081557, intron 4 of 23)	Camta1	NM_001081557
NTG	chr4	152527043	152527398	356	152527205	106	9.0668	1.87938	4.61949	Intergenic	(TTAGGG)n|Simple_repeat|Simple_repeat
NTG	chr5	4602276	4602485	210	4602345	9	8.84168	6.1507	4.40595	Intergenic	L1Md_T|LINE|L1
NTG	chr5	7767561	7767798	238	7767779	6	6.14427	4.74512	2.14251	Intergenic	L1Md_F2|LINE|L1
NTG	chr5	11066295	11066494	200	11066452	7	7.37347	5.423	3.10364	Intergenic	L1Md_A|LINE|L1
NTG	chr5	11635252	11635451	200	11635334	6	4.74446	3.92754	1.36794	Intergenic	L1_Mm|LINE|L1	Gm6460	NM_001037919
NTG	chr5	15288714	15289017	304	15288889	8	8.65321	6.10087	4.23101	Intergenic	L1Md_T|LINE|L1	4930519H02Rik;Speer7-ps1;Speer4c	NM_001281511;NR_001585;NR_045974
NTG	chr5	17807622	17807849	228	17807741	8	8.65321	6.10087	4.23101	Intron	L1Md_T|LINE|L1	Gnai1	NM_010305
NTG	chr5	19629538	19629737	200	19629663	7	7.37347	5.423	3.10364	Intron	L1Md_T|LINE|L1	Magi2	NM_015823;NM_001170745;NM_001170746
NTG	chr5	21721215	21721414	200	21721336	6	5.03536	4.10784	1.41082	Intron	L1Md_A|LINE|L1	Reln	NM_011261
NTG	chr5	22205621	22205919	299	22205845	8	8.12707	5.81545	3.77667	Intergenic	L1Md_F2|LINE|L1	A930003O13Rik;Lhfpl3	NM_029990;NM_001081231;NR_027362
NTG	chr5	23022256	23022518	263	23022395	10	9.08475	6.17184	4.62779	Intron	(GAAA)n|Simple_repeat|Simple_repeat	Srpk2	NM_009274
NTG	chr5	26708261	26708478	218	26708441	10	7.30242	5.06112	3.10364	Intergenic	L1Md_T|LINE|L1	4930584F24Rik	NR_029445
NTG	chr5	28197606	28197805	200	28197743	7	7.37347	5.423	3.10364	Intergenic	L1Md_F2|LINE|L1	Htr5a;Paxip1	NM_018878;NM_008314
NTG	chr5	37051946	37052409	464	37052280	94	17.703	2.77395	12.9848	Intron	intron (NM_001081232, intron 2 of 7)	D5Ertd579e	NM_001081232
NTG	chr5	37962546	37962768	223	37962658	9	9.97828	6.77875	5.4652	Intron	(GAAA)n|Simple_repeat|Simple_repeat	Stk32b	NM_022416
NTG	chr5	39897092	39897348	257	39897175	8	8.12707	5.81545	3.77667	Intron	L1Md_A|LINE|L1	4930513D17Rik	NR_045416
NTG	chr5	41882611	41882843	233	41882796	7	7.37347	5.423	3.10364	Intergenic	L1Md_T|LINE|L1
NTG	chr5	43096335	43096534	200	43096460	6	6.14427	4.74512	2.14251	Intergenic	L1Md_A|LINE|L1
NTG	chr5	43128561	43128760	200	43128640	10	7.30242	5.06112	3.10364	Intergenic	L1Md_T|LINE|L1
NTG	chr5	45800686	45800885	200	45800840	6	6.14427	4.74512	2.14251	Intergenic	L1Md_T|LINE|L1	Qdpr;Lap3;Clrn2	NM_001163317;NM_024434;NM_024236
NTG	chr5	46240560	46240827	268	46240632	8	6.82411	5.04969	2.71632	Intron	L1Md_T|LINE|L1	Lcorl	NM_001163073;NM_172153;NM_178142
NTG	chr5	46466826	46467025	200	46466907	10	7.30242	5.06112	3.10364	Intergenic	(TTTTC)n|Simple_repeat|Simple_repeat
NTG	chr5	48915639	48915868	230	48915696	9	7.93401	5.61077	3.60345	Intron	L1Md_T|LINE|L1	Kcnip4	NM_030265;NM_001199244;NM_001199245
NTG	chr5	50143891	50144148	258	50143962	7	7.37347	5.423	3.10364	Intergenic	L1Md_A|LINE|L1
NTG	chr5	56073420	56073664	245	56073494	7	7.37347	5.423	3.10364	Intergenic	L1_Mm|LINE|L1
NTG	chr5	57384987	57385280	294	57385144	9	6.3263	4.60102	2.3016	Intergenic	L1Md_T|LINE|L1
NTG	chr5	58040095	58040294	200	58040151	8	6.48191	4.83737	2.42644	Intron	L1Md_A|LINE|L1	4932441J04Rik	NR_015588
NTG	chr5	58638134	58638430	297	58638271	10	11.3444	7.45662	6.77284	Intergenic	L1Md_T|LINE|L1
NTG	chr5	59329998	59330198	201	59330071	8	8.65321	6.10087	4.23101	Intergenic	L1Md_T|LINE|L1
NTG	chr5	62989575	62989790	216	62989616	8	7.20556	5.28151	3.03975	Intergenic	(TTTC)n|Simple_repeat|Simple_repeat	Arap2	NM_178407
NTG	chr5	71154651	71155040	390	71154846	8	8.65321	6.10087	4.23101	Intron	L1Md_T|LINE|L1	Gabrg1	NM_010252
NTG	chr5	71949656	71950010	355	71949888	7	6.90854	5.16929	2.77038	Intergenic	L1Md_T|LINE|L1	Gabra4;Cox7b2	NM_030052;NM_010251
NTG	chr5	73839547	73839746	200	73839567	5	4.9722	4.06725	1.36794	Intron	(TTTC)n|Simple_repeat|Simple_repeat	Cwh43	NM_181323
NTG	chr5	78584904	78585148	245	78584995	9	9.39086	6.46161	4.91452	Intergenic	L1Md_T|LINE|L1
NTG	chr5	80711906	80712184	279	80712026	7	7.37347	5.423	3.10364	Intergenic	L1Md_A|LINE|L1
NTG	chr5	81637195	81637394	200	81637319	7	7.37347	5.423	3.10364	Intron	L1Md_T|LINE|L1	Lphn3	NM_198702
NTG	chr5	82610085	82610373	289	82610246	8	6.82411	5.04969	2.71632	Intergenic	L1Md_T|LINE|L1
NTG	chr5	83043740	83043939	200	83043790	9	9.97828	6.77875	5.4652	Intergenic	L1Md_A|LINE|L1
NTG	chr5	83697779	83698029	251	83697968	8	7.63555	5.53563	3.33946	Intergenic	L1Md_A|LINE|L1	Tecrl	NM_153801
NTG	chr5	85252276	85252663	388	85252475	11	8.31567	5.52122	3.95108	Intergenic	L1Md_T|LINE|L1
NTG	chr5	85404006	85404304	299	85404064	7	7.37347	5.423	3.10364	Intergenic	L1Md_F3|LINE|L1
NTG	chr5	88840313	88840575	263	88840470	11	10.2729	6.73292	5.74425	Intergenic	L1Md_A|LINE|L1	Amtn;Prol1;Ambn;Enam	NM_009664;NM_008644;NM_017468;NM_027793
NTG	chr5	89303313	89303512	200	89303420	7	5.75922	4.48861	1.97086	Intergenic	L1Md_A|LINE|L1	Slc4a4;Dck	NM_001136260;NM_007832;NM_001197147;NM_018760
NTG	chr5	91340430	91340629	200	91340591	11	10.2729	6.73292	5.74425	Intergenic	L1Md_A|LINE|L1	Cxcl1;Mthfd2l;Cxcl2	NM_009140;NM_026788;NM_008176
NTG	chr5	93718527	93718879	353	93718704	69	12.5618	2.64907	7.95287	Intergenic	(CCCTAA)n|Simple_repeat|Simple_repeat	2010109A12Rik;Ccng2;Ccni	NM_029363;NM_017367;NM_007635
NTG	chr5	93943027	93943277	251	93943192	7	6.72747	5.06684	2.66166	Intergenic	Lx|LINE|L1
NTG	chr5	95182016	95182215	200	95182151	9	7.20354	5.15797	3.03975	Intergenic	Intergenic
NTG	chr5	95194763	95195100	338	95194925	8	5.39072	4.14092	1.70816	Intergenic	L1Md_F2|LINE|L1
NTG	chr5	95284543	95284790	248	95284615	10	10.4426	6.96691	5.90695	Intergenic	L1VL1|LINE|L1
NTG	chr5	95595676	95595898	223	95595824	6	5.66071	4.47786	1.95949	Intergenic	L1_Mur2|LINE|L1	Gm16367	NM_001031622
NTG	chr5	96822484	96822761	278	96822562	7	7.37347	5.423	3.10364	Intron	(TTC)n|Simple_repeat|Simple_repeat	Fras1	NM_175473
NTG	chr5	96992389	96992588	200	96992446	7	7.37347	5.423	3.10364	Intron	L1Md_T|LINE|L1	Fras1	NM_175473
NTG	chr5	105816406	105816687	282	105816665	8	5.88955	4.46213	2.09186	Intergenic	L1Md_F2|LINE|L1	Gbp6;Gbp11;Lrrc8b	NM_194336;NM_001033550;NM_001039647
NTG	chr5	106605814	106606017	204	106605835	64	10.6797	2.49681	6.13585	Intergenic	MIRb|SINE|MIR
NTG	chr5	107603858	107604057	200	107603995	8	8.65321	6.10087	4.23101	Intron	(TTC)n|Simple_repeat|Simple_repeat	Tgfbr3	NM_011578
NTG	chr5	109177050	109177433	384	109177244	37	13.4307	4.12415	8.79877	Intergenic	Intergenic	1700047L14Rik;Fgfrl1;Dgkq;Slc26a1;Vmn2r9;Vmn2r8;Idua;Tmed11	NM_026109;NM_172997;NM_174870;NM_001164259;NM_001104620;NM_001104621;NM_054071;NM_199011;NR_040691;NM_008325
NTG	chr5	126847790	126848098	309	126847836	8	6.82411	5.04969	2.71632	Intergenic	L1Md_A|LINE|L1
NTG	chr5	131818218	131818422	205	131818354	8	8.65321	6.10087	4.23101	Intergenic	L1Md_A|LINE|L1	Auts2;Wbscr17	NM_177047;NM_145218
NTG	chr5	133799788	133799987	200	133799897	6	5.36399	4.30549	1.69697	Intergenic	L1Md_A|LINE|L1
NTG	chr5	134178459	134178675	217	134178503	13	12.2019	7.52479	7.60313	Intergenic	L1Md_F2|LINE|L1
NTG	chr5	139313408	139313626	219	139313577	10	9.08475	6.17184	4.62779	Intergenic	(TATG)n|Simple_repeat|Simple_repeat	Gm5294;Fam20c	NM_001195128;NM_030565
NTG	chr5	146288563	146288820	258	146288642	7	7.37347	5.423	3.10364	Intergenic	L1Md_F2|LINE|L1	Cyp3a16;Cyp3a41b	NM_007820;NM_001105159
NTG	chr5	152537003	152537259	257	152537192	137	13.8936	2.04461	9.25078	Intergenic	(TTAGGG)n|Simple_repeat|Simple_repeat	Rfc3	NM_027009
NTG	chr6	4873987	4874271	285	4874015	59	12.4188	2.86419	7.81346	Intron	(CCCTAA)n|Simple_repeat|Simple_repeat	Ppp1r9a	NM_181595
NTG	chr6	4942948	4943231	284	4943094	12	14.1863	8.81237	9.53534	Intron	(CA)n|Simple_repeat|Simple_repeat	Ppp1r9a	NM_181595
NTG	chr6	6655037	6655285	249	6655094	7	7.37347	5.423	3.10364	Intergenic	L1Md_T|LINE|L1
NTG	chr6	10212996	10213195	200	10213055	7	6.90854	5.16929	2.77038	Intergenic	L1Md_F3|LINE|L1
NTG	chr6	15407299	15407553	255	15407445	8	8.12707	5.81545	3.77667	Intergenic	L1Md_A|LINE|L1	Foxp2	NM_212435;NM_001286607;NM_053242
NTG	chr6	15949419	15949686	268	15949522	8	8.65321	6.10087	4.23101	Intergenic	L1Md_T|LINE|L1
NTG	chr6	16956005	16956295	291	16956180	11	8.31567	5.52122	3.95108	Intergenic	L1Md_F2|LINE|L1	Tes	NM_207176
NTG	chr6	18732493	18732692	200	18732604	5	4.9722	4.06725	1.36794	Intergenic	L1Md_T|LINE|L1	Ankrd7;Lsm8	NM_001167757;NM_029202;NM_133939
NTG	chr6	18851810	18852070	261	18851935	10	11.3444	7.45662	6.77284	Intergenic	L1Md_T|LINE|L1	Ankrd7;Lsm8	NM_001167757;NM_029202;NM_133939
NTG	chr6	19170972	19171171	200	19171041	10	7.30242	5.06112	3.10364	Intergenic	L1Md_F2|LINE|L1
NTG	chr6	21345837	21346149	313	21345926	9	8.84168	6.1507	4.40595	Intron	L1Md_T|LINE|L1	Kcnd2	NM_019697
NTG	chr6	22501707	22501906	200	22501781	11	8.31567	5.52122	3.95108	Intergenic	(CATAT)n|Simple_repeat|Simple_repeat
NTG	chr6	22501980	22502215	236	22502028	12	9.36316	5.98132	4.8935	Intergenic	(CATAT)n|Simple_repeat|Simple_repeat
NTG	chr6	23722350	23722549	200	23722404	7	4.49972	3.68081	1.26959	Intron	L1Md_T|LINE|L1	Cadps2	NM_153163;NM_001252109;NM_001252108;NM_001252110;NM_001252107;NM_001252106;NM_001252105
NTG	chr6	26829418	26829651	234	26829543	9	7.93401	5.61077	3.60345	Intergenic	L1Md_T|LINE|L1
NTG	chr6	29697776	29698571	796	29698420	57	9.11599	2.40889	4.65804	Intron	(CTGTG)n|Simple_repeat|Simple_repeat	Smo	NM_176996
NTG	chr6	35294899	35295098	200	35295029	7	7.37347	5.423	3.10364	Intergenic	L1Md_T|LINE|L1	1700065J11Rik;Fam180a;Slc13a4;1810058I24Rik;Nup205	NM_027513;NR_015608;NM_172892;NM_173375;NR_027875;NR_040526
NTG	chr6	35675592	35675850	259	35675723	9	7.93401	5.61077	3.60345	Intergenic	L1Md_F2|LINE|L1
NTG	chr6	37156873	37157072	200	37156987	7	6.90854	5.16929	2.77038	Intron	(GAA)n|Simple_repeat|Simple_repeat	Dgki	NM_001081206
NTG	chr6	42714661	42714944	284	42714766	8	8.6376	6.09263	4.23101	Intergenic	L1Md_T|LINE|L1	Olfr453;Olfr452;Fam115a;Olfr449;Olfr38;Olfr450	NM_146986;NM_001011869;NM_146445;NM_001011799;NM_147064;NM_029930
NTG	chr6	45434101	45434300	200	45434124	7	6.4746	4.92056	2.42617	Intron	L1Md_T|LINE|L1	Cntnap2	NM_001004357
NTG	chr6	46545031	46545230	200	46545114	8	6.82411	5.04969	2.71632	Intron	L1Md_A|LINE|L1	Cntnap2	NM_001004357
NTG	chr6	47605106	47605313	208	47605178	18	7.85084	4.06265	3.5452	Intergenic	promoter-TSS (NR_002841).5	Ezh2;Rn4.5s	NM_001146689;NM_007971;NR_002841
NTG	chr6	47620468	47620672	205	47620542	19	8.90447	4.42449	4.4643	Intergenic	(TG)n|Simple_repeat|Simple_repeat	Ezh2;Rn4.5s	NM_001146689;NM_007971;NR_002841
NTG	chr6	47696611	47696819	209	47696710	22	9.6203	4.33751	5.13352	Intergenic	RMER12B|LTR|ERVK	Pdia4;Rn4.5s;Mir704;Zfp398;Zfp786	NR_002841;NM_173034;NM_009787;NM_177882;NM_027477;NR_030485
NTG	chr6	49480899	49481143	245	49480970	6	5.99518	4.6646	2.14251	Intergenic	L1Md_T|LINE|L1	Stk31	NM_029916
NTG	chr6	50589015	50589214	200	50589147	7	7.37347	5.423	3.10364	Intergenic	Intergenic	4921507P07Rik;Npvf;5430402O13Rik;Cycs	NR_015581;NR_027892;NM_007808;NM_021892;NM_027564
NTG	chr6	56183513	56183875	363	56183692	88	13.1311	2.40636	8.50654	Intron	(TTAGGG)n|Simple_repeat|Simple_repeat	Pde1c	NM_001025568;NM_011054;NM_001159960;NM_001159955;NM_001159956;NM_001159957;NM_001159952;NM_001159953
NTG	chr6	60138841	60139066	226	60138920	6	4.74446	3.92754	1.36794	Intergenic	L1Md_A|LINE|L1	A530053G22Rik	NR_015565
NTG	chr6	60975531	60975775	245	60975651	8	7.20556	5.28151	3.03975	Intergenic	L1Md_A|LINE|L1	Mmrn1	NM_001163507;NM_027613
NTG	chr6	68972089	68972780	692	68972586	8	8.65321	6.10087	4.23101	Intergenic	L1Md_T|LINE|L1
NTG	chr6	69576538	69576737	200	69576577	7	7.37347	5.423	3.10364	Intergenic	L1Md_F2|LINE|L1
NTG	chr6	69692929	69693128	200	69693120	10	5.17007	3.7216	1.53986	Intergenic	L1Md_F2|LINE|L1
NTG	chr6	70138056	70138263	208	70138076	9	5.2296	3.89928	1.58893	Intergenic	L1Md_Gf|LINE|L1
NTG	chr6	73653492	73653691	200	73653508	6	6.14427	4.74512	2.14251	Intergenic	L1Md_A|LINE|L1
NTG	chr6	74033994	74034193	200	74034038	8	6.82411	5.04969	2.71632	Intergenic	(CA)n|Simple_repeat|Simple_repeat
NTG	chr6	74316475	74316674	200	74316579	8	8.57709	6.06053	4.19624	Intergenic	L1Md_T|LINE|L1
NTG	chr6	76799310	76799509	200	76799431	6	5.36399	4.30549	1.69697	Intergenic	L1Md_A|LINE|L1	Ctnna2	NM_009819;NM_001109764;NM_145732
NTG	chr6	80330759	80331066	308	80330896	10	8.27568	5.67377	3.91576	Intron	L1Md_T|LINE|L1	Lrrtm4	NM_001134743
NTG	chr6	84636225	84636564	340	84636369	8	8.65321	6.10087	4.23101	Intron	L1Md_T|LINE|L1	Exoc6b	NM_177077
NTG	chr6	93330309	93330605	297	93330464	8	8.65321	6.10087	4.23101	Intergenic	L1Md_Gf|LINE|L1
NTG	chr6	95163134	95163413	280	95163319	6	5.58331	4.43349	1.8862	Intergenic	L1Md_T|LINE|L1	AY512915;Kbtbd8	NM_001008785;NM_001102670;NR_033559
NTG	chr6	96245947	96246191	245	96246002	9	9.39086	6.46161	4.91452	Intron	L1Md_T|LINE|L1	Fam19a1	NM_182808
NTG	chr6	98835789	98835988	200	98835905	6	5.74046	4.52313	1.97086	Intergenic	L1Md_F2|LINE|L1	Foxp1	NM_053202;NM_001197321;NM_001197322
NTG	chr6	101773725	101773977	253	101773812	10	7.30242	5.06112	3.10364	Intergenic	L1Md_A|LINE|L1	Gm9871	NR_027989
NTG	chr6	103264633	103264841	209	103264670	105	8.32505	1.82422	3.9599	Intergenic	RSINE1|SINE|B4
NTG	chr6	105614833	105615079	247	105615000	9	8.84168	6.1507	4.40595	Intergenic	L1Md_T|LINE|L1	Cntn4	NM_001109749;NM_173004
NTG	chr6	107435072	107435290	219	107435151	9	8.84168	6.1507	4.40595	Intergenic	L1Md_T|LINE|L1	Lrrn1	NM_008516
NTG	chr6	107617820	107618075	256	107617888	7	7.35966	5.41567	3.10364	Intergenic	L1Md_A|LINE|L1	Lrrn1	NM_008516
NTG	chr6	108976729	108976937	209	108976845	8	6.82411	5.04969	2.71632	Intergenic	L1Md_A|LINE|L1
NTG	chr6	117348520	117348980	461	117348597	8	8.65321	6.10087	4.23101	Intergenic	L1Md_T|LINE|L1
NTG	chr6	117644405	117644604	200	117644544	6	5.74046	4.52313	1.97086	Intron	L1Md_T|LINE|L1	1700030F04Rik	NR_045731
NTG	chr6	125976571	125976791	221	125976619	6	5.03536	4.10784	1.41082	Intron	L1Md_A|LINE|L1	Ano2	NM_153589
NTG	chr6	128698705	128698980	276	128698872	8	6.82411	5.04969	2.71632	Intergenic	(TTTC)n|Simple_repeat|Simple_repeat	Clec2h;Klrb1;BC035044;Klrb1b;Klrb1c	NM_001254946;NM_053165;NM_001099918;NM_030599;NM_001159904;NM_008527
NTG	chr6	131519979	131520241	263	131520131	10	10.0888	6.76577	5.56994	Intergenic	L1Md_T|LINE|L1	Tas2r130;Tas2r107;5430401F13Rik	NM_199154;NM_199156;NM_001244628
NTG	chr6	131714148	131714351	204	131714269	10	9.08475	6.17184	4.62779	Intergenic	L1Md_A|LINE|L1	Tas2r114;Tas2r105;Tas2r104;Tas2r106	NM_207016;NM_020501;NM_207011;NM_207019
NTG	chr6	132789124	132789354	231	132789245	10	10.6957	7.10777	6.14976	Intergenic	L1Md_T|LINE|L1	Tas2r123;Tas2r117;Tas2r110;Tas2r136;Tas2r124;Tas2r116;Tas2r125;Tas2r102;Tas2r113	NM_181276;NM_207018;NM_053212;NM_199155;NM_199153;NM_207021;NM_207026;NM_207027;NM_207025
NTG	chr6	132789545	132789748	204	132789623	7	5.75922	4.48861	1.97086	Intergenic	L1Md_T|LINE|L1	Tas2r123;Tas2r117;Tas2r110;Tas2r136;Tas2r124;Tas2r116;Tas2r125;Tas2r102;Tas2r113	NM_181276;NM_207018;NM_053212;NM_199155;NM_199153;NM_207021;NM_207026;NM_207027;NM_207025
NTG	chr6	136750335	136750691	357	136750489	7	5.75922	4.48861	1.97086	Intergenic	3' UTR (NM_175652, exon 1 of 1)	Smco3;Hist4h4;Art4;Wbp11;Mgp;Gucy2c;BC049715;H2afj	NM_001039558;NM_145067;NM_178776;NM_008597;NM_001127318;NM_021714;NM_026639;NM_175652;NM_177688
NTG	chr6	136923715	136923914	200	136923723	6	6.14427	4.74512	2.14251	Intergenic	L1Md_T|LINE|L1	Pde6h;Mgp;Arhgdib;Rerg;Erp27	NM_026983;NM_008597;NM_023898;NM_007486;NM_001301303;NM_181988;NM_001301301;NM_001301305;NM_001164212;NM_001301308;NM_001301309;NM_001164214
NTG	chr6	141160437	141160641	205	141160446	8	6.82411	5.04969	2.71632	Intergenic	L1Md_A|LINE|L1	Pde3a	NM_018779
NTG	chr6	143162101	143162370	270	143162273	11	8.31567	5.52122	3.95108	Intergenic	RLTR28|LTR|ERVL	D6Ertd474e;Etnk1	NR_027803;NM_029250
NTG	chr7	4238148	4238374	227	4238287	10	8.27568	5.67377	3.91576	Intergenic	L1VL4|LINE|L1	Gp6;Lilra5;Pira6;Ncr1	NM_011093;NM_010746;NM_001163014;NM_001081239;NM_008848
NTG	chr7	5813402	5813666	265	5813542	10	10.6957	7.10777	6.14976	Intergenic	L1Md_T|LINE|L1	Vmn1r64	NM_207544
NTG	chr7	8177608	8177836	229	8177730	7	7.37347	5.423	3.10364	Intergenic	L1Md_A|LINE|L1
NTG	chr7	8355807	8356032	226	8355951	10	7.30242	5.06112	3.10364	Intergenic	L1Md_Gf|LINE|L1	Vmn2r46	NM_001105076
NTG	chr7	10101068	10101267	200	10101146	6	5.74046	4.52313	1.97086	Intergenic	L1Md_F2|LINE|L1	2810047C21Rik1	NR_015598
NTG	chr7	14201991	14202190	200	14202048	6	6.14427	4.74512	2.14251	Intergenic	L1Md_T|LINE|L1	Bsph2;Sult2a5	NM_001080942;NM_001184980
NTG	chr7	14990660	14990859	200	14990784	7	5.18555	4.12638	1.55025	Intergenic	L1Md_A|LINE|L1	Sult2a7;2810007J24Rik	NM_001199306;NM_001184981;NM_175250
NTG	chr7	16056847	16057106	260	16056971	11	6.97193	4.67914	2.82963	Intergenic	L1Md_A|LINE|L1	Obox1	NM_027802
NTG	chr7	21244746	21245134	389	21245073	7	5.75922	4.48861	1.97086	Intergenic	L1Md_F2|LINE|L1	Gm8693;Vmn1r155	NM_001167154;NM_001166753
NTG	chr7	21683089	21683345	257	21683273	8	6.82411	5.04969	2.71632	Intergenic	MusHAL1|LINE|L1	Vmn1r114;Vmn1r115;Vmn1r116;Vmn1r117	NM_001166837;NM_001166744;NM_001166743;NM_001166745
NTG	chr7	23087455	23087799	345	23087630	9	9.27466	6.39694	4.81076	Intergenic	L1Md_A|LINE|L1	Gm4133;Gm5728;Vmn1r-ps79;Gm4187;Vmn1r118;Gm8660	NM_001166713;NM_001166751;NR_030707;NM_001166742;NM_001167159;NM_001167158
NTG	chr7	23234241	23234440	200	23234302	7	6.09534	4.69467	2.14251	Intergenic	L1Md_A|LINE|L1	Vmn1r151;Vmn1r152;Gm5726;Gm5728;Vmn1r149;Vmn1r148;Vmn1r-ps79;Gm10670;Gm8677;Gm8660;Gm10665;Vmn1r101;Vmn1r100	NM_001166712;NM_001166713;NM_001166840;NM_001167160;NM_001166836;NM_001166844;NR_030707;NM_001166752;NM_001166751;NM_001167147;NM_001167146;NM_030736;NM_001167161
NTG	chr7	24379295	24379497	203	24379375	9	7.55076	5.37485	3.27001	Intergenic	L1Md_T|LINE|L1	Vmn1r172;Vmn1r170;Vmn1r171;Vmn1r169;Vmn1r168;Vmn1r167	NM_001166842;NM_001166843;NM_001166722;NM_030737;NM_001101562;NM_030735
NTG	chr7	34541625	34541856	232	34541774	8	7.63555	5.53563	3.33946	Intergenic	L1Md_T|LINE|L1	Scgb1b24;Scgb2b24	NM_001099329;NM_177446
NTG	chr7	46768742	46768965	224	46768830	9	8.84168	6.1507	4.40595	Promoter	L1Md_T|LINE|L1	Zfp619	NM_001004139
NTG	chr7	47487963	47488243	281	47488155	7	6.90854	5.16929	2.77038	Intergenic	L1Md_A|LINE|L1
NTG	chr7	49001847	49002068	222	49001949	8	6.82411	5.04969	2.71632	Intergenic	L1Md_A|LINE|L1	Zfp788;Vmn2r58;Vmn2r-ps54	NM_023363;NR_004441;NM_001105055
NTG	chr7	54732314	54732513	200	54732384	8	8.12707	5.81545	3.77667	Intron	L1Md_F2|LINE|L1	Mrgpra2b	NM_153101
NTG	chr7	58331963	58332462	500	58332157	9	9.39086	6.46161	4.91452	Intergenic	L1Md_A|LINE|L1
NTG	chr7	60785408	60785611	204	60785443	11	11.3733	7.38084	6.80084	Intergenic	L1Md_T|LINE|L1
NTG	chr7	62180521	62180768	248	62180622	8	8.65321	6.10087	4.23101	Intron	L1Md_T|LINE|L1	Luzp2	NM_178705
NTG	chr7	62393967	62394211	245	62394065	10	9.08475	6.17184	4.62779	Intron	L1Md_T|LINE|L1	Luzp2	NM_178705
NTG	chr7	62946010	62946317	308	62946136	8	8.18027	5.845	3.82675	Intergenic	L1Md_A|LINE|L1	Siglech	NM_178706
NTG	chr7	63525057	63525435	379	63525300	10	10.6957	7.10777	6.14976	Intron	L1Md_F2|LINE|L1	Oca2	NM_021879
NTG	chr7	63592419	63592618	200	63592566	6	6.14427	4.74512	2.14251	Intron	IAPEz-int|LTR|ERVK	Oca2	NM_021879
NTG	chr7	64208597	64208796	200	64208678	6	4.74446	3.92754	1.36794	Intron	L1Md_A|LINE|L1	Gabrg3	NM_008074
NTG	chr7	64278234	64278433	200	64278284	7	5.75922	4.48861	1.97086	Intron	L1Md_A|LINE|L1	Gabrg3	NM_008074
NTG	chr7	65184980	65185346	367	65185087	8	6.82411	5.04969	2.71632	Intergenic	L1Md_Gf|LINE|L1
NTG	chr7	68257963	68258256	294	68258092	9	8.84168	6.1507	4.40595	Intergenic	(TTC)n|Simple_repeat|Simple_repeat
NTG	chr7	74136742	74136984	243	74136908	6	6.14427	4.74512	2.14251	Intron	RLTR10-int|LTR|ERVK	Adamts17	NM_001033877
NTG	chr7	75859558	75859757	200	75859665	9	7.93401	5.61077	3.60345	Intergenic	Intergenic	Arrdc4;Gm5334	NR_003648;NM_025549;NM_001042592
NTG	chr7	76212369	76212568	200	76212467	8	6.82411	5.04969	2.71632	Intergenic	L1Md_F3|LINE|L1
NTG	chr7	79632556	79632909	354	79632825	7	6.09534	4.69467	2.14251	Intergenic	L1Md_T|LINE|L1
NTG	chr7	80153481	80153707	227	80153579	11	6.97193	4.67914	2.82963	Intergenic	L1Md_T|LINE|L1	Gm6567	NR_046024
NTG	chr7	83120028	83120227	200	83120204	10	8.6604	5.91234	4.23644	Intergenic	L1Md_T|LINE|L1
NTG	chr7	83393608	83393812	205	83393701	9	9.5106	6.5276	5.02946	Intron	L1Md_F2|LINE|L1	Agbl1	NM_001199224
NTG	chr7	83714697	83714910	214	83714759	6	6.14427	4.74512	2.14251	Intron	L1Md_T|LINE|L1	Agbl1	NM_001199224
NTG	chr7	83980402	83980650	249	83980541	7	7.37347	5.423	3.10364	Intron	L1Md_A|LINE|L1	Agbl1	NM_001199224
NTG	chr7	85021715	85021937	223	85021889	8	6.82411	5.04969	2.71632	Intergenic	L1Md_T|LINE|L1
NTG	chr7	85976482	85976933	452	85976647	9	9.39086	6.46161	4.91452	Intron	intron (NM_029585, intron 4 of 4)	Det1	NM_029585
NTG	chr7	85978470	85978739	270	85978544	7	5.45798	4.29988	1.76484	Intron	intron (NM_029585, intron 4 of 4)	Det1	NM_029585
NTG	chr7	92566512	92566744	233	92566696	9	5.2296	3.89928	1.58893	Promoter	L1Md_F2|LINE|L1	Vmn2r69	NM_001105182
NTG	chr7	92909403	92909781	379	92909661	7	7.10097	5.27597	2.95153	Intergenic	L1Md_A|LINE|L1	Vmn2r73;Vmn2r72	NM_001105186;NM_001105185
NTG	chr7	93718289	93718488	200	93718446	12	7.89559	5.06906	3.58616	Intergenic	L1Md_T|LINE|L1	Olfr295;Olfr294;Olfr297;Olfr298;Olfr293	NM_001011751;NM_146851;NM_001011752;NM_001011750;NM_146618
NTG	chr7	96835431	96835638	208	96835542	8	6.82411	5.04969	2.71632	Intron	L1Md_T|LINE|L1	Me3	NM_181407
NTG	chr7	99096544	99096774	231	99096671	11	10.2729	6.73292	5.74425	Intron	L1Md_T|LINE|L1	Dlg2	NM_011807
NTG	chr7	99221713	99221912	200	99221756	6	6.14427	4.74512	2.14251	Intron	L1Md_A|LINE|L1	Dlg2	NM_001243046;NM_011807
NTG	chr7	102218143	102218342	200	102218230	7	7.37347	5.423	3.10364	Intergenic	L1Md_T|LINE|L1
NTG	chr7	102327065	102327287	223	102327145	8	6.48191	4.83737	2.42644	Intergenic	L1Md_A|LINE|L1
NTG	chr7	109944791	109945039	249	109944909	7	5.75922	4.48861	1.97086	Intergenic	L1Md_T|LINE|L1	Olfr566;Olfr564;Olfr561;Olfr558;Olfr559;Olfr557;Olfr560;Olfr569;Olfr568;Olfr33;Olfr78	NM_147113;NM_147112;NM_147092;NM_147093;NM_147091;NM_147073;NM_147088;NM_130866;NM_146361;NM_001168503;NM_146359;NM_001011536
NTG	chr7	109983396	109983603	208	109983507	8	7.63555	5.53563	3.33946	Intergenic	L1Md_T|LINE|L1	Olfr566;Olfr564;Olfr570;Olfr571;Olfr561;Olfr560;Olfr569;Olfr568;Olfr572;Olfr78	NM_147113;NM_147085;NM_147110;NM_147092;NM_147091;NM_147089;NM_147088;NM_130866;NM_001168503;NM_146359;NM_001011536
NTG	chr7	110252327	110252699	373	110252511	7	7.37347	5.423	3.10364	Intergenic	L1Md_A|LINE|L1	Olfr591;Olfr589;Olfr585;Olfr584;Olfr586;Olfr583;Olfr582;Olfr592	NM_146757;NM_147087;NM_207556;NM_147111;NM_147052;NM_147053;NM_147054;NM_001011847
NTG	chr7	110348482	110348726	245	110348634	10	9.55709	6.45517	5.07275	Intergenic	L1Md_T|LINE|L1	Olfr591;Olfr589;Olfr592;Olfr593;Olfr586;Olfr594;Usp17ld	NM_147111;NM_207556;NM_146380;NM_147052;NM_207143;NM_001011847;NM_001001559
NTG	chr7	120632661	120632860	200	120632803	9	9.39086	6.46161	4.91452	Intergenic	L1Md_T|LINE|L1	Far1	NM_001285831;NM_027379
NTG	chr7	122243263	122243462	200	122243419	10	8.6604	5.91234	4.23644	Intergenic	Intergenic
NTG	chr7	130912932	130913131	200	130912974	12	7.89559	5.06906	3.58616	Intergenic	L1Md_A|LINE|L1
NTG	chr7	130913366	130913567	202	130913442	8	5.88955	4.46213	2.09186	Intergenic	L1Md_A|LINE|L1
NTG	chr7	140465114	140465313	200	140465147	7	5.75922	4.48861	1.97086	Intergenic	L1Md_T|LINE|L1
NTG	chr8	7329558	7329800	243	7329643	9	8.84168	6.1507	4.40595	Intergenic	L1Md_A|LINE|L1
NTG	chr8	7544048	7544285	238	7544197	7	7.00325	5.22208	2.85874	Intergenic	L1Md_T|LINE|L1
NTG	chr8	7694193	7694461	269	7694345	9	8.36088	5.86834	3.98927	Intergenic	L1Md_A|LINE|L1
NTG	chr8	16362399	16362598	200	16362486	5	4.62936	3.87697	1.36015	Intron	L1Md_T|LINE|L1	Csmd1	NM_053171
NTG	chr8	16890978	16891206	229	16891038	12	11.4954	7.29399	6.91875	Intron	(TA)n|Simple_repeat|Simple_repeat	Csmd1	NM_053171
NTG	chr8	19101057	19101256	200	19101118	6	6.14427	4.74512	2.14251	Intergenic	L1_Mm|LINE|L1	Spag11b;Spag11a;Defb4;Defb34;Defb14;Defb38;Defb39;Defb12	NM_001034905;NM_001286493;NM_019728;NM_152802;NM_153115;NM_183035;NM_183036;NM_183026;NM_001039563;NM_183038
NTG	chr8	19967312	19967527	216	19967427	16	6.69484	3.76082	2.63054	Intergenic	L1VL4|LINE|L1	Gm15319;2610005L07Rik;6820431F20Rik	NM_001177408;NR_030708;NR_028428
NTG	chr8	19972040	19972239	200	19972093	14	6.66361	4.01283	2.60081	Intergenic	L1VL1|LINE|L1	Gm15319;2610005L07Rik;6820431F20Rik	NM_001177408;NR_030708;NR_028428
NTG	chr8	22793833	22794032	200	22793927	6	5.36399	4.30549	1.69697	Intergenic	L1Md_F2|LINE|L1	Defa26;Defa24;Gm6696;Defa17;Defb1;Gm15315;Gm7849;AY761184;Defa6;Defa4;Defa-ps1;Gm7861	NM_001079933;NR_003146;NM_001007582;NM_010039;NM_001177518;NM_001177523;NM_001167790;NM_001177526;NM_001024225;NM_001177528;NM_007843;NM_007852
NTG	chr8	30079226	30079445	220	30079365	11	10.2729	6.73292	5.74425	Intron	L1Md_T|LINE|L1	Unc5d	NM_153135
NTG	chr8	36197818	36198177	360	36197997	85	14.5867	2.60024	9.92787	Intergenic	(TTAGGG)n|Simple_repeat|Simple_repeat
NTG	chr8	38545109	38545308	200	38545184	6	5.74046	4.52313	1.97086	Intergenic	L1Md_T|LINE|L1	Sgcz	NM_145841
NTG	chr8	38845688	38845927	240	38845834	7	7.37347	5.423	3.10364	Intron	L1Md_T|LINE|L1	Sgcz	NM_145841
NTG	chr8	42020158	42020445	288	42020261	11	10.2729	6.73292	5.74425	Intron	(GAAA)n|Simple_repeat|Simple_repeat	Pdgfrl	NM_026840
NTG	chr8	45329829	45330033	205	45329933	10	9.08475	6.17184	4.62779	Intergenic	Intergenic
NTG	chr8	47464746	47464963	218	47464862	8	8.12707	5.81545	3.77667	Intergenic	L1Md_A|LINE|L1	Helt;Acsl1	NM_173789;NM_007981
NTG	chr8	48046805	48047004	200	48046963	7	5.75922	4.48861	1.97086	Intergenic	L1Md_T|LINE|L1	Enpp6	NM_177304
NTG	chr8	53683635	53683838	204	53683665	7	5.75922	4.48861	1.97086	Intergenic	L1Md_A|LINE|L1
NTG	chr8	54200721	54200993	273	54200735	9	7.93401	5.61077	3.60345	Intergenic	L1Md_T|LINE|L1
NTG	chr8	54984864	54985063	200	54984952	8	8.65321	6.10087	4.23101	Intergenic	L1Md_F3|LINE|L1
NTG	chr8	58614650	58614849	200	58614766	8	8.12707	5.81545	3.77667	Intergenic	L1Md_Gf|LINE|L1	Glra3	NM_080438
NTG	chr8	58850947	58851161	215	58851055	8	8.12707	5.81545	3.77667	Intergenic	L1Md_A|LINE|L1	Hpgd	NM_008278
NTG	chr8	59650816	59651062	247	59650893	7	7.37347	5.423	3.10364	Intergenic	L1Md_A|LINE|L1
NTG	chr8	60462992	60463195	204	60463052	9	7.93401	5.61077	3.60345	Intron	L1Md_A|LINE|L1	Galntl6	NM_175032
[truncated: 1,068 more rows]

## Sheet: APP NTG Overlap Genes - List
1110037F02Rik
1700008F21Rik
1700012I11Rik
[truncated: 765 more rows]
